# Supplementary material for: SLC1A5 is a novel biomarker associated with ferroptosis and the tumor microenvironment: a pancancer analysis
Source: Aging (Albany NY). 2023 Aug 10;15(15):7451–75. doi: 10.18632/aging.204911 (PMC10457057; doi:10.18632/aging.204911)
Supplement: Supplementary Table 1 [file aging-15-204911-s002.xls]

## Sheet: ACC
Supplementary Table 1. The enrichment parameters of each drug in pancancer.
rank	cmap.name	enrichment
11	BX-795	0.9124
17	ingenol	0.8887
26	SB-206553	0.8482
31	prostratin	0.8231
33	PSB-36	0.8161
36	ODQ	0.7953
40	isradipine	0.7809
41	isoliquiritigenin	0.7798
50	HNHA	0.7338
67	cimaterol	0.6695
8496	sulmazole	-0.4946
8497	W-5	-0.5139
8506	L-733060	-0.5565
8513	olaparib	-0.5918
8516	NU-7441	-0.6168
8518	lobeline	-0.6359
8524	verrucarin-a	-0.6741
8530	piceid	-0.7026
8542	TG-101348	-0.8221
8545	linsitinib	-0.8378

## Sheet: BLCA
rank	cmap.name	enrichment
7	parthenolide	0.9778
11	YC-1	0.967
13	penicillic-acid	0.9528
14	parthenolide	0.9507
23	sappanone-a	0.9214
24	ingenol	0.9055
28	depomedrol	0.8878
29	prostratin	0.8862
37	isoliquiritigenin	0.8649
39	mirin	0.8508
40	anagrelide	0.8508
8509	palonosetron	-0.8012
8511	cephaeline	-0.8053
8514	ouabain	-0.8118
8521	dacinostat	-0.8462
8522	sarmentogenin	-0.8462
8526	homoharringtonine	-0.8567
8530	perhexiline	-0.8774
8534	vorinostat	-0.8897
8540	verrucarin-a	-0.9176
8545	ISOX	-0.9343

## Sheet: BRCA
rank	cmap.name	enrichment
2	VEGF-receptor-2-kinase-inhibitor-IV	0.9897
27	NPI-2358	0.9261
31	fulvestrant	0.9179
36	EHNA	0.9119
38	fluticasone	0.9109
41	QW-BI-011	0.9071
57	parthenolide	0.8775
60	isoliquiritigenin	0.8753
64	SB-216763	0.8647
74	vinorelbine	0.8409
8531	staurosporine	-0.9757
8535	BIIB021	-0.9782
8537	purvalanol-a	-0.9789
8539	PI-103	-0.9799
8540	ellipticine	-0.981
8541	CS-110266	-0.9811
8544	linsitinib	-0.9834
8546	ochratoxin-a	-0.9838
8547	amonafide	-0.9852
8557	palbociclib	-0.9972

## Sheet: CESC
rank	cmap.name	enrichment
3	YC-1	0.9951
5	PD-168077	0.9904
18	parthenolide	0.9598
19	sappanone-a	0.9588
20	MLN-4924	0.9495
21	parthenolide	0.9471
24	quinoclamine	0.9335
29	ZK-756326	0.9249
32	mitomycin-c	0.9126
33	KF-38789	0.9124
8484	perhexiline	-0.845
8486	tyrphostin-AG-1478	-0.849
8488	homoharringtonine	-0.8506
8489	sorafenib	-0.8522
8508	torin-1	-0.8995
8511	THM-I-94	-0.9039
8514	torin-2	-0.9065
8522	verrucarin-a	-0.9328
8525	ISOX	-0.9432
8531	HLI-373	-0.9584

## Sheet: CHOL
rank	cmap.name	enrichment
6	triciribine	0.9729
17	phorbol-12-myristate-13-acetate	0.9452
20	prostratin	0.9383
28	ingenol	0.9288
34	homosalate	0.9177
36	kinetin-riboside	0.9048
42	clofarabine	0.8943
45	flubendazole	0.8905
46	QW-BI-011	0.889
47	SSR-69071	0.8774
8519	ISOX	-0.8103
8527	epoxycholesterol	-0.8405
8529	SB-202190	-0.8496
8530	17-hydroxyprogesterone-caproate	-0.8507
8531	apicidin	-0.8511
8532	loteprednol	-0.8524
8533	baeomycesic-acid	-0.854
8539	dilazep	-0.8862
8551	TG-101348	-0.9482
8553	SB-221284	-0.9624

## Sheet: COAD
rank	cmap.name	enrichment
2	CAY-10618	0.976
4	1-phenylbiguanide	0.969
10	dihydro-7-desacetyldeoxygedunin	0.9226
12	guaifenesin	0.9073
14	angiogenesis-inhibitor	0.8919
16	ZK-164015	0.8782
18	SB-216763	0.8438
19	z-prolyl-prolinal	0.8278
20	BMY-45778	0.8232
23	GSK-3-inhibitor-IX	0.8065
8524	AR-A014418	-0.843
8526	ziprasidone	-0.8467
8530	isoflupredone	-0.856
8533	iloperidone	-0.8664
8535	dapsone	-0.8678
8536	methyl-angolensate	-0.8736
8539	EI-247	-0.8879
8540	cobalt(II)-chloride	-0.907
8541	homoharringtonine	-0.9098
8551	amonafide	-0.943

## Sheet: DLBC
rank	cmap.name	enrichment
7	hydrocortisone	0.9501
20	CAY-10618	0.8896
22	econazole	0.8872
23	ingenol	0.8828
27	fluticasone	0.8695
32	CA-074-Me	0.8454
39	SB-239063	0.8205
41	triciribine	0.815
43	BRD-K06817181	0.8083
56	UK-356618	0.7659
8513	BI-2536	-0.5931
8520	XMD-1150	-0.6467
8523	geranylgeraniol	-0.661
8526	prunetin	-0.6707
8528	ziprasidone	-0.6848
8530	rilmenidine	-0.6889
8534	NSC-23766	-0.6966
8540	tofacitinib	-0.7772
8546	TG-101348	-0.8836
8548	parbendazole	-0.9011

## Sheet: ESCA
rank	cmap.name	enrichment
3	parthenolide	0.9872
5	exemestane	0.9769
6	kinetin-riboside	0.9732
7	CA-074-Me	0.9671
10	isoliquiritigenin	0.9597
11	penicillic-acid	0.9591
13	parthenolide	0.957
15	15-delta-prostaglandin-j2	0.9517
16	MLN-4924	0.9448
17	flavokavain-b	0.9427
8524	trichostatin-a	-0.7291
8527	ZM-306416	-0.7378
8533	WYE-125132	-0.7712
8535	PI-828	-0.7784
8538	BI-2536	-0.7937
8539	THM-I-94	-0.7991
8544	7,4'-dihydroxyflavone	-0.8557
8547	homoharringtonine	-0.8738
8550	verrucarin-a	-0.9206
8552	dactolisib	-0.9414

## Sheet: GBM
rank	cmap.name	enrichment
14	EI-346-erlotinib-analog	0.9098
18	SCH-28080	0.8866
27	chlortetracycline	0.8592
30	BNTX	0.8543
33	ingenol	0.8346
40	cyclosporin-a	0.8211
46	obatoclax	0.7936
51	hydrocortisone	0.767
58	tropisetron	0.7392
64	QS-11	0.7243
8468	baeomycesic-acid	-0.7793
8472	dacinostat	-0.7864
8477	belinostat	-0.7958
8491	floxuridine	-0.8331
8509	ISOX	-0.8841
8515	scriptaid	-0.9003
8520	tyrphostin-AG-1296	-0.9073
8526	TG-101348	-0.9161
8529	CS-110266	-0.9181
8552	LY-303511	-0.9868

## Sheet: HNSC
rank	cmap.name	enrichment
15	PU-H71	0.9785
17	EMD-386088	0.9757
20	vemurafenib	0.9749
28	myricetin	0.966
33	NVP-AUY922	0.9514
38	tivozanib	0.9459
45	rivaroxaban	0.9366
54	GSK-3-inhibitor-II	0.9214
61	afatinib	0.9132
62	QL-XI-92	0.9113
8525	narciclasine	-0.9246
8526	ingenol	-0.9248
8527	phorbol-12-myristate-13-acetate	-0.9266
8528	prostratin	-0.9283
8531	hydrocotarnine	-0.9359
8535	vincristine	-0.9405
8542	xanthoxyline	-0.9543
8547	PD-168077	-0.9627
8548	podophyllotoxin	-0.965
8550	KF-38789	-0.9698

[truncated: 23 more sheets: KICH, KIRC, KIRP, LAML, LGG, LIHC, LUAD, LUSC, MESO, OV, PAAD, PCPG, PRAD, READ, SARC, SKCM, STAD, TGCT, THCA, THYM …]
