# Supplementary material for: SLC1A5 is a novel biomarker associated with ferroptosis and the tumor microenvironment: a pancancer analysis
Source: Aging (Albany NY). 2023 Aug 10;15(15):7451–75. doi: 10.18632/aging.204911 (PMC10457057; doi:10.18632/aging.204911)
Supplement: Supplementary Table 3 [file aging-15-204911-s004.xls]

## Sheet: ACC
Supplementary Table 3. Differentially expressed genes between the high and low SLC1A5 expression groups.
GeneSymbol	logFC
ADAM6	3.3974
SLC1A5	3.20764
IGJ	3.1537
TNFSF12-TNFSF13	2.95593
CD3D	2.90479
CXCL9	2.83091
SERPINA1	2.82994
PTGDS	2.81758
MAGED4	2.80377
LOC84856	2.7764
CPXM1	2.77511
CD2	2.67796
MAGED4B	2.64289
GZMK	2.63689
GBP5	2.58588
MFI2	2.57206
CDCP1	2.56583
C1orf38	2.56338
EMILIN3	2.51331
CD8A	2.5083
MMP9	2.50748
CHI3L1	2.48146
CD3E	2.47367
CD48	2.45796
IRF4	2.4574
MFAP2	2.4551
F13A1	2.44492
STK32B	2.44457
CXCL10	2.43011
NCF1	2.40432
MGC29506	2.39893
S100B	2.39645
MRC2	2.38332
TYMP	2.38249
CRIP1	2.3793
GZMA	2.37685
CYTIP	2.37174
OLFML3	2.36347
SECTM1	2.36006
CD7	2.35993
IL2RG	2.35015
SPINT1	2.34733
NCKAP1L	2.34321
TNC	2.34124
PIK3R6	2.3366
PLBD1	2.33471
SUSD3	2.32738
SLC2A5	2.32436
TMEM176A	2.30552
PDCD1	2.30478
AQP9	2.30076
ARHGAP9	2.29445
C2	2.28505
C10orf125	2.28253
GZMH	2.28097
BATF	2.26568
CST7	2.26537
PTK7	2.24943
C1QA	2.24561
PYCARD	2.24426
LAG3	2.24043
AIF1	2.23817
PKP1	2.23458
UBD	2.23244
ANKRD22	2.23124
LST1	2.22311
SIRPG	2.22153
LILRB4	2.20976
CD300A	2.20882
RHOH	2.20876
HAAO	2.20736
PDE6B	2.2024
SH3BP1	2.19387
CD4	2.19323
CARD16	2.19185
FPR1	2.18516
MYB	2.17855
TMEM176B	2.17653
KLHDC7B	2.17641
LILRB2	2.17312
CORO1A	2.15996
SEMA4A	2.14675
C1QB	2.14256
TPSB2	2.14075
SLA	2.13794
CD52	2.13786
EMR1	2.13583
FOLR2	2.13427
NCF1C	2.12969
RUNX3	2.12904
BCL2A1	2.12642
LIMD2	2.12144
HCK	2.12024
FCER1G	2.11959
COL9A3	2.11749
RARRES3	2.11698
FZD10	2.11689
CD209	2.11045
CSTA	2.11022
NCF4	2.10899
P2RY6	2.10862
GPR183	2.10469
HLA-DQA2	2.10267
NCRNA00181	2.10052
SLAMF7	2.09739
METRNL	2.09684
MS4A4A	2.09519
GNG4	2.09469
ICAM4	2.09383
C1orf162	2.09288
TIGIT	2.0917
TPSAB1	2.09073
APOL4	2.0865
HCST	2.0836
IL12RB1	2.08238
WAS	2.08108
C1QC	2.07955
FCGR1A	2.07821
CD8B	2.07819
CD28	2.07802
VMO1	2.07726
TMEM119	2.07229
NCF2	2.07193
CD33	2.06879
NAPSB	2.06824
IBSP	2.06741
MFSD2A	2.06413
GNG2	2.06396
AOAH	2.06323
PDPN	2.05934
FAIM3	2.05852
SLAMF6	2.05515
ITGB2	2.05474
LAIR1	2.0504
S100A9	2.05002
PLEK	2.04702
CD53	2.04229
WIF1	2.03463
SELENBP1	2.03425
TLR8	2.03405
FCGR1C	2.02303
PTGS1	2.0176
CD74	2.01745
TBC1D10C	2.01497
TYROBP	2.01287
ITK	2.0126
TRPV4	2.01106
IGSF21	2.00983
CCL5	2.00908
ZAP70	2.00783
LY86	2.00631
FAM20A	2.00496
HES4	2.00371
NLRP3	2.00023
SIGLEC14	1.99934
LILRA5	1.99564
HLA-DRA	1.99001
KRT8	1.98975
LYZ	1.9882
KCNF1	1.9875
PTPN22	1.98469
MGAM	1.98396
CTLA4	1.97935
PDLIM4	1.97932
MATK	1.97804
CCR5	1.97617
SFRP2	1.97607
TNNT1	1.97543
CPNE7	1.97247
CXCR6	1.97177
CD163	1.96972
STRA6	1.96888
CD69	1.96843
CERKL	1.96616
CSF1R	1.96598
HAS1	1.96495
GZMM	1.96382
IL2RA	1.96239
AIM2	1.95998
HLA-DOA	1.9593
MS4A6A	1.95798
CCL19	1.95717
CYBA	1.95659
RNASE6	1.95326
OXER1	1.95257
GPR65	1.94898
PTPRC	1.94494
SH2D1A	1.94401
TMEM200B	1.94199
TBXAS1	1.94115
CD27	1.93701
CYBB	1.93662
TMPRSS3	1.93586
HK3	1.93213
NCF1B	1.93133
CARD9	1.9304
PTX3	1.92909
SAMD3	1.92783
DOK2	1.9271
CXCL11	1.92624
ST14	1.92424
GZMB	1.92355
CD70	1.9212
BTK	1.91881
CPNE5	1.9187
CLDN11	1.91643
S100A4	1.91508
SIT1	1.91507
VSIG4	1.91091
SYTL1	1.9071
FCGR2A	1.90646
EPHX3	1.90575
TRPM2	1.90539
ALOX5	1.90458
MMP17	1.90354
ANPEP	1.90354
PARVG	1.9027
ISLR	1.90111
CCR1	1.89627
LCK	1.89606
HLA-DPB1	1.89502
CLCF1	1.89479
ODF3B	1.89241
BIN2	1.89054
SIGLEC1	1.8905
RAB34	1.89002
FYB	1.88699
CCL13	1.88513
PLAU	1.88503
PLAC8	1.87913
KLRK1	1.8786
GNA15	1.87831
IKZF1	1.87693
CSF2RA	1.8753
GRIN2D	1.87518
RAC2	1.8736
EVC2	1.86737
MDFI	1.86599
F12	1.86549
PIK3CD	1.86482
PLCB2	1.86165
NFAM1	1.85989
ITGAL	1.85922
NKG7	1.85746
SAMSN1	1.85679
RLTPR	1.85638
NBL1	1.85384
SIGLEC7	1.85332
LTB	1.85189
TNFRSF1B	1.85117
LOC606724	1.85071
RPS4Y1	1.84829
GNLY	1.84749
CSF3R	1.84666
LY9	1.84461
MEIS3	1.84403
FCGR3A	1.84311
CXCL13	1.843
TNFRSF18	1.84252
LILRA3	1.83865
GPSM3	1.8379
IRF8	1.83656
SPN	1.83601
C16orf54	1.83469
AREG	1.8336
TMC6	1.83308
ID1	1.83062
CLEC4E	1.82876
RASL11B	1.82861
HLA-DRB6	1.82579
SASH3	1.81933
RGS10	1.81823
TNFRSF10D	1.81357
BATF3	1.81272
IGFBP4	1.81249
SAMD11	1.81226
EMILIN2	1.81013
SPI1	1.80947
HSPA6	1.80792
KYNU	1.80777
ARHGAP15	1.80729
MARCO	1.80465
CD300C	1.80437
PTPRCAP	1.80383
KRTCAP3	1.80376
UBASH3A	1.80095
ATHL1	1.79965
C17orf60	1.79614
CD180	1.79583
TMC8	1.7949
HMGA1	1.79446
NRGN	1.79127
FAM167A	1.7896
LASS1	1.78913
SELL	1.78711
LILRB3	1.7864
COL1A1	1.78462
APBB1IP	1.78338
SYT11	1.77949
PDCD1LG2	1.77935
CLEC4G	1.77874
CD247	1.77872
DKK2	1.77776
MEX3A	1.77768
CIITA	1.77511
MME	1.77445
CAPG	1.77379
CLEC7A	1.76617
CLEC10A	1.76448
CXCR3	1.76429
FAM20C	1.76426
STEAP1	1.7624
PLAUR	1.76196
GAL	1.76089
MYO1F	1.76059
A1BG	1.75536
SLC15A3	1.75521
MMP2	1.755
GPBAR1	1.75499
S100A13	1.75396
SLAMF8	1.75334
SLC22A18AS	1.75103
KCNN4	1.75097
NPNT	1.74872
LILRA6	1.74573
SH2D2A	1.7457
LCP2	1.74437
ITGAM	1.74349
CD6	1.74335
TMEM132C	1.74124
CNN2	1.74008
VAV1	1.73724
COMP	1.73692
APOBEC3G	1.73564
CR1	1.73464
KLHL6	1.73388
TNFAIP8L2	1.73057
C10orf10	1.72773
TMEM71	1.72564
VENTX	1.72548
SOX11	1.72489
TMEM150B	1.72328
CLDN5	1.72126
HLA-DRB1	1.71965
C17orf87	1.71926
STAB1	1.71865
MPEG1	1.71864
ELFN1	1.71771
SERPINF1	1.71727
S100A8	1.71663
TGFB1	1.71636
SCN9A	1.71542
KLRB1	1.71312
P2RY13	1.71284
NNMT	1.7122
GMFG	1.71162
RTBDN	1.71156
C19orf35	1.71008
CMKLR1	1.71003
CXorf21	1.70945
DPEP2	1.70728
ZBP1	1.70617
SLC30A3	1.70558
SELPLG	1.7038
GGTA1	1.70176
DPT	1.7003
IRX3	1.70029
GPR132	1.69834
S100A16	1.69673
IGF2BP2	1.69649
C13orf18	1.6959
AMICA1	1.69379
TRAF3IP3	1.69372
LGI4	1.69192
MT1M	1.69119
COL3A1	1.68928
C5AR1	1.68703
PYHIN1	1.68644
RNF175	1.68599
CCL8	1.68398
MX2	1.68342
SYK	1.68195
ACP5	1.68141
CD37	1.6812
EVI2A	1.68063
IL10RA	1.68063
CD79A	1.67946
ORM1	1.67676
LILRB1	1.67645
EMP3	1.675
IL10	1.67389
IL2RB	1.67214
ICOS	1.67038
COL6A2	1.67
GSDMA	1.66809
ADAMTS14	1.66434
CCL4	1.66405
ITGB7	1.66389
PRRX2	1.66339
MS4A7	1.66336
S100A3	1.66284
PLA2G7	1.66246
TMEM154	1.66217
LGALS2	1.6618
RGS18	1.66169
DEF6	1.66038
ITGA4	1.65968
LOC84740	1.65956
COL1A2	1.65753
HCLS1	1.65726
FXYD1	1.65642
PTPRO	1.6554
CLECL1	1.65376
GJB2	1.65323
C2orf89	1.65315
CACNA2D4	1.65309
FGD2	1.64923
CCR2	1.64772
VASN	1.64679
FCGBP	1.64671
TBX21	1.64629
TM6SF2	1.64598
IGSF6	1.64568
KIAA0748	1.64541
CLEC12A	1.64388
LAT2	1.64168
CCL18	1.64111
ESPNL	1.64088
MYO1G	1.6395
TIMD4	1.63857
ARSI	1.636
PRKCB	1.63579
ADAMDEC1	1.63435
IRF7	1.63379
HAVCR2	1.63297
RASGRP2	1.6284
DHRS9	1.62827
RPS27	1.62791
AGAP2	1.62744
LAPTM5	1.62702
LOC100270710	1.62648
FCGR1B	1.62622
ROR2	1.62462
IFITM1	1.6226
RIPK3	1.62052
CD14	1.61824
KIAA1199	1.61691
ATP10A	1.61502
TBX2	1.61381
RFX8	1.61235
NXPH4	1.6118
LGALS9	1.61152
IFITM2	1.61052
DDX3Y	1.61005
ANO9	1.60929
GPR171	1.608
C3orf54	1.60765
B4GALNT4	1.60258
NXPH3	1.60161
C13orf33	1.59932
CSF2RB	1.59878
PYY2	1.5984
MICAL1	1.59811
FCGRT	1.59777
PRF1	1.59392
CRYBB1	1.59365
CASP1	1.59332
FAM176B	1.59317
SFN	1.59261
VAV3	1.59186
HPGDS	1.59144
LPAR5	1.59054
AEBP1	1.59041
ARL4C	1.58959
RGS1	1.58939
STAT4	1.58926
ZNF69	1.58698
CPT1C	1.58632
EVI2B	1.58458
RASGRP4	1.58448
VAMP8	1.58313
WNT6	1.5831
SPESP1	1.58214
PADI2	1.58101
ASB9	1.58024
EBI3	1.58005
SLAMF1	1.5793
PRTN3	1.57799
CCR7	1.57772
ICAM1	1.57732
CHRNE	1.57437
FOXL1	1.57282
CCL4L2	1.57142
SIDT1	1.56919
CD300LF	1.56836
TLR7	1.56795
PIK3R5	1.56703
C19orf38	1.56625
WDFY4	1.56574
FBLL1	1.56434
FCN1	1.56418
CARD11	1.5641
CTSW	1.56406
ASCL2	1.56381
LGI2	1.56294
GPR34	1.56126
GBP4	1.56054
PCDHB5	1.55916
HLA-DQA1	1.55874
DLGAP2	1.5569
CD244	1.55662
HRH1	1.55452
SPHK1	1.55327
GPR124	1.55275
FES	1.55178
ELN	1.55064
FGD3	1.54744
ZNF831	1.54538
PTGER4	1.54414
MRC1	1.54208
IL16	1.53821
PHLDA2	1.53728
ADAM28	1.53572
FOLH1	1.53268
LYPD1	1.5318
ADAP2	1.53113
LUM	1.5297
CHST15	1.5291
CD5L	1.52874
NINJ2	1.52808
UNC5B	1.52772
SULF1	1.52733
SUSD2	1.52732
LY6H	1.52638
CHADL	1.52544
SIGLEC10	1.52518
CRTAM	1.52515
VCAN	1.52429
DKK3	1.52376
CYTL1	1.52218
RHOD	1.52107
CYP2S1	1.52034
SERPING1	1.52018
INPP5D	1.51946
EPHB6	1.51831
FXYD5	1.51703
PLXDC1	1.51483
ST8SIA4	1.51331
FCRL5	1.51234
FABP5	1.5118
ADAMTSL2	1.51142
POU2AF1	1.51024
GIMAP1	1.50911
FPR2	1.50852
ISYNA1	1.50806
KRT17	1.50716
CD3G	1.50623
PRDM1	1.50602
MSR1	1.50563
L1CAM	1.50361
TREM2	1.50272
COL8A2	1.50252
HLA-DRB5	1.50183
CD300LB	1.50069
ADORA3	1.49824
OLFML2A	1.49717
IL1B	1.49508
GPR153	1.49412
C1orf70	1.49381
COL24A1	1.49272
ARID5A	1.49267
C11orf63	1.49128
APLNR	1.48986
IFI30	1.48912
MOV10L1	1.48859
STX11	1.48717
ITGAX	1.48699
MBP	1.48474
CGREF1	1.48394
HVCN1	1.48319
MFAP4	1.48029
RAP1GAP2	1.48029
FMOD	1.47973
FAM109B	1.47943
PMEPA1	1.4748
CXCR2P1	1.47412
GDF1	1.47344
FAM26F	1.4732
TRAT1	1.47145
ACAP1	1.47069
MUC1	1.46965
TLR2	1.46883
TMEM54	1.46841
CFD	1.46567
RASSF2	1.4652
ARHGAP30	1.46366
HLA-DQB2	1.4635
NFE2	1.46289
FXYD7	1.46244
FCER2	1.46166
SLC17A9	1.4601
POU2F2	1.45759
CLIP3	1.45428
SLC11A1	1.45333
HMHA1	1.4531
LBH	1.45289
LILRA2	1.45245
KCNK5	1.4511
APOB48R	1.44936
HDC	1.44873
DIRAS1	1.44843
KDM5D	1.44836
RGS19	1.44737
LYL1	1.44612
VNN1	1.44605
CD72	1.44575
SPON2	1.44401
SMTNL2	1.44365
IL18	1.44354
DBN1	1.44329
FERMT3	1.4424
PITPNC1	1.4421
TFEC	1.44069
C5orf20	1.44027
CX3CL1	1.4395
PLTP	1.43883
GALNT6	1.43768
OSCAR	1.43596
CD38	1.43585
PILRA	1.43494
MMP25	1.43451
SCML4	1.43323
GTSF1	1.43306
FN1	1.43302
NRARP	1.4318
TNFSF8	1.43029
STEAP2	1.42983
MAP4K1	1.42965
IL12A	1.42864
OSM	1.42828
SCT	1.42784
GIMAP5	1.42749
LOC100130776	1.42686
SGK223	1.4243
FYN	1.42326
MXRA8	1.42292
MT1G	1.42234
PTGS2	1.42222
ARHGDIB	1.42195
BARX1	1.4217
ZNF662	1.42159
SLCO2B1	1.42044
MAPK11	1.42005
VSIG2	1.41709
CCL3	1.41333
ICAM5	1.41293
IPCEF1	1.41279
GNGT2	1.41147
GPAT2	1.41049
FCGR2B	1.40999
TMEM156	1.40974
KIAA1274	1.40971
PTGES	1.40899
C15orf48	1.4057
SOX8	1.4055
SH3TC1	1.40532
TNFRSF4	1.40511
AGRN	1.40491
RERGL	1.40392
CD1C	1.40106
ICA1	1.40105
SLC38A5	1.401
C16orf89	1.39961
MS4A14	1.39918
LINGO1	1.39903
KCNMB1	1.39898
KIF21B	1.39782
ZNF695	1.39721
ZFP57	1.39693
C19orf26	1.39579
C1QL4	1.3953
FAM27A	1.39397
FAM132A	1.39364
EGFL7	1.3932
CTHRC1	1.39186
RASAL3	1.39135
POPDC3	1.39091
GRAP2	1.39049
RCN3	1.38888
OLFML2B	1.3884
TCL1A	1.38545
FNDC1	1.38538
MARCKS	1.38488
PLEKHG6	1.38404
PLA2G2D	1.38339
HLA-DQB1	1.38303
FHL3	1.38169
COL23A1	1.38163
F2RL3	1.38103
FKBP1B	1.38034
GRASP	1.37975
CLDN10	1.37798
BATF2	1.37737
PROCR	1.37728
EMP1	1.37705
SIGLEC5	1.37687
SMPDL3B	1.37594
FAM159A	1.37571
EGFL6	1.3756
FBLN1	1.37555
LRRC17	1.37553
ID4	1.37426
GPR84	1.37294
ISLR2	1.37251
GGTLC2	1.37165
CILP2	1.37142
GATA2	1.371
SIRPB2	1.37046
C16orf74	1.36976
JAG2	1.36605
LOC96610	1.36532
CXCL1	1.3646
CD84	1.36432
IL18RAP	1.36386
SCN1B	1.36378
RNF144B	1.36342
PARP15	1.36322
CLIC3	1.36201
HAPLN3	1.36196
COX4I2	1.36152
FGR	1.35897
RASA3	1.35828
SRGN	1.35751
HLA-DPA1	1.3563
GDF5	1.35555
SPIB	1.3546
COBL	1.35437
NAALADL1	1.35394
LRRC33	1.3536
DHDH	1.35319
HAMP	1.35295
LOC100130872	1.35285
TMEM106A	1.35235
LOC389458	1.35056
KIAA0125	1.34999
SALL1	1.34989
LYPD6B	1.3492
RAMP1	1.34915
SIGLEC12	1.34896
EMILIN1	1.34838
PHGDH	1.34763
PRDM8	1.34738
LGALS9C	1.3461
COTL1	1.34548
IL1RN	1.34541
IL6	1.3453
PPP1R1B	1.34527
HPSE	1.3446
GFPT2	1.34452
C3AR1	1.34436
CD200R1	1.34411
TRIM46	1.34221
HLA-DOB	1.3415
ID3	1.3409
C9orf167	1.3407
CSMD1	1.3404
MGAT3	1.33867
SIX2	1.33646
ITGA2B	1.33619
MEFV	1.33498
ANGPTL4	1.33483
PDIA2	1.33438
CRIP2	1.33331
KCNK6	1.33217
ABI3	1.33085
BCL2	1.33064
WTIP	1.32965
OASL	1.32955
C10orf55	1.32945
BGN	1.32933
CFP	1.32886
IDO1	1.32878
ARHGAP25	1.32757
SAMD14	1.32516
KCNK17	1.32465
LRRK1	1.32456
SCNN1G	1.32311
GPRIN3	1.32291
ALOX5AP	1.32224
PIK3AP1	1.32115
ISG15	1.31987
MIR155HG	1.31793
FCGR2C	1.31687
SMOC2	1.31671
ZMYND15	1.31596
C6orf105	1.31538
GLT8D2	1.31501
TSKU	1.31476
BASP1	1.31456
IL21R	1.31453
DOK3	1.31369
BEND4	1.3134
ADAM12	1.31207
PODNL1	1.31199
LTK	1.31185
ORM2	1.31136
SARDH	1.31127
UNC13D	1.31103
TMSB10	1.31103
GPR18	1.31083
ASGR2	1.31018
PTK6	1.30964
THY1	1.30962
CD79B	1.30911
SP140	1.3088
BST1	1.30747
B3GNT5	1.30678
DDAH2	1.3061
PALM3	1.30447
HGF	1.30439
COX6B2	1.30282
TMEFF2	1.30127
MMP28	1.29936
GPR55	1.29909
GFI1	1.2973
KLRD1	1.29625
PABPC4L	1.2962
ESRRB	1.29617
LILRA1	1.29604
MAPK12	1.29509
CLCA2	1.29432
BMP7	1.29393
GAS7	1.29383
KLF2	1.29258
XPNPEP2	1.29232
STAC3	1.29231
SV2A	1.29173
EGFLAM	1.29162
ARRB2	1.29155
FMNL1	1.29107
SNX20	1.29101
CD93	1.29075
EREG	1.2906
CYR61	1.2903
BVES	1.28779
NPB	1.28759
PRND	1.28611
RAC3	1.28608
GSDMB	1.28557
NOTUM	1.28554
IL15RA	1.28482
MFRP	1.28357
ECHDC3	1.28347
CDC42EP5	1.28335
RPL21	1.28196
PECAM1	1.28143
EFNB3	1.28143
LPAR6	1.28119
OAS2	1.28061
TPPP3	1.28004
TMEM59L	1.27957
LBX2	1.27942
RCSD1	1.27932
FOXF2	1.27891
SLC27A3	1.27735
IL3RA	1.27718
MAP2K6	1.27655
BTLA	1.27611
TACSTD2	1.27559
LFNG	1.27552
P4HA3	1.27456
RASSF4	1.27435
NACAD	1.27419
TTYH1	1.27418
ARRB1	1.27407
P2RY10	1.27343
WDR86	1.27294
FAM171A2	1.27274
MT1A	1.27223
VIPR1	1.27222
PLXND1	1.26918
IGFBP1	1.26804
TGFBI	1.26801
PRKX	1.26554
LOXL2	1.26489
PXDN	1.26422
C2orf55	1.26346
MSLN	1.26292
HEY1	1.26213
S1PR4	1.26199
PRKY	1.26159
TDO2	1.2613
MT1L	1.26053
TAL1	1.25855
KLRC3	1.25841
CMTM2	1.25841
FAM78A	1.25839
COL6A3	1.25765
NLGN4Y	1.25764
HOXA2	1.25753
MS4A2	1.25736
MAPK15	1.25726
C1orf54	1.25678
VILL	1.25668
CHST1	1.25655
SOCS3	1.25641
IL27RA	1.25625
FLT3	1.25516
SOX17	1.2549
PTPN7	1.25424
RUNX1	1.25351
MPZL2	1.25313
C11orf21	1.25304
TNFRSF25	1.25272
SCARF2	1.25238
GIMAP8	1.25198
AURKB	1.25182
NELL2	1.25138
EPS8L1	1.25133
EFNB2	1.25078
DYDC2	1.25066
RTN4RL1	1.25054
SLC2A3	1.25019
TCF7L1	1.24828
FRAS1	1.24802
MARVELD1	1.24746
TMEM171	1.24716
CLEC9A	1.247
GJC2	1.24679
AMN	1.24642
CEACAM21	1.2462
RNASE1	1.24524
NXN	1.2439
GAPT	1.24376
COL6A1	1.24355
CD68	1.24342
CD248	1.24332
HES7	1.24317
MAP3K8	1.2421
CCL21	1.24167
ABCA6	1.24139
IRX6	1.24094
NTRK1	1.23978
SPTBN5	1.23961
HTR7	1.23939
SHOX2	1.23908
AJAP1	1.23841
FOXC2	1.23812
TNK1	1.23684
CYorf15B	1.23648
LRMP	1.23647
SEMA4C	1.23557
EMR2	1.23442
GPR126	1.23343
STON2	1.23308
CORO2B	1.23303
SLC7A7	1.23303
FRZB	1.23292
HRC	1.23246
DAPP1	1.23148
EBF3	1.23129
TNFRSF14	1.23083
LPAR2	1.22983
GIMAP7	1.22968
GSTM5	1.22948
PKP3	1.22872
CLDN7	1.22799
FHDC1	1.22772
CDC20	1.22746
RUNX2	1.22735
IDH2	1.22716
INHBB	1.22673
CACNB3	1.2264
CCDC48	1.22552
ITPRIPL1	1.22537
CD5	1.22486
MLC1	1.22398
CLEC2B	1.2235
GLB1L3	1.2233
RAB42	1.22302
CD1D	1.22245
LOC100271831	1.22199
GPC3	1.22145
THBS1	1.22143
SIX1	1.22127
UTY	1.22126
SH2B2	1.22124
CTGF	1.2206
SFRP5	1.21963
C4orf48	1.21934
ARHGAP22	1.21868
CYS1	1.21834
LAMC2	1.21771
CD80	1.21747
SYT6	1.21735
NPL	1.2168
OR2A9P	1.21443
CD40LG	1.2141
CD24	1.2139
TREML2	1.21334
BLM	1.21246
SLC35F2	1.21218
ITGA10	1.21128
FAM179A	1.20838
KLHDC8A	1.20811
CXCL16	1.20788
IL27	1.20768
FBXO40	1.20726
NPW	1.20705
PODN	1.20645
LIPC	1.20615
GAL3ST4	1.20512
GLT1D1	1.20378
PLEKHO1	1.202
PCDH7	1.20184
ITM2A	1.20112
ACSL5	1.20103
TPSD1	1.20081
GREM1	1.19986
IRF5	1.19964
ABCA9	1.19938
IFITM3	1.19896
CILP	1.19893
HLA-DMA	1.19892
ISL2	1.19855
GSTM1	1.19751
WNT5B	1.19681
TSPAN11	1.19666
PCSK1	1.19612
FAIM2	1.19611
SLC16A5	1.19594
PDE4A	1.19498
FGF13	1.19427
GDF15	1.19414
MYL4	1.19401
GPR77	1.19397
LRRC4B	1.19318
FAM124B	1.19312
SLC7A2	1.19201
OSR1	1.19167
IRX5	1.19129
GRAP	1.19109
RELT	1.19072
GPR114	1.19001
PRAM1	1.18973
UPK3BL	1.18935
HIGD1B	1.18927
FAP	1.18908
TMEM158	1.18901
C8orf4	1.18852
KERA	1.18842
PTPRJ	1.188
FBLIM1	1.18785
SCNN1B	1.18738
FUT1	1.18719
CD97	1.18701
SNRPN	1.18659
FGL2	1.18586
TCF21	1.184
GIMAP4	1.18366
MEI1	1.18252
C17orf107	1.18225
ATOH8	1.18192
PKIB	1.18179
PTGIR	1.18027
STAP1	1.17929
FPR3	1.17851
OTOA	1.17787
PCDH10	1.17772
SIGIRR	1.17761
PLEKHG2	1.17725
C1QTNF1	1.17607
SNAI1	1.17539
PLD4	1.17477
HAPLN4	1.17465
GPR4	1.17438
MAGEC2	1.17329
CD86	1.17296
MFNG	1.17263
PLAC2	1.17186
GSDMD	1.17145
DOCK2	1.17119
NTRK2	1.17112
SCGB3A1	1.17074
CTSG	1.17067
MMP1	1.1699
LYG1	1.16957
PLAC1	1.16926
CSF1	1.16852
TMEM151A	1.16839
RHBDF2	1.1681
ITGA11	1.16719
DDN	1.1664
TEAD4	1.16624
MEGF6	1.16518
DENND3	1.16418
SLC24A3	1.16412
FHL2	1.16234
GGT5	1.16195
SCRG1	1.16149
ICOSLG	1.16135
TSHZ3	1.16117
ADAMTS2	1.16095
LAMA1	1.16081
COL5A1	1.16081
EPPK1	1.16031
PLA2G5	1.16005
TRIM58	1.15971
TNFRSF13B	1.15965
ZNF560	1.15959
TM4SF1	1.15906
CLEC1A	1.15901
DENND2A	1.15834
LDLRAD2	1.15795
CCL23	1.15773
DEPDC7	1.15771
HOXB4	1.15684
ODAM	1.15533
EBF4	1.15531
PTN	1.15388
MMP23B	1.1538
A4GALT	1.1538
NECAB2	1.15379
COCH	1.15356
VANGL2	1.15318
GRIK2	1.1516
OIT3	1.14998
TNFRSF11B	1.14942
GEM	1.14883
FGFR3	1.14882
PLAT	1.1488
LOC441869	1.14865
RASL11A	1.14822
CTAGE4	1.14671
CHRDL2	1.14539
NTRK3	1.14501
TNS4	1.14498
PPM1M	1.14464
NRN1	1.14464
SAGE1	1.14456
C1orf186	1.14439
CBLN1	1.14316
PI15	1.14297
ACY3	1.1399
GPR82	1.13832
PLA2G4A	1.13709
ADM2	1.13697
USP9Y	1.13641
THSD1	1.13633
BAIAP2	1.13591
NOX4	1.13584
CHST2	1.13511
ADAM33	1.13436
CCL3L1	1.13429
GPC6	1.13421
LY75	1.13385
SGIP1	1.13353
EIF1AY	1.13255
APOBEC3F	1.13199
HBD	1.13107
AXL	1.13017
NKD2	1.12934
PRKCQ	1.1288
CMTM7	1.12879
OLFML1	1.12865
LAX1	1.12862
FASLG	1.12787
HRCT1	1.12786
ALDH1L2	1.12772
TNFSF12	1.12771
CITED4	1.12734
CP	1.12725
CDCA7	1.12694
PTH2R	1.12625
FLI1	1.12621
TMIGD2	1.12599
HMOX1	1.12584
BMP6	1.12574
MYH13	1.12541
PDLIM7	1.12465
LOC84989	1.12415
NCRNA00092	1.12315
CTSK	1.12276
MUSTN1	1.12148
CLEC14A	1.12105
EPYC	1.12095
EFS	1.1204
PCDHB9	1.11996
ZNF642	1.1199
SPSB1	1.11981
LRRC10B	1.11924
LOC90246	1.11893
ROBO3	1.11856
CNKSR1	1.11827
ANGPT2	1.11796
EPHA1	1.11774
NLRP6	1.11759
CCL20	1.11738
FAM66D	1.11721
RAB3IL1	1.11653
FUT7	1.11571
ARSE	1.11503
PLAC9	1.11483
GBP1	1.11474
MLPH	1.11433
BOK	1.11384
TTTY15	1.11379
MMP14	1.11344
GVIN1	1.11339
TNFSF11	1.11288
HLA-DMB	1.1123
GUCY1B3	1.11169
TGIF2	1.11097
C19orf76	1.11042
TTYH3	1.11037
CHP2	1.11003
S100A11	1.10983
LBP	1.1095
SPINK6	1.1091
TNNI2	1.10892
LRRC15	1.1088
ADCY4	1.10869
LOC100233209	1.10862
C20orf107	1.10833
NTN5	1.10824
TMEM92	1.1075
ALPK3	1.10619
CPZ	1.10616
BOC	1.1059
LAD1	1.1059
GJA4	1.10546
NLRP1	1.1054
SCIN	1.10523
SEMA3C	1.1049
CXCL12	1.10398
EIF4EBP1	1.10383
TNFRSF8	1.10383
SERPINB9	1.10288
PDE1B	1.10258
COL16A1	1.10232
EMR4P	1.1019
C7orf61	1.10159
ZBED2	1.10055
GPR173	1.09983
PKN3	1.09971
CFH	1.09887
TEX15	1.09855
DLL1	1.09785
ERMN	1.09698
PRR5L	1.09636
HSPA7	1.09586
DISP2	1.09579
XCL2	1.09568
MMD	1.09559
SLC9A3R1	1.09521
MECOM	1.09448
HEY2	1.0932
IGFBP3	1.09316
NOTCH1	1.09294
ITGB3	1.09255
DLL4	1.09194
DUSP2	1.0901
PTGIS	1.09003
CSRP2	1.08964
ECSCR	1.0894
C6orf145	1.08816
GJA5	1.08805
LOC151534	1.08733
SLC2A10	1.08677
GPR162	1.08595
UBASH3B	1.08529
PIK3CG	1.08526
USH1C	1.08407
NTM	1.08361
ZNF439	1.08338
FCRL3	1.08292
MDK	1.08225
C22orf34	1.08177
PYCR1	1.08127
GPR109A	1.08067
NEU4	1.08055
KCNG2	1.07979
TMEM121	1.07929
FRMD4A	1.07924
OBSCN	1.07874
CNN1	1.07811
PADI4	1.07762
SLA2	1.07712
KIAA1211	1.07604
WNT10A	1.07594
CABP4	1.07548
RTN4RL2	1.075
LPPR3	1.07492
FGD5	1.07489
OTX1	1.07456
CDH10	1.07391
MFSD2B	1.07318
SMTN	1.07262
GDF6	1.0722
PLA2G2A	1.07212
THEMIS	1.07059
EGR4	1.06927
HTRA3	1.06917
OR51E1	1.06905
HSPB2	1.06855
S1PR5	1.06853
CTSS	1.0681
PAPLN	1.06794
CYorf15A	1.0676
CADM3	1.06756
TNFRSF19	1.06727
CPNE2	1.06639
AQP2	1.06624
ALPK2	1.066
RTP4	1.06582
RHOJ	1.06578
COLEC12	1.06576
GPR161	1.06483
CCDC19	1.0648
LOC388242	1.06407
TK1	1.06382
ARHGAP4	1.0634
ATP6V1B1	1.06298
SIGLEC9	1.06276
MEOX1	1.06121
PRR5	1.06118
IGFBP7	1.06035
MGC12916	1.06019
GPR68	1.05998
HRNBP3	1.05992
PGF	1.05985
AQP3	1.05982
EGR2	1.05976
CALY	1.0596
DACT3	1.05909
FAM24B	1.05906
MGMT	1.05888
TJP3	1.05877
CAPN11	1.05852
NOTCH3	1.05754
KCNE3	1.05738
CRISPLD1	1.05671
HSD11B1	1.05623
SOX18	1.05532
MRGPRF	1.05486
FOXS1	1.05482
KIF19	1.05463
ITGB1BP2	1.0542
TMC4	1.05385
XIRP1	1.0528
GCNT2	1.05222
VWA1	1.05211
VCAM1	1.05202
SIGLEC16	1.05108
SNAI2	1.05095
RPL39L	1.05041
NOXO1	1.04995
CEACAM4	1.04985
CECR6	1.04977
NDN	1.04902
ATAD3C	1.04891
CRLF1	1.04849
BCL6B	1.04787
PCDHA7	1.04764
MLKL	1.04687
GPR39	1.04671
TFPI	1.04641
PCDHB6	1.04629
MYO15B	1.04471
DUSP5P	1.04395
SYTL3	1.04365
ADAM8	1.04363
CCL11	1.04335
ACTG2	1.04293
GIPC3	1.04279
CHD5	1.04257
LOC100240734	1.04223
ARPC1B	1.04164
LOC283731	1.04104
PYROXD2	1.04068
SH3BP2	1.04013
CD226	1.03995
PSTPIP1	1.03979
ZNF135	1.03951
PRG4	1.03927
CLEC4A	1.03849
KIF12	1.03821
TLR10	1.0376
A2M	1.03737
ARHGEF2	1.03655
KLRC2	1.03625
TRPC6	1.03609
IGFBP6	1.03562
ICAM2	1.03547
GRIN3B	1.03495
PDGFRL	1.03437
LRFN4	1.03416
ZNF788	1.03407
ZNF257	1.03395
CBR3	1.03383
USHBP1	1.03374
SHD	1.03321
CNTNAP1	1.03316
CAV1	1.03247
CACNA1C	1.03246
SLC16A4	1.03243
ARHGEF16	1.03184
LOC374443	1.03131
IFNG	1.03126
FAM27C	1.0311
AKR1C1	1.0308
WNT7B	1.03076
TIE1	1.03056
ZNF833	1.0303
UNC93B1	1.0302
TEAD2	1.03009
SSTR2	1.02992
SYNGR3	1.02929
JAKMIP1	1.02929
C9orf109	1.02862
BCAT1	1.02825
DKFZP434L187	1.02597
ELANE	1.02539
BAIAP2L2	1.02523
CYP1B1	1.02466
RHBDL2	1.02411
TMEM91	1.02381
DUSP27	1.02271
TTYH2	1.02232
AQP1	1.02197
HSPA12B	1.02184
GIMAP6	1.02173
ETV7	1.02092
FAM167B	1.02082
KIAA1755	1.02072
KIRREL2	1.02071
LMCD1	1.02066
P2RY12	1.02005
C2CD4C	1.01942
DHRS3	1.01933
ITPKB	1.01846
CCDC102B	1.01776
GYPE	1.01766
VPS37D	1.01706
CNIH2	1.01687
DPEP1	1.01673
KIAA1257	1.01658
HLX	1.01622
PBX4	1.01562
CA12	1.01541
CASQ2	1.01538
GPIHBP1	1.01501
FRMD4B	1.01495
PRRG2	1.01411
NDUFA4L2	1.0139
LOH3CR2A	1.01374
SH3BGRL3	1.01308
GCK	1.01289
RFPL3S	1.01255
S100A6	1.01246
LOC283867	1.01241
APOC2	1.01178
KCTD15	1.01056
SEMA5B	1.01045
APC2	1.01024
RHOXF1	1.01006
ITGA6	1.00953
CD1E	1.00934
PRRT4	1.00853
SPNS2	1.00837
PCDH12	1.00779
TGM2	1.00731
ST6GALNAC3	1.00723
SLC38A3	1.00711
CREB5	1.00706
SAT1	1.00661
ARC	1.00646
ESAM	1.00646
EDNRA	1.00621
PHLDA1	1.00586
GPX7	1.00578
HOMER3	1.00537
TIFAB	1.00523
ADRA2A	1.00498
HOXB8	1.00292
FAM38B	1.00246
ZFP36	1.00244
ASPN	1.00198
SH2D3C	1.00126
CYP2E1	1.00098
GPR109B	1.00097
LOC100129055	1.00085
TSPAN32	1.00048
ACVRL1	1.00015
CYSLTR1	0.99911
GDPD3	0.999053
LRRC70	0.999047
MYBL2	0.999034
NR2E3	0.999012
KIR2DL4	0.998886
NYNRIN	0.998651
BID	0.998517
THBS3	0.997588
DCHS1	0.997436
RHOV	0.997256
ADCY5	0.997036
IL24	0.996242
RASGRP3	0.996242
NOD2	0.996189
KLRF1	0.995527
ZNF22	0.995486
SPOCD1	0.994876
TMEM35	0.994726
TP53I11	0.994449
CCDC88C	0.993662
TBX1	0.993501
MYEOV	0.993253
IPW	0.993104
TNFAIP2	0.992967
UBE2C	0.992451
RGL4	0.991426
TEAD3	0.990834
TNFRSF21	0.989998
GMIP	0.989713
VGLL3	0.989595
ADAMTS4	0.989084
FOSB	0.988378
CMTM3	0.987989
TMEM195	0.9879
PDGFB	0.987839
C10orf47	0.987811
LAIR2	0.987017
SHF	0.986912
PGA3	0.986905
PRKCG	0.986667
CASP5	0.985968
IER3	0.98534
PAR-SN	0.985275
C10orf81	0.985186
SRPX2	0.985166
ZPLD1	0.985037
ABCB5	0.984456
RARRES1	0.983288
HOXD1	0.983001
TUBB6	0.982601
SOX7	0.982018
ADA	0.981717
LRRC39	0.981636
GPR97	0.981199
MMP7	0.980916
IER5L	0.980323
TDRD10	0.979282
CXCL2	0.978221
C10orf25	0.978094
SYCE1	0.978019
SEMA3G	0.977071
LOC654342	0.977009
GYPC	0.976567
MYCL1	0.97634
DLX4	0.974849
S100A2	0.974429
FAM176A	0.974248
DKFZp566F0947	0.974216
LOC654433	0.972398
ENPEP	0.972276
RAB17	0.971888
TGFB2	0.971813
CXCR2	0.971508
EFEMP2	0.971447
CXCR7	0.970789
KLC3	0.970483
RGMA	0.970219
TAGLN	0.96899
CGB7	0.96638
P2RX5	0.966236
TMEM88	0.966212
MPO	0.966185
FOXD1	0.965301
ETS1	0.9651
TNFAIP8	0.964909
SHISA2	0.964672
FAM90A1	0.964644
NAT8B	0.964354
CACNA1F	0.964151
TRPC4	0.964094
NID1	0.96348
C19orf59	0.963172
NOD1	0.962112
ST6GAL1	0.96152
IQCA1	0.961388
NLRC4	0.961263
FAM196A	0.960802
PTH1R	0.95994
NPR1	0.959671
SSC5D	0.95961
SPP1	0.958809
LOX	0.958253
GIPR	0.95791
IRF1	0.957855
CDC42EP2	0.957125
RINL	0.955928
ITGB4	0.955907
LOC100188949	0.95548
AFAP1L2	0.954932
ARHGAP31	0.95446
NPFF	0.954208
ARRDC2	0.953641
FGF5	0.95335
ANO2	0.953248
PTAFR	0.953079
LHB	0.952858
PCDHB4	0.95259
RELB	0.951903
RHEBL1	0.951186
RAMP2	0.951168
GPR3	0.951116
TMEM200A	0.950319
PLB1	0.949928
LTC4S	0.949897
ADM	0.949432
SEMA6C	0.948383
RASSF6	0.947477
APOL1	0.94742
EYA2	0.947417
CRISPLD2	0.947274
CA1	0.947065
ITM2C	0.946558
DPEP3	0.946473
PROCA1	0.946165
APCDD1L	0.945612
PSMB9	0.945557
TRIM22	0.944616
DRD4	0.94451
LOC100132354	0.943352
ANKRD30B	0.942644
TMEM215	0.942536
RASA4	0.942351
FLNC	0.942248
GPX3	0.942051
HIST1H4J	0.942042
DNM1	0.940972
ELMO1	0.940624
ARL9	0.940559
NFKBIZ	0.940261
CCDC106	0.939906
PIF1	0.939772
RASL12	0.939596
BIRC5	0.93946
ZNF578	0.938901
HES2	0.938757
ZNF385D	0.938473
C6orf41	0.938168
STON1	0.937945
SNHG12	0.936949
LOC158376	0.936044
C1orf200	0.935712
MYCN	0.935559
LAMA4	0.935454
VGF	0.934787
CH25H	0.934741
COL10A1	0.934588
IL32	0.934262
NPAS1	0.934233
ANG	0.934186
DBNDD2	0.934072
DOK6	0.933545
AQP5	0.933438
FAT1	0.933042
GRIN2A	0.932734
VGLL2	0.932622
TSPAN2	0.93212
NFATC1	0.932056
HBA1	0.930631
ADH1C	0.930516
TNS3	0.929627
TOX2	0.92954
DCHS2	0.929486
MAL	0.928763
RPLP0P2	0.928754
SLC9A3R2	0.928509
LGR6	0.926853
ZBTB32	0.926631
CDON	0.925886
HAND2	0.925722
TMEM132E	0.924488
NMU	0.923876
DENND1C	0.923529
HIST2H2AC	0.923106
PLVAP	0.922795
ZYX	0.922442
TARP	0.922065
CNRIP1	0.92159
PDZD2	0.921587
IRAK3	0.921066
PROK2	0.920663
TMEM155	0.920509
CAPN12	0.920268
DUOXA1	0.920189
ALDH1A3	0.919927
IL20RB	0.919523
C2CD4B	0.91793
PPDPF	0.917913
LITAF	0.917832
STARD8	0.917721
ADCY7	0.917715
LEPREL2	0.917413
ASAM	0.917186
AG2	0.916659
KISS1R	0.916099
MUC5B	0.914384
GAS5	0.914379
VEGFC	0.913763
FAM131B	0.913727
SEMA3A	0.913557
DZIP1L	0.912441
AIM1	0.912362
CHST7	0.912268
SH2D4B	0.91153
LAYN	0.911037
DNM1P35	0.910432
GSG1L	0.910039
STAC2	0.909944
PROK1	0.909758
MTHFD2	0.909505
ZDHHC11	0.909282
NR4A2	0.909221
RNASE4	0.909106
ENTPD2	0.90898
STC1	0.908503
PIPOX	0.908415
GUCY1A3	0.907577
SLFN11	0.907562
EFHD1	0.906653
EMR3	0.906413
CDC42EP3	0.906337
MST1R	0.906104
CERCAM	0.905557
PDGFRB	0.905284
LOC388588	0.90494
FLJ42875	0.904885
PITX2	0.904812
MMP12	0.904636
EPHB3	0.904513
TRPC2	0.904101
NXF3	0.903701
LRRN1	0.902557
LOXL1	0.901926
EYA1	0.90159
JUP	0.901397
UCP2	0.90099
PLD2	0.900763
IL4I1	0.900529
SLC18A2	0.900131
S100A14	0.899672
CCDC3	0.899562
VIM	0.899537
AFAP1	0.899285
ZNF883	0.898324
FBXO17	0.898125
HBQ1	0.897801
APBA1	0.897342
RND1	0.896996
XAF1	0.896186
GNB4	0.895346
SEMA3F	0.895222
KIF2C	0.894854
BEGAIN	0.894128
IL1RL1	0.894014
SH2B3	0.893909
TMEM173	0.893638
KCNN3	0.893445
FGB	0.8929
LAT	0.892799
GATA3	0.892718
TCTEX1D1	0.892595
CLEC2L	0.892229
TMEM37	0.891943
C6orf115	0.891744
MFSD10	0.891716
NPM3	0.89142
LOXL4	0.891122
BLK	0.890905
SLC7A10	0.890683
RRAD	0.890327
RPS18	0.890296
CHAC1	0.890277
CCDC109B	0.890156
ASPHD2	0.890102
TBX18	0.889544
GEFT	0.889484
PDE1A	0.888288
LRP1	0.88695
FOLR3	0.886471
PRG2	0.886221
FAM198A	0.886217
EHBP1L1	0.886048
PRAP1	0.885963
HIC1	0.885781
CLEC3B	0.88443
KIAA0040	0.883874
HIST1H2BH	0.883495
SYT5	0.883406
NCR3	0.883376
RPL27A	0.88312
VAX2	0.881623
CD163L1	0.881305
MAF	0.881297
TIAM1	0.881253
JPH4	0.880792
PLEKHB1	0.880025
PLEKHA6	0.879998
LOC100240735	0.879638
B3GAT1	0.879321
C14orf34	0.878915
FUT3	0.878694
NGFR	0.878557
FCRL2	0.878077
ISG20	0.877796
LTBP4	0.877755
C6orf48	0.877379
PIWIL1	0.877309
SPRY1	0.87658
TYRP1	0.875908
MCART6	0.875885
NKX2-1	0.875803
PIGR	0.875658
GHRL	0.875341
CAPN6	0.874555
NUDT1	0.874469
AFMID	0.874288
BMF	0.874151
GNG11	0.874068
TM7SF4	0.873553
ASB2	0.873535
ROBO2	0.87316
PCDHB7	0.871949
DLL3	0.871803
NR4A1	0.87166
TSPAN15	0.871526
CCL2	0.871386
TIMP1	0.870512
SLCO1C1	0.870057
TXNDC3	0.870039
MFSD7	0.869612
KLK1	0.86933
SNX22	0.868928
P2RX1	0.868734
GPR35	0.868637
DOCK11	0.86851
ADAM15	0.868452
PCDHA1	0.867403
NEK6	0.867258
MYO1B	0.867237
SFTA1P	0.867017
RILPL2	0.866802
CLDN14	0.866597
BLNK	0.866417
HUS1B	0.866185
FBXO39	0.865885
AKR1C2	0.865334
RPL11	0.865079
TGFB1I1	0.865056
CXCR5	0.864459
ERG	0.864459
F5	0.864061
TEK	0.863825
ZFY	0.863566
PYGL	0.862949
CYTH4	0.862739
CD40	0.86264
PLEKHG5	0.862608
C10orf116	0.862566
PTCRA	0.862317
S100A12	0.86211
C17orf72	0.862007
HAL	0.861934
HHIPL1	0.861856
CLEC4D	0.861608
TMEM180	0.861497
RAD54L	0.861477
NAT8L	0.861163
HLA-F	0.860987
PIGZ	0.860663
ARHGDIG	0.860562
AZU1	0.86042
OBFC2A	0.860174
CEBPD	0.859998
MAD2L2	0.85978
JSRP1	0.859705
DKKL1	0.85942
ZNF676	0.859047
SAMD5	0.858931
TREM1	0.858897
TNFRSF17	0.858865
IRX4	0.858803
GBP6	0.858704
SHANK3	0.858571
ITGBL1	0.858158
CD200	0.857864
HTN3	0.857595
RAB15	0.857502
ACCN2	0.857055
FAM177B	0.856811
STMN1	0.856327
ANKRD34A	0.856293
LIME1	0.855785
NTF4	0.855578
CYP4X1	0.855449
LY6K	0.8552
STXBP6	0.855173
BNC1	0.85517
XKR8	0.854994
C21orf63	0.854402
HCG11	0.853491
MMEL1	0.853448
TROAP	0.853168
CYP27A1	0.852785
NPM2	0.85239
SRCRB4D	0.852304
TEKT3	0.852289
CLIC2	0.852132
TMPRSS15	0.851809
NTNG2	0.851545
HOXB2	0.851034
CBS	0.850917
TBX19	0.850864
SVEP1	0.850633
LCNL1	0.8502
NKX2-2	0.85004
B3GNT4	0.850022
SDS	0.849078
CKM	0.848727
LHX6	0.848193
CA7	0.848132
DIO2	0.847867
GPNMB	0.847751
SYDE1	0.847747
FHL1	0.847346
S1PR2	0.846922
RUSC1	0.846224
RSPH9	0.84586
FGF14	0.845853
CHL1	0.845675
ZNF804A	0.845228
GALNTL4	0.845075
KCNC2	0.84469
PLEKHA4	0.84424
FSCN1	0.844014
ANKRD2	0.844004
NFKBID	0.843079
CCL17	0.84245
APOBEC3A	0.842061
EPHA2	0.842001
GALK1	0.841941
LPCAT4	0.841915
PKIA	0.841764
IKBKE	0.841594
SPATA8	0.841517
PLOD1	0.84083
ANXA11	0.840659
RETN	0.840527
CCL14	0.840416
NSUN7	0.839229
LOC401463	0.839192
RNF125	0.839047
EFHC2	0.839025
SNHG3	0.838822
TBC1D3C	0.838736
F11	0.838575
SORCS1	0.837528
PCDHB17	0.837449
PUSL1	0.836567
HOPX	0.836273
FBXO27	0.836236
KIF7	0.835986
TMSB4Y	0.835824
LEFTY2	0.835679
ENG	0.835507
CD44	0.835468
CDA	0.835115
TPM2	0.834545
TRO	0.834502
LTA	0.834322
LGALS12	0.834091
C6orf147	0.833745
PCDHB16	0.833727
GAS6	0.833582
TIAF1	0.833487
ARHGAP27	0.833445
ZNF683	0.833289
PAG1	0.832787
IL33	0.832631
CECR1	0.832553
HGD	0.832415
FILIP1L	0.832194
CDK18	0.831727
LOC400759	0.831573
LTBP1	0.831352
[truncated: 18,504 more rows]

## Sheet: BLCA
GeneSymbol	logFC
CLCA2	2.15637
KRT23	2.11929
CAPNS2	2.03651
SERPINB13	2.01741
MMP13	1.96928
GPX2	1.94249
CLCA4	1.87098
SOX21	1.84879
CHP2	1.83773
LY6D	1.82059
SLC1A5	1.81439
GJB5	1.7967
UGT1A10	1.78175
C1orf161	1.77659
CALML3	1.77078
KRT16	1.71957
GSTM1	1.7104
CYP24A1	1.70226
GJB4	1.68419
KRT4	1.64019
SERPINB3	1.61888
SLC6A2	1.57715
KRT6A	1.55532
AKR1C2	1.55503
ALDH3A1	1.55217
FGFR3	1.53377
FAM83C	1.52169
KRT5	1.52162
UGT1A7	1.5136
IVL	1.5093
S1PR5	1.49714
CEACAM6	1.47803
CEACAM5	1.47771
UGT1A9	1.45248
S100A9	1.44628
TSPAN1	1.4448
FAT2	1.44178
TP63	1.43085
ADH7	1.43029
WNT7A	1.42946
POU3F1	1.42342
MAGEA6	1.41163
UGT1A6	1.40646
ZNF488	1.38307
AADAC	1.37492
TMPRSS4	1.37489
KRT13	1.37241
SERPINB4	1.33951
TNS4	1.33946
AKR1B10	1.33227
FAM83A	1.31368
DSC3	1.31138
PADI3	1.30033
CSTA	1.29714
ALDH1L1	1.28571
AKR1C1	1.27532
ADRB1	1.26918
NLRP7	1.26895
HES2	1.26476
CYP27C1	1.26089
ZIC2	1.25924
LGALS7	1.25853
ANXA8	1.24977
CLDN8	1.24434
SPRR1B	1.22921
CST1	1.22664
FADS6	1.21185
C10orf99	1.20524
FGFBP1	1.20195
LYPD3	1.19995
GYLTL1B	1.19627
CLDN1	1.1942
UGT1A8	1.1889
LOC642587	1.18537
KRT31	1.18405
PCP4L1	1.18089
EYA2	1.16972
TRIM29	1.16553
TNNT3	1.1638
MAGEA3	1.16188
DEFB1	1.15974
SLC1A6	1.15527
SNX31	1.1413
GJB3	1.13613
RAET1G	1.13442
FABP4	1.13429
LGALS7B	1.1325
ANXA8L2	1.13038
PKP1	1.11458
KRT6C	1.10462
NTF4	1.09019
DSG3	1.08322
KRT15	1.08318
FBXO27	1.07201
CYP4F11	1.06742
SERPINB5	1.06451
DUSP9	1.06317
GPR109A	1.05622
FZD10	1.05302
VAV3	1.05267
BBOX1	1.05171
TPRXL	1.04777
DKK4	1.0421
C12orf59	1.0402
CYP2S1	1.03825
FAM181B	1.02799
DUOX2	1.02472
BTBD16	1.02399
ABCA12	1.02005
CPA4	1.01439
SLC7A5	1.00793
IL20RB	1.00238
PLCH2	0.990649
DLK2	0.986165
CES1	0.98614
GPR109B	0.978789
TMEM40	0.978747
CKMT1A	0.973725
MSMB	0.96937
DUOXA2	0.959464
SFN	0.958819
C11orf53	0.953467
CEACAM7	0.950487
WFDC5	0.948927
EDAR	0.948699
LPAR3	0.948356
C2orf54	0.946414
PTPRZ1	0.936963
ALPP	0.935995
MMP1	0.935391
P2RY2	0.93303
ZIC5	0.931131
C16orf74	0.927502
MMP12	0.926599
KRT6B	0.924281
LASS3	0.924039
SPRR3	0.922591
KRT14	0.916015
HOXC13	0.914763
FSTL4	0.913891
FOXN1	0.912301
C12orf54	0.906588
PGLYRP3	0.904459
PADI1	0.899529
EPHX3	0.893214
PRODH	0.893106
KCNN4	0.891456
LOC201651	0.888963
HAS3	0.888696
CGB7	0.888024
SOX2	0.887838
CLU	0.877209
SOX15	0.877197
MME	0.872539
WNT10A	0.871645
FXYD3	0.871632
PGLYRP4	0.870695
CALML5	0.867299
KRT77	0.864972
MYCL1	0.864274
EPS8L3	0.864124
ESPN	0.859737
PVRL1	0.856497
ABCA4	0.854944
BMP3	0.851793
USH1G	0.850769
KRT17	0.847572
TFR2	0.844108
BTBD11	0.843267
ACE2	0.842122
SCGB1A1	0.840602
CALHM3	0.838293
NOTUM	0.838088
OLFM4	0.838014
CST4	0.83661
GSTM2	0.835966
CEBPA	0.826701
SLITRK6	0.824332
ELMO3	0.821477
RAPGEFL1	0.819936
SLC2A9	0.819849
LOC441869	0.819443
HOXD11	0.817517
PIR	0.817417
GRIN2D	0.812254
MYEOV	0.811768
RPTN	0.811624
SIX2	0.810431
ASCL2	0.806989
TUBA4A	0.805496
MMP28	0.802796
GPR110	0.801801
LOXL4	0.800673
EDARADD	0.797721
SDC1	0.788881
KRT3	0.783424
S100A8	0.779797
PYGL	0.779717
C3orf54	0.778866
CA12	0.778573
FERMT1	0.771986
SLC13A4	0.771114
FABP5	0.77051
PANX2	0.766179
PPM1N	0.764481
MS4A15	0.763092
SLC47A2	0.760647
GSTA1	0.755581
CKMT1B	0.754144
SPRR1A	0.752903
GPR87	0.752875
MUCL1	0.749232
ZNF750	0.748091
TNFSF10	0.74661
FAM84A	0.745935
GSDMC	0.745857
CEL	0.743394
CYP2W1	0.74241
ITGB4	0.741748
MAGEA1	0.739269
MFSD2A	0.73668
CLCN1	0.733817
C10orf55	0.732011
F12	0.724126
SNCG	0.72399
TFAP2A	0.72366
BMP7	0.721834
ARL4D	0.720512
S100A2	0.72051
HR	0.716524
PYCR1	0.7162
WNT5A	0.716121
SLC7A4	0.713572
SLC7A11	0.711691
SLC2A1	0.709952
C20orf134	0.709529
RNF39	0.70836
B4GALNT3	0.707731
CDC42EP5	0.707337
LRP8	0.704586
SRRM3	0.702183
CES4	0.701012
S100P	0.70057
WNT4	0.699255
UPK3B	0.698126
DOK7	0.696167
CYP3A7	0.695409
KRT74	0.695236
COL7A1	0.694601
LGR6	0.694032
RIPK4	0.69175
DUSP13	0.691716
GCLM	0.689574
DUOXA1	0.68808
KLRG2	0.687661
SERTAD4	0.68694
RAET1E	0.686713
EPHA1	0.686407
TINAGL1	0.685872
ALG1L	0.684118
HSD17B3	0.683415
SYT8	0.682878
CXCL17	0.682803
SHROOM2	0.681361
TNFSF12-TNFSF13	0.681021
CECR2	0.678618
AKR1C3	0.678157
KRT1	0.677765
LYPD2	0.676752
PHEX	0.675818
SLC40A1	0.672968
DAPL1	0.672337
SCARA3	0.669176
CELP	0.667439
TRIM7	0.666988
DHRS9	0.666096
LRP4	0.665427
FSCN1	0.660991
KLK8	0.660633
MUC2	0.660341
ZNF385A	0.659015
KRTAP5-9	0.657625
FOXL2	0.656301
G6PD	0.654716
FAM110C	0.653137
ISYNA1	0.651974
FAM183A	0.651815
BCAS1	0.65156
MPZL2	0.650807
PLA2G4F	0.64969
SPRR2D	0.64951
SPP1	0.648705
SLC5A5	0.647343
MKRN3	0.646939
SH3BP1	0.645262
LAMB3	0.644381
RBP3	0.644124
GPR115	0.643406
DMBX1	0.642372
TMEM105	0.642209
DNAJB3	0.641371
BST2	0.640764
PROM2	0.638458
PLAU	0.638028
KRT19	0.637499
OLR1	0.63668
GDPD2	0.634955
FGFR2	0.634837
EVX1	0.633107
ERMP1	0.632457
ABCC2	0.632409
SYT1	0.63214
CBLC	0.630121
CD1A	0.62988
RNF128	0.627983
CD82	0.626583
ABO	0.626129
MAGEA2	0.624657
PPP1R13L	0.624383
GJB2	0.624219
PGD	0.623842
ARTN	0.623681
ANXA10	0.621013
ALPPL2	0.620652
SERINC2	0.620363
AIM2	0.617889
LOC284379	0.615665
RHBDL2	0.615434
C1orf110	0.615271
C10orf91	0.615112
TRIM31	0.61482
BARX2	0.61408
AIM1L	0.613529
NCCRP1	0.61267
FOXE1	0.612564
DQX1	0.612515
PKP3	0.611665
AKR1B15	0.610021
HSPB1	0.609709
B3GNT8	0.607031
CITED4	0.606881
OPLAH	0.606157
SOST	0.606028
FOXA3	0.605701
WDR72	0.602894
SCARB1	0.602807
GSTM3	0.601857
HGD	0.601401
CLEC2B	0.600935
KREMEN1	0.599863
CBR3	0.598091
CYP4F3	0.597319
ZG16B	0.597283
SYTL1	0.596979
CP	0.596888
C19orf33	0.596302
DHCR24	0.595592
MMP10	0.594607
NQO1	0.594411
ABCG1	0.593523
FAM181A	0.592028
EPHX1	0.590884
ST6GALNAC1	0.589653
NRARP	0.589515
BAIAP3	0.588675
ITGA6	0.588272
RHCG	0.587714
METRN	0.58744
RPL13AP3	0.584979
TTC22	0.584442
NAPSA	0.584056
TPST2	0.583799
FGF3	0.582782
SPERT	0.582728
ANKRD2	0.581598
CLIC3	0.58124
MUC20	0.581176
OSGIN1	0.580793
CNTD2	0.580709
GPC1	0.580327
NHLH2	0.580167
LPCAT2	0.576775
SLC39A2	0.576737
CELSR1	0.576495
SERPINB11	0.576332
VWA2	0.576037
COL10A1	0.575885
F5	0.575644
NKX2-8	0.575248
COL11A1	0.575085
CDH8	0.574952
UGT1A3	0.573789
PLAG1	0.573488
CTAG2	0.573481
DSP	0.573247
S100A7	0.573063
PRNP	0.572909
PRRG2	0.572596
MYLK4	0.570745
CD44	0.570034
WNT3A	0.566581
CLDN16	0.56325
GKN1	0.560698
SLC3A2	0.560623
SBSN	0.560184
GPR98	0.559973
ETHE1	0.558702
ZNF296	0.558649
AGMAT	0.557956
LRMP	0.556711
APOC2	0.555732
TSIX	0.554493
TREM2	0.552897
SULT2A1	0.552724
TSKS	0.55119
ADAMTS20	0.550162
PLAC8	0.550081
FOXL1	0.549702
VSNL1	0.549255
RHOV	0.547366
SEMA4B	0.545462
TKT	0.545396
HOXC8	0.544265
MAGEA4	0.542945
NXPH4	0.542206
IRS1	0.541864
AHNAK2	0.541312
HMGA1	0.540989
KHK	0.54054
CTSH	0.540278
GPR157	0.540209
PCDH7	0.53937
ATP1B3	0.539142
GSTT1	0.538914
FGF19	0.538269
CIDEA	0.537722
TBC1D2	0.536524
OAT	0.536284
TG	0.53575
NUDT4	0.535363
MAOA	0.534584
SPINT2	0.534139
C21orf15	0.533784
TRPV4	0.533745
DUOX1	0.533702
SIX1	0.532614
AFAP1L2	0.532119
TMEM45A	0.531731
IL17RE	0.530551
PTK6	0.530404
FAM83F	0.529906
SHH	0.529764
BMP8B	0.529692
S100A16	0.52904
GPNMB	0.52821
NKPD1	0.528202
KPRP	0.526594
MDFI	0.525883
SLC9A3R1	0.524524
MAGEA12	0.524266
ALDH3B2	0.523831
HS3ST6	0.522939
TSKU	0.522904
KRT78	0.521875
SIGLEC12	0.521798
ANXA8L1	0.519092
GSTM4	0.518998
TACSTD2	0.518402
KRT24	0.517035
ARL4A	0.516831
RASSF6	0.51665
B3GNT3	0.516287
CYP2J2	0.515837
GABRA3	0.515835
ANKK1	0.515763
LIPE	0.515577
LOC100131726	0.51462
KRTAP5-8	0.51348
PI3	0.512964
GSTP1	0.512506
SLC2A5	0.510835
LGR5	0.510339
KRT36	0.509937
TCHH	0.508165
RIN1	0.507962
LOC286467	0.506806
PPFIA3	0.505786
LOC400696	0.50492
SORL1	0.502678
GPR56	0.501684
AMN	0.501363
HPDL	0.500446
UCN2	0.500282
S100A14	0.500255
C9orf125	0.500217
PHLDA3	0.499455
MFSD2B	0.498817
CD9	0.498255
RDH16	0.498207
RNF152	0.497654
ABCC5	0.495886
IGFBP3	0.495823
SLC47A1	0.495366
CXCR7	0.493582
GALNT6	0.493158
LOC92659	0.492868
ATP6V0A4	0.492615
GCHFR	0.491731
SMAGP	0.491239
SULT2B1	0.491143
CBR1	0.490615
UPK3BL	0.489749
EFNB1	0.489487
REEP4	0.488912
KAZALD1	0.488585
ITGA2	0.487927
PTPRR	0.486616
RASSF10	0.485955
IL20RA	0.485918
LOC80054	0.485699
CLEC2L	0.485315
DEGS2	0.484389
ECE2	0.483455
CA11	0.483168
KREMEN2	0.482942
SERPINB2	0.482866
COL4A6	0.482221
TSPAN8	0.481548
TBX6	0.481489
SDS	0.480622
MRPS12	0.480564
KRT27	0.480422
PROC	0.480359
RPL9	0.479937
SRXN1	0.479645
ANXA1	0.479018
GABRE	0.47782
SCPEP1	0.477448
JOSD2	0.477295
EXOSC5	0.477177
TCN1	0.476482
FCHO1	0.475356
SNAI2	0.474833
TMEM90B	0.474112
WNT11	0.472933
BLCAP	0.472848
DHRS3	0.472127
SLC15A2	0.470978
ENTPD7	0.470275
P2RY1	0.47026
ZSCAN5A	0.469893
MCTP2	0.469107
IGSF3	0.468411
GSTM2P1	0.467772
SLC37A2	0.467165
TP53AIP1	0.466652
ISM2	0.465918
CDH3	0.465463
DHRS13	0.465389
PERP	0.46478
DLX1	0.464632
GPR172B	0.464401
BLVRB	0.463714
GJB7	0.463704
TNKS1BP1	0.463599
IRF6	0.46268
TNNI2	0.462184
LOC219347	0.46174
PTPN13	0.461439
SCD	0.461154
AQP3	0.460775
GUCA2A	0.460209
PAX9	0.459815
CSAG1	0.459128
ARSI	0.45835
TMED7-TICAM2	0.457342
LYPD6B	0.456422
BCAM	0.456101
CCR3	0.45532
HS6ST1	0.455266
MNX1	0.455049
XG	0.455044
ZBED2	0.454732
STARD5	0.454536
HOXA13	0.45366
RAB38	0.453628
EN1	0.453486
GJB6	0.453451
ANO1	0.453278
SPDYC	0.453211
PSAT1	0.453135
ALDH16A1	0.452148
CYB5R1	0.451985
CCDC61	0.451882
LY6G6D	0.451548
GLS2	0.4514
C21orf63	0.451074
KRTCAP3	0.448656
AGR2	0.448368
CARD10	0.448316
FASN	0.4483
GRIN3B	0.44824
MYH14	0.448081
HSPB3	0.447129
TOMM40	0.446932
HTRA3	0.446623
CREG1	0.446021
VDR	0.445771
RASAL1	0.44553
MT1X	0.444119
WNT16	0.442446
JUB	0.442353
SLC7A1	0.44197
DCXR	0.44189
LDHD	0.441696
THEM5	0.441327
SPR	0.441211
FOXC1	0.440839
BCL2L10	0.440346
ULBP2	0.440142
MAGEB2	0.439748
BCAT2	0.439116
TFRC	0.438919
PLAT	0.438172
ISOC2	0.437676
THBD	0.43715
LEFTY1	0.435971
SEPW1	0.435494
ALDH1A3	0.435461
RPS27	0.435104
FAM83B	0.434713
TSPO	0.434621
IL1RAP	0.434593
DPEP2	0.434297
SLC29A2	0.434276
SLC16A5	0.434191
PRDX1	0.43265
LOC100271831	0.43261
CDH26	0.432147
KCNJ15	0.431391
HOXA1	0.431366
C17orf99	0.430849
KRT33A	0.430738
SRPX2	0.430627
SEMA3F	0.429995
ZSCAN5B	0.429176
BRI3BP	0.428622
SERPINB7	0.428164
LRRC15	0.427932
CHST11	0.427643
EPHA2	0.427167
PRRG4	0.42685
JAG1	0.426301
FTL	0.426047
GRP	0.425683
LIMA1	0.424818
PLA2G2F	0.424706
CYP2B7P1	0.42429
VSIG10L	0.42425
HOXC11	0.423988
ABCB11	0.423319
PLEKHG4	0.423287
TNFRSF1A	0.422828
ABCB6	0.422822
EML2	0.422685
COMT	0.422665
AKR7A3	0.422634
FLJ45445	0.422459
TCHHL1	0.42226
LPCAT3	0.422242
AP2S1	0.421968
CD3EAP	0.421799
PGAP1	0.421588
ABAT	0.421002
TRAPPC6A	0.420762
LPAR1	0.419541
PTK7	0.419372
PTHLH	0.419176
ITPRIPL2	0.419056
C9orf140	0.418811
PCOTH	0.41856
KRTDAP	0.418544
NCOA3	0.418155
ENDOD1	0.417729
FAM83D	0.417717
PTPRU	0.417646
LAMA5	0.417167
EVPL	0.416547
HPGD	0.416108
STX19	0.416072
IRX5	0.415959
C21orf129	0.415275
C1orf177	0.414818
KRTAP4-1	0.414628
SDCBP2	0.41461
SDR9C7	0.414415
LIPK	0.413918
NBL1	0.413824
MLXIPL	0.41354
RAPGEF3	0.413233
TMEM117	0.412445
WNT5B	0.411615
SLC6A8	0.410856
NKX1-2	0.4105
ADM2	0.410384
ARHGEF16	0.410156
CXADR	0.409485
FZD5	0.408707
EPHB6	0.408297
DBP	0.40816
MRM1	0.408108
ARHGAP23	0.407995
PLA2G4A	0.407392
BOP1	0.407027
ADI1	0.406933
MRAP2	0.406241
WNT7B	0.405432
C19orf73	0.405155
GNA15	0.403776
CELSR2	0.403764
HSD11B2	0.4025
MMP11	0.402251
DDX53	0.401863
EPHB3	0.401762
ABCC13	0.401727
ADAD2	0.401522
RUNX2	0.401301
CLCA3P	0.401235
RGS9BP	0.400873
ABCA10	0.400759
LRP5	0.400602
EMX1	0.399918
TGFB1	0.399651
EPHA4	0.399176
PAPL	0.398199
DGKA	0.398052
XIST	0.397925
LGALS4	0.397258
KCNA7	0.397153
C3orf72	0.396837
RPP25	0.396507
NWD1	0.396235
TMBIM1	0.396079
CXorf61	0.395437
IMPA2	0.395164
C5orf38	0.392456
IL22RA1	0.391857
MICALL1	0.390871
BCAP31	0.390551
TMEM92	0.39044
ID1	0.390121
PRICKLE3	0.389714
FOXQ1	0.389499
SCNN1A	0.389305
CNFN	0.388793
CYP4B1	0.388583
MALL	0.38675
GALR2	0.386731
NAPRT1	0.386721
NUDT8	0.386624
BCL2L12	0.386441
PLB1	0.386275
GAL3ST2	0.386046
PHGDH	0.385886
KLC3	0.385732
PLD1	0.385486
CMTM8	0.385427
ALDH4A1	0.385256
KRT84	0.385241
CNN2	0.38476
SLC48A1	0.384678
ACSL5	0.384054
TMEM37	0.383978
KCTD15	0.383727
USP31	0.383281
CAPN12	0.383094
OXCT2	0.382931
SLC35D3	0.382139
PLAC1	0.381828
SLC10A3	0.381811
C11orf83	0.38107
PITPNM1	0.380921
PSG5	0.380789
SC5DL	0.38052
RGS12	0.380323
ORC1L	0.38021
KCTD1	0.37951
TEPP	0.379354
FZD6	0.37869
NME1-NME2	0.378376
SNRPD2	0.378337
POLD1	0.378039
CNTN1	0.377905
PRB3	0.377494
SLC17A7	0.377102
FAM131B	0.377013
CYP3A5	0.376938
CAPG	0.376659
CNKSR1	0.376405
SMAD3	0.37635
CPT1A	0.376169
FUT3	0.376132
YDJC	0.376045
CROT	0.375881
TBX18	0.375824
WDR62	0.375538
C11orf20	0.375307
GFOD1	0.374853
SYT5	0.374134
IGF2BP1	0.373718
DLEU1	0.373713
SSH3	0.373396
KCNJ14	0.373067
DHX34	0.373033
HRASLS2	0.372978
TMEM45B	0.37272
IRF3	0.372364
RYR1	0.372256
CLPTM1	0.372238
EPS8	0.372085
GGH	0.371976
QRFPR	0.371947
KRT39	0.371688
SLC34A1	0.371666
C22orf31	0.371455
CSDA	0.371339
FGF8	0.370682
DTX2	0.370635
NLRP2	0.370481
TM7SF3	0.370423
SLC22A23	0.370327
CORO2A	0.37018
TUSC3	0.370125
MAN1C1	0.369903
FAM195A	0.369645
PAX7	0.369485
CAMK2N1	0.369151
TM4SF19	0.369116
NKD1	0.368953
LTBR	0.368808
S100A10	0.368807
SCT	0.368565
SHMT2	0.368472
CXorf57	0.368005
S100A11	0.367614
LOC157381	0.367614
IGFL1	0.367482
TNFRSF21	0.367195
CRH	0.366188
GTSF1	0.365966
B9D2	0.36566
KDELR1	0.36564
DGKH	0.365492
ARG2	0.365182
TMEM19	0.364807
NRG4	0.364474
ETV4	0.364266
TYMP	0.364129
SPINK5	0.364079
YIF1B	0.36406
LRPAP1	0.36331
PTGES	0.363161
DUS2L	0.362659
TRIB3	0.362551
HEY1	0.362493
SLCO3A1	0.362444
SLC22A11	0.362442
RIMBP3	0.362313
SPSB1	0.362268
TSEN34	0.362149
STON2	0.361372
TNNI3	0.36113
RDH13	0.36031
SERINC5	0.360095
CDX2	0.359705
NET1	0.359623
P2RX6	0.359423
C2CD4A	0.359368
C20orf24	0.359362
GSTO2	0.358466
GPR1	0.35838
GM2A	0.357611
CDC20	0.357539
TMEM101	0.357523
CHRNB4	0.356707
HAP1	0.356382
TMC4	0.356327
SLC1A4	0.356157
FAM3C	0.356143
QPCTL	0.356032
EHD2	0.355987
P2RY6	0.355271
KLF5	0.355174
C19orf48	0.355105
RPS19	0.355008
CST5	0.354944
MOCOS	0.354869
MGST1	0.354705
ST14	0.354073
TK1	0.353846
SLC16A3	0.353454
H2AFJ	0.353254
C20orf27	0.353099
CMTM4	0.352667
MT4	0.351503
LCE1C	0.351406
TERT	0.351315
CDH17	0.351107
PPYR1	0.351102
PMEPA1	0.3507
SIGLEC6	0.350344
SLC5A11	0.350277
SERPINE1	0.349909
FTH1	0.349806
CDCP1	0.349678
GAGE2A	0.349544
ACOT11	0.349222
PRSS22	0.348608
TEAD4	0.348372
PRMT1	0.347795
CDCA3	0.347274
HOXC9	0.347122
GRLF1	0.346996
DDOST	0.346891
MECOM	0.34674
NEBL	0.34655
SP7	0.346468
HKDC1	0.346241
ERCC2	0.345978
TXN	0.345456
DDR1	0.345411
OPA3	0.345402
RPS5	0.345233
BAIAP2	0.345191
TALDO1	0.345101
KRT28	0.344928
CTSD	0.344728
SAMD13	0.34471
RARB	0.344548
SFRP2	0.344514
ARHGEF5	0.344301
HOXA11AS	0.344183
HSD17B2	0.344104
KIAA1522	0.34407
LOC341056	0.343978
MEST	0.343877
C11orf93	0.343863
HSP90B3P	0.343763
B4GALNT2	0.343148
RPN2	0.342856
LOC284233	0.342365
SLC6A10P	0.342067
LAD1	0.342031
NAA11	0.341457
HOXC10	0.341251
RUVBL2	0.340929
ACY1	0.340781
ANXA2P3	0.340753
CLSTN1	0.340579
PAK6	0.340559
ATP1A1	0.33996
ITGB6	0.339727
CDK6	0.339338
GAGE12D	0.339192
MVK	0.339022
C10orf58	0.338985
ABHD12B	0.338975
ANO7	0.338209
LY6G6C	0.337731
FANCE	0.337616
MS4A8B	0.337588
SYNGR1	0.337483
TFF3	0.337386
AKT1S1	0.337383
SEMA6A	0.33689
CDC42EP1	0.336818
PRKD2	0.336809
NOMO2	0.336626
CA8	0.336556
MFAP5	0.336552
PLK1	0.336499
APRT	0.336049
SORD	0.335934
TST	0.335596
EPHB2	0.335265
STRN4	0.335115
CDT1	0.33509
SLC6A9	0.334974
CENPM	0.334913
ETFB	0.334655
GINS2	0.334562
NOTCH1	0.334235
CENPA	0.334194
SOX7	0.334063
HK1	0.33315
ADAP1	0.332992
GRWD1	0.332566
GEMIN8P4	0.332454
FUT6	0.331709
CASP14	0.33168
GPR44	0.331462
HIST1H1B	0.331321
B4GALNT1	0.330844
LRFN1	0.33041
GJA3	0.330357
PPP1R3D	0.330248
SDR42E1	0.32991
CYB5B	0.329902
UFSP1	0.329696
ZNF816A	0.329285
PCSK6	0.329165
TCTEX1D2	0.329112
GIPR	0.329039
C1QTNF6	0.328659
NKAIN4	0.3281
CTSB	0.327977
EPAS1	0.327611
ERCC1	0.327458
AXIN2	0.327067
STEAP3	0.326555
HHIPL2	0.326288
CXCL1	0.326241
EDN3	0.326155
IRX2	0.326115
DUSP7	0.32584
FAM25B	0.324933
MBOAT7	0.324796
KRTAP3-1	0.324499
SP6	0.324412
MMP17	0.324326
SQLE	0.324131
BCKDHA	0.324075
TGM3	0.323945
CCND1	0.323872
CAPN1	0.323727
CMIP	0.323429
AURKA	0.323276
MYH7B	0.323211
KIF26B	0.323077
TP53TG1	0.322925
CEP55	0.322883
GGT3P	0.322552
C9orf84	0.322394
CEACAM16	0.32222
UNC93B1	0.322093
GPI	0.322042
MMP23A	0.321784
NOB1	0.321595
ALG3	0.321421
GLA	0.321384
CPA6	0.32119
SPSB2	0.321022
HES5	0.320875
CHST8	0.320333
RTN2	0.320014
IL1RL2	0.319734
ME1	0.319713
CTAGE4	0.319223
MAGEA9B	0.319151
DMRTA2	0.318985
PAK4	0.318963
NAGS	0.318567
CDCA4	0.318437
C20orf151	0.318357
EGFR	0.318205
CCDC60	0.317595
IFFO2	0.317569
CENPN	0.317557
PRR5	0.317293
RAB25	0.316609
SLC1A3	0.316479
ZNF321	0.316345
ZNF593	0.316216
TLE3	0.316168
CES3	0.316059
SLC35F2	0.316056
LYPD5	0.315859
DCAF4L2	0.315813
ENTPD3	0.315537
TRIM28	0.315519
SLC9A5	0.315473
NPPC	0.31541
PSRC1	0.315365
TYSND1	0.315133
FAM98C	0.314961
C1orf170	0.314837
EFHD2	0.31482
KLK6	0.314792
SLC6A6	0.314664
HAS2AS	0.314595
CCDC8	0.314459
CTAGE9	0.313878
NCAPD2	0.313701
HOXC6	0.313477
RPS16	0.31274
COPZ2	0.312722
ITPKC	0.312626
FAM128B	0.312502
PHLDA2	0.312502
PTTG3P	0.312359
RHPN2	0.312315
RGS6	0.312265
AKR1B1	0.312087
PLEKHG6	0.311835
UBE2S	0.311794
F11R	0.311451
KANK4	0.311226
SIGLEC14	0.310549
HTR3E	0.310496
IL18	0.310396
UQCRFS1	0.310374
C1orf127	0.310189
HMX2	0.310099
PCDH1	0.309983
PRR5-ARHGAP8	0.309855
SPTBN2	0.309674
PSORS1C2	0.309487
LDLRAP1	0.309337
FAM131C	0.309333
RPL18	0.308984
UGT2B28	0.30888
DKK1	0.308791
ITGB5	0.308603
SLC27A4	0.308508
PSMD8	0.308433
CD244	0.308322
TMEM54	0.308014
LRG1	0.307295
FTHL3	0.307069
PARD3	0.306883
NTN5	0.3067
TREM1	0.306641
KIAA1199	0.306616
BLOC1S3	0.305656
EIF3K	0.305547
CHMP4C	0.305414
CXADRP3	0.305375
HMGCS2	0.305263
PABPC4	0.305135
FCRLB	0.30513
FLJ16779	0.305125
C19orf40	0.305091
FBL	0.305064
GRN	0.304917
PLA2G10	0.304709
DEF6	0.304589
FAM71E1	0.304585
GLTP	0.304107
ESRRA	0.304058
KCNK1	0.30364
IRAK2	0.303594
CENPB	0.303589
TOP1MT	0.30311
SEMA4A	0.302841
KRT40	0.302818
ATP2C2	0.302628
SLCO1B3	0.302412
FEZF1	0.302403
C19orf46	0.302379
GJA9	0.302302
OVOL2	0.302088
NFKBIB	0.302088
FMO3	0.301958
FDXR	0.301933
RIPPLY2	0.301888
NDFIP2	0.301824
EPS8L1	0.30176
LRP11	0.301735
ECH1	0.301505
PHLDB3	0.301428
GPRC5C	0.301395
C12orf56	0.301342
SIPA1L3	0.301323
PPAP2C	0.301075
SERPINF2	0.300861
GREM1	0.300758
SLC39A4	0.300735
UBE2C	0.300577
ZNF468	0.300278
ILDR1	0.300239
SPOCD1	0.300202
SHB	0.300119
FAM83H	0.299978
CORO1B	0.299732
PLEKHN1	0.29966
LOC100133161	0.299461
ORAI1	0.299433
TMEM189	0.299277
FAM3B	0.299219
FBXO17	0.29916
CCNB2	0.299071
EFCAB1	0.298582
PIK3CB	0.298517
AHNAK	0.298423
TRIP6	0.298023
ADORA3	0.297931
ZSCAN4	0.29775
PAGE2	0.297439
AARS	0.297376
GALE	0.297352
PNPLA1	0.297161
KRTAP3-3	0.297111
HOXA7	0.29631
LHB	0.296094
EIF6	0.296093
DIAPH3	0.29605
RHOD	0.296026
DLX3	0.296007
PTGFRN	0.295997
JUP	0.295893
GAN	0.295684
DLEU7	0.295394
CDK2AP2	0.295362
VASP	0.295116
KLK9	0.295077
A2ML1	0.294997
AGR3	0.294954
GPR153	0.294942
C1orf68	0.294574
FAH	0.294227
SLC5A6	0.294176
FAM22F	0.293951
NTHL1	0.293791
CCDC86	0.293513
SLC46A2	0.293231
TIMP3	0.293184
C11orf92	0.293183
LMX1B	0.293116
SOX13	0.292802
LCN2	0.292573
TRIT1	0.292301
PYCR2	0.29222
TMEM109	0.292063
FAM59A	0.291979
FGG	0.291877
MMP15	0.291828
CARD9	0.291196
PTAFR	0.291124
HIST1H2BM	0.291114
LOC100130776	0.29109
PUS1	0.290804
IGF2BP3	0.290616
OIP5	0.290559
PTTG1	0.290469
PPP1R14C	0.29033
C19orf61	0.290209
PMS2L11	0.29014
LQK1	0.289996
TJP3	0.289788
SIX5	0.289788
FGF20	0.289683
C8orf55	0.289563
MED12L	0.289338
ENO1	0.289276
COMTD1	0.289169
ZNF552	0.28905
CHADL	0.28905
GABRQ	0.288895
DLX6	0.288852
MR1	0.288795
FGB	0.288755
FER1L6	0.28841
GPR158	0.288197
MGC23270	0.288087
EMP2	0.288042
KIF2C	0.287962
DHCR7	0.28793
TMEM48	0.287922
PCSK9	0.287758
ASB13	0.287673
LOC146336	0.287541
ZNF365	0.287363
MFSD5	0.287243
STL	0.287239
ENDOU	0.287059
LOC388588	0.286871
DPP7	0.28667
SYPL1	0.286598
SLURP1	0.286387
STRA13	0.28638
SLC38A5	0.286245
RP1L1	0.286196
LOC84740	0.286072
TFAP4	0.285581
GAMT	0.285441
IRX3	0.285393
RPL13AP20	0.285303
ALDH2	0.285173
S100A3	0.285073
PRR15	0.285068
RRAS	0.28504
NRG1	0.284857
CEBPG	0.284675
CSDAP1	0.284596
SLC6A11	0.284
TMPRSS15	0.283777
TTC7A	0.283188
RAD51	0.283023
IFI16	0.282965
NDRG1	0.282789
FRMD6	0.282787
SLC44A3	0.282786
CDCA8	0.282741
TMEM138	0.282707
CORO6	0.282647
PUS10	0.282525
RPS6KA4	0.282502
DDX28	0.282421
AP2A1	0.282114
LY6E	0.282031
LDLRAD1	0.281792
RPL13A	0.281555
PRRT4	0.281541
ADAM6	0.28153
PLD4	0.281393
PARD6G	0.281103
MRO	0.280587
POLR2J3	0.280393
PXMP2	0.28008
PRDX5	0.279989
ATP2A2	0.279971
AEBP2	0.279589
CD58	0.279577
RIN2	0.279513
STARD10	0.279478
RRM2	0.279065
ADA	0.279035
NOTCH3	0.278763
KLK5	0.278469
SLC4A11	0.278438
UBL4A	0.27828
ETV5	0.278142
CGREF1	0.277843
STK32A	0.277781
PAFAH1B3	0.277655
ANLN	0.277377
SYNGR2	0.277377
C19orf21	0.277353
TXNDC12	0.277219
RAET1L	0.277053
AKR1C4	0.276714
MID1	0.276503
LOC100125556	0.276407
PDLIM1	0.276338
SMARCD2	0.27622
ASPSCR1	0.276139
PACSIN3	0.275839
TM4SF5	0.275781
TROAP	0.275646
C1orf172	0.275394
DHDPSL	0.274964
EPN3	0.274824
TBC1D3G	0.274324
ZP1	0.274231
PPM1H	0.274054
MANEAL	0.273884
AGAP3	0.273791
MICALCL	0.27361
PLA2G15	0.273323
ABHD15	0.273244
E2F2	0.273173
FKBP4	0.27296
CDCA5	0.272894
LOC149134	0.272662
SCAF1	0.272514
FABP6	0.272432
GRTP1	0.272393
RPL28	0.272371
ARHGEF35	0.272302
ACVR1C	0.272213
PTPRF	0.272165
CLPB	0.272159
CCL22	0.271831
GIPC1	0.271725
GUCA1A	0.271591
SAE1	0.271461
CXCR2	0.271053
SARS2	0.270885
PPIH	0.270731
RARG	0.270684
IL15RA	0.270469
GALNS	0.27033
HOXA10	0.270264
ACPP	0.270127
PLTP	0.26994
VANGL1	0.269661
FRMD4B	0.269643
CHCHD7	0.26942
ANKH	0.269318
ACTN4	0.269224
CEACAM4	0.269043
PLBD1	0.268872
C1QB	0.268842
HSPBP1	0.268749
ALOX15B	0.268644
CD164L2	0.268611
DENND2C	0.268322
LYAR	0.268303
TGM5	0.268134
HOXB1	0.268119
HOXC5	0.26783
TP73	0.267741
MMP8	0.267734
LOC541473	0.26745
RNF217	0.267196
PTPRO	0.267105
C19orf60	0.267038
RPL39	0.266812
ARHGEF19	0.266713
PGAM5	0.2666
AIFM3	0.266554
SLC44A5	0.266489
OR2A7	0.266397
PLLP	0.266393
KIAA1609	0.266329
TMPRSS11D	0.266239
GMDS	0.266183
PKMYT1	0.26606
CRNN	0.265986
C12orf62	0.265515
ARSE	0.265295
GPR120	0.265118
UCHL3	0.265018
C1orf135	0.264858
CGB2	0.264806
CYBA	0.264779
C11orf52	0.264774
LGR4	0.264724
HIST1H2BE	0.264505
SUN2	0.264374
C19orf2	0.264246
PRPF31	0.264126
MYPOP	0.264015
NOSIP	0.263905
UNC5B	0.263878
PPIF	0.263739
CBS	0.263734
NUCB1	0.263731
CHCHD5	0.263684
GALNT14	0.263671
ATP8B1	0.26348
ADM	0.263389
TCF15	0.26327
SIRPA	0.263265
MANSC1	0.263172
C6orf106	0.262952
ATAD3A	0.262787
ZNF576	0.262606
TFPT	0.262495
DLL3	0.262492
DCUN1D5	0.262155
USP5	0.262014
UCK2	0.26199
BCO2	0.261965
ANXA2P2	0.261928
TMC7	0.261923
TRIM47	0.261677
MGC2752	0.261437
COASY	0.261382
TTLL12	0.261354
METTL7A	0.261067
TRPM4	0.260862
LOC728643	0.26082
ZNF524	0.260808
ADCY3	0.260736
CSAG2	0.26042
ACADS	0.26041
ALS2CL	0.260354
SYT17	0.26024
RPL31P11	0.260235
GALNT1	0.260211
HOXA9	0.260136
SUSD4	0.259928
FAM157B	0.259928
FLG2	0.259917
LOC254559	0.259789
BEST3	0.259631
GPX4	0.259583
PRMT7	0.259392
LOC284837	0.259356
SESN2	0.259346
TMCO7	0.259335
RNF19B	0.259279
GGT6	0.25926
NEK2	0.259167
IER5	0.259018
NDUFA4L2	0.258849
NT5DC2	0.258715
MGAT3	0.258678
ETV2	0.258603
PAGE5	0.258535
KRT38	0.258461
C18orf2	0.258439
LRFN3	0.258418
C12orf52	0.258245
NINJ2	0.258229
EI24	0.258177
PIGS	0.258157
COL17A1	0.257946
WNT6	0.257903
RDH12	0.257797
GYS1	0.257755
DCTPP1	0.257715
MIOX	0.257461
CEACAM1	0.257361
ARPC2	0.257356
RNPEPL1	0.257144
MYBL2	0.256588
AVPI1	0.256548
SPAG17	0.256491
DDX54	0.256475
LRP3	0.256471
C9orf69	0.256409
MRPL12	0.256371
SRCRB4D	0.256016
KRT71	0.255778
SLPI	0.255729
44813	0.2556
RFC3	0.255486
DSC1	0.255373
EIF2S2	0.255344
GNAI1	0.255261
P4HB	0.255164
A4GALT	0.254831
SCCPDH	0.254783
PGAM4	0.254758
HSD17B8	0.254709
NHLRC1	0.254693
FAM38A	0.254509
CCL27	0.254416
ANKRD57	0.254363
GJC3	0.253751
OSTalpha	0.253578
VIPR1	0.253571
LOC441208	0.253545
VSIG10	0.253541
C2CD2	0.253402
SEPX1	0.253321
PLEK2	0.253311
TMEM20	0.253239
ST6GALNAC4	0.253083
PF4V1	0.252975
C3orf58	0.252773
GUCY2E	0.252749
FYB	0.252641
NPAS1	0.252583
TMEM41A	0.25254
EPT1	0.252219
CCNYL1	0.252175
KLK7	0.251932
FOXD2	0.251761
PLXNA1	0.2517
XPOT	0.251589
CES2	0.251345
GPX1	0.251327
VMO1	0.251296
KRT37	0.25126
OPRL1	0.251142
TXNRD1	0.250965
SH2D3A	0.250951
TMPRSS12	0.250831
TMTC3	0.250825
MRPL51	0.250817
TXNL4B	0.250795
CKLF	0.25076
MYCBP	0.250736
RNASE6	0.2507
ATP6V1B1	0.25066
RNF17	0.250436
MST1R	0.250377
E2F4	0.250348
CAPNS1	0.250341
MUC13	0.250046
PMAIP1	0.250026
POLR2I	0.250015
D2HGDH	0.249997
SRD5A3	0.249965
FAM178B	0.249946
CST6	0.249756
RAB6C	0.249711
DYSFIP1	0.249675
RNASE7	0.249618
SIRT2	0.249331
HSPA1A	0.249287
SYMPK	0.249177
CLEC12A	0.249165
ST6GALNAC2	0.249107
MPV17L	0.248917
SPRR2E	0.248909
NPM3	0.248899
LDHB	0.248887
C1orf190	0.248858
SHKBP1	0.248792
RAB27B	0.248722
AMTN	0.24865
NOP2	0.248523
C12orf66	0.248508
NR1H2	0.248411
VSIG2	0.248388
KRT9	0.248382
NXN	0.248369
FAM108C1	0.248339
CCDC9	0.248283
C1orf133	0.24826
BIRC5	0.248158
ADAM10	0.248078
FOXM1	0.247752
44623	0.247651
CBX2	0.247358
CXorf30	0.247293
PYCARD	0.247101
OAS2	0.246893
ANXA2	0.24687
RPL23P8	0.2468
TRIM65	0.24671
YARS	0.246574
PLCB3	0.246574
HDAC10	0.246534
KCNC3	0.246534
OTX1	0.246512
LASS4	0.24651
ZNF114	0.246503
ADCK4	0.246339
JAG2	0.246095
PPARA	0.246042
TMED3	0.245994
ZDHHC12	0.245914
IMP4	0.245653
RPL18A	0.245643
EXT1	0.245505
KEAP1	0.245193
LRP1	0.245062
ZC3H8	0.244947
CIB1	0.24493
ZNF574	0.244831
APLP2	0.244821
ESRP2	0.24472
CKAP2	0.24465
ALG5	0.24463
PVT1	0.244627
THRB	0.244367
RNASE2	0.243878
DTX4	0.243817
LOC399815	0.24373
HCG11	0.243688
SLC22A18AS	0.243592
MOBKL2C	0.243537
PODNL1	0.243383
TMEM179B	0.243355
MINA	0.24327
OS9	0.243183
ZNF787	0.24305
CHPF	0.242993
SRM	0.242943
UBE2M	0.242911
DHODH	0.242898
FAM54A	0.242719
BIRC7	0.242693
ERGIC3	0.242646
GAA	0.242492
TPX2	0.242414
ANKRD23	0.242386
REXO2	0.242374
RPP40	0.242335
SLC7A6	0.242292
MID1IP1	0.242264
FAM128A	0.242082
ACCN2	0.241963
ITLN2	0.241926
HSF4	0.241678
ABHD1	0.241553
ARSF	0.241488
GCNT3	0.241112
KCNK6	0.241056
RPLP0	0.241034
TECR	0.241019
KBTBD6	0.240999
MMAB	0.240945
PSMD7	0.240899
DPP3	0.240887
WNT3	0.240828
PRDM11	0.240743
KLK11	0.240445
PPP1CA	0.240339
CPD	0.240276
HES1	0.240185
CENPP	0.24009
TAGLN2	0.239984
EXOSC7	0.239964
NUP37	0.239842
PIH1D1	0.239825
DNASE2	0.239808
CKS1B	0.239789
GJA1	0.239586
RAP2B	0.239432
ZNF600	0.239416
FGF4	0.239358
PPP2R2C	0.239197
PDCD2L	0.239093
SLC23A3	0.238844
SIRT7	0.238822
SPC25	0.238784
C1QC	0.238541
TMPRSS13	0.238427
MAP3K6	0.238392
EID2	0.238308
POU2F3	0.237904
KISS1R	0.237791
RPS28	0.237681
SGK223	0.237652
KRT32	0.237617
RPLP1	0.236945
SLC12A9	0.236868
LENG9	0.236813
ZNF584	0.236783
GAGE13	0.236627
EMG1	0.236466
ATP13A2	0.236235
KIAA0564	0.236202
PIGT	0.236176
DHRS2	0.236012
DPRX	0.235924
GNB1L	0.235765
C10orf116	0.235535
NFKBIL2	0.235461
RAD54L	0.235378
MYT1	0.235044
CFTR	0.23497
FAAH	0.234889
ICAM4	0.234339
RAB3D	0.234255
SIRPB1	0.234178
NIPAL3	0.234065
IRF2BP1	0.234054
LYPLA2P1	0.234048
ABLIM1	0.233905
RPS3	0.2338
DAK	0.233758
C22orf23	0.233712
TM2D1	0.23359
PARS2	0.233562
MPHOSPH6	0.23354
WBSCR28	0.233453
EBP	0.233367
CDK1	0.233334
OAS1	0.233272
PORCN	0.233271
MVD	0.233211
CDC26	0.23297
TUBA1C	0.23281
FKBP6	0.232456
DNASE1L1	0.232337
TNNT1	0.232091
STON1	0.231957
TOLLIP	0.231942
TMEM184A	0.231892
GBX2	0.231684
SLC29A1	0.231656
WDR91	0.231654
SLC26A6	0.231635
LGMN	0.231612
PSPH	0.231487
RPS11	0.231382
MFSD6	0.231338
GRAMD2	0.231302
ANAPC11	0.231266
HIST1H2AL	0.231217
PNKP	0.231126
HSPE1	0.231013
CREG2	0.230949
NIP7	0.230945
CDC45	0.230874
ATP5B	0.230733
LIG1	0.23058
RNF126P1	0.230503
HYOU1	0.230447
PVR	0.230374
FAM89A	0.230237
ARHGAP32	0.23022
LRRC25	0.230206
KIAA1161	0.230163
ZNF526	0.230059
TYROBP	0.230003
ERCC6L	0.229843
CTNND1	0.229804
GZMB	0.229716
LSR	0.22961
NSDHL	0.229596
LOC100133893	0.229574
CPSF4L	0.22945
GLRX3	0.229443
ARPC1B	0.229405
ABCB9	0.22936
FAM101A	0.229337
SRPRB	0.22932
MDH2	0.229311
PABPC1	0.229305
TMBIM6	0.229267
ALPI	0.229073
DKC1	0.229017
FOXF2	0.229001
FOXA1	0.228977
EBNA1BP2	0.228962
LOC388796	0.228905
HTR2C	0.228904
PKM2	0.228186
LRRC28	0.228106
ALG10	0.228077
SDC4	0.227979
ANXA2P1	0.227858
CNOT3	0.227812
ZNF319	0.227801
PPP1R13B	0.227726
CKAP4	0.227653
C22orf9	0.227628
FRRS1	0.22758
KIAA1324	0.227549
HM13	0.227547
INHBE	0.227466
IRAK1	0.227415
TRADD	0.227255
THAP11	0.227127
GLTSCR2	0.227023
CD1E	0.227015
YEATS4	0.226934
H2AFX	0.226918
PDF	0.226786
MRPL4	0.22664
HGFAC	0.226541
AHCY	0.226532
SMAD5OS	0.22652
RPUSD3	0.226433
CXorf59	0.226433
PSMA7	0.226405
TMEM216	0.226331
RCC1	0.226198
C9orf3	0.226185
CKM	0.226156
ORM2	0.226141
KIAA1543	0.226129
HIST1H3C	0.225984
CDH1	0.225967
HDHD1A	0.225953
TM7SF2	0.225862
PUSL1	0.22571
ERLIN1	0.225587
ZBTB45	0.225397
PGAM1	0.225055
CLDN19	0.224957
SPAG16	0.224933
ZNF560	0.224906
PADI2	0.224829
TRPM2	0.22479
TPI1	0.224742
PKP2	0.224724
PPAPDC1A	0.22462
CHMP1A	0.224581
PDIA4	0.224581
UBTD1	0.224448
MLF2	0.224331
DYRK2	0.22429
NOL3	0.224271
TPRG1L	0.224076
EIF4EBP1	0.224015
ADRM1	0.223949
PPIE	0.223917
TMEM149	0.223893
INO80C	0.223432
CLEC5A	0.22339
IGF2BP2	0.223369
PSENEN	0.223311
HDDC3	0.223208
ZNF702P	0.223007
LOC152217	0.222978
NUDT1	0.222787
ATF1	0.222719
GEMIN7	0.222586
TACC3	0.222575
POU2AF1	0.222524
PSAP	0.22242
BCL2L14	0.222383
GPD2	0.222189
IGF1R	0.22199
FLRT3	0.221981
STX6	0.221965
FAM129B	0.221762
TMEM160	0.221661
INTS5	0.221591
MTHFD2	0.22156
MYC	0.221554
LRRC1	0.221533
FNDC3B	0.221396
ITPR2	0.22136
LAGE3	0.221077
NUDT22	0.221031
DMBT1	0.220936
MRPL37	0.220831
EPN1	0.220744
ORMDL2	0.220735
PLEKHF1	0.220724
KRTAP2-1	0.220615
SRC	0.220528
OSR2	0.220407
NPW	0.220208
PBK	0.220162
TACC2	0.220004
LIX1	0.219922
WDR77	0.219861
CTU1	0.219816
S100B	0.219709
PLD3	0.219096
TMEM143	0.219071
RACGAP1	0.218866
SHCBP1	0.218777
PTX4	0.218661
PA2G4P4	0.218602
PLEC	0.218564
ZDHHC3	0.218419
MAPK13	0.218258
RAD51AP1	0.218205
TBL1XR1	0.218151
FITM2	0.21809
AKT2	0.217841
STT3A	0.217828
KRT7	0.217731
JAGN1	0.217335
KPTN	0.217075
SLC2A10	0.217022
KCNJ16	0.216697
THNSL1	0.216661
OLFML2A	0.216626
C12orf34	0.216528
DTYMK	0.216507
PRR12	0.216443
TPI1P3	0.216256
MRTO4	0.216226
SLC25A5	0.216125
KCNS1	0.216082
NUPR1	0.215903
CD46	0.215828
TAPBP	0.215709
ITPKA	0.215622
RASA4P	0.215612
CDYL	0.215459
GLUL	0.215413
PXMP4	0.215395
ATP6V1E2	0.215239
DEPDC1	0.215087
IGFBP6	0.21492
KRTAP3-2	0.214901
DMWD	0.214884
LOC441294	0.214815
C21orf45	0.214786
LCE2B	0.214533
GPR78	0.214369
CALM3	0.214165
MSR1	0.214164
MED25	0.214025
NCRNA00200	0.213904
LOC645332	0.213719
FAM3A	0.21365
CHMP2A	0.213641
PRF1	0.213592
CXADRP2	0.213397
COTL1	0.213303
ROM1	0.213276
SLC30A3	0.213206
COPS7A	0.213067
LMTK3	0.21297
IKBKE	0.212815
ZDHHC5	0.212584
CTRC	0.212432
CHAC1	0.212348
C20orf3	0.212102
FCGR1B	0.212078
RAB10	0.211954
MAGEA10	0.211899
NOMO1	0.211675
ORAI3	0.21162
IKZF2	0.211485
ERP29	0.211463
TMEM69	0.211385
PRIM1	0.211297
ACSL3	0.211246
PSMD2	0.210973
KIFC1	0.210836
GART	0.210669
UBE2MP1	0.210646
C6orf145	0.210569
WDR4	0.210561
AGTRAP	0.210557
VPS4A	0.210512
TSTA3	0.210499
FADD	0.210404
TMEM189-UBE2V1	0.210102
BCAR1	0.210068
FCER1G	0.210049
URB1	0.210041
DERL3	0.209693
[truncated: 18,503 more rows]

## Sheet: BRCA
GeneSymbol	logFC
SLC1A5	1.8627
CALML5	1.84809
S100P	1.62663
MUC5B	1.31832
SPDYC	1.29341
NPW	1.2384
CKMT1A	1.23384
ACTL8	1.21277
FUT3	1.19459
CKMT1B	1.1667
MAGEA6	1.15475
PPFIA3	1.13594
MUC2	1.12367
MSLN	1.10263
HOXB13	1.08439
FUT6	1.06846
CXCL17	1.0584
RASAL1	1.05149
MAGEA3	1.04587
OSGIN1	1.03631
SLC7A5	1.02387
KRT4	1.01585
AQP3	1.01554
VGLL1	1.0152
CHAC1	1.01284
VGF	1.00627
ASPHD1	1.00616
CNTD2	0.994516
CHRM1	0.981558
SIX2	0.973791
FOXA3	0.972296
A2ML1	0.968818
LOC100271831	0.95958
HHIPL2	0.953582
SBSN	0.947052
FAM83A	0.939525
C8orf73	0.939432
FAM131C	0.932629
SLPI	0.932333
B3GNT3	0.922845
CDT1	0.916837
NXPH4	0.913534
BIRC5	0.905425
UBE2C	0.89939
ADM2	0.895462
TMEM151A	0.888437
COL9A3	0.887593
SLC15A1	0.879912
UBE2S	0.875974
GALNT14	0.875783
LY6E	0.871791
CENPM	0.869933
TK1	0.865118
C1QL4	0.864566
PKMYT1	0.864051
CHRNA5	0.861363
SFN	0.858068
FOXD1	0.857869
CDC45	0.856013
PSCA	0.855686
SPTBN2	0.853841
EIF4EBP1	0.850822
MYBL2	0.849537
SLC8A2	0.848243
PCSK1N	0.847658
KRT81	0.846736
NMU	0.846668
CLIC3	0.845984
NUDT8	0.840946
CDC20	0.840496
FZD9	0.839517
AURKB	0.839332
S100A9	0.837023
LIN7B	0.834355
BOP1	0.827623
KREMEN2	0.827533
CEACAM5	0.827361
C1orf106	0.822819
DUSP9	0.822584
TMEM52	0.817088
PHLDA2	0.816635
SLC6A9	0.815174
CEACAM6	0.813075
CES3	0.812356
ASS1	0.810782
C11orf83	0.803159
PSAT1	0.802211
GAL	0.800073
RECQL4	0.797482
ISG15	0.790622
COMTD1	0.789937
EXOSC4	0.781612
HIST1H1C	0.781398
CDC25A	0.77808
E2F1	0.77735
TROAP	0.772786
PLAC2	0.771721
LCN2	0.77104
SRPK3	0.770196
NCCRP1	0.76931
RHCG	0.766951
HPDL	0.765693
GPT2	0.763245
ORC6L	0.756186
FXYD3	0.753124
KLRG2	0.753051
PHGDH	0.751792
HES6	0.750127
MNX1	0.749857
S100A7	0.747763
MRPL12	0.74771
PACSIN3	0.746839
TEX19	0.746652
TRPV6	0.745467
SLC39A4	0.743405
CAMP	0.742378
METTL7B	0.742255
ECE2	0.741749
S100A8	0.739972
ITPKA	0.737483
SDF2L1	0.73719
DHCR7	0.733214
PRSS33	0.731484
ETFB	0.726777
B4GALNT2	0.726646
PLK1	0.725393
SCEL	0.724549
C9orf140	0.72286
MAGEA2	0.722843
RIMS2	0.722141
MATN4	0.719589
PANX2	0.719053
SCNN1B	0.718264
GPR172A	0.717835
EPR1	0.716164
ALDOC	0.715436
HIST1H3G	0.714847
TTYH1	0.710915
CDCA3	0.70987
PIR	0.709476
F12	0.709362
KRT6A	0.708281
C8orf55	0.707785
AIF1L	0.706888
TLX1	0.70446
RPP25	0.704234
MFSD2B	0.70297
APOBEC3B	0.702343
LMTK3	0.701153
KRT83	0.700691
PCP4L1	0.696811
KCNH2	0.696578
GCAT	0.696144
PTTG1	0.695032
MVD	0.694932
KLC3	0.693825
CDCA5	0.692491
SPIRE2	0.6909
LY6K	0.690806
C21orf70	0.690572
DLL3	0.690548
S100A1	0.689479
PYCR1	0.68945
KRT16	0.689368
BLVRB	0.687775
IMPA2	0.685031
LY6D	0.684285
PI3	0.680961
CECR2	0.679608
KIF2C	0.678874
CBS	0.676841
TLCD1	0.676601
PRAME	0.671643
FKBP2	0.669736
TOMM40	0.669692
FOXM1	0.667529
ME1	0.666359
RTBDN	0.663709
NDUFB9	0.660524
SLURP1	0.660454
CRABP1	0.660419
NTHL1	0.656974
S100A6	0.654604
ZIC2	0.653196
HORMAD1	0.649969
HMGA1	0.649433
WNT6	0.649389
ATP1A3	0.647703
DDN	0.641781
MAGEA12	0.638294
SLC17A9	0.63599
NRTN	0.635983
MRPS12	0.634705
LRP8	0.634126
CELF5	0.633508
GGTLC2	0.633025
KLHDC7B	0.632987
ATAD3A	0.631097
KCNG1	0.631057
TMEM40	0.630775
GADD45GIP1	0.630412
DNER	0.62949
PYCRL	0.628036
CRISP3	0.627295
SPC24	0.626943
LEMD1	0.626823
RASSF10	0.626005
FAM83D	0.624236
MYEOV	0.622087
ESRRA	0.621845
AURKA	0.620597
C2orf82	0.620082
SLC6A17	0.619196
FCHO1	0.619195
FAM3D	0.6186
SERPINA6	0.618572
CNFN	0.616589
TMEM160	0.616404
GABRA3	0.615836
BAIAP2L2	0.615311
ZIC5	0.614734
GALK1	0.614318
FAM64A	0.613957
HR	0.613734
C19orf60	0.613256
SAC3D1	0.611846
WDR62	0.611033
C20orf134	0.609868
HIST2H2AA3	0.60979
NOXO1	0.609606
MMP1	0.609429
CA9	0.608932
SCRG1	0.60799
MAGIX	0.607471
MESP1	0.607421
CYC1	0.606775
KIFC1	0.606223
TNNC2	0.606112
RRM2	0.60611
SLC16A3	0.605445
RPS19BP1	0.605361
GJB3	0.603956
GABBR2	0.603885
PAFAH1B3	0.603258
ACE2	0.603057
CEBPB	0.60156
SECTM1	0.601411
LAPTM4B	0.60103
TFPT	0.600421
HIST1H2AM	0.59982
FADS2	0.598905
CXorf61	0.597999
RASGEF1C	0.597141
MARCO	0.596528
IL17RE	0.595663
SCGB3A1	0.595592
SLC28A1	0.595352
CCNB2	0.59527
ENHO	0.595267
H2AFJ	0.594653
FABP7	0.594503
CYP27B1	0.59434
FAM27A	0.59365
CDC25C	0.591803
HIST2H3C	0.591464
GINS2	0.591396
FANCA	0.59053
ROMO1	0.590304
KRT13	0.590083
NFKBIL2	0.590011
TERT	0.588905
STRA13	0.588554
MUC21	0.588421
CTU1	0.588292
ISL2	0.587955
CRELD2	0.58674
C5orf27	0.586387
ATP2C2	0.58524
FAM195A	0.585126
PADI3	0.584691
CACNA1I	0.584649
KPNA7	0.584002
H2AFX	0.583553
DBNDD1	0.58326
TMPRSS4	0.583104
KCNK5	0.58238
TKT	0.582285
PRR7	0.582261
CENPA	0.582065
ART3	0.581109
HRAS	0.580868
ADRM1	0.579805
GTSE1	0.579625
RAD51	0.578644
SLCO4A1	0.578558
KCNN4	0.578545
RELL2	0.577432
POU4F1	0.577158
RABAC1	0.577112
NME1	0.576975
WNT3A	0.576606
MGC72080	0.575928
SMOC1	0.575735
TMEM61	0.573485
GLDC	0.571572
NME1-NME2	0.570497
ZNF787	0.570242
IFI27	0.569966
MUC16	0.569838
PUSL1	0.569069
CAPS	0.569032
SLC6A11	0.568552
GNB1L	0.568263
ZNF593	0.566828
AURKAIP1	0.566782
CDCA8	0.566535
CTU2	0.565933
CCDC85B	0.565903
APRT	0.565295
RRP1	0.564885
C16orf59	0.564124
KRT86	0.563407
RCOR2	0.562977
PPAN	0.562462
HJURP	0.561602
C19orf73	0.561555
C2orf54	0.560244
EFNA5	0.559647
APLP1	0.559448
CSAG1	0.559399
RUVBL2	0.559109
HRCT1	0.558879
ABCB6	0.558225
LOC389458	0.556543
TMEM208	0.555899
RRS1	0.555015
MT1G	0.554917
C10orf125	0.554306
PVR	0.553676
C12orf34	0.55216
DDX39	0.551353
TPX2	0.550508
LCT	0.550313
CYBA	0.550271
E2F2	0.549799
KIF18B	0.548511
CDKN3	0.547912
AIM1L	0.546771
SIX3	0.54654
SLC29A2	0.545826
TSTA3	0.545064
FABP6	0.544572
ATP6V0A4	0.543634
AP2S1	0.543613
TST	0.543137
LOC100133669	0.54304
HIST3H2A	0.542571
TRIP13	0.542428
LSR	0.541773
FOLR1	0.541697
GGT3P	0.541655
RPL8	0.541515
ACOT7	0.541489
ISG20	0.541273
CDH1	0.54116
SPAG4	0.541145
LENG9	0.540711
CENPW	0.540678
CBR3	0.540551
ROPN1	0.540391
UMODL1	0.539682
RGS9BP	0.539512
C1orf130	0.539301
ALG1L	0.53774
DCI	0.537509
ETV4	0.536997
CHGB	0.536702
GPR56	0.536105
KIF4A	0.535967
ISOC2	0.535883
MACROD1	0.535192
P4HB	0.534738
LRRC45	0.534215
MGC70857	0.53413
GSTA2	0.53322
FAM155B	0.533187
ADCK5	0.533127
PPP1R14B	0.533061
SLC6A15	0.533012
DHRS13	0.532688
CENPN	0.532129
SLC9A3R2	0.532093
UNC93B1	0.531418
RTN4R	0.53066
LOC100144603	0.529894
SHARPIN	0.52924
GSTA1	0.52921
SHCBP1	0.529206
EXOSC5	0.528245
TRPM2	0.528117
SYCE1L	0.527247
GFRA3	0.526788
NFKBIB	0.526728
NEIL3	0.526553
C18orf56	0.526121
GALE	0.525801
MRPL38	0.525432
SLITRK5	0.525403
NDUFS8	0.524863
TSPO	0.524451
POLR2F	0.524285
ANAPC11	0.524062
44807	0.523812
ACCN2	0.52325
GLI4	0.523085
NDUFS6	0.522792
SLC25A1	0.522784
C4orf19	0.522709
RPS19	0.52231
SURF2	0.522035
CHD5	0.521819
DOHH	0.521659
DNLZ	0.521499
SULT2B1	0.521269
NDRG1	0.521046
NOL3	0.520296
EN2	0.519927
THOC4	0.519868
GGT1	0.519818
C8orf30A	0.519148
KRTCAP3	0.518665
MND1	0.51861
IVL	0.518453
RAD54L	0.517503
NDUFB7	0.517483
FAM5C	0.517005
SHMT2	0.516846
CLDN9	0.516682
E2F8	0.516398
HMGB3	0.516372
NT5DC2	0.516197
ZNF296	0.515844
C19orf48	0.515725
C15orf42	0.515591
MMP15	0.515318
B3GNT4	0.515095
EIF4E1B	0.515041
CCNA2	0.514854
TCAM1P	0.514576
YDJC	0.514512
ZNF750	0.513994
LOC339674	0.513685
PITX1	0.513367
CP	0.513296
HSF1	0.513103
CPLX2	0.512729
VSIG10L	0.512645
ESPL1	0.512607
PLEKHB1	0.512395
AKR1B10	0.512347
CDC6	0.511975
CPNE4	0.51173
MCM10	0.51168
MAST1	0.510656
CBLC	0.510375
CHCHD10	0.509961
TAS1R3	0.509405
EBP	0.509379
FBXL6	0.509082
FAM54A	0.509017
SKA1	0.508425
GPI	0.50811
DDT	0.507913
SEZ6L2	0.507725
NME2	0.507655
PART1	0.507645
PIF1	0.506806
KLK8	0.506684
C14orf80	0.50565
TMC6	0.50562
TNFSF12-TNFSF13	0.505552
SCD	0.505281
CTSD	0.504119
MGC29506	0.503777
DCXR	0.503609
EEF1D	0.503493
HAGHL	0.50329
NCAPH2	0.50257
TUBA1C	0.502567
TIGD5	0.502192
PRSS1	0.50172
SLC26A6	0.501651
TIMM16	0.501511
CTSL2	0.500819
RPS6KB2	0.500759
COX4I1	0.500619
CDK5R2	0.500586
KIF20A	0.498928
DSCC1	0.498668
SLC38A3	0.498558
HSPA1A	0.498403
KRT15	0.49786
SCO2	0.497585
NUPR1	0.497337
BHLHA15	0.496202
NUF2	0.495929
CCDC124	0.495815
DPM3	0.495792
MAF1	0.495435
SKA3	0.49525
FGFBP1	0.495205
TBX10	0.495193
HIST1H2BJ	0.494585
FAM27C	0.493909
SCAND1	0.493881
SNRPD2	0.493134
ALG3	0.493096
TACC3	0.492819
PUF60	0.492719
AQP5	0.491415
BCL2L12	0.491294
TOP1MT	0.491184
PRDX5	0.49072
SOX8	0.490657
GCHFR	0.49059
C10orf91	0.49044
NMB	0.490411
ORM2	0.490233
DRAP1	0.490117
HIST1H2BE	0.490078
MB	0.489947
LOC92659	0.489248
HIST2H2AC	0.488659
HCN2	0.488345
YIF1A	0.488123
SART1	0.487977
WBSCR26	0.487827
PNPLA3	0.487712
GAPDH	0.487563
MRPL14	0.487558
CDH15	0.487433
P2RY11	0.487295
TALDO1	0.487281
RRP7A	0.486116
PCYT2	0.486029
PPP1R14C	0.485937
TMEM54	0.485936
C6orf108	0.48579
ADCY8	0.485711
CLDN6	0.485217
LENG1	0.485209
CD320	0.485099
LOC389332	0.485091
ADORA1	0.484899
MXD3	0.484065
AKR1E2	0.483806
KIAA0319	0.483788
IRF3	0.483614
KAZALD1	0.483542
PRDX4	0.483244
CNNM1	0.483139
SLC25A19	0.483028
LIN28A	0.482727
MGC12982	0.482213
ICAM5	0.481919
PRSS3	0.48179
PPP1R16A	0.481105
EXO1	0.480785
TSKU	0.480572
HIST1H1B	0.480476
TM7SF2	0.480364
BOLA2	0.480224
HIST1H3C	0.479755
RRBP1	0.479289
RAC3	0.47923
MPST	0.479059
TGM1	0.479056
LRFN4	0.478878
TYMP	0.47879
C15orf63	0.478282
NUDT1	0.477647
COMT	0.47708
HIST1H2BO	0.477045
ELF5	0.477016
C1orf135	0.476847
MIF	0.476801
ST14	0.476684
NOP16	0.476347
SPRR1B	0.476011
C11orf86	0.475893
FCRLB	0.475347
STARD10	0.47453
TIMM50	0.474217
GPR12	0.473792
PAPL	0.473402
SPATA2L	0.473247
NAPRT1	0.472977
KCNK12	0.47294
AARS	0.472727
DLX6	0.472617
MFSD3	0.472346
ORC1L	0.471886
S100A2	0.471797
MRPS34	0.471717
SLC4A11	0.471339
SH2B2	0.470188
SPINT2	0.470165
RGS20	0.4699
C11orf20	0.469841
SSR4	0.469736
PDF	0.469717
CCDC129	0.469678
MRPL2	0.46939
DDTL	0.469174
C17orf96	0.468924
WDR74	0.46891
UFSP1	0.468823
ONECUT2	0.468219
CDK18	0.468072
FAM100B	0.467972
DUS1L	0.467901
SNHG6	0.467412
ZNF695	0.467332
ARL9	0.467285
ADAM15	0.467259
MCM5	0.467137
C19orf10	0.467105
ACAN	0.466969
SLC3A2	0.466879
LOC150381	0.466678
MAGEA4	0.466591
CLDN3	0.46655
COPE	0.466532
EME1	0.466495
RDH16	0.466449
SEPW1	0.466202
XKR9	0.465562
RCC1	0.46487
HES4	0.464776
ATP5D	0.464624
TMEM105	0.464491
PTPRU	0.464457
HSPB1	0.464268
CDCA2	0.464194
CYB561	0.463623
NPB	0.463568
TRABD	0.462871
HM13	0.46239
OIP5	0.462377
UHRF1	0.462256
ELMO3	0.462059
ATP6V1C2	0.461744
GIPC1	0.461704
ROM1	0.461149
VMO1	0.460626
MARVELD3	0.460014
CALR	0.459827
CEP55	0.458886
UGT2B7	0.458762
CCNE1	0.458639
FAM96B	0.45846
GPAA1	0.458371
KRT7	0.458191
GJB5	0.458184
PRDX1	0.457538
ATF4	0.457431
CXCR2P1	0.457111
CCNB1	0.456909
MSMB	0.456774
DHDH	0.456719
S1PR5	0.456671
MAGEA9B	0.456613
LOC645323	0.456569
EIF6	0.456502
PRPH	0.456411
PRSS22	0.456407
PICK1	0.456218
CLPTM1	0.456008
GGTLC1	0.455287
KRT6C	0.454826
FDXR	0.454482
LRP5	0.454443
CCDC137	0.454314
CCDC9	0.454212
WFDC3	0.454171
LOC100127888	0.453644
SPAG5	0.453151
ASF1B	0.453085
RPL18	0.453056
CDK2AP2	0.452819
ABCD1	0.452781
DEDD2	0.452729
ATP6V0B	0.452617
MRPL41	0.452561
TFR2	0.452395
CLTB	0.452189
PKP3	0.452106
ITPKC	0.451564
VPS28	0.450428
IFI6	0.449826
FAM72B	0.449725
KCNS1	0.449507
COX8A	0.449473
RASD2	0.44925
BCAP31	0.44902
TMEM171	0.448743
SLC9A2	0.448667
C8orf47	0.448524
TMEM189	0.448107
CDC42EP1	0.448085
PPM1N	0.44764
GRIN2C	0.447152
GAGE12D	0.447138
FAM83F	0.446898
SSSCA1	0.446897
PSMC4	0.446187
TRAPPC6A	0.446187
RPL13	0.445412
HSPBP1	0.445329
NOSIP	0.445272
PRSS27	0.444996
ASCL2	0.444925
NDUFV1	0.444803
UQCRHL	0.444747
TACR2	0.444258
ZFP57	0.444153
KLHDC4	0.444068
PTGES2	0.443859
POLD1	0.443245
JOSD2	0.44321
PCK2	0.442274
GET4	0.442272
CGREF1	0.442126
SQLE	0.441972
G6PD	0.441797
UBE2M	0.441705
MRPL55	0.441225
SYT5	0.440852
DIAPH3	0.440518
PODXL2	0.440332
C11orf48	0.440231
YIF1B	0.439966
MELK	0.439907
LMF2	0.4399
GUK1	0.439751
MTP18	0.439535
RPP21	0.439474
TCEB2	0.439263
LYPD3	0.4392
SULT1E1	0.439108
ICT1	0.438871
KPNA2	0.438674
FBL	0.438172
AQP9	0.437947
RIN1	0.437942
MAPK12	0.437936
SLC25A10	0.437717
ASNS	0.437586
NAT9	0.437578
BATF2	0.437531
FA2H	0.437339
JSRP1	0.437256
AMTN	0.437028
CORO1B	0.437027
KRTDAP	0.436977
PSMD8	0.436903
FBXO27	0.436781
SLC35E4	0.436678
LRRC59	0.436544
DGAT1	0.436457
LPO	0.436371
RASSF7	0.435771
HK3	0.435633
ABCB9	0.435555
HIST1H3B	0.435286
PAK4	0.435198
PC	0.434927
KRT9	0.434388
BARX2	0.434298
ENO1	0.43421
PFKL	0.433783
KDELR1	0.433511
ST6GALNAC4	0.433348
PTRH2	0.433238
CA11	0.43306
RINL	0.432963
ATG9B	0.432473
SLC27A5	0.432316
LOC440957	0.431973
RPS16	0.431897
AZI1	0.431813
CECR5	0.431272
BAIAP2	0.431166
RPUSD1	0.431111
C16orf61	0.431
C17orf106	0.43092
DHODH	0.43091
PRR19	0.43087
CDC25B	0.43062
ATP5G1	0.430591
VASN	0.430361
TRMT61A	0.430109
ZNF524	0.430106
CIB2	0.429999
COX6B1	0.429887
LAD1	0.429672
CARD9	0.42955
FAM158A	0.429165
TMED3	0.428648
LEPREL2	0.428245
C6orf218	0.428101
MT2A	0.428055
TNNI3	0.428048
FKBP11	0.427997
C17orf89	0.427841
PFDN2	0.427691
APOE	0.427674
HTATIP2	0.427644
GSDMC	0.427613
C17orf53	0.427404
S100A7A	0.427388
ANLN	0.426993
NOC2L	0.426846
RHBDD3	0.42655
TRAPPC5	0.426513
LGALS7B	0.426243
DBP	0.4261
HIST1H2BK	0.426031
CDC34	0.425958
YARS	0.424803
HIST1H2AL	0.424594
DEPDC1B	0.424472
MRPL13	0.42424
RPS21	0.423888
C17orf82	0.423719
TLE1	0.42367
PFDN6	0.42356
TNNI2	0.423427
APOBEC3A	0.42309
PHB	0.422987
PRDM12	0.422192
PSMA7	0.421976
POP1	0.421932
PRC1	0.421872
RNASEH2A	0.420781
ALOX12B	0.420729
SLC39A7	0.4206
AGPAT2	0.420499
CHMP1A	0.420298
ELL3	0.419573
FEN1	0.419561
LSM4	0.419546
MRPS24	0.419444
MRPL15	0.419199
BIRC7	0.418867
NDC80	0.418851
SEC11C	0.418737
NKX2-5	0.418498
UBE2T	0.418457
EIF3K	0.418398
MKI67	0.41807
CENPV	0.417669
TAT	0.417437
DDC	0.417336
ZGPAT	0.417302
GAGE4	0.417267
EVPL	0.417075
PBK	0.416849
JMJD4	0.416847
HBA1	0.416842
TMED9	0.416655
GAGE2D	0.416554
CSTB	0.416547
GRIN2D	0.416401
PDCD2L	0.416226
BRMS1	0.416011
FAU	0.4157
TIGD3	0.415482
MAGEA1	0.415344
SYT12	0.415249
NKX2-3	0.415192
UQCRC1	0.415181
CCL18	0.414991
GPS1	0.414364
CD164L2	0.414357
METTL1	0.414264
CALCB	0.41415
PGBD5	0.413982
TEAD4	0.413759
FAM71E1	0.41371
FUT1	0.413585
LOC84989	0.41356
MVK	0.412507
TRMU	0.411872
SRM	0.411625
UQCRH	0.41143
POP7	0.41142
DDRGK1	0.411325
POLR2I	0.411235
SIRT7	0.411172
IQGAP3	0.41099
NAA10	0.410799
NDUFA13	0.410767
PYGB	0.410718
C11orf75	0.410593
CRYBA2	0.410546
MGC14436	0.410516
RNASEH2C	0.40982
LOC388955	0.409814
PTOV1	0.409744
FANCE	0.40973
CHRNB4	0.409519
NDUFB10	0.409448
SYNGR1	0.409238
PAQR4	0.409152
COX5B	0.408799
POC1A	0.408793
WDR34	0.408667
SLC25A39	0.408515
PRMT1	0.408461
SCRIB	0.408072
FTCD	0.40805
CDKN2D	0.408015
HIST1H1D	0.407767
TRIM47	0.407459
MRPL23	0.407171
TP53I13	0.407162
RENBP	0.40702
STIP1	0.406857
RGR	0.40649
CLDN4	0.406276
AQP6	0.406223
ANGPTL4	0.406144
HN1	0.40597
CCDC108	0.405951
ALDOA	0.405831
HSPA1B	0.405564
NDUFA3	0.40547
FAM50A	0.405263
OPRK1	0.404853
TMEM147	0.404849
SPRR2A	0.404724
NT5C	0.404718
DGCR6	0.404677
CNGA1	0.404631
C9orf142	0.404437
NUBP2	0.404321
ULBP1	0.404278
MCM7	0.403862
PDXK	0.403769
FAM25A	0.403698
SLC26A9	0.403552
RDH13	0.40338
DMBX1	0.403151
MUCL1	0.403128
TSIX	0.403062
MRPL21	0.403027
C16orf13	0.402874
SGOL1	0.402461
SIGMAR1	0.402442
PES1	0.402176
PPPDE2	0.402033
SLC35B1	0.401989
C19orf70	0.401725
RRP9	0.401719
HIST1H1E	0.401531
ROPN1B	0.401341
HSPA6	0.401239
SNCG	0.401153
S100A14	0.400967
CCS	0.400767
PSMC3	0.4001
CAPNS2	0.399993
C20orf24	0.399657
CHI3L1	0.399625
MCAT	0.399377
EPN1	0.399143
ECH1	0.399019
ZNHIT2	0.399005
TIMM44	0.398993
C9orf122	0.398992
NANS	0.398635
MRPL36	0.398509
IRF2BP1	0.398479
C12orf44	0.398474
KIAA0664	0.398402
SEC13	0.398055
C19orf46	0.397958
PPP5C	0.39788
NDUFA11	0.397771
C17orf55	0.397708
LGALS9C	0.397707
SMARCD2	0.397243
MRPS18A	0.397194
RPL28	0.396951
FCN3	0.396829
TMEM191A	0.396681
B3GNT7	0.396495
GLTPD1	0.396325
HIST1H3H	0.396252
C2orf7	0.396175
ATP5H	0.396103
TACO1	0.395419
LOC388588	0.395057
TRIM55	0.395022
SLIT1	0.394944
ASPSCR1	0.394904
C7orf50	0.394631
DBI	0.394627
CCDC107	0.394355
CHCHD7	0.393889
HMX2	0.393846
HAR1B	0.393673
FOXD2	0.393395
NDUFS7	0.393091
DDIT3	0.393073
LOC341056	0.392745
RANGAP1	0.392714
FAM98C	0.392615
MIA	0.392563
LONP1	0.392172
SYNGR2	0.391878
CKS1B	0.391714
DPF1	0.391684
C17orf90	0.391629
DEPDC1	0.391627
ITGB4	0.391341
CCL7	0.390919
RPPH1	0.390281
DGCR6L	0.390191
TMEM132A	0.390152
CLPP	0.390122
KIRREL2	0.390117
GJB4	0.389705
C6orf226	0.389452
PSMC5	0.389428
CBX2	0.389348
ABHD11	0.389211
GRWD1	0.389152
TMEM198	0.38914
AIFM3	0.389024
EPCAM	0.38894
PSMG1	0.388383
TIMM13	0.388081
PRR5	0.3879
NCAPG	0.387641
LIG1	0.387508
POPDC3	0.387393
ANKRD9	0.387249
CEACAM19	0.387242
C11orf9	0.387234
SNRPA	0.387086
RBM42	0.386949
KHK	0.386796
KRT18	0.386604
TPI1	0.386576
RPL30	0.386527
PSMG3	0.386122
FAM58A	0.385972
TTLL12	0.385786
PPP1CA	0.385717
MRPS15	0.385541
MANF	0.385536
ARL6IP4	0.385431
NOP2	0.385143
STRA8	0.385038
FIBCD1	0.384989
ALDH16A1	0.384956
CAPN12	0.384912
SAE1	0.384776
C20orf27	0.384652
CKS2	0.384625
PUS1	0.383894
SOX2	0.383749
KRTCAP2	0.383676
DGCR5	0.383644
TIMM10	0.383555
BSG	0.383435
WDR4	0.383376
RIPK4	0.383272
OTP	0.383253
IMPDH1	0.383226
C17orf37	0.383052
GALR2	0.383032
COX6A1	0.382899
TRIB3	0.382887
NR2C2AP	0.382804
CRISP2	0.382712
CYHR1	0.382608
C14orf73	0.382575
LTBR	0.382441
SDHAF1	0.382253
FDX1L	0.382031
OPLAH	0.381987
MTFR1	0.381858
WBP2	0.381708
ALDH3B1	0.381706
ULBP3	0.381328
RAMP1	0.38117
MAD2L1	0.381076
MFSD2A	0.381028
MRPL11	0.380672
PTTG3P	0.380579
NDUFB11	0.380559
MRPL28	0.380403
ERCC6L	0.380157
C19orf28	0.380152
RHCE	0.380089
EPHB3	0.380021
LDHC	0.379858
QPCTL	0.379662
SLC6A2	0.379632
ATP5J2	0.379552
RHOD	0.379397
COX5A	0.37933
CHAF1B	0.379327
IGF2BP3	0.379271
MRPL4	0.379166
LYNX1	0.378843
NRGN	0.378744
CHTF18	0.378742
MRPL27	0.378742
CLDN7	0.378716
PDCD5	0.378543
LGALS9B	0.378438
LRRC24	0.378399
ZWINT	0.378384
OR2B6	0.378278
OGFR	0.377736
CAMK2N2	0.377604
KIAA1751	0.377507
TBRG4	0.377496
MTHFD2	0.377478
C17orf93	0.376806
TRIM31	0.376713
ZNF511	0.376663
FAM72D	0.376423
CNTFR	0.376291
IFI27L1	0.376071
DDX49	0.375566
PCDH8	0.375545
SLC25A33	0.375318
MFI2	0.375128
PDXP	0.375107
DHRS3	0.375078
C9orf100	0.374807
AWAT2	0.374656
SUPT5H	0.374589
KIAA0101	0.374509
FGF21	0.374372
MKRN3	0.374031
SOD1	0.373745
JMJD6	0.37373
SGSM3	0.373664
ORM1	0.373571
NOL12	0.373435
TRAPPC2L	0.373249
FLJ41941	0.37282
KRT8	0.372666
SELO	0.37247
EPS8L1	0.372469
HRK	0.372456
IFRD2	0.372246
C6orf223	0.372242
ATAD3B	0.372205
METTL11A	0.371736
TRPT1	0.371697
TMEM145	0.371686
MIOX	0.371078
TMUB1	0.371065
UPK3BL	0.370856
C19orf53	0.370846
SNRPA1	0.370817
C1orf122	0.370797
ABHD12	0.370769
SCYL1	0.370718
KLK6	0.370326
SLC11A1	0.370214
TSEN54	0.370065
HIST1H2AH	0.369898
CT45A1	0.369771
DCAF13	0.369752
ARHGDIA	0.369732
C16orf42	0.369662
LLGL2	0.369486
REEP4	0.368998
UPK3B	0.368893
TIMM17B	0.368843
TOM1	0.368813
SLC45A4	0.368792
SPRR2D	0.368633
RPUSD3	0.368627
FADS6	0.368599
SCAF1	0.368594
THAP7	0.368467
RPL38	0.36841
PIH1D1	0.368384
LOC286467	0.368325
ENY2	0.367908
HSD11B2	0.367882
BUB1	0.367622
PTK6	0.367557
MAFF	0.367536
PRDM13	0.367419
GPT	0.367395
LOC100131726	0.367383
GRB14	0.367381
LOC152217	0.367376
LOC100134229	0.367233
BARX1	0.367215
ZMYND19	0.366947
SIVA1	0.366554
STRN4	0.366322
SLC2A1	0.366238
YBX1	0.366138
SSX1	0.366101
NMRAL1	0.366091
SHFM1	0.36594
IL20RB	0.365888
TCEB1	0.365489
CDK1	0.365303
CLPTM1L	0.365016
ZFPL1	0.364981
ELOVL3	0.364722
GMPPB	0.364711
C19orf63	0.364572
FKBP8	0.364417
UPK2	0.364282
LYZL2	0.36383
C7orf55	0.363804
PGP	0.363796
B3GAT1	0.363752
MPG	0.363617
EPHX1	0.363606
PRPF31	0.363106
PRELID1	0.363077
L1CAM	0.363066
C1orf35	0.362923
NCAPH	0.362826
SRPRB	0.362433
WFDC2	0.362409
RANBP1	0.361964
NDUFS5	0.361957
MUC15	0.36187
HIP1R	0.361794
LGALS7	0.36176
DHX34	0.36147
LOC388796	0.361426
CDH19	0.361393
EML2	0.361183
GABRG3	0.361156
FSD1	0.360604
LSM7	0.360555
RPN2	0.360131
GLYATL3	0.360105
FOXH1	0.360057
SCARB1	0.36004
PPP1R14D	0.359623
PSAPL1	0.359413
HEATR7A	0.359394
CRYBB2	0.359296
RAET1K	0.359105
ACOT8	0.359084
RNF39	0.359024
PSMB4	0.358999
ARFGAP1	0.358793
PQBP1	0.358748
UQCRB	0.358696
APOF	0.358228
DPYSL5	0.358223
CCNE2	0.358179
YIPF2	0.35817
UQCR10	0.358162
ORMDL2	0.358048
TRAP1	0.358032
RUNDC3A	0.357952
CSN3	0.357927
C11orf80	0.357858
LIN37	0.357775
POLR2L	0.357722
FFAR2	0.357672
HAPLN3	0.357611
NUTF2	0.357342
BAX	0.35729
MAPK15	0.357241
PNKP	0.357017
C19orf24	0.356852
AMY1A	0.356722
FKBP4	0.356458
DTYMK	0.356454
PPDPF	0.356322
PPIB	0.356246
AHCY	0.356242
RAD23A	0.355997
PDZD7	0.355655
IGF2BP1	0.355401
SYNGR4	0.35536
SMPDL3B	0.355325
ZNF574	0.355226
DLGAP5	0.355001
C20orf135	0.354557
RPN1	0.354508
COQ9	0.354475
POR	0.354475
PTDSS1	0.354456
HAGH	0.354398
LMAN2	0.354316
GEMIN7	0.354146
C16orf75	0.353969
KRT78	0.353891
ENDOG	0.353877
LOC143666	0.353874
NEK2	0.353766
SLC22A18AS	0.3537
SERTAD1	0.353623
H2AFZ	0.353598
PRKCSH	0.353531
PRRG2	0.35352
SLC19A1	0.353177
PRSS41	0.353111
TUBA4A	0.352997
ELOVL1	0.352961
MRPS7	0.352941
NHP2L1	0.352933
PHLDB3	0.352671
TSEN34	0.352646
NAPA	0.352531
ETHE1	0.352529
C8orf76	0.352493
SERPINB3	0.352346
LPAR2	0.352103
ZC3H3	0.351558
HDAC10	0.351558
KLF16	0.351441
VWA1	0.351276
BLOC1S3	0.351137
FARSA	0.350971
C11orf84	0.35072
FLJ23867	0.350686
MDGA2	0.350564
ETV2	0.350561
EIF5A	0.350512
MAPK8IP2	0.350494
LRFN1	0.350342
BANF1	0.350337
CHEK1	0.350142
MTHFD1L	0.350051
NDUFB8	0.350048
CCT5	0.349924
TCF15	0.3499
LOC84740	0.349786
FBXL15	0.349628
ANKRD39	0.349594
PARP10	0.34941
SSNA1	0.349063
SCGB2A1	0.349017
POLD2	0.348911
MYO7A	0.348716
KRT23	0.348698
TH	0.348593
VAMP8	0.348493
RPRM	0.348433
SNRNP25	0.348331
ADORA2B	0.348214
ZNF579	0.348164
HSPE1	0.34771
PSMB6	0.347604
FTL	0.34757
FAM3A	0.347552
SLC7A11	0.34731
DNTTIP1	0.347242
GARS	0.347086
FAM195B	0.347043
CAMKV	0.346909
MMP24	0.346811
ACY3	0.346809
PDIA2	0.34648
RALY	0.346419
HAUS7	0.346387
VPS4A	0.346385
RNF222	0.346251
CXorf49B	0.34622
GSDMD	0.346078
HDAC11	0.345888
TYRO3	0.345722
MPHOSPH6	0.345698
IRAK1	0.345636
CDC42EP5	0.345576
TFF2	0.345361
OLIG1	0.344893
KCNQ2	0.344829
TNFRSF12A	0.344636
TRPM8	0.344619
IDH2	0.343969
LRPAP1	0.343856
MCM2	0.343782
ARMC6	0.343632
TSSC4	0.343627
ZNF280A	0.34355
WBSCR22	0.343412
TMEM161A	0.343333
SEC61G	0.34321
SYP	0.34316
FGFR4	0.343022
PARD6A	0.342851
FAM83H	0.342835
SLC13A3	0.342716
EMG1	0.342505
C17orf67	0.342484
PLOD1	0.342479
RPL18A	0.342297
CD3EAP	0.342275
GJB1	0.341532
SNHG9	0.341351
MYLK2	0.341041
C1orf170	0.34091
GYLTL1B	0.340898
PDHA1	0.340896
C16orf48	0.340868
KRT19	0.340793
HBQ1	0.340726
UPP1	0.340606
BOLA3	0.340453
SRD5A3	0.34011
ATAD2	0.339923
IDH3G	0.339922
ALG12	0.339481
MSL3L2	0.339183
LAG3	0.338741
AKT1S1	0.338476
RARRES1	0.338414
NKPD1	0.338376
TRMT112	0.338197
DNAJB11	0.338137
RDBP	0.337994
PTMS	0.337973
PFKP	0.337952
ANKRD54	0.337927
NUDT22	0.33742
B3GAT3	0.337296
TMEM93	0.336957
FAM111B	0.33691
ZIC1	0.336851
HSPD1	0.336604
SNF8	0.336604
DLX6AS	0.336277
SLC5A11	0.336115
C10orf75	0.335977
ADM	0.335941
MRPL52	0.335637
SPERT	0.335578
NANOS1	0.335354
SMC1B	0.335283
PSMB10	0.33524
IL29	0.335108
PSMB3	0.335047
IMP4	0.334891
ENTPD2	0.334864
CBX8	0.334845
MRPL53	0.334838
SLC27A3	0.33466
ORAI1	0.334615
C5orf46	0.334596
NDUFAF3	0.334577
HAUS8	0.334529
ZNF707	0.334464
TRADD	0.334387
C6orf129	0.334288
KLK9	0.334097
EIF5AL1	0.334078
ESRP1	0.333733
CLN6	0.333618
TIAF1	0.333616
SPSB2	0.333589
EPHX3	0.333465
RILP	0.333263
DUSP13	0.333163
SARS2	0.333049
HIST1H2BH	0.332989
RCCD1	0.332943
TMEM11	0.332641
LOC150197	0.332482
FBXO2	0.332377
CCNF	0.332262
HYOU1	0.332126
C15orf23	0.33193
ATP5I	0.331822
ALKBH6	0.331779
ARHGAP39	0.331747
MLF1IP	0.331552
SCXB	0.331539
LOC401010	0.331468
RPL35	0.331405
SF3B5	0.331363
EIF3B	0.331335
NME2P1	0.331269
ALDH3A1	0.330612
ARSF	0.330255
SH3BP1	0.330049
VAX2	0.329847
FAM128B	0.329825
EIF2C2	0.3297
TMEM223	0.329645
FAM173A	0.32955
TNFRSF18	0.329354
HOMER3	0.329306
SELS	0.329283
CHRM3	0.329263
ACO2	0.329033
CRYAB	0.328899
44813	0.328833
NDUFA6	0.328695
ZFAND2A	0.328519
NUCB1	0.328467
HIST2H4A	0.328311
RPS5	0.328206
ZDHHC12	0.328093
CDCA7	0.327975
ARFRP1	0.327946
S100A13	0.327942
EPN3	0.327891
ZDHHC16	0.327788
WIT1	0.327756
GLRX2	0.327673
ATP6V0C	0.327576
BDH1	0.327369
AMN	0.32736
LSS	0.327268
VWA5B2	0.327143
LRWD1	0.327142
SH2D3A	0.327139
GNB3	0.327039
SERPINB4	0.327038
JTB	0.326942
TPD52L1	0.326824
NPTXR	0.326733
PDZK1IP1	0.326527
ALKBH7	0.326423
BYSL	0.326281
C8orf59	0.326206
COX7B	0.326188
HDDC3	0.326185
WFDC12	0.325788
NUSAP1	0.325676
TMEM8A	0.325599
WDR67	0.325536
HMBS	0.32541
C19orf47	0.325318
CCDC134	0.325217
APOC1	0.325141
BID	0.325119
GAS2L1	0.3249
CPSF1	0.324738
TCAP	0.324703
STMN1	0.324605
HIST1H2BN	0.324489
CNPY2	0.324297
CHMP2A	0.32414
ZC3H18	0.324124
RRP12	0.32402
PVT1	0.323958
ACCN1	0.3239
SERHL	0.3238
PPM1E	0.323794
NARFL	0.32372
PPP1R13L	0.323709
HRH3	0.323679
CDCA7L	0.323618
COMMD5	0.32353
RLBP1	0.323268
HSD17B10	0.323064
MLF2	0.322846
TREX1	0.322715
IRF7	0.322715
METRNL	0.322707
PSORS1C2	0.32264
UFD1L	0.322533
SLC25A22	0.322531
MANEAL	0.322446
ARF1	0.322422
HIST1H4H	0.32235
OCA2	0.322287
NDUFA1	0.322236
PLOD3	0.32219
SH3GL3	0.322163
TMIE	0.322092
TRAIP	0.322082
NCLN	0.32202
ZFP42	0.321988
HMGB2	0.321967
PMM2	0.32195
C20orf46	0.321836
PIN1	0.321685
LOC121838	0.321582
SNRPC	0.321374
C10orf47	0.321271
PADI1	0.321021
TSNARE1	0.32101
NPC1L1	0.320845
MRPS26	0.3208
MRPL17	0.320778
KARS	0.320529
GAGE12J	0.320474
ZP2	0.320392
CA6	0.320295
POLR2J	0.320125
U2AF1	0.320087
STUB1	0.320044
RAET1G	0.320002
FAM72A	0.319972
PSMD4	0.319934
ALOXE3	0.319909
LOC442454	0.319908
COX17	0.319889
WT1	0.319872
TSPAN8	0.319817
NR1H2	0.319608
CTSA	0.31938
CCDC86	0.319371
LYPLA2	0.319172
PWP2	0.319041
RPLP2	0.318931
PLCH1	0.318717
ARC	0.318695
FBN3	0.318553
BSCL2	0.318483
NIPAL1	0.318378
LMO1	0.318192
SPRR2E	0.318087
TMEM134	0.318006
PADI2	0.317984
FAHD2A	0.317913
LMNA	0.317654
NFKBIL1	0.317633
ILVBL	0.317556
EFNA3	0.317548
GIYD2	0.317417
PIM3	0.317346
HS3ST6	0.317336
PEX16	0.317009
PPAP2C	0.316865
EN1	0.316795
TTK	0.316678
PELI3	0.316559
SVOP	0.316497
LAGE3	0.316451
RYR1	0.316434
ULBP2	0.316123
TEX264	0.315798
INO80B	0.31577
POLR2K	0.315546
NARF	0.315533
E4F1	0.315421
ARPC1B	0.315148
CKM	0.315111
C9orf16	0.314785
PSMG4	0.314663
AP1B1	0.314598
MRPL48	0.314547
PHF5A	0.314509
TFAP4	0.314433
PSMC3IP	0.314272
MAP3K10	0.314267
FAM89B	0.314032
GALT	0.314018
MFGE8	0.314
SPC25	0.313919
A4GALT	0.31383
PROZ	0.313591
OVOL1	0.313549
MX1	0.313536
GRINA	0.313478
MRPL37	0.313465
GPR172B	0.313399
PSMD7	0.31288
CCK	0.312868
RHBDF2	0.312851
SYT8	0.312831
CHKA	0.312815
MT1H	0.312772
COX4NB	0.312696
GSTP1	0.312459
DDX54	0.312448
HIST1H2AG	0.312435
TUFM	0.312134
PSRC1	0.311929
RDH12	0.311811
GNA15	0.311525
TUBA1B	0.31147
ZNF598	0.311202
CARS	0.311198
MT1X	0.311174
UBXN1	0.31099
TBL3	0.310901
POU5F1B	0.310873
DGKZ	0.310827
IL4I1	0.310796
ECEL1	0.310747
VSTM2L	0.310709
NSUN5	0.310621
RTN2	0.310599
HDGFRP2	0.310538
C12orf57	0.310444
CN5H6.4	0.310244
MYPOP	0.310135
LOC728554	0.310078
ALOX12P2	0.310041
LOC643008	0.310029
LDHD	0.309914
RIMBP3	0.309894
C4orf48	0.309866
PNP	0.309504
GYS1	0.309479
ABCC12	0.309406
ATF5	0.309393
ERP29	0.309343
SPNS2	0.309336
ACP5	0.309024
SAP30	0.308981
NUDC	0.308818
NCRNA00162	0.308787
CHPF	0.308676
MAGEC2	0.308665
USP18	0.308606
RDH10	0.308605
IL17C	0.308567
FLJ45445	0.308557
TRMT2A	0.308499
RBM38	0.30831
SLC25A18	0.308209
DDX28	0.308072
SYVN1	0.307987
HIST1H2AE	0.307923
DQX1	0.307921
MED30	0.30792
UBE2MP1	0.307917
RPL13AP3	0.307856
GBAP1	0.307848
RNF181	0.307739
GMDS	0.307729
KCNK7	0.307666
TPM2	0.307641
DYNLRB1	0.307592
NTS	0.307558
GNGT1	0.30754
C11orf2	0.307306
SLC38A10	0.307263
GPX1	0.307216
MARS	0.307209
GMPPA	0.306886
TRPV4	0.306724
COPG	0.306717
FAM83C	0.306203
PAF1	0.30607
SCARNA12	0.305695
BEST4	0.305454
C21orf119	0.305355
PMM1	0.305264
NDUFV3	0.305227
FXYD5	0.305035
HPCA	0.305028
LOC100130776	0.30492
AUP1	0.304903
HIST1H3A	0.304868
IP6K3	0.304742
ESRP2	0.304695
FAM19A3	0.304669
ELOF1	0.304379
EDF1	0.304271
C6orf136	0.304266
SLC29A1	0.304226
DMRTC2	0.304184
NDUFA7	0.304014
NEU4	0.303931
KIAA0415	0.303926
TXN	0.303649
PSMD12	0.303585
GPR19	0.303524
CPAMD8	0.303524
SNCB	0.303416
POLR1C	0.303318
GSG2	0.3033
ERGIC3	0.303292
TSFM	0.303172
THOP1	0.303087
SLC6A10P	0.30292
NOC4L	0.302883
RNF126	0.302747
CRYBB3	0.302731
HGS	0.302629
SMOX	0.302521
UNC93A	0.302498
MRTO4	0.302248
RACGAP1	0.30221
GRB7	0.302167
ZDHHC24	0.30183
CCDC61	0.301819
SYMPK	0.301719
VASP	0.301694
TMEM201	0.301677
GOT1	0.301647
ZNHIT1	0.301454
OGDHL	0.301446
CALM3	0.301111
EPS8L2	0.301016
ANKRD58	0.300916
MPV17L2	0.300849
PGLS	0.300668
ACSBG1	0.300557
RRP7B	0.300493
FGFBP3	0.300477
PYY2	0.300382
BCL7C	0.300347
GALNT3	0.300263
MED25	0.299987
ENTPD6	0.299957
PPP2R3B	0.299865
SPR	0.299783
LOC80054	0.299696
RIMBP3C	0.299644
NUDT5	0.299562
CHST4	0.299519
NPM2	0.299208
TMCC2	0.299172
GNG13	0.299166
CYP2J2	0.299085
NDUFA4L2	0.299039
ARSA	0.298867
LOC96610	0.298805
CHMP4C	0.298769
RAET1L	0.298599
PDAP1	0.298587
CHEK2	0.298533
TMEM125	0.29853
MEA1	0.298417
NDUFAB1	0.298144
ZNF576	0.298136
C15orf39	0.298083
HIST1H2BL	0.297945
GRPEL1	0.297879
C10orf116	0.297879
C19orf61	0.2977
MT1E	0.297619
ADCK4	0.297412
B4GALNT1	0.297359
PSMB5	0.297341
ZNF581	0.297292
HMGCS2	0.297108
FASTK	0.297038
CDR2L	0.296982
EIF2S2	0.296912
ATP5E	0.296907
LSMD1	0.2969
C21orf58	0.296824
DUS3L	0.2968
UGT2B28	0.29671
BUD31	0.296588
MDFI	0.296525
ACTR3C	0.29652
CPLX3	0.296296
IER5L	0.296266
C7orf52	0.295919
SYTL1	0.295756
NHP2	0.295754
UNC5A	0.295654
ZNF628	0.295597
CHAF1A	0.295566
MIIP	0.295473
PDIA6	0.295444
FKBPL	0.295444
NOB1	0.295368
CECR6	0.295365
KATNB1	0.295253
HAMP	0.295203
NR2F6	0.294744
P2RY6	0.294659
EIF3H	0.294608
SLC2A4RG	0.294504
FOSL1	0.29446
CDKN2A	0.294328
PRR11	0.294259
ATP1B3	0.294126
CARHSP1	0.293869
44630	0.293846
SLC25A6	0.293621
NPM3	0.293524
MTX1	0.293411
LACTB2	0.293391
PKM2	0.293218
KCNQ4	0.293151
MUC20	0.293148
MFSD10	0.293079
ITGA2B	0.293068
LMNB2	0.293066
HAR1A	0.292932
HIST1H3D	0.29292
HSH2D	0.292861
DUS2L	0.292684
TREM1	0.292653
MRPL51	0.292638
PNLIPRP3	0.292515
AIP	0.292495
PA2G4	0.292474
JAGN1	0.292467
SNRPB	0.292407
NSDHL	0.292381
ZNF526	0.29225
ADAT3	0.292224
IFI27L2	0.292178
LOC283404	0.292128
C6orf125	0.292095
MRPL40	0.291899
RPS2	0.291897
C8G	0.291724
AIFM1	0.291652
SIL1	0.291544
HSPB9	0.291394
MAD1L1	0.291377
NDUFA9	0.291365
TOMM22	0.291229
COL2A1	0.291118
GMPR	0.291087
AK1	0.291008
DVL1	0.290965
ST20	0.290887
GPX2	0.290843
HIST1H3J	0.290753
KDELR2	0.290715
SPINT1	0.290414
SUV420H2	0.290345
CD14	0.29033
TUBB2C	0.290192
FBXL16	0.290039
MAP2K3	0.28988
KDELR3	0.289764
RPS20	0.289761
ALK	0.289515
TMED1	0.289297
TRMT1	0.289238
CEBPG	0.289189
IBSP	0.289069
ABTB2	0.288973
SERF2	0.288688
LOC440461	0.288677
ASPM	0.288597
SLC35A2	0.288363
ZNF706	0.288335
C14orf156	0.288332
WBSCR27	0.288328
PDSS1	0.288288
MRM1	0.288201
TYMS	0.288199
CD63	0.288137
POLR2C	0.288017
FDPS	0.287969
GFER	0.287836
PSMD3	0.287701
PSMB2	0.287658
TNS4	0.287585
CCDC12	0.287498
ACD	0.287425
LIN28B	0.287336
CHCHD8	0.287194
SHKBP1	0.286932
RIBC2	0.286842
MRPS23	0.28635
C7orf61	0.286161
RPL36	0.286051
SPRR1A	0.285983
ZNF444	0.285906
TRIM11	0.285896
GAGE1	0.285737
C20orf20	0.285708
MRPL24	0.285657
RIMKLA	0.285648
SQSTM1	0.285489
DGCR14	0.285462
AGTRAP	0.28545
TECR	0.285356
TLX1NB	0.285353
KIF23	0.285299
SLC6A8	0.285286
CFL1	0.285022
LOC84856	0.284974
KLHL35	0.284958
C16orf55	0.284618
TELO2	0.284611
NDUFB1	0.284605
FADD	0.284464
SLC4A5	0.284426
PTCHD1	0.284364
HRSP12	0.283975
MDH2	0.283925
GABRD	0.283899
BCAR1	0.283886
POU5F1	0.283857
MRPS11	0.283631
FADS1	0.283438
CC2D1A	0.283438
[truncated: 18,503 more rows]

## Sheet: CESC
GeneSymbol	logFC
ADH7	3.18723
SERPINB13	3.12904
CALML3	3.03047
CAPNS2	2.80404
SPRR3	2.71427
KRT13	2.61495
DSG3	2.58883
KRT4	2.56927
DSC3	2.54706
KRT6A	2.45894
ANXA8	2.35707
GBP6	2.31589
BNC1	2.24983
TP63	2.22849
TMPRSS11D	2.22796
SPRR1B	2.20089
KRT14	2.15987
PKP1	2.15087
LY6D	2.11113
LOC642587	2.09361
KRT5	2.08977
SPRR1A	2.0783
IGFL1	2.0749
CLCA2	2.06448
TMEM40	2.05141
ANXA8L2	2.04436
CSTA	2.03017
C12orf54	1.99735
GPX2	1.96969
TMPRSS11A	1.95256
IVL	1.95149
RHCG	1.94151
KRT6C	1.90007
GPR87	1.89728
GPR109A	1.8769
SOX15	1.87545
AIM2	1.86048
SLC1A5	1.8029
LGALS7	1.78216
NEURL	1.7809
KRT6B	1.73211
SERPINB3	1.7314
VSNL1	1.72009
SERPINB2	1.71714
GPR115	1.71533
LASS3	1.70853
SERPINB5	1.70543
AKR1C2	1.69546
IL20RB	1.69245
CYP2S1	1.66608
ALDH3A1	1.64982
GPR109B	1.6237
S1PR5	1.61915
AMTN	1.61651
PLAC8	1.59652
FAM83C	1.58413
DUOXA2	1.57562
FST	1.57192
HOXD11	1.55945
TCHH	1.55613
LYPD3	1.55418
KRT15	1.55276
IL12RB2	1.54892
ANKRD2	1.52093
KRT16	1.51244
THBD	1.4847
C1orf110	1.48262
TNS4	1.48106
NTF4	1.47605
SERPINB4	1.47593
UGT1A9	1.47023
HES2	1.46592
S100A2	1.46468
SFN	1.46416
FABP5	1.45879
PCP4L1	1.45157
RHOV	1.44896
ZNF750	1.44393
SNX31	1.44344
KRT24	1.44127
FXYD3	1.43509
C10orf99	1.43461
KLC3	1.42343
C9orf84	1.41788
GJB5	1.40811
UGT1A6	1.40056
KRT31	1.39954
HSPB3	1.3962
PTPRZ1	1.38964
C19orf33	1.38528
CXCL17	1.3846
DLK2	1.38029
DUOX2	1.37872
PLAC2	1.37776
ZNF114	1.3729
RYR1	1.37284
CGB7	1.35713
CRNN	1.34876
SNCG	1.34515
GSDMC	1.33826
CHP2	1.33646
HAP1	1.32422
NIPAL4	1.32391
MYEOV	1.32311
CLEC2B	1.31911
PGLYRP3	1.31562
CYP4B1	1.31165
KLHDC7B	1.31098
TRIM29	1.30987
SERPINB11	1.30526
CYP4F12	1.30264
SNAI2	1.30042
TNNT3	1.29726
SLC8A2	1.29714
SOX2	1.29202
FKBP6	1.29197
RPS28	1.29094
C5orf38	1.28625
EFEMP1	1.28369
BCL2L10	1.27707
FAM83A	1.27503
NPAS1	1.27464
SPRR2D	1.27248
CLDN1	1.27188
MMP13	1.27087
TACSTD2	1.26294
CNTNAP3	1.26225
DKK1	1.26188
PADI1	1.25871
BMP7	1.25428
AKR1B10	1.24457
MSMB	1.24249
NTS	1.22603
S100A8	1.22365
GCK	1.21933
PRDM13	1.21227
SH3GL3	1.20557
GJB4	1.20512
AKR1C1	1.20494
IRX2	1.19974
ZNF488	1.19841
C9orf169	1.19318
IRX4	1.19211
LGALS7B	1.18935
NGB	1.17248
NLRP7	1.17248
HOXD1	1.17246
C12orf56	1.17078
SLC1A6	1.16932
TLX3	1.16623
A2ML1	1.16455
SPRR2A	1.15899
PPP2R2B	1.1585
KRT19	1.15846
DUOXA1	1.15771
KRT17	1.14685
FBXO27	1.14469
FAM70A	1.14347
FOXE1	1.14245
CEACAM6	1.14211
MT1X	1.1338
HAS3	1.13029
C3orf54	1.13003
TRIM7	1.12857
WNT2B	1.12666
ZFR2	1.12173
LY6G6C	1.11821
GRHL3	1.11715
TMPRSS11B	1.11602
DMRT2	1.11189
C16orf74	1.10967
MAOA	1.10883
SCGB1A1	1.10453
LOC441869	1.10406
CEACAM5	1.10153
CALML5	1.09917
PTHLH	1.09777
LOC541473	1.09646
ICAM4	1.09499
CLCA4	1.08613
RASIP1	1.08566
SDR16C5	1.07817
BTBD11	1.07123
FETUB	1.06777
NHLH2	1.06776
LY6K	1.0638
GPR172B	1.06101
MYC	1.05886
B4GALNT2	1.05597
DKFZp434J0226	1.05461
HOXA7	1.04062
FMO3	1.03702
USH1G	1.03516
GABRA3	1.03515
KRT34	1.03229
CGB8	1.03201
TGM1	1.03158
KLRG2	1.0304
SRRM3	1.03
TSIX	1.029
RPTN	1.02859
PPP1R13L	1.02791
STAG3	1.02595
MMP28	1.0249
PTGES	1.0215
SYT8	1.0202
ALG1L	1.01612
SOX21	1.01203
AIM1L	1.00906
DEPDC7	1.00698
INA	1.00626
LOC100131726	1.00296
NPBWR1	1.00041
C11orf53	0.998223
NEBL	0.99584
OLR1	0.994644
CPA6	0.994431
CYP4F3	0.991823
HS3ST6	0.987291
CGB	0.985359
WDR66	0.984708
UGT1A7	0.980876
PAX9	0.980088
KRT78	0.975764
KRT74	0.975727
GAST	0.97536
TNFSF12-TNFSF13	0.973104
KRTAP4-1	0.972226
ARSI	0.971592
PPM1N	0.968044
CORO6	0.966274
FOXN1	0.966068
KCNG1	0.965696
ANXA8L1	0.965118
NKX2-3	0.964319
MUC4	0.963905
TSLP	0.963262
PSG5	0.961421
UPK3BL	0.959822
TG	0.957523
CGB2	0.953847
NRG1	0.952543
FERMT1	0.950293
CGB5	0.948461
IL1F5	0.947461
GSTM1	0.938464
GABRE	0.935348
CCL26	0.933153
CKMT1A	0.932592
WFDC5	0.929928
A4GALT	0.927892
SLC39A2	0.921758
COPZ2	0.920158
KPNA7	0.918521
KLK13	0.91848
HOXD13	0.916897
CEBPA	0.916061
GALNT5	0.915903
HSPB1	0.915523
SIX2	0.913127
KRT9	0.913069
FBXO17	0.912238
PRSS21	0.911283
RAET1E	0.910146
MUC21	0.910113
HYAL1	0.90511
CXCL13	0.901614
EDARADD	0.901012
ZIC5	0.899256
LOC728643	0.893421
HS3ST4	0.892762
CST6	0.892631
NTRK2	0.890107
RNASE7	0.886766
ABCA13	0.883566
NUPR1	0.882834
TCF15	0.879578
PSG4	0.879352
FAT2	0.878227
EHD2	0.877895
TNNI2	0.877841
TPRXL	0.875928
RGS9BP	0.871149
ADRB2	0.870371
NCCRP1	0.870329
SPINK5	0.869576
IL18	0.869068
PRKCQ	0.868364
IGFBP6	0.867218
RAPGEFL1	0.866942
TNFRSF18	0.865366
FOXD3	0.864342
STARD5	0.864132
COL7A1	0.863847
C12orf59	0.862687
CALB1	0.86211
PYGL	0.861394
NMU	0.860088
RGS20	0.85638
S100A9	0.854676
DLL3	0.854275
LOC400759	0.854253
UPK3B	0.853012
CHL1	0.852681
KCNA7	0.845734
RBP7	0.844009
KRT3	0.841736
FLJ42289	0.838881
ZNF385A	0.838628
CNNM1	0.838475
SERPINB7	0.837579
WNT5B	0.830552
CKMT1B	0.82931
SAMD9	0.82929
CD70	0.828998
CHRNB4	0.828408
RAET1G	0.827455
SLC6A11	0.824133
BLVRB	0.822864
MTSS1	0.822386
IL1A	0.817582
MFAP5	0.817465
ALDH1A3	0.816165
SULT2B1	0.815424
FOXD1	0.813187
SDPR	0.812817
PVT1	0.812181
C9orf3	0.812121
GJB3	0.811914
GRIN2D	0.811601
ZIC2	0.810744
UCN2	0.807778
ALCAM	0.80461
CBR3	0.804123
GPR144	0.803895
NMNAT3	0.799016
TMEM160	0.798218
IL1RN	0.796165
C11orf20	0.795182
PHLDA3	0.794389
XG	0.790205
CLDN8	0.7899
FRMD6	0.786977
GADD45A	0.784285
RPL18	0.783859
DEFB1	0.781374
TREM2	0.780003
BAALC	0.779416
AVPI1	0.778774
LOC254559	0.778457
ADAMTSL5	0.776697
FOSB	0.776177
LMTK3	0.774845
SLC6A2	0.773893
PRSS27	0.77356
FOSL1	0.771275
DUOX1	0.77046
FGFBP1	0.770034
ALKBH3	0.769295
C1orf170	0.769104
RAB38	0.76252
FABP4	0.761395
EXOSC5	0.761237
SRPX2	0.760479
B3GNT8	0.760347
FUT1	0.759837
TCAM1P	0.759764
IFI16	0.758544
SCEL	0.758349
DBP	0.755944
OSR2	0.7559
SLC6A15	0.755844
SLC37A2	0.754899
EDAR	0.754197
POMC	0.75409
CEBPD	0.754072
WNT7A	0.753812
FLT3LG	0.753177
ADM	0.751777
CDKN2B	0.750929
SLC13A5	0.750318
ITPKC	0.750077
ARHGAP23	0.749863
RBP1	0.749741
DENND2C	0.749192
KCNQ5	0.748871
MT2A	0.748448
ADH1C	0.748413
CEBPE	0.748108
RPL13AP3	0.745858
MX1	0.745039
C1orf116	0.744651
LOC729156	0.744398
SPRR2C	0.743401
COL17A1	0.742961
ACE2	0.742672
ALOX15B	0.742179
TBX6	0.741016
RRAD	0.740271
CXCR7	0.739526
IFI27	0.737683
SLC15A3	0.737304
TFR2	0.737297
KHDC1L	0.73684
CYP26A1	0.736415
GHR	0.736094
LEPREL1	0.734676
ZNF296	0.73464
IFIT1	0.73397
LIN7B	0.73376
TMEM171	0.733234
SLC10A6	0.732886
EML2	0.732277
TMEM27	0.73168
PRRT4	0.729459
KCNS1	0.728967
ASB2	0.726777
RDH16	0.720896
HTR7	0.719973
CXCR2P1	0.719055
MYBPHL	0.718912
SOX7	0.717675
TYMP	0.715244
RPL28	0.715241
OLFML2A	0.714554
SFTA1P	0.713742
PKP3	0.713479
WNT7B	0.713473
ARL4D	0.713407
BIK	0.712166
C1QB	0.711402
C3orf14	0.709181
P2RY6	0.708736
OAS2	0.707611
DGKA	0.707344
HPDL	0.706671
RPL13AP6	0.706391
SYNGR3	0.706129
ETHE1	0.704247
OAS1	0.703924
CAV2	0.702901
FAM83E	0.700847
RIMS2	0.700496
RAD51AP2	0.700183
PSAPL1	0.699668
PSCA	0.695629
AQP3	0.693634
SPRR2E	0.693203
TACR2	0.691476
APOC2	0.690724
DAPL1	0.690492
SLC16A2	0.689904
CYP24A1	0.688962
RPS19	0.68628
C21orf63	0.686059
ISG15	0.685004
CDKN2A	0.684513
S100A14	0.68451
MT1E	0.683889
RPL13A	0.682765
LYPD5	0.682011
KRT81	0.681861
PSAT1	0.679555
FMO9P	0.679195
TRMT12	0.678936
ABLIM3	0.678074
SMC1B	0.678058
EPHA4	0.677145
CST1	0.676769
PADI3	0.676712
CYP27C1	0.675155
GPR68	0.674779
S100P	0.674372
GNA15	0.67404
RTN2	0.672823
S100A11	0.671333
JOSD2	0.671315
NGFR	0.671288
FAM25B	0.671219
SYTL1	0.670805
RNF17	0.669251
POU3F1	0.669125
COLEC11	0.668333
PLEKHN1	0.666827
PERP	0.666405
COMTD1	0.666136
SLC27A5	0.665805
RPS5	0.664519
RNF212	0.661297
IFI44L	0.660219
PLCH2	0.659767
KRT1	0.659597
IFI6	0.659461
CAPN14	0.658654
MYCL1	0.657544
RND3	0.657501
GNG4	0.656047
C14orf162	0.655981
ADRB1	0.655774
FAM159A	0.655304
FBL	0.654648
FSCN1	0.654383
UGT2A1	0.653725
P2RY2	0.653576
GLS2	0.653089
MUC20	0.653
SUSD4	0.652639
C1QA	0.652157
LOC400696	0.651674
AADACL2	0.651115
APOBEC3A	0.650738
HORMAD1	0.650609
CLIC3	0.650229
CD109	0.648742
KRT33A	0.648608
NKX2-4	0.648488
HOXA4	0.648233
FGF11	0.648092
C10orf55	0.647467
PITX1	0.64743
HIST2H4A	0.64719
PLAU	0.647172
C19orf46	0.644502
C1orf161	0.644392
GNLY	0.64417
IFIT3	0.643648
CACNA2D3	0.643091
GLTSCR2	0.643031
LHFPL4	0.641778
CECR2	0.641245
SLC16A1	0.640633
P2RY1	0.640173
LANCL3	0.63961
CLTB	0.639515
ZNF541	0.639146
NCAM2	0.639128
EPS8L1	0.638736
AHNAK2	0.637528
FAM46B	0.636654
TTC9	0.636392
TBC1D2	0.636123
KCNH4	0.635562
TMPRSS11F	0.635491
SNRPD2	0.635257
CCDC61	0.634613
CLCA3P	0.634419
C19orf48	0.634127
C10orf91	0.633801
C10orf116	0.633546
STL	0.631096
CFD	0.631024
BOP1	0.630275
GPR1	0.630259
MYH16	0.63014
DUSP7	0.629861
MGC87042	0.629742
PIR	0.629703
AXL	0.627527
DHDH	0.627132
SPINK6	0.626243
AP2S1	0.625333
RPS11	0.625183
CLCN1	0.623662
LPCAT4	0.623466
TNFSF9	0.623389
PHYHD1	0.622535
C9orf122	0.620991
LGI3	0.620916
CAV1	0.619735
C14orf34	0.618027
HOXA1	0.617855
MT1L	0.617693
PAFAH1B3	0.617385
CDRT1	0.616918
APOL1	0.616868
SIK1	0.615858
CCL17	0.615589
GCLC	0.615518
ADORA2B	0.614944
PITX2	0.614496
HRG	0.614001
FAM181B	0.613887
OASL	0.613404
RPLP1	0.613156
MICALL1	0.612939
CXCL9	0.611979
CXCL11	0.611333
OTOP3	0.611305
EIF4EBP1	0.610922
CAGE1	0.610371
MDFI	0.609847
EPHX3	0.609218
S100A3	0.608993
FOXF2	0.608821
KRT77	0.60856
POLR2J3	0.608485
CA11	0.608186
RASL11B	0.606863
CENPP	0.606728
LOC341056	0.606189
GBP5	0.606096
HIST1H1C	0.605622
S100A12	0.605376
VAMP5	0.604666
TNFSF10	0.60411
HS3ST3A1	0.603984
PDLIM4	0.603984
RPS16	0.60396
CLIP4	0.60362
C12orf68	0.603388
CES1	0.603342
RPL35	0.603076
ANGPTL4	0.602897
PRR24	0.602267
LENG9	0.602153
ZNF524	0.601681
SLC44A5	0.601112
PHLDB3	0.600433
PLA2G2F	0.600342
FABP5L3	0.600272
DKK4	0.60002
DTX2	0.597976
IGFL2	0.597902
CBR1	0.59641
C22orf31	0.596246
LOC80054	0.596038
ATP13A5	0.595107
CBS	0.594652
DCXR	0.593752
DQX1	0.593722
HOXD10	0.593426
DPT	0.591936
COX6B1	0.590282
FXYD5	0.590259
HSPA2	0.589809
LOXL4	0.589684
NUDT11	0.589496
IRF6	0.589254
FGF8	0.588871
GSTP1	0.588546
SYNC	0.58698
AKR1B15	0.586975
BCAT2	0.586909
EFS	0.586875
MPPED2	0.585347
PHGDH	0.585326
RPL13AP20	0.585325
ANKRD57	0.585177
CGREF1	0.584953
SLCO3A1	0.584328
TRERF1	0.583644
RHOD	0.583618
SNCA	0.582452
CHST7	0.582377
PLP2	0.581755
FSTL4	0.581503
STOM	0.581284
NKPD1	0.579758
JPH1	0.579559
CNGB3	0.579519
SIGLEC1	0.57918
PVRL1	0.57706
SDCBP2	0.576632
C1QC	0.575942
TMEM200B	0.575342
GCNT3	0.575322
ID1	0.574915
DHRS2	0.574841
HIST2H2AA3	0.574625
C3orf16	0.574607
CTU1	0.574176
SEMA3F	0.573464
DCUN1D5	0.573029
TRIM16	0.572493
ANXA2P3	0.571869
FAM27C	0.571193
MALL	0.570771
SPESP1	0.569795
TFAP2E	0.569102
CCL21	0.567827
FAM27A	0.567724
SDS	0.567354
GLI4	0.567276
SCO2	0.567145
ADAM23	0.566852
JUB	0.566415
SECTM1	0.565159
HRAS	0.565148
BATF	0.565128
PDCD5	0.564724
LPAR6	0.564308
KLF5	0.564212
CBFA2T3	0.563917
ECM1	0.563753
TMEM63C	0.563583
AFAP1L2	0.563549
PRODH	0.563495
FOXQ1	0.563397
ANXA2	0.56266
NUDT8	0.561499
HMSD	0.561237
SLC38A5	0.561222
BDKRB1	0.560927
KRT10	0.560331
C20orf134	0.559822
TBX1	0.559714
MX2	0.559457
CLVS1	0.558928
GBP2	0.558199
PDLIM1	0.558094
CEL	0.558038
TKT	0.557888
NOSIP	0.557579
PVRL4	0.557484
PRNP	0.557455
ABHD12B	0.557048
TMPRSS11BNL	0.55698
C10orf114	0.55681
SDC1	0.556632
PLD4	0.556534
HES4	0.55633
GJB6	0.55607
SERPINE1	0.555607
MYOT	0.555526
FAM95B1	0.555076
ABO	0.554572
SERPINB10	0.553874
ZPBP2	0.552839
GPNMB	0.551481
LENG1	0.551314
GZMH	0.55106
CD44	0.550851
GLDN	0.550173
TMEM145	0.549642
SLC25A41	0.549438
DHCR24	0.549335
WNT4	0.548778
NRARP	0.548414
DSG4	0.547554
MRPS21	0.546619
FEZF1	0.546306
UBE2S	0.546028
SLC5A12	0.545011
ITGB4	0.544996
FCGR1A	0.544876
SLC6A9	0.544719
FSTL3	0.544554
NAPSB	0.544524
SLURP1	0.544252
C7orf10	0.544198
INPP1	0.544163
RIN1	0.543804
PDPN	0.543494
RPL8	0.543262
POF1B	0.542812
GZMB	0.542318
POU2F3	0.542017
C18orf26	0.541969
CAPNS1	0.541728
ETFB	0.541338
IFIT2	0.541256
C2orf71	0.541218
C19orf73	0.540963
PACSIN3	0.540898
IL29	0.540558
UPK2	0.54036
PIM1	0.539915
SGK1	0.539622
KCTD15	0.539619
SBSN	0.53888
FAM25A	0.538807
S100A16	0.538543
PLAT	0.537043
ANKK1	0.537005
RPP25	0.536775
VGLL3	0.536585
LRRC8A	0.535992
CXCL10	0.535447
NAA20	0.535347
RRAS2	0.534682
LY6E	0.533805
TRIB3	0.53372
HAS2	0.533458
CCL5	0.533433
RUVBL2	0.532944
EFNB1	0.532873
NEFH	0.532705
RPL37	0.532687
PCK2	0.532273
POLR2I	0.53218
HOXC13	0.531896
FOXA1	0.531208
JUP	0.53047
SERPINB12	0.530284
LOC100130691	0.529573
LOC541471	0.529486
PGLYRP4	0.529065
PRDX1	0.528675
GSTM2	0.528626
TMEM22	0.52824
OSGIN1	0.528007
TYROBP	0.527948
RPS17	0.527792
RBM42	0.527675
TXN	0.527662
C5orf39	0.526853
IRF7	0.526701
MMP10	0.526441
TAF7L	0.526404
WARS	0.526396
KLHL35	0.525464
BBC3	0.524521
EVPL	0.5238
ADH1B	0.523301
PRRG2	0.522874
RPPH1	0.522833
DHRS3	0.521706
GPX1	0.520679
ADAMTSL4	0.520117
FOLR3	0.51876
SCARA3	0.518519
HES5	0.517748
HOXA5	0.516362
VSIG10L	0.516255
RBP3	0.51613
GNB1L	0.515852
TPD52L1	0.514781
CCDC155	0.514757
ZNF581	0.513905
RPS27	0.51378
FZD10	0.513578
ALDH16A1	0.513455
NDUFA3	0.513092
PITX3	0.513
KCNJ14	0.512978
ETS2	0.512572
ETV7	0.512268
TMEM147	0.51217
SLC25A28	0.512149
CRYBB3	0.511856
RENBP	0.511814
TM4SF1	0.511432
NOTCH2NL	0.511225
LIN37	0.510983
PPP1R15A	0.510656
MRPS12	0.51062
ANKRD19	0.510468
C1orf177	0.510398
C9orf23	0.509902
LAMP3	0.509643
TRIM74	0.509634
SMAD3	0.509387
KLHDC8B	0.509209
HIST1H2BK	0.509164
TLL2	0.50904
ODZ4	0.509009
RPL29	0.508891
PARD6G	0.508204
LGALS3	0.507883
GLTP	0.507788
S100A10	0.507206
HSD17B3	0.506585
COL4A6	0.506444
SIGLEC14	0.50644
CBLC	0.506361
CDC42EP5	0.505598
CCDC9	0.50475
CSRP2	0.504687
MAF	0.504253
TUBB6	0.504009
PTPRQ	0.50387
C20orf54	0.503366
TRNP1	0.50239
BAG3	0.502273
RHBDL2	0.502162
FCGR1B	0.50169
PRR19	0.501664
GKN1	0.500884
ATP1B3	0.50073
CD177	0.500358
ARHGAP22	0.49974
PRPF31	0.499139
FBXO32	0.499085
TUBA4A	0.499084
HES7	0.498655
ASNS	0.498416
LSR	0.498371
IER5	0.497422
FAM83H	0.497236
RCL1	0.496765
REEP4	0.496635
KRTAP3-1	0.496424
ADAD2	0.496364
NR1H2	0.495933
UPB1	0.495842
BCL2L12	0.495341
SLC47A2	0.495102
AVEN	0.495086
SYCP2	0.494536
ABCC5	0.494181
ITIH5L	0.493839
CD3EAP	0.493814
IGFBP4	0.493797
LYPLAL1	0.493715
RRAS	0.493092
SDHAF1	0.493033
CYB5R2	0.492441
PMS2L11	0.492235
SYNM	0.492104
PSTPIP2	0.491857
APOC1	0.491845
GOLGA6L6	0.491783
CRYAB	0.49165
TM4SF19	0.491217
RGS2	0.491097
ISM2	0.490872
SCPEP1	0.49087
CEBPG	0.490543
B4GALNT1	0.49005
RPL4	0.489957
HIST3H2A	0.489746
FDXR	0.489708
RBM20	0.489553
FAM98C	0.488804
LAYN	0.488791
HCG4	0.488098
KRT33B	0.488072
NFKBIB	0.487992
YDJC	0.487938
NUDT19	0.487588
LAMA3	0.48744
CTLA4	0.48692
IFITM1	0.486742
RPS9	0.48664
CATSPER1	0.486341
ETV2	0.486252
ASS1	0.486203
ISOC2	0.486077
INE2	0.4857
C3orf57	0.4857
CTHRC1	0.485351
C12orf70	0.485323
UGT1A8	0.485289
RASSF10	0.485226
NKX2-8	0.484664
RPL18A	0.483962
GDAP1	0.483221
BNIPL	0.48313
KLF4	0.483048
PTRF	0.482325
BAG1	0.482323
CYP2C18	0.482147
NAPA	0.481813
ZYG11A	0.481432
C15orf48	0.480644
ABCA17P	0.480394
ALOXE3	0.47994
LOC286467	0.479649
PPM1J	0.479561
DDB2	0.479553
CHIT1	0.479174
ANXA2P2	0.479121
RPS2	0.478689
ADH1A	0.478464
C15orf63	0.4783
INPP4B	0.477698
TRIML2	0.477537
LRRC4	0.477324
C11orf83	0.477209
PRRG4	0.47683
FBXW10	0.476494
RPL39	0.476276
RPS24	0.476198
LPAR5	0.475794
TRIM6	0.474991
RADIL	0.47491
ZNF593	0.474413
FAM110A	0.474341
FTL	0.474186
GPR111	0.474021
IGFL3	0.473837
IFITM3	0.47345
TPRG1	0.472975
TBCB	0.47271
KCNJ15	0.472701
LOC150381	0.47191
F12	0.471888
SLC1A3	0.471635
RPS3	0.4712
ASPG	0.470682
LY86	0.470274
TRAPPC2P1	0.469437
HSPBP1	0.469288
FGF19	0.469181
GAS5	0.468028
ANKRD20A3	0.467564
SRCRB4D	0.467455
GOLGA6L1	0.467232
SCNN1A	0.467161
HS6ST2	0.46693
C15orf41	0.466866
SAE1	0.466799
TSPO	0.466378
MAP7D2	0.466187
KRT80	0.465025
SLC25A21	0.464577
LOC100130776	0.464457
LOC100126784	0.464382
SNHG6	0.464102
ANKRD29	0.463918
SLC20A2	0.463804
CTSH	0.463562
SURF2	0.463409
RPS15	0.463307
RPS4X	0.463058
F3	0.462498
WBSCR26	0.462349
C4orf26	0.462302
H2AFJ	0.461823
PSENEN	0.461287
KREMEN1	0.46117
TRPV4	0.460675
LRFN1	0.46024
LOC100133669	0.45992
FMO2	0.459897
GLTSCR1	0.459847
PLS3	0.459669
RPL12	0.459427
ZNF784	0.459235
KLHL21	0.458668
LYPD2	0.458192
HN1	0.457859
C1orf74	0.4574
EIF5A2	0.457192
HOXA9	0.457004
PDCD2L	0.456862
TSPAN1	0.456438
SH2D3A	0.456146
TSKS	0.455995
FIGF	0.45571
TLX2	0.45552
RINL	0.455262
HOXD4	0.455012
ST6GALNAC2	0.454754
PLN	0.454735
PRKD2	0.454663
KEL	0.454591
UPP1	0.453987
CSDA	0.453574
C6orf41	0.453151
RPL13	0.453077
GPR78	0.453061
DEF6	0.45306
AADAC	0.452451
GRWD1	0.451974
ANKRD34B	0.451687
ATF3	0.451501
FAM83F	0.451303
RIPK4	0.450927
IL28A	0.450735
TPTE2P1	0.449997
ALKBH6	0.44954
GEMIN7	0.449015
ERCC1	0.448836
FCER1G	0.448583
TOMM40	0.447927
LOC440957	0.447778
SERTAD1	0.44773
EIF6	0.447458
ZNF787	0.447364
STON2	0.446856
RPL36A	0.446715
STATH	0.44663
NUDT1	0.446264
CYP2F1	0.445994
KRTDAP	0.4457
CHAC1	0.445324
C2orf74	0.445165
RPS29	0.444963
CAPG	0.444722
RPL32	0.44455
TMEM52	0.444354
C7orf40	0.444334
NPL	0.444026
CYP26C1	0.443848
OTOP2	0.443786
CPA4	0.443582
HDDC3	0.44357
RPS6	0.443528
MAMSTR	0.442869
FCGR1C	0.442777
KIR2DL4	0.442456
GCET2	0.442091
GZMA	0.441892
APC2	0.441887
TEPP	0.441822
PIK3IP1	0.441679
TREX1	0.441676
SLC31A2	0.441214
IRF9	0.440603
IFI27L2	0.440466
EFNA3	0.440303
FBXO6	0.439932
C1QL1	0.439851
SNRPB	0.439528
ZNHIT2	0.439477
DNASE1L3	0.438958
RNF217	0.438778
MRM1	0.43869
ELF3	0.438003
PTK6	0.43794
GTF2A1L	0.437111
STRN4	0.436644
LPA	0.436411
CLEC2A	0.436246
C10orf54	0.436102
ANXA2P1	0.435912
CHST9	0.435574
CCDC80	0.435284
EPHA2	0.435263
SERPINF2	0.434994
ZDHHC12	0.434492
EIF3K	0.434139
TGFB1	0.433413
C17orf99	0.433212
MFSD2B	0.433145
CLN6	0.433123
RNF39	0.433094
TNFAIP8L3	0.432857
ZFAND2A	0.432747
ENDOG	0.432472
JAG1	0.432419
NAPRT1	0.432387
CD8A	0.432333
POLD1	0.432117
GABRQ	0.432096
ALOX12	0.432047
RPL36AL	0.431547
CD9	0.43138
TMEM79	0.431332
HOXD8	0.43059
NTN5	0.430459
H19	0.429696
ADORA3	0.429405
OSCAR	0.429053
VAMP8	0.429013
FBXO2	0.428692
TALDO1	0.428521
SYT1	0.428447
PRMT1	0.428175
FZD9	0.428053
PPP1R14B	0.427092
CTSW	0.427068
CTF1	0.426132
RPL27A	0.426104
YAP1	0.425629
PAPL	0.425224
DHRS4L2	0.425004
ADAMDEC1	0.424941
CD274	0.42475
RPL3L	0.424431
TMEM143	0.423969
C1R	0.423782
CYP3A7	0.423176
GNGT2	0.422874
KRT79	0.422593
CSTB	0.422334
ODF3B	0.422303
RSAD2	0.422301
TIMM50	0.422216
RPLP2	0.422179
HSBP1L1	0.421763
SLC12A6	0.421752
TRAF3IP3	0.420885
NOP10	0.420881
CIDEB	0.420355
LPAR3	0.419803
EFHD2	0.419597
TMCC3	0.418842
MYPOP	0.418829
C17orf44	0.418705
CARD14	0.418449
PLA2G2A	0.418363
ZNF683	0.418339
ELOVL3	0.418231
CYP19A1	0.4179
HCST	0.417891
C15orf61	0.417647
VMO1	0.417424
RPLP0	0.417269
ACP5	0.417152
EXOSC4	0.4165
GAMT	0.416487
HTRA3	0.415457
SCN2A	0.415452
HSPA4L	0.415135
ANKLE1	0.414979
NCF2	0.414713
NCRNA00152	0.414598
RAP2B	0.414365
KPTN	0.41355
TGM6	0.413386
ADAMTS17	0.413379
CCDC85B	0.413321
GALNTL4	0.412779
CSF2RA	0.412712
NCRNA00116	0.41215
RPL27	0.412134
HIST1H2BO	0.412025
SQRDL	0.412003
SPHK1	0.412002
IP6K3	0.411851
LST1	0.411818
NACAP1	0.411799
SLC6A14	0.411514
GIPC2	0.410803
IRF3	0.410376
PSMG1	0.410053
NME2	0.409925
BLCAP	0.409869
SLC2A9	0.409703
TSEN34	0.409658
EIF4EBP3	0.409453
POLE2	0.409283
HSD17B1	0.408952
BICD2	0.408814
MYL7	0.408739
ALDOC	0.408429
MPZL2	0.407528
BAIAP2	0.407528
CCDC51	0.407439
FUT6	0.407238
CCBE1	0.40719
PRDX5	0.407129
DMRTA2	0.407008
HAMP	0.40699
PRSS22	0.406939
CLDN7	0.406785
GLUD1	0.406629
ABCA12	0.406525
RGS1	0.406469
LSP1	0.406378
CAMK2A	0.406103
RDH13	0.406076
USF2	0.405848
HUS1B	0.405667
TNNT1	0.404755
PMAIP1	0.404304
LOH3CR2A	0.404031
C1QTNF4	0.403641
ARL11	0.403527
COX5A	0.40292
RPLP0P2	0.402536
UBE2M	0.401978
TMEM91	0.40169
DDX43	0.401659
NCF1	0.401571
CD300LF	0.40107
TSC22D3	0.400216
HTRA4	0.399731
RRS1	0.399671
NR2C2AP	0.399146
KRT86	0.399052
ARHGEF4	0.398675
PLAC1	0.39857
NMB	0.398418
GBP1	0.398364
EBP	0.398043
DEFA5	0.397977
MRPL12	0.397937
NNMT	0.397821
WIF1	0.397772
GPRC5D	0.397586
TBX3	0.397551
XK	0.39748
IL1F9	0.397353
ATPBD4	0.397125
EXOSC7	0.396684
GIPC1	0.396603
CD3D	0.396593
PRR5-ARHGAP8	0.396584
CD101	0.396059
GPAT2	0.395939
SEPW1	0.395536
SLC3A2	0.395315
WHAMML1	0.395178
CHMP2A	0.394933
VSTM1	0.394919
IFNK	0.394433
FAH	0.394078
RTKN2	0.39397
PGD	0.393886
AKR1E2	0.393528
INO80C	0.393479
RPL7A	0.393194
TDRD12	0.393125
GRP	0.392947
BEST2	0.392847
UGT1A3	0.392629
CYP2C9	0.392531
CDT1	0.392407
RPS8	0.39231
RIN2	0.391929
GIYD2	0.391841
KYNU	0.39144
LAD1	0.391108
CD7	0.391027
TIMP3	0.390673
ANXA1	0.390586
RNASE2	0.390555
MRPS24	0.390272
EMP1	0.390178
PAK6	0.39
MATK	0.389984
SMAGP	0.389974
RPL23	0.389796
HSPB6	0.38966
RGMA	0.389557
GPATCH1	0.389196
RNF19B	0.389132
ITPRIPL1	0.389007
YIF1B	0.388906
TMEM85	0.388824
TTLL12	0.388238
SUSD3	0.387905
ASCL2	0.387578
ALKBH2	0.387349
SIRPB2	0.387327
IRAK2	0.387219
APOE	0.38689
BCL11B	0.386558
MMP12	0.386527
PNKP	0.386216
RPL23P8	0.385938
C19orf47	0.385824
REEP6	0.385811
PPPDE2	0.385653
KCNK7	0.385508
C11orf93	0.385444
STX11	0.385302
FGFR3	0.385068
CES2	0.385024
RPL31	0.384731
IFIT5	0.384666
RPSA	0.38437
RPL24	0.384203
C9orf114	0.384111
RPL38	0.384011
CYP2J2	0.383511
SRXN1	0.383477
EPHX2	0.383128
NOP56	0.382625
C17orf64	0.38245
FBXO46	0.38241
IMP3	0.382304
IDO1	0.381883
RPL19P12	0.381434
SH3BP1	0.381236
C16orf73	0.381218
LIG1	0.381164
PABPC1	0.380386
FCGR3A	0.38019
MCTP2	0.380039
TMIGD2	0.379841
CPNE7	0.379566
ESRRA	0.379255
AKT1S1	0.378725
LAIR2	0.378192
EAF2	0.37784
CYP2B7P1	0.377522
C15orf27	0.377221
SARS	0.377036
MRPL48	0.376893
VSTM2L	0.376875
METRNL	0.376764
STYK1	0.376511
FUT3	0.376468
BLOC1S2	0.3763
OLFM1	0.376092
WNT16	0.376031
PSG3	0.376014
FLJ45983	0.375749
TPST2	0.375317
MVK	0.375298
RAB25	0.375172
DST	0.375091
CD86	0.375083
TXNDC17	0.375007
TP53TG1	0.374894
BAX	0.374878
GNAL	0.374875
H1F0	0.374648
NME2P1	0.374643
PRR5	0.374478
TMEM149	0.374356
MBD2	0.374347
ITGA2	0.374309
NAT8B	0.374245
AMN	0.374064
PPP5C	0.373963
YARS	0.373827
MRPS17	0.373724
C20orf27	0.37364
CNN1	0.373558
NEFM	0.373476
NXT1	0.373414
TAX1BP3	0.373159
RPL30	0.372878
IL17RE	0.372557
C1orf162	0.372488
POLE4	0.372484
STOML1	0.372374
LOC440173	0.372245
TIGD5	0.371581
RPS20	0.371572
CYP7B1	0.371509
DHRS9	0.3713
POMZP3	0.370985
C22orf23	0.370847
LOC285548	0.370798
C6orf218	0.370763
SCAF1	0.370592
BTG1	0.370529
MACROD1	0.370297
TRPM4	0.370124
KRT39	0.369522
KRT40	0.369499
IFI44	0.369431
FAM24B	0.369265
GPR83	0.368594
FMO6P	0.368492
HOPX	0.368449
LOC100271831	0.368202
NR5A1	0.368142
CCL4	0.367918
PKD2L1	0.367826
BST2	0.367791
ITPRIP	0.36779
MID1IP1	0.367735
HAUS4	0.367675
CHCHD10	0.367542
PRRX2	0.367352
ZNF579	0.367248
IL15RA	0.367051
TNNT2	0.367033
LOR	0.366898
C19orf61	0.366755
ADK	0.366585
CCL19	0.366346
RPL36	0.366123
OOEP	0.366063
RPL19	0.365968
HS6ST1	0.365946
LIMK2	0.365929
HOMER3	0.365899
AMPD3	0.365783
FBXO22OS	0.365679
MTERF	0.365667
PAQR7	0.365588
ALS2CL	0.365567
DNAJB1	0.365332
UBA52	0.365093
RNF126	0.365036
ALDH3B2	0.364943
TNFAIP8L2	0.364742
PHEX	0.364741
PPFIA3	0.364693
UBC	0.364662
ANKRD56	0.36458
IRF5	0.364535
EMP2	0.364096
NME1	0.364063
LIPE	0.363975
HBEGF	0.363917
GZMK	0.363882
EPAS1	0.363836
ECH1	0.363813
SIRT7	0.363752
MUC15	0.363229
GEMIN8P4	0.363227
B3GALT6	0.363076
HIST2H2AC	0.362945
SIGMAR1	0.362832
BLVRA	0.362659
FAP	0.362616
RPL14	0.362148
C19orf60	0.362026
FMO4	0.361719
TBC1D3C	0.361662
HERC6	0.361638
DEDD2	0.361559
RPS13	0.361428
VGLL1	0.361407
MAGEB2	0.361277
LOC100132724	0.361257
C17orf89	0.361184
LY96	0.361063
ART4	0.360713
PPP1R1C	0.360536
LOC388796	0.360425
CYP3A5	0.360167
ZNF580	0.360005
C9orf89	0.359926
KDM4DL	0.359912
RPSAP58	0.359746
CYP2A6	0.359527
ZFP36	0.359491
PRICKLE3	0.359448
LOC157381	0.359385
WDR74	0.359342
ARHGDIB	0.35922
NACA	0.35921
DLX5	0.35916
HMGA1	0.359135
LOC606724	0.359124
EEF1D	0.358872
BZW2	0.358809
FAM108C1	0.358727
DOK2	0.358082
NPM2	0.35804
NACA2	0.357327
CPA5	0.35729
EIF3M	0.357226
RTP4	0.356719
ZP3	0.356697
PSMG4	0.356591
LGALS9C	0.356563
SNHG5	0.356558
EXOSC1	0.356159
PML	0.356144
SSNA1	0.355873
VDAC2	0.355814
PGPEP1L	0.355574
SULT1E1	0.35553
RPS26	0.355514
PARP12	0.355394
HSPA6	0.355228
RPP21	0.355141
RIPPLY2	0.355003
SOST	0.354946
HPD	0.354903
ABI3	0.354896
PSME2	0.354708
ARHGEF33	0.354655
C6orf142	0.354488
ABHD4	0.354294
SMAD5OS	0.354255
ZNF219	0.354211
NFE2L2	0.354154
AURKC	0.354081
KRT7	0.354068
NSMCE2	0.354045
LOC100270710	0.354035
WNT3A	0.353493
TRIM28	0.353403
TARSL2	0.353222
AKR1B1	0.353173
TMEM216	0.353158
CCDC12	0.353114
NME1-NME2	0.353044
HSD17B8	0.352257
MTUS2	0.352062
STEAP1	0.351999
ST20	0.351904
MED6	0.351819
PCDH15	0.351745
UCK2	0.351492
KLHL13	0.351387
CCDC64	0.350949
ACCN2	0.350898
GNAT1	0.350867
RARG	0.350616
C14orf126	0.350598
SHFM1	0.350566
CDCA4	0.350563
HLF	0.350435
SIGLEC8	0.350366
EIF5A	0.350298
HSD3B1	0.349982
ARNTL2	0.349933
HIST1H1B	0.349569
RNH1	0.349143
MRPS2	0.348816
FHOD3	0.348511
ANAPC11	0.348126
RPS18	0.348028
HIST1H2BE	0.347964
CARS	0.347867
CNTNAP2	0.347812
CCL22	0.347681
SEC1	0.34759
ACTN4	0.347561
SLC34A1	0.347455
KPRP	0.347271
APOL2	0.347221
LOC283404	0.347207
RDH10	0.347182
GCHFR	0.347169
GZMM	0.347135
APRT	0.347036
CA12	0.347028
CDK6	0.346969
CGB1	0.346959
CASP1	0.34688
ACOT7	0.346775
TMEM154	0.346494
NOP16	0.346321
CDKN1A	0.346254
PDE2A	0.346092
AIF1	0.345639
HIST1H2BD	0.345605
ERMP1	0.345531
ELMO3	0.344837
SHARPIN	0.344449
RAB4B	0.344203
DHX34	0.344159
MAGOH	0.34393
TIPIN	0.343783
ATF4	0.343675
C11orf17	0.343605
MMP23B	0.343501
NHEDC2	0.343332
UGT1A1	0.343214
MYH14	0.343195
GRIN2C	0.342904
SIGLEC11	0.342859
RNF152	0.342816
TAGLN	0.342753
LAIR1	0.342679
ITIH3	0.342641
MRTO4	0.342631
RAB33A	0.342562
FAM128B	0.342435
XAF1	0.34206
IFNG	0.341992
GDF15	0.341966
ZMYND19	0.341822
SORD	0.341185
HAUS5	0.340885
SUGT1P1	0.340794
SLC25A6	0.340683
LSM7	0.340663
EID2	0.340652
C11orf73	0.340481
CROT	0.340047
CD1A	0.339834
HTATIP2	0.339832
ZBTB45	0.339618
C6orf132	0.339595
GJA9	0.339345
FGL2	0.339168
RPS2P32	0.33916
LRMP	0.338988
PROM2	0.338883
FGF4	0.3386
PA2G4	0.338492
COX6A1	0.338352
C10orf47	0.33834
PI16	0.338203
HOXD3	0.338174
ANKRD35	0.337891
C21orf15	0.33769
RPS21	0.337556
CINP	0.337538
RPS7	0.337531
RASA4P	0.337405
MTHFS	0.337365
TMEM41A	0.337313
ZBED2	0.337267
HIST2H3C	0.336844
GSTA1	0.336787
ARSF	0.336736
GATA3	0.336689
EPB41L1	0.336676
SDR42E1	0.336376
FKRP	0.336324
DPM2	0.336134
CHCHD5	0.335903
FAU	0.33534
ARL14	0.334936
TMEM189-UBE2V1	0.334853
PUSL1	0.334798
CLECL1	0.334611
FGD3	0.334508
CCL14	0.334365
PLSCR1	0.33436
ANKRD24	0.334342
CHCHD8	0.334233
PPP2R1A	0.333652
LOC201651	0.333479
CDA	0.333356
DUSP9	0.3329
JUNB	0.332736
PHF19	0.332712
CSDAP1	0.332623
DPP7	0.332619
NHP2L1	0.332452
ZNF574	0.332227
RRP1	0.332118
RASSF5	0.332085
INO80B	0.331906
MAL2	0.331848
NR1D1	0.331323
DNLZ	0.331238
ZDHHC18	0.331098
C6orf114	0.330897
SEMA4B	0.330653
CXorf42	0.330643
SIGLEC16	0.330434
XKR6	0.330326
CIB1	0.33032
DHRS4	0.330309
PIH1D1	0.330076
ORMDL2	0.329888
PDCD1	0.329485
BLOC1S3	0.329405
PSMB9	0.329388
TEAD4	0.328818
U2AF1L4	0.328808
TCP11	0.328735
UBE2MP1	0.3287
EIF5AL1	0.328641
CENPM	0.328582
HES1	0.328357
MN1	0.328083
COMMD4	0.328029
XKR9	0.327891
PTMS	0.327844
CTRC	0.3277
BOLA3	0.327673
MYH11	0.327373
C8orf55	0.327225
ANXA10	0.327118
HRK	0.327072
ZNF534	0.326856
EPSTI1	0.326712
VILL	0.326679
CYB5R1	0.326471
POLR2F	0.326328
GPRC5A	0.326287
GFOD1	0.326173
ANKRD27	0.32587
DNAJB3	0.325836
GBX2	0.325798
IGF2BP2	0.32575
METTL8	0.32563
IRF2BP1	0.325397
ITPA	0.325242
RPL41	0.325197
TMEM126A	0.325032
PRG1	0.324811
GPI	0.324786
MGC70857	0.324659
C15orf40	0.324316
PPP1R12C	0.324264
RNASE6	0.323954
TAF1D	0.323889
METTL5	0.323812
CA2	0.323514
MRPL24	0.323088
C1orf31	0.323038
EPN3	0.322928
TK1	0.322573
MS4A6A	0.322214
PRIM1	0.32208
PSG2	0.322043
LDHC	0.321998
KLK12	0.321739
PTPRH	0.321358
RYR2	0.321276
GP6	0.321138
C22orf9	0.321135
AP2A1	0.320992
MYL12B	0.320872
ATP5SL	0.320751
AP3B2	0.320641
SH2D2A	0.320555
RP1L1	0.320516
CCDC124	0.320413
ZC3H8	0.320363
BASP1	0.320237
CENPW	0.320191
LRFN3	0.32
VIPR1	0.319737
NDUFB9	0.31964
SYMPK	0.319489
C2orf27A	0.319356
ANKRD20B	0.319327
MPP1	0.319162
RPS26P11	0.318992
CCBL1	0.318906
PSMD8	0.318823
NDNL2	0.318695
UGT1A4	0.318562
SHKBP1	0.318555
ARHGEF1	0.318458
IMP4	0.318243
MAP3K6	0.318186
HSF2BP	0.318169
TGM4	0.317869
MYO5A	0.317724
ANXA11	0.317723
MRPL40	0.317714
SLC9A9	0.317649
LILRA4	0.317606
TRADD	0.317595
MEI1	0.317471
RPL21	0.317424
EDF1	0.31738
NBL1	0.317305
TFAP2A	0.31719
RHOG	0.317174
ARRDC2	0.317171
NT5C	0.317163
RNF141	0.316617
TMEM54	0.316405
RPL23AP7	0.316384
HIST1H2AJ	0.315995
NKG7	0.315701
GREM1	0.315675
ZNF416	0.315508
DDX49	0.315433
ZNRD1	0.315061
FOXL2	0.314759
DES	0.314693
TIMM9	0.314658
ZNF365	0.314649
RPL35A	0.314451
STAT1	0.314405
ARRDC5	0.314238
SIRPG	0.314049
USP31	0.313964
C20orf199	0.313822
TSTA3	0.313814
KRTCAP3	0.313794
CXCL14	0.313734
PRDM12	0.313567
C16orf75	0.31342
RPL23A	0.313316
NKX1-2	0.313223
SPRR4	0.31318
LYL1	0.313147
HIST1H3G	0.312878
STAP2	0.312787
HSF1	0.312712
POLR2J4	0.312607
KLRC1	0.312245
MRPL21	0.312192
PPIAL4G	0.312167
PAF1	0.312083
POLR1E	0.312056
RHOC	0.311921
HAVCR2	0.311847
SRM	0.311835
GSTO2	0.311775
LHB	0.311693
CCDC101	0.311668
ENTPD3	0.311628
ZNF600	0.311518
POU4F1	0.311225
PSMC4	0.310866
C9orf16	0.310728
LTB4R	0.310481
ZMAT5	0.310436
LAG3	0.310302
RFPL1S	0.310264
UCA1	0.310183
NGDN	0.310083
VPS28	0.309985
FANCE	0.309881
DUSP13	0.309881
ATP6V1F	0.309861
RPL22L1	0.309587
PTPN13	0.309521
HOXD9	0.309195
PSMA4	0.30914
THEM5	0.309138
PUS1	0.309034
H1FX	0.309011
DYSFIP1	0.308893
RPL10	0.308875
PGLS	0.308656
NPSR1	0.308652
MPP3	0.30843
ZNF565	0.307925
KIAA0020	0.307872
SPI1	0.307433
C12orf57	0.307428
CD14	0.307307
MRPS15	0.307098
STRA13	0.306995
C9orf125	0.30691
UBE2L6	0.306834
EMP3	0.306776
SLC25A5	0.30676
RPL11	0.306741
ULBP1	0.306725
LYSMD4	0.306395
C6orf122	0.30631
SERTAD3	0.306204
C1orf172	0.306202
POLR1D	0.306103
LOC152024	0.306027
SLC10A3	0.306025
SLC2A1	0.306006
CCDC144NL	0.30595
KCNMB1	0.305929
PEX16	0.305852
TYSND1	0.305778
LOC100125556	0.305668
MRPL14	0.305346
HIST1H1E	0.305149
CD48	0.305111
C11orf67	0.305081
MRPL52	0.304995
TAF10	0.304952
GPR110	0.304846
FAM26F	0.304767
CDH3	0.304735
CES4	0.304664
SLC25A43	0.304568
ALG3	0.304538
EGLN2	0.304498
BCL3	0.304474
ITGA6	0.304344
TMEM109	0.304271
TRUB2	0.30423
PSG6	0.304053
CHODL	0.304044
NDUFA12	0.30404
VASP	0.303879
NSDHL	0.303851
NSFL1C	0.303758
BCL6	0.303448
DCI	0.303338
BUD31	0.303134
EMG1	0.303115
ECE2	0.302969
LOC80154	0.302832
TOP1MT	0.302476
SYCE1	0.30226
GPR158	0.302003
ZNF408	0.301819
GAD1	0.3018
PDCD1LG2	0.30179
SNRPF	0.301732
GSTO1	0.301686
MGC14436	0.301657
G6PD	0.301632
HIST1H4H	0.301392
MCC	0.30133
EFCAB1	0.30126
C19orf40	0.300839
NDUFB7	0.300471
SLC39A4	0.300376
IL28B	0.300275
CYP27B1	0.30026
FOXD4L6	0.300123
ICOS	0.299827
BCL7C	0.299809
SPINT1	0.299738
TMIE	0.299641
IL11	0.299566
PNMA5	0.299533
CCM2	0.299502
CD300LB	0.299126
PSMB3	0.299086
CDH26	0.299081
C14orf156	0.29897
MAP6D1	0.298922
OSTF1	0.29862
C19orf53	0.298558
TOMM20L	0.298423
URM1	0.298422
MRPS26	0.298412
TRMT112	0.298401
NRM	0.298381
SLC7A5	0.298312
LILRP2	0.298305
PLA2G4C	0.298239
MTHFD2	0.298084
ACOT1	0.297941
MARK1	0.297891
CLDND2	0.297788
MGC16275	0.297726
ABHD1	0.297663
ADCK5	0.297514
GLRX2	0.297462
SERF2	0.296879
CDCA7L	0.296797
GTF2A2	0.296787
PPAN	0.296626
NUP62	0.296521
ERCC2	0.296257
RSL24D1	0.296224
TRIM22	0.296166
MGST2	0.29614
DDIT3	0.295996
LAMB2L	0.295908
[truncated: 18,503 more rows]

## Sheet: CHOL
GeneSymbol	logFC
MSLN	6.36817
AGR2	5.79575
OLFM4	5.53385
PPP1R1B	5.36282
UGT1A10	4.99282
MUC16	4.77021
CXCL5	4.58725
TRIM29	4.56411
CEACAM5	4.46103
EVPL	4.36536
KRT17	4.34689
DMBT1	4.33541
CEACAM6	4.29935
KLK6	4.20414
ERN2	4.13541
KRT16	4.03031
VWA2	3.93159
IBSP	3.86703
SERPINB5	3.82704
SEMA3C	3.82297
SFRP2	3.74585
SLC6A14	3.7018
KRT6B	3.66595
STRA6	3.63542
UGT1A8	3.59679
KLK10	3.57559
S100P	3.56468
GPRC5A	3.5252
CDH3	3.5128
ABP1	3.49698
BMP7	3.37747
PEG10	3.34928
SLC44A4	3.29413
HS6ST2	3.27588
FAM83B	3.23774
ST6GALNAC5	3.21532
TCN1	3.21131
AGR3	3.18206
COL17A1	3.17982
RASSF10	3.16838
SLC7A5	3.16186
KCTD14	3.11297
IGF2BP1	3.1054
GALNT5	3.07217
GGT6	3.06791
MMP12	3.05989
CRISP3	3.0552
FXYD3	3.03147
MUC5B	3.01059
LIPH	3.00883
ITGB6	2.99841
COL9A3	2.99671
PROM2	2.99543
SLC2A1	2.99172
CTSE	2.9831
SLC44A5	2.97621
KRT14	2.95503
GPR115	2.93548
PTGS2	2.93107
COL11A1	2.92043
FRMD5	2.90322
LOC100124692	2.90266
SLC1A5	2.8932
HOXC9	2.87605
FAM83A	2.84325
GABRP	2.83895
KRT15	2.82776
LEMD1	2.82677
TMPRSS4	2.81105
CARD14	2.79931
TBX18	2.79773
INHBA	2.79376
MME	2.78411
FAM83E	2.76047
PLEKHG4B	2.75664
C20orf114	2.75491
PLA2G4F	2.74525
UPK1B	2.74469
GREM1	2.73707
MFAP5	2.71657
C12orf36	2.70437
TMEM40	2.69884
BCL2L14	2.69401
EPHB2	2.68925
VGLL1	2.68481
TMPRSS3	2.68196
RIMBP2	2.6801
MMP1	2.67604
FGF9	2.67263
KIAA1199	2.66971
NEGR1	2.6589
PITX1	2.6587
EN2	2.65693
GPR109B	2.64969
LY6D	2.63115
RNF186	2.62802
EDIL3	2.6234
VILL	2.60252
TSPAN8	2.59929
ALDH3B2	2.59763
MGAT3	2.59342
EPN3	2.5919
C6orf15	2.57705
IGSF1	2.57425
DACT2	2.5715
PTPRR	2.55984
GALNT7	2.5567
MFI2	2.55575
CDKL5	2.55172
OVOL1	2.55114
C11orf53	2.54954
CLIC3	2.54765
COX6B2	2.53956
CA4	2.53591
TMPRSS13	2.50793
NDP	2.50743
CALB1	2.49852
PSCA	2.49757
FOLR1	2.49598
C10orf81	2.49501
FLRT2	2.49448
CXCL17	2.49394
FGFBP1	2.48506
UGT8	2.47796
PKP1	2.47779
HOTAIR	2.47612
SLC9A2	2.47587
LMO3	2.47489
AQP5	2.46553
HOXD9	2.46156
ODZ3	2.45015
FAM3D	2.44989
B4GALNT3	2.44779
PAPPA	2.446
TMED7-TICAM2	2.44141
CXCL3	2.43795
TDRD5	2.42442
KCNK9	2.42308
CCDC144B	2.42166
ENTPD3	2.421
HOXA10	2.41678
WNT2	2.41574
DQX1	2.41129
SLC6A20	2.40206
PRR11	2.39927
TBC1D3G	2.39791
EPPK1	2.3974
TCL6	2.39557
ADAMTS14	2.39159
KCNH8	2.38292
ATP2C2	2.37479
MMP9	2.37328
MYEOV	2.37237
MUC4	2.36926
EDAR	2.35997
PI3	2.35909
ITGB8	2.35643
KRT6A	2.35343
EREG	2.35081
LOC440905	2.34252
ST6GALNAC1	2.34141
KLK1	2.34141
WNT7B	2.33446
FAM71E2	2.31988
HOXC10	2.31788
SOX2	2.31606
FER1L4	2.31235
SALL4	2.31077
MDK	2.30925
PVRL4	2.30895
PCDH7	2.30565
ADAMTS12	2.30293
CYP26B1	2.30062
POSTN	2.2986
ALOX5	2.29623
FAM190A	2.29164
SPERT	2.28666
MGAT5	2.28131
RTL1	2.28035
TMEM92	2.27575
MUC15	2.27265
PRAME	2.2671
TMEM45B	2.26375
SCN5A	2.26279
IL1A	2.25701
COMP	2.25458
SCUBE3	2.2504
CNTNAP5	2.24977
RHBDL2	2.24703
GUCY1B2	2.2401
FUT2	2.23497
VSIG2	2.22689
CLDN4	2.22086
SEMA3A	2.21816
IL6	2.21774
FUT3	2.21324
IL20RA	2.19516
DNAH11	2.19218
CSF3	2.19103
MALL	2.18808
ST6GALNAC2	2.18367
MMP13	2.18264
AHNAK2	2.18256
VCAN	2.17952
CDX2	2.1789
PTGES	2.17563
GAD1	2.16983
IGF1R	2.16637
RARRES1	2.16629
LOC100127888	2.16394
EGF	2.1635
APCDD1L	2.1604
BMPR1B	2.16018
SPOCD1	2.15967
ABCA13	2.1596
HK2	2.15787
EGR2	2.15669
DIO3	2.15617
SYT12	2.15406
CPA4	2.15288
TSPAN1	2.1512
C9orf152	2.1508
SCNN1A	2.15028
TNS4	2.14676
ATP10B	2.13811
KLK8	2.1366
TREM1	2.13628
VGLL3	2.13072
ROBO2	2.1258
NMU	2.12535
TMC7	2.12478
HOXC11	2.12125
PADI1	2.12074
LRP8	2.10976
ITGA3	2.10941
FERMT1	2.10452
LY75	2.1022
EPHB3	2.09321
ZNF813	2.0903
C19orf59	2.08996
MYO3B	2.08966
KRT5	2.08958
GPR109A	2.08526
CBLN2	2.08097
TMEM144	2.0793
ZDHHC20	2.06387
SLC5A1	2.05642
ZNF750	2.05584
TTYH1	2.05531
C1orf110	2.05016
KLF5	2.04831
SCEL	2.04769
TFAP2A	2.04022
ITGA2	2.03949
GJB4	2.03826
ACOT11	2.03712
NFE2	2.03544
SERTAD4	2.03526
ELF5	2.03446
REG1A	2.03357
LOC641298	2.03279
MKRN3	2.03261
ADAM12	2.03164
CYP24A1	2.03132
SH3TC2	2.02496
WFDC2	2.02451
HR	2.01937
C19orf33	2.01494
SIX2	2.01412
CELA3A	2.01326
HOXC6	2.01253
SOX21	2.01184
TMEM106A	2.00581
GCOM1	2.00541
ENO2	2.00252
KLK13	2.00127
C6orf141	1.9956
SEMA4A	1.99453
MX2	1.99407
FLJ23867	1.99377
SCIN	1.99131
HHLA2	1.98618
RASAL1	1.98568
TMC5	1.98378
ABCA12	1.97936
FPR2	1.97856
PLBD1	1.97783
SP6	1.97734
GSTP1	1.97251
IL2RG	1.9685
CDCA7	1.96745
SLC16A4	1.9629
PRR5-ARHGAP8	1.95874
CELSR1	1.95777
PTCHD3	1.95479
HOXC13	1.95195
ZNF486	1.94793
SERPINB2	1.94642
KCNH2	1.94562
GRHL2	1.94096
C6orf105	1.93728
WNT7A	1.93482
TNNT1	1.93364
ITGB3	1.93255
IGF2BP3	1.93013
MAGED4B	1.92928
SLC16A9	1.92892
LOC100131551	1.92723
PPP2R2C	1.91915
DSG3	1.91862
SAMD12	1.91824
TOX3	1.91786
ONECUT3	1.91674
EFCAB4B	1.91512
HSN2	1.91419
COL8A1	1.90807
DPEP1	1.90755
SPDEF	1.90432
TRIB2	1.90393
SNORD116-4	1.90355
MYBPC1	1.89968
HOXA13	1.89801
NCOA2	1.89595
ZNF702P	1.89426
CYP26A1	1.89388
SFN	1.8886
CCL18	1.88612
LRRN1	1.88523
EPHX3	1.88476
PTX3	1.88378
LOC84740	1.88214
SERPINE2	1.8748
FZD7	1.87311
GPR158	1.87209
TFPI2	1.87136
KIAA0754	1.87058
SLC35F2	1.87036
ABO	1.86955
FCAR	1.86884
NMNAT2	1.86693
GALNT12	1.86651
PDE3A	1.86635
ERP27	1.85726
BDNF	1.8568
EIF3C	1.85523
HS3ST2	1.8518
STC1	1.84856
LOC220594	1.84836
PRRX1	1.84752
GRHL3	1.84683
OSR2	1.84529
LGALS7B	1.84312
C20orf54	1.84034
GALNT6	1.83398
HOXD8	1.83136
ASPH	1.83091
HOXA3	1.83076
REG1B	1.82811
TMEM171	1.82626
SLC16A3	1.82575
PRDM8	1.82521
KIRREL	1.8251
LOC93432	1.82443
PCDH10	1.82217
PRKG1	1.82189
REL	1.81923
CHRNA1	1.81656
FOXC1	1.81599
TNFSF15	1.81513
KRT4	1.81484
SPIN4	1.81184
SLC16A5	1.81108
PAQR8	1.80593
LGALS7	1.80488
ODAM	1.80396
LIMS1	1.80373
FOXD1	1.80368
SDR16C5	1.8016
COLEC12	1.80114
GNGT1	1.80062
LOC554202	1.80014
ARID5B	1.79909
ALDH3A1	1.79579
MFAP2	1.79534
PCP4	1.79402
CXCL1	1.79342
HRNR	1.79306
ZIK1	1.78757
SNCAIP	1.78717
KCNS1	1.78621
REG3G	1.78472
MAML2	1.78448
LHX1	1.78335
SMAD9	1.78296
PAX7	1.78151
SULT1E1	1.7802
CLIP4	1.77915
NRCAM	1.77801
KCNN4	1.77767
PDX1	1.77662
NHS	1.77411
SLC28A3	1.77403
MXRA5	1.77402
GTF2A1	1.77393
IGFL2	1.77327
SGPP2	1.77282
IL8	1.77081
CDRT1	1.77079
ACTA1	1.77065
PDGFRL	1.76829
TBX4	1.76829
IGFBP3	1.76728
LOC149837	1.76635
HOXC4	1.76422
TSPAN13	1.76346
EYA4	1.76067
DLX5	1.7599
RIPK3	1.7595
SPHK1	1.75675
CHL1	1.75642
C6orf176	1.75605
GAS7	1.75529
PLA2G10	1.75143
CST6	1.75111
ZNF860	1.74967
FBN3	1.74935
B3GNT8	1.74589
PLA2R1	1.74504
HIPK3	1.74143
NIPAL1	1.73886
LOC654433	1.73783
GAL	1.73625
GAP43	1.73537
LOC723809	1.73531
INS-IGF2	1.73492
SLC30A8	1.73484
SERPINB3	1.73271
QPCT	1.73236
PTAFR	1.7272
TPRXL	1.72414
LRP4	1.72324
TAC1	1.72297
KIAA1210	1.72214
ETV4	1.72162
L1CAM	1.71713
DLX3	1.71683
VLDLR	1.71103
XG	1.71061
WNT10A	1.71022
ARHGEF19	1.70806
TRPV3	1.70681
RNF217	1.70678
SLC2A14	1.70675
CELA3B	1.70034
IGSF5	1.70032
DACH1	1.69704
B3GNT6	1.69701
LHFPL3	1.69494
LAMC2	1.69466
ACTG2	1.69314
CXCL14	1.69143
CNTN1	1.69131
IGSF9	1.69125
PBX1	1.69094
LINGO1	1.69077
DDR2	1.68964
HPSE	1.68877
KLK11	1.68827
C11orf86	1.68519
COL28A1	1.68491
COL10A1	1.68367
C20orf103	1.68278
TACSTD2	1.68233
XIRP1	1.6823
CREG2	1.68207
EVPLL	1.68163
SPINK4	1.68027
CA3	1.67994
KLK7	1.67989
KREMEN1	1.67595
AQP12B	1.67305
PCDHGB2	1.67122
FN1	1.67006
FAM101A	1.66851
ZNF827	1.6685
PI15	1.66656
BIRC7	1.66637
EGLN3	1.66572
WWTR1	1.66558
PLAU	1.66356
ZNF192	1.66113
LRRC15	1.6604
PLA2G4A	1.65849
TNF	1.65848
PTK7	1.65574
ZNF321	1.65304
GPR173	1.65109
SAMD13	1.64794
HIF3A	1.64657
SIX4	1.64612
HEY1	1.64453
MMP3	1.64407
SCG2	1.64312
MTUS2	1.64175
MUC1	1.64089
DDIT4L	1.64073
CLDN18	1.63937
GALNT4	1.63861
ADORA2B	1.6351
SIX1	1.63461
C1orf175	1.63386
SLC2A10	1.63331
GPR1	1.63288
STK32A	1.63139
ZNF703	1.63093
MLPH	1.62996
KRT13	1.62776
PRRX2	1.62702
PCDHGB1	1.62558
C20orf195	1.62551
SLC4A7	1.62498
ACTBL2	1.62312
ZNF229	1.62295
GTSF1	1.62141
GPR81	1.61995
GPR161	1.61846
CDK5R2	1.61844
MICALCL	1.61683
FAM3B	1.61565
APOD	1.61508
THSD7B	1.61485
RGMA	1.61468
HOXC5	1.61329
C12orf56	1.61286
TTC22	1.61235
MYO9A	1.61226
HAPLN1	1.61064
RGPD5	1.60939
SLC1A1	1.60914
SOSTDC1	1.60661
RASA2	1.60593
DRP2	1.60588
LOX	1.60549
C19orf21	1.60516
BCL2L15	1.605
RIMKLB	1.60388
ROR1	1.60375
AK3L1	1.60213
KCNQ4	1.60096
RIN2	1.60015
RXFP1	1.59945
TAOK1	1.5994
ASAM	1.59912
HRH1	1.59852
TFAP2C	1.59838
CA12	1.59736
ZIC5	1.59703
SPOCK1	1.59348
LPPR4	1.59338
COL4A6	1.59326
ZNF135	1.59164
FCGR3B	1.59035
UCN2	1.59017
ABCA4	1.58922
VCAM1	1.58635
BICD1	1.58607
LMTK2	1.58514
ACER2	1.58443
HOXA1	1.58296
FBXW10	1.58284
SLC11A1	1.58191
C15orf48	1.58136
STYK1	1.58071
PPM1L	1.58018
COL12A1	1.5796
PRSS22	1.57906
RAET1L	1.57779
PKIA	1.57753
FIBCD1	1.57639
HMGA2	1.57613
SEMA3D	1.57596
NPAS2	1.57507
C6orf222	1.57485
C20orf151	1.57413
TWIST1	1.57342
CD9	1.57224
UGT3A2	1.5706
WNT6	1.56963
CDH19	1.56937
HES2	1.56911
NBL1	1.56828
SLN	1.56689
MSX2	1.56601
KRTAP4-1	1.56578
OXGR1	1.56375
AFAP1L2	1.56151
GSTT1	1.56001
TM4SF19	1.55944
KLF7	1.55873
LY6G6C	1.55855
CDCP1	1.55502
PLCB4	1.55493
CRABP2	1.55434
C5orf46	1.55252
SYT8	1.55084
ANXA3	1.54884
TNNC1	1.54845
MFSD6L	1.54766
GDPD2	1.54735
C13orf33	1.54724
PYGL	1.54719
PCDHGA4	1.54681
ACE	1.54625
RNF24	1.54549
PMAIP1	1.54426
GABRA3	1.54381
FOS	1.54377
NKD1	1.54353
GCNT1	1.54316
SLCO4A1	1.54157
FZD10	1.5405
EPHB1	1.54031
VWA5A	1.53973
SOCS7	1.53843
NELL2	1.53784
LRRK2	1.53684
ZNF185	1.53651
CELF4	1.53605
SFTPA2	1.53582
TRPS1	1.53254
LPAR1	1.53198
CHST6	1.52955
LCOR	1.52933
MOGAT3	1.52902
PLAGL1	1.52819
THBS1	1.52777
TMTC2	1.52611
KIAA1244	1.52508
ARNTL2	1.52187
TMPRSS5	1.52174
UCA1	1.52047
RTKN2	1.51845
GDPD1	1.51838
ARHGAP11B	1.51759
LGR6	1.51568
MTNR1A	1.51316
MMP7	1.51311
RELN	1.51187
MEG3	1.50956
NRK	1.50923
RAB3B	1.50904
PLA2G4D	1.50733
LYPD3	1.50726
LRP2	1.50625
TNFAIP6	1.50377
EDN3	1.50195
KIAA1024	1.49713
VDR	1.49453
NQO1	1.49317
FAM106A	1.49279
TP63	1.49207
RP1L1	1.49126
C10orf118	1.49114
LPAR5	1.48953
SLC7A11	1.48837
MYBPHL	1.48807
ANKRD33	1.48788
PDLIM4	1.48683
ZIC1	1.48569
ZSCAN4	1.4847
ETV3	1.48469
PCDH1	1.48445
LOC653653	1.48414
TRIM54	1.48332
CACNA2D1	1.4825
S100A9	1.48173
FAM23A	1.48145
VAV3	1.48078
EPHA4	1.48013
ATP6V0A4	1.47976
FMN1	1.47946
ABHD12B	1.47904
KRT34	1.47847
SLC30A2	1.47718
CDH11	1.47506
N4BP2	1.47445
GRP	1.47231
CHP2	1.47214
CALB2	1.47086
BCAT1	1.47028
TSPAN5	1.46929
POU6F2	1.46888
EYA1	1.46868
CR1	1.46799
ZNF528	1.46752
COL9A2	1.46616
CACNG6	1.46579
HRASLS2	1.46398
HOXA6	1.46342
STOX2	1.46237
LAMA3	1.46175
CA8	1.46069
CLDN8	1.46049
GPX2	1.46013
BEAN	1.45922
MEX3A	1.45833
GJB3	1.45832
ARHGAP32	1.4582
PTHLH	1.45741
CSMD1	1.45734
FAM160A1	1.45672
LRP1B	1.4554
GAS2L3	1.45468
PLEK2	1.45371
LCN2	1.45325
IL6ST	1.45322
ADAM8	1.45274
SLC22A11	1.45258
SHPRH	1.45242
TFCP2L1	1.44953
CORIN	1.44907
UCN3	1.44905
SERPINB4	1.44883
TBX3	1.44816
NAP1L6	1.44754
CIB2	1.4475
FAM135B	1.44618
GLP2R	1.44551
CCNT1	1.44548
FAM13C	1.44537
SERINC5	1.44418
HOXA5	1.4416
OLR1	1.44159
UHMK1	1.44054
S100A4	1.43932
PGM2L1	1.4392
PCSK1N	1.4367
ZNF649	1.43663
RUNX2	1.43514
STK32B	1.43451
FLJ22536	1.43296
NRIP3	1.43289
ZNF418	1.43167
LOC90246	1.43116
CD55	1.43113
RGS2	1.42935
H19	1.42853
GPAT2	1.42817
GALNT3	1.42747
ITGB4	1.42617
POU4F1	1.42565
ROCK2	1.42535
GPR17	1.42512
COL7A1	1.42331
DPY19L3	1.42293
RFX6	1.42284
LUZP2	1.42187
SH3PXD2B	1.4205
TRIM2	1.42014
WFDC3	1.41885
RUNX1	1.4187
QSOX1	1.4183
NCF2	1.41753
SULF1	1.41493
ITPRIPL1	1.4143
BARD1	1.41162
AFAP1	1.41067
CCDC144A	1.41013
WISP1	1.40987
UPK3A	1.40825
RAPGEF6	1.40748
GAD2	1.40674
DAAM1	1.40644
MPZL3	1.40639
PAR5	1.40617
ZNF347	1.40392
NTF4	1.40387
NIPAL2	1.40342
MYOF	1.40279
SLC7A8	1.40197
COL5A2	1.40175
TMEM213	1.40174
KLK5	1.40143
SEMA7A	1.40028
CHRDL1	1.39845
ZNF816A	1.397
DGKG	1.39595
C1orf116	1.39568
SLC2A3	1.39567
B3GALT5	1.39403
CCL13	1.39338
KRT20	1.39277
CGB5	1.39187
FMO2	1.39112
LOC284837	1.39056
STRN	1.39032
COL6A3	1.38922
ANKRD34B	1.38905
MBOAT4	1.38879
MYH14	1.38746
NR4A1	1.38676
BTBD19	1.38647
PRSS3	1.38536
PLCH1	1.38378
CACNG4	1.38236
CNKSR1	1.3819
LPO	1.38156
CREB3L1	1.38069
UST	1.37998
SGK196	1.37997
DNAH3	1.37585
MARCO	1.37505
ALPP	1.37486
MSLNL	1.37401
TXLNG	1.37388
MTHFD2	1.37378
AMOT	1.37332
SLC16A6	1.37321
CALHM3	1.373
DDX60L	1.37283
PDCD1	1.37189
HRASLS5	1.37183
CD300E	1.37107
CTHRC1	1.37026
CITED1	1.36942
KLF8	1.36932
ACPP	1.36913
RAG1	1.36873
DPYSL3	1.36861
PANX2	1.36856
ZNF460	1.36853
OSMR	1.36808
EDN1	1.36797
FUT9	1.36643
CCL24	1.36604
psiTPTE22	1.36524
ANKFN1	1.36517
ADAM17	1.3651
IGDCC4	1.36495
AXIN2	1.36147
HOXA11	1.36028
DDI2	1.35906
AKR1B15	1.35904
FLJ45445	1.35846
VSNL1	1.35711
ANKRD1	1.35679
IRX3	1.35587
SST	1.3539
APOBEC1	1.35333
EPSTI1	1.35277
FNDC1	1.34984
FAM63B	1.34883
MAGED4	1.34782
TSKU	1.34747
ASXL2	1.34744
EGR3	1.34687
HOXA11AS	1.34648
FFAR2	1.34553
GJB5	1.34475
GPR37	1.34421
FRAS1	1.34419
BANK1	1.34356
FLG	1.34348
GUCY2C	1.34265
C6orf227	1.3426
B4GALNT2	1.34168
LCP1	1.341
FREM2	1.3403
BEX5	1.33983
BARX2	1.3376
LGI1	1.33693
DNAJB13	1.33655
DLEU7	1.33647
TSPYL5	1.33588
ARHGEF38	1.33532
SCN9A	1.33505
CASC5	1.33455
TREML2	1.33399
CACHD1	1.333
PDZRN3	1.33193
LRRN4	1.33181
COL22A1	1.33116
PFN2	1.33067
TPD52L1	1.32914
LPAR3	1.32856
IGDCC3	1.32842
CHRM1	1.32824
MID1	1.32713
PDZD2	1.32702
C6orf150	1.32569
TH	1.3246
ETV5	1.32365
CKAP2L	1.32216
RAB9B	1.32152
FAM84A	1.3205
MMP11	1.31812
LRRK1	1.31746
ANKRD36BP1	1.31673
MAN1A1	1.31649
KITLG	1.31555
STXBP5	1.31549
PAK6	1.31453
ASAP2	1.31414
CP	1.31147
RIF1	1.31092
LILRA6	1.31019
LOC284441	1.30843
LOC150197	1.30807
TDRD1	1.30776
KBTBD12	1.30767
REST	1.30457
ACCN4	1.30361
SLC13A1	1.30284
COL24A1	1.30283
MYO3A	1.30214
CST1	1.30211
GRAMD2	1.29953
MRAP2	1.29933
KIAA1383	1.2986
PKP2	1.2979
FABP5	1.29742
KIAA1462	1.29701
MYB	1.29666
HOXC8	1.29604
PDPN	1.29571
TINAG	1.29562
LRP12	1.29506
KCNC2	1.29473
TBC1D4	1.29344
MSI1	1.29322
PTPRT	1.29268
FOXP2	1.29253
TGFBR3	1.29056
TRPM5	1.29019
ZNF697	1.28969
FOXQ1	1.2895
44623	1.28727
RNF183	1.28606
SPACA4	1.2854
STK38L	1.28524
PXDN	1.28384
IER3	1.28283
RRN3P1	1.28045
CHRFAM7A	1.28027
CTGF	1.28024
UGT1A7	1.27987
NTN1	1.27828
CRIP1	1.27827
GDPD5	1.27786
GSDMA	1.27774
CMTM6	1.27769
SLC35F1	1.2774
ISX	1.27723
C4orf7	1.27632
SNCA	1.27527
FAM168A	1.2751
SLC2A5	1.27491
LATS1	1.27476
KLC3	1.27286
KCND2	1.27285
ACAN	1.27111
KIAA0319	1.27085
HK1	1.27084
IPMK	1.27054
TPSAB1	1.27048
ATE1	1.2702
NYNRIN	1.26896
RFX3	1.26872
GUCY1A2	1.26837
SLITRK6	1.26788
VSTM2L	1.26784
C10orf55	1.26707
TTLL7	1.26665
GSDMC	1.2664
CLDN6	1.26627
TMPPE	1.26574
CILP2	1.2654
XIST	1.26522
PCDH18	1.26493
DTX4	1.26484
FCHO1	1.26471
MAGEA6	1.26435
NTRK2	1.26431
ITLN1	1.26384
A2ML1	1.26381
EPHX4	1.26378
ZNF469	1.2637
WNT5A	1.26367
ACE2	1.26361
DLGAP5	1.2628
ZNF549	1.26237
KIF26B	1.26137
ADPRHL1	1.26111
SH3D20	1.2609
FLJ16779	1.26006
LAMA1	1.25962
PLAUR	1.25909
MUC17	1.2585
RASSF6	1.25826
NFATC2	1.25795
TMEM84	1.25792
C9orf50	1.25729
C11orf90	1.25727
MMP8	1.25614
KLHL23	1.25586
SFRP1	1.25554
ZC3HAV1L	1.25491
CELP	1.2549
RBL1	1.25482
TGFBRAP1	1.25406
ENC1	1.25368
TRERF1	1.25356
RASSF3	1.25355
ZNF704	1.25304
LEPREL2	1.25182
CELF3	1.25177
S100A8	1.25114
MMP16	1.25061
STT3B	1.24927
CYP19A1	1.24884
HSP90AB2P	1.24868
FOSL1	1.24838
IL17RD	1.24739
ANLN	1.24656
EPHA7	1.24619
CARD6	1.24576
DLK1	1.24567
TGM2	1.24512
PCDH17	1.24433
PPFIA4	1.24417
RASEF	1.24349
HOXA7	1.24314
TNFSF18	1.24259
SYT1	1.24194
CMTM7	1.24178
KLHL11	1.2414
ZNF665	1.24055
SPAG17	1.24024
CCL7	1.23983
HEPACAM2	1.23964
GNG4	1.23935
SLIT2	1.23903
OSBPL10	1.23843
BRCA2	1.23678
SOCS3	1.23643
PITX2	1.2363
F2RL2	1.23617
ZNF761	1.23484
CPA2	1.23372
PLAT	1.23368
ZNF462	1.23356
NEU3	1.23292
JPH2	1.23274
SSPN	1.23249
GCNT3	1.23207
GXYLT2	1.23161
FLNC	1.23052
BCL2A1	1.23048
FAM114A1	1.22968
CGB	1.22919
CCNI2	1.22865
ZNF880	1.22798
CSF2	1.22768
ZNF585B	1.2273
FMNL2	1.22627
CD36	1.22574
CHST3	1.22502
MUC12	1.22464
RHOV	1.22439
FXYD4	1.22425
A4GALT	1.22405
TEX11	1.2238
SLCO1B3	1.2236
ALDH3B1	1.22325
C13orf29	1.22288
NEK5	1.22255
GPR87	1.22253
ZNF611	1.22233
SLC39A10	1.22183
FUT8	1.22144
EYA2	1.22123
DCC	1.22009
FSTL5	1.21999
KLK4	1.21967
CHRM3	1.21951
44815	1.21935
GRM4	1.2187
LDLRAD3	1.21851
ATOH1	1.21847
GRIN2D	1.21836
GTF2IRD1	1.21821
LOC100272216	1.21803
ZNF614	1.21755
PCDHGA9	1.21711
CLCN1	1.217
LYZ	1.21688
LFNG	1.21608
PHEX	1.2158
CLOCK	1.21546
HOXD1	1.21503
TCF7	1.21494
CABP4	1.21484
KIAA1324L	1.21438
GPA33	1.21327
C9orf102	1.21324
FAT1	1.21319
CHRNA5	1.21213
SFTA2	1.21148
TAS2R38	1.21087
PHGR1	1.21016
KRTCAP3	1.20938
UNC5C	1.20833
KLK12	1.20522
SMPX	1.20522
ASPM	1.20512
NKX2-2	1.20502
ADAM10	1.2048
SIGLEC15	1.20416
SLC38A5	1.20396
CHIT1	1.20349
MATN2	1.20282
NBEA	1.20258
CDC42EP3	1.20249
LIMS3	1.20219
UBASH3B	1.20185
SULF2	1.20185
STC2	1.20114
CXCR2	1.20113
TRIM63	1.20092
SHF	1.20052
RAB42	1.20029
EGR1	1.20005
NTM	1.19976
LOC339535	1.19962
C1orf106	1.19916
EGFL6	1.19839
TNFRSF6B	1.19805
CDSN	1.19792
FAM178B	1.19733
LNPEP	1.19733
NFE2L3	1.19666
CCL3L1	1.19651
NEIL3	1.19638
NKAIN4	1.19599
ST8SIA2	1.1957
POTEF	1.1956
ASAP1	1.1955
SLC7A4	1.19411
MFHAS1	1.19407
DOCK11	1.1937
RAI14	1.19364
ANXA2P2	1.19355
CTRC	1.19218
GBX2	1.19082
PTPLB	1.19075
PPP4R2	1.18835
KIAA1644	1.18835
ZNF826	1.18668
PTPRE	1.18652
ANKRD20B	1.1865
CALML5	1.18613
E2F8	1.18438
ZFP92	1.18407
CPE	1.18388
AKAP2	1.18179
LIMK2	1.18104
CD163L1	1.18061
AQP2	1.18059
XYLT1	1.17972
B3GALT1	1.17943
NBPF16	1.17931
WDR17	1.1792
PLEKHA4	1.17896
GPR19	1.17779
LOC650623	1.17778
AKR1B10	1.17759
ZNF365	1.17735
GALNT10	1.1752
TOP2A	1.1746
PRKAR2A	1.17427
ISL1	1.17386
PTCH2	1.17338
IL17REL	1.17336
LRRIQ3	1.17331
WWC3	1.17307
HAS2	1.17291
HDGFRP3	1.17218
GRM1	1.17218
HECW1	1.17173
ZFP82	1.17165
ITGA8	1.17055
FLJ43390	1.17054
CRISPLD1	1.16972
SYT16	1.16908
SHISA2	1.16839
PCDH20	1.16823
SLC8A2	1.1682
TRIM16	1.16753
GPRIN3	1.16699
MAGEA3	1.16682
NWD1	1.16679
ERO1L	1.16646
FNIP2	1.16573
C7orf51	1.16572
KLHL4	1.16561
GPR85	1.16485
GLIS1	1.16411
NOTUM	1.16389
PELI2	1.16381
C13orf18	1.16362
KIF18A	1.1636
DSC2	1.1627
SORCS2	1.1626
CEACAM1	1.16243
CYP2S1	1.16215
TG	1.1621
SOX8	1.16194
KIAA1324	1.1618
LOC100133161	1.16088
ESRRG	1.15926
STEAP2	1.15896
EIF2C2	1.15886
SMPDL3B	1.15794
PCYT1B	1.15792
IGJ	1.15764
NES	1.15739
LONRF3	1.15729
NEFL	1.15606
SRMS	1.15562
ARHGAP42	1.15463
CTRB1	1.1546
ERN1	1.15439
DRD2	1.15435
ARRB1	1.1542
SLC5A8	1.15329
NMUR2	1.15289
OR2A4	1.15198
COL25A1	1.1517
ADAM22	1.1515
CCDC110	1.15044
FAM132A	1.15028
NAV2	1.15024
MAP7D2	1.149
FAIM2	1.14863
BAIAP3	1.14717
STEAP4	1.14692
RUNDC3A	1.1466
TTYH3	1.14644
TMEM35	1.1463
DDX43	1.14608
DKK4	1.1459
EPR1	1.14561
PDE4C	1.14507
SLC7A1	1.14485
CATSPER1	1.14445
DOC2B	1.14353
CYR61	1.14338
WBP2NL	1.14322
ZNF281	1.14316
VANGL2	1.1423
DCHS2	1.14211
RAB27B	1.14189
MDFI	1.14181
CES1	1.14113
RBP1	1.14089
TNFRSF11A	1.14019
B3GNT4	1.13938
TMEM130	1.13868
BRWD3	1.1386
NOTCH3	1.13788
COL8A2	1.1373
GPC4	1.13696
TC2N	1.13685
CASR	1.13643
ITPR3	1.13552
DAPP1	1.1346
ZBTB10	1.13424
CUBN	1.13415
LPP	1.13411
FAM72A	1.13357
NR0B1	1.13326
BIK	1.13301
CAPG	1.13228
CSRNP3	1.13207
MYO18B	1.13054
PLXNA3	1.12932
IRAK2	1.12548
SESN3	1.12535
FABP6	1.12496
EHF	1.12481
RAB31	1.12452
FAM157A	1.12437
FAM72D	1.12426
C20orf177	1.12379
UBXN7	1.12344
EBF3	1.12199
OAT	1.12166
CD109	1.12161
LEPREL1	1.1212
SORT1	1.12041
KISS1R	1.12037
BTG2	1.11922
CENPF	1.11915
NPNT	1.11904
ZNF284	1.11871
ZDHHC2	1.11847
GPR111	1.11782
INS	1.11707
PTK6	1.11603
PFKFB4	1.11584
JAKMIP3	1.11515
NETO1	1.11488
PELI1	1.11395
PP14571	1.1132
FHDC1	1.11293
SBK1	1.11229
KRT75	1.11103
C2orf70	1.11044
FAM83D	1.10909
FAM150A	1.10862
MMEL1	1.10831
CDK6	1.10815
TMC6	1.1079
IL7R	1.10717
DGKI	1.10683
FBN2	1.10645
ANTXR1	1.10645
RXFP4	1.10627
HOXB7	1.10618
COL1A2	1.10612
IL22RA1	1.10536
LEFTY2	1.10516
FAM164A	1.10468
FOSL2	1.10451
FUT11	1.10417
NOD2	1.10398
ROS1	1.10352
TSPYL3	1.10351
FHL5	1.10302
NBEAL1	1.10282
SVOPL	1.10273
KIF14	1.10177
IFI44L	1.10174
ZNF134	1.10167
DAAM2	1.1015
EMB	1.10104
USP12	1.10084
WDFY2	1.10033
NBPF14	1.10023
C10orf10	1.10017
SIGLEC5	1.1001
CERCAM	1.0996
KCNMB4	1.09942
EGR4	1.09906
C17orf76	1.09858
FEZF1	1.09843
GJA3	1.09843
CALCR	1.09789
TMSB15A	1.09773
PKP3	1.09735
PMFBP1	1.09697
SERPINE1	1.09677
CNIH3	1.09668
PTPRG	1.09639
KIF3C	1.09623
REC8	1.09559
ME1	1.09481
G6PD	1.09362
KDELR3	1.09348
MAP3K8	1.09341
GNB3	1.09333
SBNO1	1.09314
CLDN10	1.09309
KRT6C	1.0921
GPR110	1.09186
PLAG1	1.09157
LUM	1.09116
ZNF577	1.09105
SLFN11	1.09027
SYTL2	1.09004
LOXL2	1.09003
BCAS1	1.08929
SPATA13	1.08914
SERPINB7	1.08763
MARVELD1	1.08654
CLCN3	1.08608
RNF169	1.08595
LAYN	1.0859
FAM19A5	1.08566
C1orf84	1.08536
CDC42EP5	1.08536
GLI3	1.08532
SUSD1	1.08481
BHLHE41	1.08395
CSDA	1.0837
CENPE	1.08232
SSX1	1.08202
EBF2	1.08164
PSG5	1.08124
AKR1E2	1.081
CTSL2	1.08049
IRX1	1.08033
TAF1L	1.0801
SOX9	1.08006
NR2F1	1.07843
ZNF426	1.07819
PLEKHG6	1.07812
GDNF	1.07741
ARHGAP8	1.077
GDF5	1.07646
SGOL1	1.07568
ZNF430	1.07562
CFC1B	1.07541
LIF	1.07528
UGCG	1.07503
XPNPEP2	1.07473
SLIT3	1.07422
NAV1	1.07342
COL15A1	1.07329
EFNA5	1.07285
IQGAP1	1.07259
OSBPL6	1.07182
CRABP1	1.07182
UEVLD	1.07167
LIMA1	1.07158
LOC286467	1.07139
AIF1L	1.07115
CHRNA6	1.07078
FSCN1	1.06867
NEK2	1.06858
GABRQ	1.06856
SPON1	1.06843
LASS6	1.0682
C9orf140	1.06816
ZNF28	1.0679
AVL9	1.06717
C10orf82	1.06716
MAGEA2	1.067
KCNJ2	1.0669
LAMC1	1.06661
KLHL35	1.06649
LYPD2	1.06546
TLR6	1.0629
KLHL3	1.06283
EXOC6B	1.06269
BCL11B	1.06203
FAM127C	1.06192
CALY	1.06127
IGFBP2	1.06103
PDE4B	1.05997
FKBP1B	1.05984
CSAG3	1.05983
KPNA7	1.05962
CYP2W1	1.05807
CLSPN	1.05767
NXF3	1.0571
CEACAM8	1.05683
CA13	1.05603
HCG11	1.05601
LGR5	1.05518
GPR176	1.05475
FOXI1	1.05451
SLC2A13	1.05423
ICAM5	1.05391
RCOR2	1.05381
TRIM17	1.05305
LRFN4	1.05294
LEFTY1	1.05281
C10orf67	1.05265
RBM20	1.05253
MMD	1.05244
CRYBA2	1.05244
ZNF354C	1.05185
ALDH1L2	1.0515
ADAMTSL3	1.05143
PRUNE2	1.04947
IFNE	1.04936
ANXA1	1.04713
PLAGL2	1.04682
S100A14	1.04551
S100A2	1.0448
CBX2	1.04462
RPS15AP10	1.04455
SLC5A3	1.04342
CNNM4	1.04324
P4HA1	1.04312
MAP3K13	1.04263
ZNRF3	1.04228
C1orf58	1.04222
CPA3	1.0414
VAX1	1.04138
LOC100133991	1.04124
MET	1.04101
TM7SF4	1.04072
CRHR1	1.04063
HMGB2	1.04034
SLC5A12	1.03982
DNAH2	1.0396
TNFRSF21	1.0381
PHLDA1	1.03663
MAN1A2	1.0364
BPI	1.03569
SNURF	1.03532
RAET1G	1.03499
TMEM87B	1.03483
ALPPL2	1.0346
FGF3	1.03459
HOPX	1.03389
LOC441869	1.03386
IGF2	1.03373
ARID3A	1.03368
BCL11A	1.03314
SLC9A7	1.03309
HIST1H2BH	1.03277
C4orf47	1.0323
TCAM1P	1.032
LOC645431	1.03179
BEND6	1.03135
EFHC2	1.03098
COL3A1	1.03053
SULT1C2	1.03045
AMIGO2	1.03034
DPP8	1.02975
GABRB2	1.02936
IGSF22	1.02917
CCR3	1.02916
SAMD8	1.02898
S100A16	1.02869
ANXA2P1	1.02721
NUF2	1.02716
DLEC1	1.02688
FBXO32	1.02674
COL13A1	1.02673
PYGO1	1.02627
ESR2	1.02573
OXR1	1.02543
FSTL4	1.02518
FAM122C	1.02453
ZNF845	1.02414
PYCR1	1.02372
ERCC6L	1.02363
CDKL2	1.02359
KIAA1549	1.02332
CCR9	1.02274
PLEKHG1	1.02224
PRR5L	1.02183
GSC	1.02167
SKAP2	1.02165
SPOCK3	1.02146
ZNF623	1.02099
LOC100188947	1.02089
SLFN5	1.02076
MRC2	1.02067
NBPF3	1.02055
NETO2	1.02045
RAPGEFL1	1.01976
PODNL1	1.01961
SPRY4	1.01941
SYNE2	1.01938
RPS6KA6	1.01938
SPRR1B	1.01927
STEAP1	1.01895
GNPNAT1	1.01834
CD2AP	1.01805
TTBK2	1.01745
NEUROD1	1.01663
TFAP2E	1.01641
BHLHE40	1.01624
NR1I2	1.01541
HERC3	1.01533
ZNF256	1.01524
FGF23	1.01521
NR2C2	1.01488
KRT81	1.01464
ULBP2	1.01432
TSPAN2	1.01396
LOC201651	1.01354
STXBP6	1.01321
KIT	1.01304
LOC374443	1.01302
IL1F5	1.01272
44626	1.01266
FRMD6	1.01265
FAM169A	1.01256
GREM2	1.01226
AHNAK	1.01217
DENND2C	1.01207
CENPI	1.01186
RGS16	1.01162
WDHD1	1.01153
ANGPT2	1.01153
PPEF1	1.01143
PLEC	1.01128
SGCE	1.01105
UNC93A	1.011
FAM198B	1.00973
ADRBK2	1.00937
SATB1	1.00932
KHDRBS3	1.00921
NR4A2	1.00881
OSM	1.00838
FAM131B	1.00819
C6orf186	1.00799
KRT19	1.00788
PLOD2	1.00761
ST3GAL1	1.00742
CHST15	1.00739
HOXC12	1.00681
FOXI3	1.00663
NCRNA00120	1.00621
COL1A1	1.00588
NEK10	1.00559
PCDHGA1	1.00557
CEACAM7	1.00541
TMEM26	1.00523
ZNF468	1.0049
ZNF525	1.00435
TSIX	1.00374
COL5A1	1.00363
TTN	1.00277
LGALS3	1.00225
PHLDA2	1.00179
P4HA3	1.00167
F3	0.999822
NTSR1	0.999788
ATL1	0.999393
RALGAPA2	0.999326
SULT2B1	0.99921
NXN	0.999116
LOC100302640	0.997834
ROBO3	0.99783
E2F7	0.997771
GPR152	0.997287
DDX60	0.99692
ZKSCAN1	0.996908
CALU	0.99689
TM4SF1	0.995646
CNN2	0.995525
FAM102B	0.995379
GABBR2	0.99524
CDON	0.995077
DUSP4	0.99473
TAF1A	0.994015
ALOX15B	0.99376
SKIL	0.993493
CCRL1	0.993279
SAV1	0.992719
DYDC2	0.992355
C7orf52	0.992162
FAP	0.992135
RHOJ	0.991923
ZNF81	0.991686
SSTR3	0.991266
TXLNB	0.990809
F13A1	0.990359
TMEM63A	0.989564
KCNC3	0.989164
COL2A1	0.988978
HOXD3	0.988517
SYT17	0.988469
MAN2A1	0.988401
RAB30	0.988296
CEP55	0.988214
CHD5	0.987905
SEMA3B	0.987798
CD44	0.987511
GPCPD1	0.987484
CXCR1	0.98717
ITGA6	0.987011
GATA2	0.98669
FBXO34	0.986447
TMEM132C	0.986352
TNNC2	0.986154
JHDM1D	0.985649
RASSF9	0.985625
ARFGEF1	0.985514
LOH3CR2A	0.985219
KRT3	0.98517
NCOA7	0.984738
TBX5	0.984462
PLN	0.98363
SFT2D1	0.98339
FAM171B	0.983194
STX1A	0.98241
CNKSR2	0.982207
GABRA2	0.981934
MS4A15	0.98056
FER1L5	0.980449
LOC100134868	0.979638
LOC100133469	0.979562
ARHGEF2	0.979371
DAPL1	0.979275
PNLIPRP1	0.97895
BTN2A3	0.978729
MKI67	0.978309
TNFAIP3	0.976316
EDNRA	0.975965
HTR2C	0.975294
DPP4	0.975013
PNMT	0.974649
SGK223	0.97394
FCN1	0.973778
GPR179	0.9733
ISM1	0.973179
NHSL2	0.97292
LOC100190986	0.972813
CACNB1	0.972559
PNLIP	0.972452
CDYL2	0.972123
INPP4B	0.972094
GCG	0.971576
KLHL2	0.970667
PCDHA4	0.97049
TSPAN11	0.969941
PROM1	0.969819
DDX21	0.969685
LOC647121	0.969393
DHX33	0.969016
SMURF2	0.96889
ZNF710	0.968871
KAZALD1	0.968742
IL28RA	0.968542
SYNGR4	0.968507
ARHGAP18	0.968463
VANGL1	0.968457
MAP3K2	0.96845
GPR56	0.968169
FGF5	0.967621
PTCRA	0.96692
GLI2	0.966413
BTNL3	0.966368
ARTN	0.965855
LRRCC1	0.964663
TRIM56	0.963254
ANXA2	0.962487
FIGNL2	0.962078
RASAL2	0.962024
TRIP13	0.961808
THBS2	0.961468
ZNF765	0.961455
MTMR8	0.961167
SYNJ2	0.96092
ZNF774	0.96081
CLLU1	0.960783
PARD3B	0.960727
H2BFXP	0.960258
PIR	0.959877
SLC6A6	0.9598
KIF7	0.959333
TPD52	0.95886
LRIG2	0.957908
ZSCAN12	0.957747
TFRC	0.95615
CSDAP1	0.955685
TRAM2	0.955303
ELK3	0.955074
LY6K	0.95493
STK31	0.954628
PABPC3	0.954444
ADAM6	0.954113
LOC284100	0.954053
PNMA2	0.95378
ZNF280C	0.953369
TRAF5	0.953336
RBM44	0.952935
GOLIM4	0.952744
UBE2C	0.952415
RNFT1	0.952321
C1orf150	0.952188
SYNPR	0.95214
NAALADL2	0.951305
EFR3B	0.951072
MOBKL1B	0.951023
PXDNL	0.950886
SLC29A4	0.950835
MAP4K5	0.950791
LOC100190940	0.950689
FAM108C1	0.950502
ECT2	0.950048
SLAMF9	0.949416
LMO7	0.949023
MED12L	0.948855
ANO1	0.947864
SP5	0.947169
MYSM1	0.947073
SLC16A14	0.946695
PGAP1	0.946408
SLC8A1	0.946103
ARHGAP36	0.945273
EPHA2	0.945121
ZG16B	0.945039
C13orf37	0.944099
ARAP3	0.943779
AQP6	0.943776
HTR1D	0.943614
SNORD116-28	0.943597
MUC2	0.943504
CLIC6	0.943325
MAFG	0.943119
PLCB1	0.94283
LOC100133331	0.942424
FBN1	0.94231
SHROOM4	0.941733
SNX25	0.941309
BASP1	0.940455
PENK	0.940129
IL31RA	0.939916
DGKA	0.939077
BCORL1	0.938885
TMEM200A	0.938759
RASL11B	0.938694
ADAMTS2	0.938512
MAGEA12	0.938271
EIF5A2	0.938197
VWA5B2	0.938002
RBP2	0.93793
MYADM	0.937904
CCDC8	0.937898
TPSB2	0.937894
C8orf39	0.937697
KIAA1211	0.937675
LPAR4	0.937615
SUGT1P1	0.937346
RIN3	0.936976
TNNI2	0.936137
APOBEC2	0.936099
C1orf177	0.936074
PDZD7	0.935914
MPZL2	0.935887
PKNOX2	0.935827
PTPN20B	0.935581
HOXA9	0.935373
AJAP1	0.934695
ALG1L	0.934467
SLC45A4	0.934085
PHACTR2	0.933998
S100A1	0.933955
SLC16A10	0.93387
PRSS30P	0.933626
NBPF10	0.93339
NDE1	0.933329
PIWIL1	0.932789
ZNF417	0.932326
FAM171A2	0.932263
ZNF624	0.932205
PRSS33	0.932176
ZNF600	0.932059
BUB1	0.931944
CPA1	0.931622
CAMKK1	0.931368
MEGF10	0.930978
TMEM229A	0.930393
NCCRP1	0.930368
GMCL1	0.930219
PLEKHN1	0.930022
CCDC85A	0.929853
B4GALT5	0.929448
C21orf125	0.929346
ANTXR2	0.9292
FAM72B	0.928705
KBTBD7	0.928636
LOC100271836	0.928471
FUT4	0.928102
GAN	0.92742
ADAM23	0.927097
HYMAI	0.926673
LOC643008	0.926598
ARL6IP6	0.926549
CHD7	0.925874
MEST	0.925561
MEPE	0.925264
ZCCHC12	0.925089
WFIKKN2	0.923257
MAMDC2	0.923254
DDR1	0.923232
NKX3-1	0.92317
ZNF660	0.92287
OAS3	0.922798
EMR3	0.922676
KCP	0.922655
IMPDH1	0.922255
STAC	0.922249
CRLF2	0.921894
CLPS	0.921789
CCL11	0.921734
CEP170	0.921445
DOPEY2	0.921343
ISLR	0.920845
RASD2	0.920375
SAMD9	0.920333
LOC150786	0.920045
HPDL	0.919704
TRPM6	0.919288
KIAA1715	0.919168
QPRT	0.91858
STK39	0.918499
DEPDC1	0.918353
CDH8	0.918165
ACVR2B	0.917234
MIA	0.916955
PC	0.916787
FAM115A	0.916756
GTF2H2B	0.91629
CYB5R2	0.91598
ASXL3	0.91583
RETN	0.915723
KLHL38	0.915328
LOC400927	0.91511
ZNF641	0.914927
RASGRP1	0.914752
GPR20	0.914536
C6orf204	0.914317
GNA15	0.914221
SRGAP1	0.914169
ZNF701	0.913576
C17orf73	0.913542
BMP8A	0.913425
WTIP	0.912643
CPNE4	0.912095
DKFZp434J0226	0.912057
LAMB3	0.912029
C1orf127	0.912009
RAB15	0.911984
CCL8	0.911851
EFNB2	0.911437
C12orf53	0.911324
C15orf38	0.910997
SPRY2	0.909902
PCSK1	0.909828
WNT3A	0.90954
MANSC1	0.909212
OTUD4	0.907967
FOXE1	0.907782
HOXB4	0.907712
C2orf55	0.907519
TLR5	0.907158
SSX4	0.907
MYOT	0.906912
CHD6	0.906705
SH3BP4	0.906524
FOXL1	0.906362
LOC154822	0.906277
LOC100131726	0.906043
NPBWR1	0.906023
ZNF334	0.90582
TRPM8	0.905588
HIST1H2BF	0.905311
MGC42105	0.905222
C13orf23	0.904664
SLC10A7	0.904155
TTC39B	0.903955
DUSP13	0.903875
PALLD	0.90375
ATP6V0D2	0.903576
MGAM	0.903417
APOBEC3C	0.902474
SLC43A2	0.90221
PLXNA1	0.901647
TMEM64	0.901603
KY	0.901413
CTNNA2	0.901412
TFF1	0.901374
PCDHB18	0.901046
ZNF329	0.900881
SCG5	0.900848
KIF15	0.900393
ZNF619	0.900373
NKX2-3	0.900248
HTR1B	0.900185
IVL	0.900148
FOXF2	0.899368
CRTAC1	0.898789
PDP1	0.898403
THRB	0.8984
ZFHX4	0.897663
GPR153	0.897497
CLEC4E	0.897465
IL1B	0.897347
FAM89A	0.897026
KCNB2	0.896708
IFITM1	0.896558
EIF2AK2	0.896081
BLM	0.896023
PDIA2	0.895418
P2RY2	0.89541
PGC	0.895148
HEPH	0.894866
LOC100170939	0.894405
MAP1A	0.894299
DLG5	0.894292
HEATR5A	0.893944
OR2A7	0.893691
IQSEC2	0.893156
SHROOM2	0.893136
C20orf94	0.893099
PLEKHM3	0.89199
PLK4	0.8919
MIA2	0.891493
ELOVL2	0.891448
[truncated: 18,503 more rows]

## Sheet: COAD
GeneSymbol	logFC
NOTUM	2.19893
KRT23	1.83812
UNC93A	1.73092
PRSS1	1.70437
ABCC2	1.68743
TRY6	1.68103
XPNPEP2	1.61399
SYS1-DBNDD2	1.60671
F7	1.46899
NKD2	1.44907
CDHR2	1.42016
C3orf32	1.37769
SLC1A5	1.37265
KLK6	1.36387
LOC100124692	1.29345
NKD1	1.29108
FGF19	1.25697
H19	1.19944
SERPIND1	1.17951
KCNK15	1.16862
WIF1	1.16041
PHGDH	1.14847
DKK4	1.14724
ASGR1	1.14559
REG3A	1.14299
SULT2B1	1.12698
LOC100271831	1.12559
DEFA6	1.12504
LOC100127888	1.10255
KLK12	1.07284
LOC100133545	1.07179
SLC7A5	1.06493
SP5	1.06389
MYH7B	1.05858
TNNC2	1.04373
PKLR	1.04037
LOC100190940	1.01341
PGC	1.01097
COL9A3	1.00642
TTR	1.00509
C2orf54	1.00454
WFS1	1.00101
LY6G6D	0.997496
PPP2R2C	0.991993
KRT15	0.991018
DNASE1	0.987697
CEL	0.94865
F10	0.943714
RNF182	0.941423
FGA	0.939587
PTPRN2	0.936667
F2	0.935233
C12orf34	0.929773
TBX10	0.924225
SLC6A4	0.923759
TM4SF5	0.918605
CHAC1	0.90528
BOP1	0.90051
NTSR1	0.897074
SLC38A3	0.890893
LOC100132354	0.885565
ADRA2C	0.869927
FGFRL1	0.867949
AZGP1	0.858061
CPLX2	0.855926
IL22RA1	0.855614
DHRS2	0.85452
SPACA3	0.854007
FGFR4	0.848777
CYP2W1	0.848724
MEP1A	0.848483
TESC	0.84786
LY6G6E	0.846197
SYT7	0.846003
RPS28	0.843694
CDKN2A	0.84305
SLC13A3	0.835691
DPEP1	0.833069
PLA2G2F	0.827205
ZDHHC8P1	0.821071
AKR1C4	0.819581
SLC6A9	0.819349
KLHL35	0.81855
MLXIPL	0.81726
SLCO4A1	0.817124
CCL14-CCL15	0.816096
ABCA17P	0.815502
GPR37	0.814816
MYOM3	0.814712
TMPRSS5	0.812467
SLC13A2	0.812412
APCDD1	0.812053
FGB	0.81104
HPN	0.806545
GOLGA7B	0.805481
NKPD1	0.804661
ETV4	0.80071
NFE2	0.799633
PLEKHB1	0.799168
TG	0.798595
FBXO2	0.796472
DRD2	0.796046
SSTR5	0.795356
CPN1	0.794093
PKP1	0.793437
PDX1	0.793058
CYP4F3	0.793025
PRSS33	0.791429
ANXA13	0.790699
GDPD5	0.78743
SLC39A4	0.78407
PDZD7	0.783442
DLX3	0.781714
SLC38A5	0.781549
PLA2G4F	0.780668
PLXNB3	0.772159
BMP4	0.768762
PIPOX	0.766198
ATP11A	0.764287
ADM2	0.762993
CCL24	0.761211
FGF3	0.759306
SERPINF2	0.754357
KRTAP5-5	0.749596
C6orf123	0.749038
C19orf48	0.74805
CLDN9	0.745763
ZNHIT2	0.745462
SLC39A5	0.743534
RPS21	0.73901
TRIB3	0.738523
SLC30A2	0.737023
MTTP	0.735195
DEFA5	0.733241
MFSD2B	0.730023
C2orf70	0.72766
ALDH4A1	0.726842
GPR153	0.72614
GPR143	0.725899
SERPINA10	0.723315
C6orf15	0.718866
FOXQ1	0.717196
DUSP15	0.716423
ID1	0.714962
SRCIN1	0.712992
TGM3	0.711282
SLC2A1	0.710986
IGF2	0.709148
GGTLC2	0.706716
LOC148709	0.706388
GJB1	0.702027
FAM70B	0.700982
PLOD3	0.6998
UNC5CL	0.698579
GRIN2D	0.697523
CTU1	0.69662
PRODH	0.695382
MYT1	0.695177
L1CAM	0.694914
SHH	0.69311
SLC27A5	0.692851
PALM3	0.692342
HKDC1	0.687172
COL27A1	0.686912
ETFB	0.686111
BAMBI	0.68489
RASL10B	0.68481
CYP4F2	0.684583
DHDH	0.683862
ACCN2	0.682463
KCNH2	0.682098
RPL13AP6	0.680718
ARID3A	0.677884
EVX1	0.676616
BCAN	0.676045
GRIN2C	0.675851
POLR2I	0.675569
WNT4	0.672637
CYP2S1	0.66666
TMEM184A	0.666329
C21orf29	0.665268
GADD45G	0.665232
SLC25A6	0.665024
LYPD3	0.663926
HABP2	0.663804
KRTAP5-2	0.663745
CPNE1	0.662845
FAM101A	0.662191
ARSE	0.662141
NR1D1	0.661128
DDN	0.66024
CXXC4	0.660184
SLC7A5P1	0.659938
GGT1	0.65913
ATG9B	0.658753
SPTBN2	0.658497
ETV2	0.655771
GGT3P	0.655672
MOGAT3	0.653888
HOXD13	0.649185
SLC17A9	0.645209
MZF1	0.645057
BMP7	0.643393
PSAT1	0.642265
MSX2	0.641379
PNPLA1	0.640083
INHBE	0.639687
LRP5	0.639241
SLC23A1	0.63916
TMEM145	0.637708
NPC1L1	0.637682
AIM1L	0.637452
HEPHL1	0.637126
CLDN3	0.636964
WFDC10B	0.636572
SLC5A6	0.636103
ASNS	0.635147
C17orf77	0.634751
FBL	0.632346
KNDC1	0.632093
POLD1	0.63016
CKM	0.626075
OBP2B	0.624539
EPN1	0.624037
FREM2	0.62345
NEURL	0.622864
TM4SF20	0.621259
CARD14	0.621093
GPR44	0.620611
MEP1B	0.620609
INHBB	0.618732
SUSD3	0.618388
GPR157	0.61838
KRT40	0.617682
PRMT1	0.617613
VENTX	0.617135
HM13	0.615773
SERPINA1	0.615468
KIAA1875	0.615398
MUCL1	0.614186
SERPINA11	0.613733
LPO	0.612898
WDR62	0.612088
LIPE	0.612037
RECQL4	0.611907
CBS	0.61127
ARFGAP1	0.610827
SLC3A2	0.608982
E2F1	0.608603
PACSIN3	0.608346
UBE2S	0.607216
ANO9	0.606511
PAFAH1B3	0.605803
PHLDB3	0.60497
EPS8L1	0.604242
C20orf118	0.603197
C20orf151	0.602243
TSPO2	0.60208
RPL28	0.60055
ANXA9	0.600331
ANAPC11	0.597427
ZP3	0.597328
TMPRSS3	0.595806
ROMO1	0.595756
FABP6	0.595102
NR0B2	0.59481
ZBTB12	0.594486
ACOT7	0.59431
ZFPM1	0.593838
HPCAL1	0.593715
ITPKA	0.59351
SLC26A9	0.593476
LOC388796	0.59293
TNFRSF11B	0.592465
HOXA3	0.592061
TRIM28	0.590883
STX1A	0.588444
HR	0.587142
CELP	0.587069
SMOX	0.586968
NOSIP	0.58549
TH	0.583167
A1CF	0.58243
RASGRF1	0.582224
PVR	0.582213
SHD	0.582183
DLX1	0.581868
GPR172A	0.578792
POR	0.578123
PABPC1L	0.57775
STC2	0.576798
SLC1A7	0.576698
CYP2D7P1	0.576147
ST6GALNAC4	0.575185
TPSG1	0.575125
SEC14L4	0.57465
SRM	0.574504
TBX4	0.574033
ACOT8	0.57398
RUVBL2	0.573955
SPTBN5	0.573772
PRPF6	0.573554
GAD1	0.572797
REEP6	0.572575
HRCT1	0.571709
SNTB1	0.571275
SHROOM2	0.570838
SNHG9	0.570428
C20orf135	0.569263
ZNF579	0.568966
PRSS3	0.567707
LONP1	0.56747
HNF1A	0.566949
ALDH3B2	0.565916
CACNA1D	0.565323
SPHK2	0.565108
SOAT2	0.564817
COBL	0.564511
PPDPF	0.56432
CALML3	0.563408
COMT	0.56233
TEAD4	0.561919
MYADML2	0.561253
NME1-NME2	0.559896
GNB1L	0.558779
ADRM1	0.55739
C4orf48	0.557164
QTRT1	0.556159
MAT1A	0.555924
GP2	0.55566
AHCY	0.555372
PKDCC	0.554369
C20orf134	0.554242
CHTF18	0.554018
MYO15B	0.553542
SH2D5	0.553273
AGXT	0.5523
EEF1D	0.552228
ACTN4	0.551887
INPP5J	0.55155
TUBA4A	0.55152
RPS16	0.551369
GSDMA	0.550075
BAIAP2L2	0.549878
DHX34	0.549597
LOC100128842	0.548566
FAM71E1	0.548029
NEU1	0.547588
LOC440925	0.5469
SLC5A9	0.546497
TBL3	0.546346
IGFBP1	0.545203
SLC22A11	0.545123
PRAP1	0.544893
KRT83	0.544335
ODF3L1	0.544279
GRINA	0.544163
FOXA2	0.543947
EIF6	0.543725
CST3	0.542815
GAL3ST1	0.542711
RPL8	0.542464
NDUFA3	0.541938
DHDPSL	0.539522
EPHA2	0.538561
TMEM161A	0.538454
UPK3BL	0.537155
SNORD17	0.536755
LOC344967	0.536623
SLIT1	0.535958
RASSF10	0.535791
CGREF1	0.535281
SLC18A1	0.534861
ISM2	0.534804
HSPBP1	0.533995
NCOR2	0.533623
NXPH3	0.533454
AFARP1	0.533175
P2RY2	0.53307
ZNF628	0.532977
MAPT	0.532544
HSPA1B	0.532412
UCKL1	0.530883
GABRE	0.530479
TEX19	0.530309
C21orf90	0.530193
WDR4	0.529928
CEACAM1	0.529596
PUS1	0.528485
HIST1H2BH	0.5283
MYBL2	0.528235
EIF4EBP1	0.527566
DNTTIP1	0.527551
DUS3L	0.527526
PTDSS2	0.527502
PRR7	0.526515
TMEM147	0.526447
NODAL	0.526079
IGSF9	0.525793
EXOSC4	0.524533
FOXP4	0.524276
MARS	0.52374
PLA2G12B	0.522972
ABCB6	0.522075
FOXA3	0.521723
SLC26A1	0.520611
NTS	0.520258
IDH3G	0.519931
ESPN	0.518537
DSG3	0.518323
ADRBK1	0.517748
CBX4	0.517305
NR2F1	0.517166
FAM3A	0.516804
DDIT4	0.516111
TRIM15	0.516103
FEZF1	0.515787
PKMYT1	0.515263
AP2S1	0.515161
TPPP3	0.515046
C16orf13	0.515
CITED1	0.51498
VGF	0.514954
TTLL2	0.514672
LOC648740	0.514395
CBLC	0.514239
CHCHD5	0.514024
DUSP27	0.51399
PROX1	0.513752
GBX2	0.513541
TMEM150B	0.513253
NMNAT3	0.512971
ABCB9	0.511931
CYP4F11	0.511809
ARFRP1	0.511664
MFI2	0.511515
WDR13	0.511018
LOC92659	0.510448
RALY	0.510089
LOC100130331	0.509538
UBE2M	0.508992
KRT6A	0.50884
SCAF1	0.507592
ERGIC3	0.507156
B4GALNT4	0.50698
PAH	0.50571
RBM38	0.504878
POU5F1B	0.503904
TBC1D16	0.503887
CLCN2	0.503646
CDC34	0.502989
VIL1	0.502624
C5orf4	0.50202
PRPF40B	0.501717
SLC19A1	0.501584
GOLGA6L6	0.500606
LSR	0.500574
SRPX2	0.500388
USH1C	0.500374
SLC7A4	0.500328
ERN1	0.500229
RAP1GAP	0.49973
GPRC5C	0.499267
ZNF703	0.49877
ZGPAT	0.498136
NPRL3	0.498115
WFIKKN1	0.498025
CHST5	0.49754
CBX2	0.497441
TTYH3	0.496948
YY2	0.496876
SEMA3B	0.496459
TEKT4	0.495914
CNOT3	0.49576
FASN	0.495614
MRPL55	0.495608
TMEM63C	0.495521
IRF2BP1	0.495373
IRAK1	0.495296
CPSF1	0.495178
PRKCG	0.494925
ADRA1D	0.494722
PMFBP1	0.494283
SPNS2	0.494005
KCNJ14	0.493543
ZNF598	0.493119
C20orf27	0.492987
DMWD	0.492513
SLC43A1	0.492457
EVPL	0.492136
NPAS2	0.491815
FGF20	0.490938
STXBP1	0.490809
DOK7	0.490051
ASCL2	0.489948
ORAI1	0.489639
PUF60	0.489216
GTPBP5	0.4885
ENGASE	0.488288
C20orf20	0.488043
BCAM	0.487492
B3GNT3	0.487218
BCL2L1	0.487188
TOMM40	0.48674
GDF15	0.486356
SPATA2	0.486314
G6PD	0.486034
GATSL1	0.485552
LQK1	0.485395
SLC8A2	0.485342
RPS5	0.485047
PAK4	0.485033
PFDN2	0.485027
SPINK1	0.484762
ULBP1	0.484455
NAA10	0.484381
CDA	0.484256
PKP3	0.483976
ZNF324B	0.483777
TMEM191A	0.483608
CCDC124	0.48335
C21orf56	0.482963
INTS1	0.482761
TCEB2	0.481497
LOC644165	0.481423
PTCD1	0.481072
SLC7A1	0.481001
SUV39H1	0.480872
TFF1	0.480643
KRT80	0.480291
NES	0.480284
TIMM17B	0.479913
THOP1	0.479568
GPX2	0.47944
SCARB1	0.479303
CLDN4	0.479107
UMODL1	0.478684
TSNARE1	0.478656
SMARCA4	0.478498
LY6G6F	0.478354
CHST13	0.478303
LOC286467	0.478025
AGAP3	0.477857
PTCH1	0.477716
HNF4A	0.477687
SND1	0.47743
GLYCTK	0.477226
AKT2	0.477084
CDC25B	0.476302
MYH14	0.476161
PSMA7	0.475782
JOSD2	0.47526
GPD1	0.474839
TRAPPC5	0.474815
BRSK2	0.474653
NDUFS7	0.474423
HMGA1	0.474366
RPL18	0.474282
ALDH16A1	0.4741
ADAT3	0.4736
R3HDML	0.473547
PPP2R1A	0.473528
HSPA1A	0.47344
GRAMD2	0.473436
MSI1	0.472913
LRP5L	0.472633
STRN4	0.472363
HAP1	0.472038
MLL4	0.47186
NFKBIL2	0.471481
ZNF574	0.470927
LMTK3	0.470724
ZNF444	0.470245
P704P	0.470053
H2AFJ	0.469802
KRT8	0.469785
RIPK4	0.469723
PYCRL	0.46952
KCNQ1	0.469197
ATP2C2	0.469158
MNX1	0.468946
ZNF296	0.468902
POTEF	0.468449
GPR20	0.468267
PLXNA3	0.468046
FITM2	0.467985
PYCR1	0.46746
PRR5-ARHGAP8	0.46737
TMEM8A	0.467175
TIMM13	0.466993
ZNF335	0.466923
ITPKC	0.466681
PVRL1	0.466651
DCXR	0.466448
PCBP4	0.466441
C7orf52	0.466356
HIP1R	0.466008
TMPRSS4	0.46599
PIGT	0.46585
SFRS16	0.465805
FLJ46111	0.465304
SUV420H2	0.465004
BTNL8	0.464844
TGFBI	0.464684
TRAF4	0.463851
CELF3	0.463784
PQBP1	0.463617
SCRIB	0.463485
PLAC1	0.463233
LENG8	0.463124
DGAT2	0.463123
MYBPHL	0.463107
TBCB	0.462879
KRTAP5-1	0.4624
PPAN	0.462285
DVL1	0.462077
SERPINA3	0.461506
LSM7	0.461141
LOC100288778	0.461136
EGLN2	0.460934
EIF3C	0.460741
ERCC2	0.460639
LOC100132288	0.460636
PLEC	0.460471
EXOSC5	0.46019
PHACTR3	0.459404
GRHL3	0.459242
C20orf165	0.459052
ALG3	0.45897
S100P	0.458949
SLC7A5P2	0.458567
GNAZ	0.458202
CAD	0.458105
C11orf84	0.457776
KCNMB4	0.457773
LRP3	0.457752
HRAS	0.457466
SLMO1	0.45739
PNPLA6	0.457331
XAB2	0.456682
DLX2	0.456571
ADAP1	0.456366
SOLH	0.456271
NLE1	0.456055
KIF21B	0.456051
CLPB	0.45602
COL2A1	0.455799
HSF1	0.455579
EEF2	0.455474
C8G	0.455075
IHH	0.454849
LRRC36	0.454681
ZNF541	0.454272
LAMB3	0.454251
GPR56	0.454227
CHD5	0.453452
CLDN10	0.452912
SPACA4	0.452718
KCNH6	0.452527
PPAP2C	0.452245
FADS6	0.452055
RPS19	0.451809
SCAP	0.451503
IGSF8	0.451148
KRT19	0.450691
NCLN	0.450564
RGR	0.450511
SHB	0.450434
ARMC6	0.450143
GYLTL1B	0.450052
LPAR2	0.450034
AIP	0.449917
DNAJC5	0.449549
ERF	0.449493
FUT1	0.448973
EML2	0.448962
C19orf60	0.448944
MID1IP1	0.448328
HSD17B10	0.448101
DSG1	0.447795
POLRMT	0.447385
DGKZ	0.4473
TSSC4	0.446888
FURIN	0.446795
C7orf13	0.446274
MED25	0.445506
WDR18	0.44525
HSPA2	0.445163
TH1L	0.444884
FCGRT	0.444807
SYMPK	0.443959
ZNF593	0.443578
BLVRB	0.442975
PTGES	0.442766
SOX14	0.442216
SLC35E4	0.442134
C20orf46	0.442109
ARHGDIA	0.441794
DDX54	0.441439
HSPA6	0.441065
G6PC3	0.440819
CCDC85B	0.440673
KHK	0.440479
PLA2G16	0.440441
MRPS24	0.440401
ACOT11	0.440388
PLCG1	0.440344
CLCN4	0.440247
LOC100133612	0.439966
APBA3	0.439494
CDK18	0.439022
TIGD5	0.438923
RDH16	0.438763
FAM50A	0.438406
UHRF1	0.437586
C6orf108	0.437013
TECPR1	0.43692
LRRTM1	0.436858
CHN2	0.436669
INHA	0.436558
DGKG	0.436523
SNHG7	0.436078
WBSCR26	0.435752
RHPN1	0.435638
MIB2	0.435374
TMEM175	0.435095
SAMD10	0.435001
STARD10	0.434854
BIRC7	0.43398
WNK2	0.433841
RPS11	0.433803
PLCH2	0.433375
SLC22A20	0.433344
MCF2L	0.433309
HAUS7	0.433115
GPT2	0.433064
PSMD3	0.432989
MYO1A	0.432791
RPL18A	0.432714
GPR83	0.432627
RPTOR	0.432599
NAALADL1	0.432592
MORN3	0.432313
SP9	0.432206
FAM83H	0.432148
ITLN2	0.432047
RPS2	0.431895
TUBB3	0.431604
DOCK6	0.431028
PRRG2	0.430679
PPP2R3B	0.4306
HSPB1	0.429724
LOC652276	0.429683
ITGB4	0.429158
CDT1	0.428413
KRT18	0.428394
LMF1	0.428389
INO80B	0.428355
GET4	0.428257
FKBP8	0.428214
CARD10	0.428051
HEATR7A	0.427856
DIO3OS	0.427462
GALK1	0.427449
DNASE1L2	0.427373
APOH	0.427182
DLL4	0.427149
PLB1	0.427079
TOP1MT	0.426961
GRB7	0.42668
LRP1	0.426623
TCAP	0.426309
AFG3L1	0.426044
RHBDL1	0.426044
SNRPD2	0.425718
C2orf82	0.425618
KIAA1199	0.424884
CORO1B	0.42451
VARS	0.424457
JUP	0.424348
MRPL53	0.424081
RRP12	0.423868
KIAA0802	0.423811
C12orf44	0.423779
C19orf28	0.423429
METTL7B	0.423326
HIST3H2BB	0.422981
LOC407835	0.422974
IGF2BP3	0.422508
KIAA1543	0.422472
UBE2MP1	0.422296
C19orf63	0.422215
PRKD2	0.421486
MBD3	0.421132
ATP13A2	0.421072
POLR2J2	0.420887
SIPA1L3	0.420815
LRWD1	0.420306
PEX16	0.420087
SCARNA12	0.419603
CABLES1	0.419489
FXYD5	0.419361
MED12	0.419307
ADAMTSL2	0.419063
SLC5A10	0.418986
C11orf2	0.418579
TMEM189	0.41838
TNRC18	0.418081
VPS28	0.418
LDLRAD3	0.417941
PORCN	0.41789
GRK5	0.417649
WDR24	0.417279
RIMBP2	0.416368
SCXB	0.416305
ZNF524	0.415923
C9orf140	0.415772
C11orf83	0.415579
AP2A1	0.415484
CEBPB	0.415477
SIGMAR1	0.415232
LENG9	0.414965
DHCR7	0.414842
KIF18B	0.414564
SLC15A1	0.414419
SNX8	0.41439
LOC619207	0.41416
SHMT2	0.414013
SCNN1A	0.413984
RBM10	0.41383
WFDC2	0.413239
BTBD16	0.413223
ASPSCR1	0.412589
GLS2	0.412387
MFSD3	0.412263
RASSF9	0.411908
RAB11B	0.41163
LRRC61	0.411619
SMAD6	0.411553
EBP	0.41134
PEPD	0.411188
GAPDHS	0.410907
CD97	0.410816
KIF19	0.410694
NUDT1	0.410693
RBM42	0.410609
ACSS1	0.410076
SPIRE2	0.409668
SNHG8	0.409457
CLPTM1	0.409362
TAS1R3	0.409033
DOT1L	0.409004
C8orf30A	0.408838
CYP27A1	0.408789
HPX	0.408773
DGKQ	0.408733
BCAP31	0.408307
LAGE3	0.407783
CEACAM19	0.407723
PRSS22	0.407648
DYNLRB1	0.407551
RPA4	0.407324
ENTPD6	0.407092
FAM100B	0.407012
WASH7P	0.406923
EME2	0.40688
MAD1L1	0.40635
MFSD10	0.406328
ABCC6	0.406215
PLA2G4E	0.406093
TUBG1	0.406082
MAPK8IP3	0.405854
LPHN1	0.405611
NPM3	0.40553
RRBP1	0.405529
PVRL2	0.4055
LOC146336	0.405475
PNKP	0.405099
ATP5EP2	0.404967
BTBD2	0.404805
LMNB2	0.404791
IFFO2	0.404383
SLC22A18	0.404072
TBKBP1	0.403812
SHKBP1	0.403543
SMOC1	0.403478
RPUSD1	0.403455
ARHGAP39	0.403095
TFR2	0.403026
EFCAB4B	0.402939
LIG1	0.40271
KIAA1161	0.402613
PSMG4	0.402561
METRNL	0.402388
TTC22	0.402235
NOC4L	0.402125
SLC12A7	0.401884
AKT1S1	0.401607
C21orf70	0.401565
ECE2	0.401548
CDHR5	0.401472
44813	0.401193
SPRR1B	0.401098
ZNF324	0.400999
ZC3H3	0.400901
OPLAH	0.400791
KPNA7	0.400547
SLC25A10	0.400312
RPLP0	0.400296
ZNF341	0.400146
SPC24	0.400018
TRMT61A	0.399872
SLC4A2	0.399782
AMDHD2	0.399756
GPS1	0.399689
TMEM104	0.399612
ZNF213	0.399528
TTYH1	0.399377
FBXL6	0.39922
NFKBIB	0.39917
DHX37	0.39912
AXIN1	0.398929
HSFX2	0.398699
DOHH	0.398394
USF2	0.398367
CXXC5	0.398299
PUSL1	0.398228
RNF43	0.398178
RBP4	0.397868
MIF	0.397862
PRR12	0.397859
LRRC8A	0.397751
CLCN7	0.39765
PRPF31	0.397615
REXO1	0.397473
ABCC6P1	0.397441
RASA4P	0.397409
CCDC78	0.397329
ZNF526	0.397098
TACR2	0.397058
PLTP	0.396888
MRPS12	0.396887
FZR1	0.396855
RBP2	0.396457
GPR35	0.3961
POLD2	0.396095
SRC	0.396093
CHPF	0.396046
FAM38A	0.396005
ZNF581	0.395862
S100A3	0.395651
ZNF750	0.395377
FBXO46	0.395071
TSTA3	0.394926
B3GNT7	0.394836
CABLES2	0.394803
TCF3	0.394719
PRIC285	0.394637
GALNT9	0.394567
VSTM2L	0.394479
XRCC1	0.394255
PRKCSH	0.394138
RASD2	0.394085
FKBP10	0.393984
PROZ	0.393924
DDX39	0.393777
TCP10	0.393598
LLGL2	0.393595
INS-IGF2	0.393513
ASMTL	0.393502
CD151	0.393476
TIAF1	0.393309
SAPS1	0.393258
UCKL1AS	0.393184
RPN2	0.393132
SPEG	0.39313
AGT	0.392865
KCNF1	0.392847
POLR3E	0.392279
FAM96B	0.392216
AADAC	0.392045
LAS1L	0.391971
SHARPIN	0.391885
STARD3	0.391549
DAGLA	0.391027
CLPP	0.390872
MLST8	0.390864
GNA11	0.390776
EIF2C2	0.390711
NEU4	0.390466
RBCK1	0.390363
ODF3L2	0.390291
PDZK1P1	0.390168
HEATR2	0.389688
MEGF11	0.389526
C10orf82	0.389107
MIA	0.388982
SAC3D1	0.388876
RNF157	0.388669
RPL19P12	0.388632
HSD11B2	0.388627
FLJ39653	0.388613
C17orf101	0.388508
ZNF414	0.388302
TSSK6	0.388254
KIAA1239	0.388197
RPLP2	0.388116
PLVAP	0.387794
KLK4	0.387793
CLIP2	0.387789
ZBTB45	0.387713
GPR115	0.387711
SFTA2	0.387709
MYPOP	0.38763
DHRSX	0.387491
TRIM3	0.38741
MAP2K2	0.387369
MAP3K10	0.387254
RELL2	0.386808
RCC1	0.386747
C19orf24	0.386715
RELB	0.386406
CYP4F12	0.386289
RHBDD2	0.386273
FAM58A	0.386216
TMEM53	0.386043
RAB36	0.385973
FIZ1	0.38501
PDK2	0.384951
OSGIN1	0.384848
C20orf199	0.384523
RARA	0.384504
CLEC18C	0.384434
MED24	0.384364
PPP1R15A	0.384361
TMEM201	0.384345
HCFC1	0.384287
C19orf71	0.384233
CENPM	0.38423
WDR90	0.384055
IRF3	0.383754
SDF2L1	0.383515
SCAND1	0.383499
CLGN	0.38345
FAM156A	0.383424
AZI1	0.383397
SERINC2	0.383328
SLC7A11	0.383239
MPP1	0.383189
DUS1L	0.383118
CHMP2A	0.383113
NOTCH1	0.383099
E4F1	0.383077
ADCY3	0.383054
DDIT3	0.382881
FAM173A	0.38271
PGAM5	0.382637
PTGES2	0.382536
TMEM86B	0.38252
ATP6V0A4	0.382481
SNRPF	0.382022
MRPS34	0.381959
CREB3L3	0.381923
DRD4	0.381874
GSK3A	0.3818
SNAI1	0.381774
RHOD	0.381732
C22orf36	0.381667
TECR	0.381661
YIF1B	0.381594
LCN12	0.381538
OBSL1	0.381182
SLC25A22	0.381144
EFNB1	0.381066
FAM128A	0.380958
WFDC3	0.38089
NAT9	0.380791
NOL6	0.3807
UBA1	0.380644
SOX8	0.380587
ARHGEF1	0.380462
ARHGEF19	0.38001
FIS1	0.380002
RNF126	0.379732
POLR3K	0.379633
ZNF653	0.379296
RRS1	0.37917
LRRC56	0.379076
CADPS	0.379039
CLDN15	0.378954
LOC401010	0.378648
GGTLC1	0.37856
SLC2A4RG	0.378465
C19orf61	0.378387
KIAA0415	0.378355
DCAF15	0.378328
TMEM160	0.378017
DPP7	0.377768
PHKA2	0.377676
B3GNTL1	0.377639
DLL1	0.377582
CYP2D6	0.37758
DAB1	0.37755
ABLIM2	0.377197
C7orf40	0.376896
SLC12A9	0.376793
PCSK1	0.376579
PPP1R16A	0.376345
WDR83	0.37621
TUBA1C	0.376183
HS6ST1	0.376173
EIF3B	0.376078
SSR4	0.376001
MTSS1L	0.375995
NCRNA00105	0.375385
HOXA6	0.375194
GPAA1	0.375175
AARS	0.375027
AGPAT2	0.374992
FAM131C	0.374779
PDRG1	0.374623
BCKDHA	0.37449
B9D2	0.374241
ATP5SL	0.374039
IDUA	0.373441
KRT36	0.373249
POLR2L	0.373228
ATAD3A	0.373009
SC65	0.372929
ANKRD19	0.372876
C14orf68	0.372331
KIF12	0.372309
GCM1	0.372294
TGIF2	0.372135
HPDL	0.3719
ZSWIM3	0.371604
NBPF6	0.371534
UBA52	0.371493
MAFK	0.371324
FKBP9L	0.371216
TMEM198	0.370956
AATK	0.370822
CLEC18B	0.370521
ITPR3	0.370269
LIN37	0.370199
SLC9A3	0.370181
C12orf10	0.369999
WBSCR27	0.369639
SLC45A4	0.369616
ATP6V0C	0.369532
PPP5C	0.369058
NOS3	0.369053
COL11A2	0.368959
FAM151A	0.368858
PLXNB1	0.36883
TRMT1	0.368684
SARS2	0.368675
AQP7	0.368655
CCDC19	0.368483
LOC339674	0.368288
ALPI	0.368283
PDCD2L	0.368259
ADCK5	0.368206
HGS	0.368199
NBEAL2	0.368178
WASH3P	0.368151
SPRN	0.368101
CYHR1	0.368032
NEURL2	0.367982
NDUFA11	0.367668
EFNA1	0.367624
NDUFA7	0.367615
GLTSCR1	0.367593
CUX1	0.367527
ATG2A	0.367511
SLC25A39	0.367337
PLA2G6	0.367208
PLEKHG6	0.367179
GIT1	0.367016
AMBP	0.367004
NPFFR1	0.366952
PDZK1	0.366942
C19orf29	0.366893
JMJD8	0.366795
ELFN1	0.366756
MYO10	0.366561
PHKG1	0.366513
CCBL1	0.366509
CLCN5	0.366278
JMJD4	0.366149
FUS	0.365987
SPPL2B	0.365865
UNC93B1	0.365827
LOC388152	0.365724
TINAGL1	0.36521
MCM7	0.365143
PTOV1	0.365127
COASY	0.365027
CCNJL	0.365017
SETD1A	0.364983
EHMT2	0.36482
KIAA2013	0.364748
RFX1	0.364432
CHDH	0.364387
WASH2P	0.364369
RPS15	0.364359
PI4KAP2	0.364308
POU6F2	0.36407
PCDHGB2	0.363853
CEP250	0.363824
MSX2P1	0.363769
SPINT2	0.363732
TUBAL3	0.363666
IMP4	0.363388
NTHL1	0.363199
SGSM1	0.363081
KPTN	0.362998
ZNF787	0.362951
PAF1	0.362791
FNDC8	0.362497
SEMA3F	0.362478
IYD	0.362392
RNASEH2A	0.362313
CENPB	0.361941
FCHO1	0.361742
DEDD2	0.361705
MUC17	0.361663
GDI1	0.36148
TRAP1	0.361335
C1orf89	0.361193
MSLN	0.361114
MED16	0.361069
CALM3	0.36104
AHSG	0.360988
C1orf113	0.360877
C2CD4D	0.36077
NPHP4	0.360627
PRKAR1B	0.360128
GRWD1	0.359863
ZNF784	0.359804
RTKN	0.359433
SH2B2	0.359152
PLAGL2	0.359133
RHBDF1	0.359006
PCIF1	0.358949
ORM1	0.358928
PHB	0.358854
B3GNT8	0.358798
DHX35	0.358789
IL1RL2	0.358771
KDM5C	0.358538
TJP3	0.358381
FAM83E	0.358308
NACC1	0.35826
MBOAT7	0.358094
ZMYND8	0.358081
CLEC18A	0.357716
APLN	0.357636
CEP72	0.357632
MAFG	0.357614
WASH5P	0.357561
CCDC22	0.357327
TUBB4	0.357138
GNG4	0.35679
CPSF4	0.356585
SUPT5H	0.35647
NOMO2	0.356368
DKK1	0.356315
MRPL23	0.356263
CCDC9	0.356199
FAIM2	0.356139
BCL3	0.356135
LOC127841	0.356129
ASB12	0.355771
NRTN	0.355644
NDUFA13	0.355387
CDK8	0.355367
PRICKLE3	0.355281
C19orf6	0.355134
TAF6	0.355073
HBA2	0.35496
TMEM63A	0.354854
AP3D1	0.354839
EIF3G	0.354813
ABCC10	0.354787
TBCD	0.354689
CTNNA2	0.354379
THRA	0.354266
ETHE1	0.354141
POLR3H	0.354139
FLJ35390	0.353895
BYSL	0.353832
ELF4	0.353375
PRR19	0.353256
SLC25A41	0.353144
MPST	0.352911
SNRNP70	0.352866
DGAT1	0.352859
TMC7	0.352774
HDAC11	0.352631
TAF10	0.352579
MSX1	0.352371
KLK14	0.352194
POLR2E	0.352134
JAG2	0.352042
ACVR1B	0.352012
NDUFS6	0.351817
EIF3CL	0.351766
ANKRD13B	0.351655
SGTA	0.351598
C2orf61	0.351544
AMPD2	0.351196
STK40	0.351073
RNF187	0.350923
TRAPPC9	0.350914
BBC3	0.350752
FGFR3	0.350596
CELSR1	0.350528
SLC10A3	0.35046
CRIPAK	0.350355
UBL4A	0.350163
SERPINE2	0.350146
CARS2	0.350027
C17orf96	0.349925
CEACAM6	0.349876
HBA1	0.349744
COPE	0.349654
FBLL1	0.349627
GRLF1	0.349533
HAGHL	0.349523
FLJ16779	0.349472
POM121L10P	0.349471
MYL6B	0.349383
GAPDH	0.34933
SH3TC1	0.349278
PLEKHG5	0.349247
ATP6V0E2	0.349134
EPS8L2	0.349047
NDUFS8	0.348879
PHLDA1	0.348844
STAP2	0.348629
IPO4	0.348596
C17orf70	0.348418
KLHL21	0.348117
PCBP3	0.347966
ESPL1	0.347858
OBSCN	0.34783
TMED1	0.347687
SBNO2	0.347646
GUCY2C	0.347628
SPATA13	0.347489
HDAC10	0.347378
CHID1	0.347022
CTU2	0.346931
AIRE	0.346871
CCNF	0.346774
NR2F6	0.34664
SAMD4B	0.346608
DTNB	0.346492
C19orf21	0.346283
IGFL4	0.346108
YIPF2	0.34578
ZNF580	0.345769
COPS6	0.345471
CCDC61	0.345389
MGRN1	0.345334
HS3ST5	0.345284
PLEKHG4	0.345249
BPIL1	0.345208
BCAR1	0.345164
IGF2BP1	0.345118
REXO4	0.345001
PQLC2	0.344948
TRAF2	0.344781
TELO2	0.344544
HES6	0.344487
ATP5D	0.344422
RABAC1	0.344346
SSNA1	0.344184
POLR2J	0.344164
RPL36	0.344079
SMTN	0.344034
TGM2	0.343997
KIAA1549	0.343935
ARHGEF10	0.343509
WNT6	0.343491
CARKD	0.343408
CARM1	0.343141
DCUN1D2	0.343017
ALOXE3	0.342361
EPN3	0.342303
SP6	0.342064
POLE	0.342018
ATP13A1	0.341941
PMEPA1	0.341666
LOC729991-MEF2B	0.341619
RPS6KB2	0.341495
ZFYVE28	0.341479
LRFN2	0.341466
MRPL4	0.341295
LRRC4B	0.341177
RPL31P11	0.340961
LOC613037	0.340884
KIAA0664	0.340864
ACAP3	0.340807
MAPRE3	0.340789
CHAF1A	0.340714
CPNE6	0.340631
YARS	0.340382
IFRD2	0.340376
GLTSCR2	0.340373
PLK1	0.340276
FAM100A	0.340172
C17orf89	0.340168
ZNF576	0.340044
RPL27	0.339919
LY6E	0.339841
NAT15	0.339827
MLL2	0.339822
PRELID1	0.33979
TNFRSF1B	0.339768
MRPS2	0.339629
SLC35D3	0.339621
C20orf24	0.339581
RRP9	0.339506
NDUFB7	0.339431
C20orf112	0.339265
CALY	0.33911
GIPC1	0.338883
GTF3C5	0.338804
PIGU	0.338687
ANKMY1	0.33864
SBF1	0.33855
SLC25A1	0.33848
ZMIZ2	0.338429
SLC22A3	0.338419
TIMM44	0.338393
SLC35C2	0.338028
PYCR2	0.337733
ATG9A	0.337596
PROCR	0.337284
DUSP23	0.337224
ZNF205	0.337216
SLC43A2	0.3372
GUSB	0.337132
ZNF710	0.337117
ATAD3C	0.336917
ZBTB17	0.336258
C9orf25	0.33618
PPFIA3	0.335815
CNTD2	0.335772
CDKN2D	0.335542
MORC2	0.335461
CDK16	0.335393
NAPRT1	0.335199
GJC3	0.335175
PANX2	0.335096
RNF128	0.334857
ZNF74	0.334784
NME1	0.334726
ATAD3B	0.334578
LAMC3	0.334458
ADCK4	0.334326
C19orf47	0.334193
C9orf114	0.334188
MRM1	0.334163
SART1	0.334051
USP36	0.334048
SH3GL1	0.333896
SSBP4	0.333874
CNKSR1	0.333754
ZNRF3	0.333718
TOLLIP	0.333548
IGSF22	0.333496
AKAP1	0.333207
PFKM	0.333173
U2AF2	0.333154
AP1M1	0.333075
GCHFR	0.332727
GNB2	0.332512
LOC391322	0.332486
SLC16A13	0.33237
APC2	0.332306
TNFRSF25	0.332093
GMEB2	0.331934
ATOH1	0.331826
PLIN3	0.331788
TMEM52	0.331621
EIF2S2	0.331497
NUDT14	0.331397
ZDHHC24	0.33135
HOXA1	0.33126
DNPEP	0.331252
CBX8	0.331234
FARSA	0.331094
STRA13	0.331054
TM9SF4	0.330876
LRFN3	0.330861
KATNB1	0.330625
SCLY	0.330515
RPL37	0.330335
C20orf117	0.330313
NCK2	0.330259
PAQR6	0.330205
UBE2C	0.330195
RPLP1	0.330009
UCA1	0.330003
LAMP1	0.329941
SNORA71A	0.329861
NNAT	0.329857
GTF2F1	0.32985
RPLP0P2	0.329779
CAPN1	0.329695
HIST2H2AC	0.329684
KRT6B	0.329551
NOC2L	0.329539
SLC9A3R1	0.329527
NUP62	0.329327
R3HDM2	0.329054
AURKB	0.328833
PCDH1	0.32881
KEAP1	0.328736
MBD6	0.328671
CYC1	0.328586
TMEM54	0.328537
TOMM34	0.32842
PGAM2	0.328383
ACTA1	0.328202
DCPS	0.328008
DNMT1	0.327817
GPN2	0.32753
TMUB1	0.327526
DNAH17	0.327391
SCAMP4	0.327144
MAGIX	0.327141
HSPB6	0.326937
LRRC10B	0.32693
RTN4R	0.3269
S100A5	0.326692
DBNL	0.32667
C6orf124	0.32665
CDC45	0.326432
HAUS5	0.326265
DDX49	0.326223
MUC5B	0.326211
NCRNA00182	0.326199
HUWE1	0.326197
PDXP	0.326105
C8orf55	0.326082
PSPH	0.326028
ZSWIM1	0.326025
ALKBH6	0.325785
SFN	0.325561
ST14	0.325547
MYO7B	0.325496
MVD	0.325301
MACROD1	0.325267
CAPNS1	0.325189
DDR1	0.325134
RBP1	0.324975
LOC80154	0.324877
LIG3	0.324777
GSS	0.324665
DPM2	0.324664
GATC	0.324569
PKD1	0.324453
UPK1A	0.324351
C6orf48	0.323962
RPL13	0.323913
NCRNA00116	0.32391
PEX14	0.323756
YDJC	0.323615
C19orf69	0.323612
PCYT2	0.323487
MGC14436	0.323461
OGFR	0.323381
MCM5	0.323037
MEPCE	0.322939
ARHGAP33	0.322907
FBXL19	0.32272
SH2D3A	0.322691
ZNF497	0.322676
TBL1X	0.322576
WDTC1	0.32251
DDX51	0.322438
RAB24	0.322389
TLE2	0.322328
TMEM222	0.322145
KLHL25	0.322035
FREM1	0.322026
HIST3H2A	0.321676
CTBP1	0.321642
TUBB2A	0.321562
CORO7	0.321507
ACOX2	0.321196
TINAG	0.321101
PCBP2	0.321022
MYCN	0.321001
FARP1	0.320979
PLXNB2	0.32083
C7orf47	0.320747
ATXN7L2	0.320716
KCNV2	0.320705
C11orf10	0.320632
PRMT7	0.320553
ZDHHC12	0.320483
GRTP1	0.320252
TMEM89	0.320231
C12orf56	0.320047
CHMP4B	0.320004
PI4KAP1	0.319953
NDP	0.319879
PVT1	0.319771
ZNF408	0.319751
HMGA2	0.31962
TFPT	0.319488
ABP1	0.319402
TBRG4	0.319322
SNF8	0.319138
DDX12	0.318969
SLC20A2	0.318932
TRMT2A	0.318725
FBXL18	0.318724
DDX27	0.318718
TCF7	0.318714
LOC400794	0.318675
MYBBP1A	0.318672
ATXN2L	0.318379
CLN6	0.318191
KRT13	0.318173
GRIN2B	0.31809
HOXA4	0.318068
AP1S1	0.317794
THNSL2	0.317737
KAZALD1	0.317611
SURF2	0.317541
TUBA4B	0.31749
DHPS	0.317437
SPINT1	0.317271
C17orf28	0.317269
EFNA2	0.317165
ESPNP	0.317164
ELMO3	0.317058
CGB5	0.317038
LGALS4	0.317037
KLHDC4	0.317026
SCARNA9	0.317003
CSPG4	0.31693
EPPK1	0.316828
OBP2A	0.316811
SKIV2L	0.316773
BRD4	0.316713
RPL13P5	0.316668
CYB5R3	0.316615
LFNG	0.316489
DDAH2	0.316484
SELO	0.31645
SCN5A	0.316413
BCL2L12	0.316354
TRAF7	0.316284
CCM2	0.316193
ATP6AP1	0.316074
CIT	0.316038
FAM22G	0.316037
DDX41	0.316008
DAK	0.315992
KLF16	0.315962
C7orf27	0.315911
C14orf80	0.3159
LTBR	0.315876
SNCG	0.315806
BTN1A1	0.315728
XPO6	0.315721
FBXW5	0.31556
RHBDF2	0.315533
PCDHGA7	0.31541
NLRP6	0.315377
IL34	0.315107
ZNF775	0.314681
CDC20	0.314608
KREMEN1	0.314507
GIYD2	0.314471
RPS3	0.314415
C16orf68	0.313999
RASSF7	0.313905
PRKCZ	0.31381
ATG4B	0.313794
SLC25A25	0.313748
DTX2	0.313427
ZNF668	0.313194
SNX32	0.313111
FOSL1	0.313075
PES1	0.313029
NSMCE1	0.312959
C16orf59	0.312937
EMD	0.312781
XYLT2	0.312671
EPHB6	0.312649
PAPL	0.31257
TRPV3	0.312357
RNPEPL1	0.312354
PTK6	0.312207
TPRN	0.312189
PLD6	0.312112
SUPT6H	0.311936
GHDC	0.311766
HSPG2	0.311426
RDH13	0.311329
LDLR	0.311244
CLRN3	0.311132
GNB2L1	0.311096
ACCN4	0.310704
FICD	0.310618
HIC2	0.310598
RNASEH2C	0.310408
IER2	0.310283
PITX1	0.310251
RNFT2	0.310141
CACHD1	0.310141
SRMS	0.31014
MOCS3	0.310106
FOXRED2	0.310055
SLC39A3	0.309782
KLK1	0.309758
FBXO44	0.309652
PSMB3	0.309485
KIAA0406	0.309478
CD320	0.309386
CHCHD6	0.309315
CASKIN2	0.309037
TNIP2	0.308983
GFOD1	0.308854
ACD	0.308823
SPRY4	0.308749
GOLGA6L1	0.308647
FLRT1	0.308647
MUC2	0.308441
TRIM54	0.308399
TSR2	0.308235
FBXL12	0.30816
PPRC1	0.307992
PDAP1	0.307851
TMEM101	0.307808
ATOH8	0.307704
ZFP41	0.307525
RPS27	0.307505
GATSL2	0.307337
DHX30	0.30733
AEN	0.307297
UBE2O	0.307228
MGAT3	0.307202
GARS	0.307107
ZNF517	0.306682
SEPX1	0.306473
ZNF696	0.306396
AXIN2	0.306287
NEK8	0.306228
METTL1	0.306002
PPP1R12C	0.305933
C19orf77	0.305872
ABAT	0.305721
COX6B1	0.305717
CTRL	0.305529
C15orf39	0.305477
GYG2	0.305467
CAPN5	0.305263
LOC25845	0.305151
ATP5I	0.305075
PLEKHJ1	0.305001
C7orf50	0.305
UPF1	0.304967
VANGL2	0.304945
MDH2	0.304689
BAX	0.304326
SNRNP200	0.304274
SOX2	0.30401
NHSL1	0.303948
CTSZ	0.30394
LPIN3	0.303871
NOMO1	0.303726
B3GAT3	0.303715
ZNF358	0.303513
LMO7	0.303491
NOP2	0.303278
CAB39L	0.303251
CCNE1	0.303165
TIMM50	0.303126
DDX11	0.303075
WWC3	0.30279
DRP2	0.302772
BET1L	0.302659
SLC16A5	0.302452
VWA1	0.302281
MAPK3	0.302273
SOX13	0.302054
GCOM1	0.301779
GSTP1	0.301461
WHSC2	0.301183
HOXB5	0.301009
CPSF3L	0.30097
KLHL36	0.300943
MSI2	0.300893
RAB40C	0.300828
GGT7	0.300783
CHAD	0.300751
ZNF473	0.300742
KCNAB2	0.300607
TROAP	0.300478
SLC6A7	0.300268
CDK10	0.300149
ISOC2	0.300143
DNLZ	0.299903
PTPRF	0.299687
RPP21	0.299536
BAIAP2	0.299422
UBC	0.299386
NSDHL	0.299357
CRYBB3	0.29932
KIAA1274	0.299313
PHLDA2	0.299208
INCENP	0.299127
DNM1	0.298914
TUBGCP6	0.2989
GRAMD1A	0.298824
NPEPL1	0.298635
NINJ1	0.298605
RANGAP1	0.298582
MAZ	0.298577
TCIRG1	0.298459
PTRH1	0.298451
SAE1	0.298361
NUP188	0.29833
PKN1	0.2981
OTUB1	0.298041
CYB561D2	0.297985
ZNF777	0.297941
REPIN1	0.297835
CCDC42B	0.297787
OGFOD2	0.297782
TUBB2C	0.297763
TFF3	0.297659
LOC339047	0.297584
PRSS8	0.297573
ZFAND2B	0.297543
PODXL2	0.297476
TRPC4AP	0.29736
S100A1	0.297232
HAGH	0.297224
SCT	0.297012
RAB11FIP3	0.29681
CRTC1	0.29671
UNKL	0.296565
ILVBL	0.296527
ORM2	0.296524
NPIP	0.296507
POLR2J4	0.296453
NOMO3	0.296409
CGB2	0.296341
NBPF4	0.296203
PPP1R13L	0.296138
RDH12	0.295823
CDC37	0.295734
ZNRD1	0.295501
FBXW9	0.295347
CA5BP	0.295324
MTG1	0.29518
POLR1A	0.295137
ARL6IP4	0.295123
LTF	0.294932
FRAS1	0.29478
QPCTL	0.294716
KAT2A	0.294712
HOXB6	0.294699
GPI	0.294609
PPP4C	0.294552
ARRDC1	0.29441
SEC14L2	0.294397
SOX9	0.294369
GPR17	0.29431
FKRP	0.294058
POLR2G	0.293874
DOM3Z	0.293809
MRPS26	0.293708
DGCR5	0.293685
KCNK5	0.293489
TMPRSS9	0.293467
C7orf59	0.29337
PCP4	0.293342
ACSL6	0.292988
NCOA6	0.292909
KIFC3	0.292862
SPRYD3	0.292768
IL17RB	0.292704
HRC	0.292671
LOC643677	0.292627
SMPD3	0.292427
RPL13AP3	0.292208
CBFA2T2	0.292144
RNF32	0.2921
POU2F1	0.29209
METTL11A	0.292078
KIAA1257	0.292058
USP11	0.291958
CEMP1	0.291884
ATP6V1F	0.291587
APOA1	0.291541
KLHL17	0.291461
SPNS1	0.291414
GALR2	0.291191
PHRF1	0.291174
C9orf69	0.291151
ASL	0.291066
PLXNA1	0.290961
TMED9	0.290939
PIWIL1	0.290919
SLC16A11	0.290823
ADA	0.290798
THOC4	0.290713
CGNL1	0.290652
DBF4B	0.290612
ACTG1	0.289992
NME4	0.289935
POM121	0.289861
YIF1A	0.289828
GAK	0.289816
RAB11FIP4	0.28981
FAM108A1	0.289782
MAP1S	0.289765
RPL23	0.289545
NR1H2	0.289464
ABHD12	0.289463
PNPLA2	0.28941
PLK5P	0.289208
STK25	0.288678
RHOT2	0.288655
TBC1D17	0.288569
PILRB	0.288531
KCNH4	0.28851
NT5DC2	0.288342
FER1L6	0.288233
IFITM3	0.288144
RPL30	0.287927
PEMT	0.287918
HIF3A	0.28791
C19orf73	0.287858
ARF1	0.287669
ATP6V0A1	0.287656
CTNNBL1	0.287602
PCNXL3	0.287515
SIVA1	0.287466
GDAP1L1	0.287419
UFSP1	0.28741
CLPTM1L	0.287388
HYAL2	0.287358
MON1A	0.287268
AARS2	0.287174
RPS14	0.286921
ZNF692	0.286902
KSR1	0.286798
SSSCA1	0.286639
NFE2L1	0.286599
C17orf73	0.286556
TAF15	0.286527
UNC45A	0.286515
HDAC5	0.28651
RAD54L	0.286422
EDC4	0.286105
C19orf55	0.285966
SYTL5	0.285749
PSMC4	0.285599
C19orf53	0.285584
TMEM205	0.285552
ELOF1	0.285436
BANP	0.285364
IGSF9B	0.285361
SRPR	0.285334
MED22	0.285321
TBC1D3G	0.285241
NACC2	0.284726
ZNF71	0.284667
MCOLN1	0.284658
PQLC1	0.284618
NHP2	0.284529
EMILIN3	0.284517
NUCB1	0.284437
LMAN2	0.284259
RAVER1	0.284256
SLC29A2	0.284157
AP2A2	0.284039
FAM53A	0.284017
PGS1	0.28396
ATG4D	0.283797
ANKRD9	0.28374
C17orf90	0.283675
RFNG	0.283645
PSEN2	0.283399
TNPO2	0.283193
SLC45A3	0.283099
SRF	0.283082
[truncated: 15,494 more rows]

## Sheet: DLBC
GeneSymbol	logFC
ORM1	4.0986
MT1H	3.92597
ORM2	3.80531
MT1G	3.7228
AQP9	3.3763
GFAP	3.244
CES1	3.21119
SERPINA3	3.17143
CA9	3.1293
PTPRR	3.08672
GRB7	2.98105
SERPINA5	2.97274
CHI3L1	2.9501
SPP1	2.91336
PKP3	2.90172
TREM2	2.81744
APOC2	2.76824
MAGEB2	2.73591
SIGLEC15	2.72734
MAGEA9B	2.69778
MT1M	2.61874
C15orf48	2.61194
FAM101A	2.60627
LEP	2.58327
CT45A5	2.57816
HAMP	2.5164
MARCO	2.51029
SUMO1P1	2.50853
MSX2	2.4956
C16orf89	2.49335
GJB2	2.49199
TREM1	2.48079
WFDC2	2.45492
CHIT1	2.4374
S100A8	2.43644
KCNK3	2.42335
TMPRSS2	2.38098
LAMB3	2.36877
HES2	2.36244
AGR2	2.34685
PITX1	2.34444
CYP27A1	2.33912
ELF3	2.33299
SAA1	2.32021
PDZK1IP1	2.31206
ANKRD2	2.30703
PPP1R14C	2.29811
KISS1R	2.29599
CDKN2A	2.294
MUC1	2.29285
MGST1	2.28523
KLK3	2.27592
NDP	2.27565
CYP27B1	2.24354
CA12	2.22817
ALOX15B	2.22278
TRPA1	2.20188
PPP1R1A	2.19919
CLEC4E	2.19475
DAPL1	2.17074
CHGA	2.15762
VAT1L	2.15495
POF1B	2.11289
INPP5J	2.08624
KRT19	2.08375
FXYD3	2.08266
SPOCD1	2.07354
SULT1C2	2.07235
TM7SF4	2.07169
S100A9	2.06878
HTRA4	2.04628
KRT14	2.0421
RAB25	2.03547
CLEC4D	2.0352
TCEAL2	2.0264
MYH14	2.02238
CT45A1	2.02194
SEMA3B	2.02132
SFN	1.99979
TSPAN1	1.97917
MSMB	1.97319
ACPP	1.97015
GABRA5	1.96915
RAX	1.95375
CRABP1	1.95188
KLK11	1.94929
PSORS1C2	1.94339
LTF	1.94169
ETV4	1.93701
NUPR1	1.93576
LAD1	1.92407
PRSS8	1.91638
PLP1	1.91582
MAL2	1.899
OSGIN1	1.89789
VSIG4	1.89268
EMILIN3	1.88953
FCGR1A	1.87095
PVRL4	1.86519
CYP19A1	1.86134
STEAP1	1.85473
AZGP1	1.85419
CLU	1.84036
TRPM4	1.82628
PSCA	1.81692
WBSCR17	1.8156
CLDN7	1.81188
PLAUR	1.80711
SCNN1G	1.80247
PAEP	1.79997
FABP7	1.79684
ZFP57	1.79679
PGA3	1.79493
FLJ42875	1.79176
SEZ6L2	1.78973
SLC44A3	1.77826
STEAP3	1.77158
CHST6	1.76993
PTPRD	1.75314
CAMK1G	1.74832
PI15	1.74708
BCAT1	1.74642
G0S2	1.73222
C5orf46	1.73068
PLA2G2F	1.7281
F3	1.72677
SCARA5	1.72381
OVOL2	1.72366
WNT11	1.72343
PCP4	1.71837
ROR2	1.71753
BIRC7	1.71665
FSTL5	1.71561
TTC39A	1.71377
CKMT1B	1.71304
PGC	1.7129
CTNND2	1.7078
VNN1	1.70726
MT1E	1.69435
ASPHD1	1.69378
ABCA8	1.69157
MSLN	1.69133
COL7A1	1.68938
GABRB3	1.68089
SLAMF9	1.67852
SLC7A11	1.67664
IL8	1.67132
GGT6	1.67092
ANGPTL4	1.669
VMO1	1.66604
CHRNA1	1.66274
CILP	1.66093
SLC11A1	1.66082
PKP1	1.65372
OSTalpha	1.65294
LILRA3	1.65179
HPN	1.64777
PTPRZ1	1.6472
TM4SF19	1.64598
FPR1	1.64524
NPTX2	1.64348
C10orf81	1.64178
CTSE	1.63962
C11orf9	1.63956
SAA2	1.63512
LMO3	1.62863
MT3	1.62853
ARHGEF33	1.62821
DGKG	1.62211
ZNRF1	1.61842
PODNL1	1.61672
FCGR1B	1.61547
IL10	1.61282
HSD11B1	1.61234
F12	1.61124
SLC26A9	1.59261
UCHL1	1.59216
IGFBP2	1.59174
CSF3	1.58932
FIBIN	1.58804
C5AR1	1.58449
SLITRK4	1.58447
TJP3	1.58254
CLDN4	1.58224
PNMA2	1.58128
CT45A6	1.58051
FAM69C	1.57874
FST	1.57562
LDHD	1.57559
POPDC3	1.57443
FCAMR	1.57352
TNFAIP6	1.57333
PCSK2	1.57053
MT1A	1.56597
ESRP1	1.56352
CXCL17	1.55885
NKAIN4	1.55707
STXBP6	1.55484
SLC2A5	1.55312
HIST1H2AB	1.55263
PTPRN	1.55125
GFPT2	1.55098
SLC6A3	1.54912
TMPRSS15	1.54887
CST1	1.54817
VIT	1.54483
STAR	1.54297
MET	1.54283
SERPINE1	1.54108
DNAH7	1.53955
CKMT1A	1.53878
DPP6	1.53821
FAM20C	1.53373
GPRC5A	1.5314
FAM83E	1.52784
GLDC	1.52751
NLRP2	1.52598
MYEOV	1.52546
SERPINA1	1.52469
FCGR1C	1.52413
PDIA2	1.5154
ITIH1	1.51434
WT1	1.51381
LILRA5	1.51336
SOD2	1.51331
TRNP1	1.5132
FERMT1	1.50935
PHYHIP	1.50869
WNT2	1.50197
PLAU	1.50004
FPR2	1.49861
SH3GL2	1.49432
CT45A3	1.49393
TSKS	1.49235
HK3	1.49143
NCCRP1	1.49043
SRPX2	1.48885
GDF15	1.48
CCL15	1.47607
SLC4A4	1.47581
CATSPER1	1.47529
LY6H	1.4729
SCD5	1.47169
RASD1	1.47106
TMEM184A	1.46799
TF	1.46549
CREB3L1	1.465
SGEF	1.46393
FAM27C	1.45942
LOC100126784	1.45636
FAM27A	1.45491
LILRA6	1.45401
CST6	1.44951
LOC283050	1.44788
TMEFF2	1.44708
FAM46B	1.44682
SELE	1.44212
MAOB	1.44019
PRIMA1	1.43986
OSM	1.43781
PGBD5	1.43628
RYR2	1.4357
PMP2	1.43555
SDSL	1.43517
ADAMTS5	1.43512
ADD2	1.43445
HIST1H4C	1.43426
LYZ	1.43408
DHRS2	1.43395
MFAP2	1.43344
CCDC147	1.43126
SPDEF	1.42929
ITIH3	1.42826
MT2A	1.42665
MAOA	1.42646
BARX1	1.42316
KCNMB1	1.4188
ATP1A4	1.41763
TFAP2C	1.41628
SLC1A5	1.41585
C1orf116	1.41562
MMP2	1.41255
ARHGEF16	1.41223
HTRA3	1.40967
KLK10	1.40605
CITED1	1.40548
COL29A1	1.40451
WWC1	1.40095
ALDH1A3	1.3972
GPNMB	1.39675
NPHS1	1.39671
PGA5	1.39636
TEX19	1.39635
TG	1.39628
IYD	1.39525
STEAP2	1.3924
PDC	1.39068
FTH1	1.39009
SPOCK3	1.3882
RCN3	1.38662
CT45A2	1.3842
BBOX1	1.38205
DNAJC12	1.38177
BHLHE41	1.37916
CD163	1.37898
CRISP3	1.37883
CDA	1.37801
IGSF9	1.37769
PDPN	1.37707
FGFR2	1.37372
CHRNA3	1.37158
ZMYND15	1.37041
GP2	1.37027
ATP6V0D2	1.36991
FCN3	1.36437
DYX1C1	1.36368
HIST1H3I	1.35962
GATA5	1.35859
CLEC6A	1.35533
FN1	1.35385
COL11A1	1.35378
KRT7	1.35304
CCL11	1.35282
CFB	1.35266
FAM19A5	1.35243
PRLR	1.35177
SPHK1	1.35059
CACNG4	1.34744
MT1X	1.34244
FAM20A	1.33961
FAM155A	1.33763
GJB1	1.3373
HS3ST2	1.33587
LCE1E	1.33119
PIR	1.33065
KIF1A	1.3263
RGS13	1.32321
PTGDS	1.3225
C2orf54	1.32159
FFAR2	1.32152
CSTA	1.32003
SLC1A3	1.31908
PYY2	1.3183
GTSF1	1.3147
GPR84	1.31149
CSDC2	1.30883
NCS1	1.30821
DPF1	1.30132
NKAIN2	1.30109
SOX10	1.2999
EHF	1.29981
IRX6	1.29912
DPCR1	1.29601
CST4	1.2959
SDS	1.29376
DNAH8	1.29276
LOC389634	1.29242
TMEM119	1.29239
NRIP3	1.28945
HOXB5	1.2874
SERPINA11	1.28739
HIST1H3J	1.28502
CPNE9	1.28445
ROBO3	1.28391
AVPI1	1.28031
RAB34	1.28001
REG1A	1.27705
HS3ST6	1.27638
NRADDP	1.2758
C2orf72	1.2755
PDLIM4	1.27513
MAP7	1.27446
TMEM158	1.27429
CR1L	1.27404
LIPF	1.27278
NOTUM	1.27232
PLEKHG3	1.27127
CXCL1	1.27109
CDKN2BAS	1.27036
TRPM8	1.26992
TMEM144	1.26891
VSIG2	1.26778
PLOD2	1.26598
GRHL2	1.26404
MT1L	1.26339
CTSL1	1.26166
GLA	1.25874
ARSI	1.25803
OSCAR	1.258
TMEM151A	1.25746
SLC1A2	1.25538
LILRB3	1.25402
FTHL3	1.24788
KCNF1	1.24602
HIST1H2AJ	1.24333
SEMA6B	1.23894
CLEC5A	1.2383
MLPH	1.23829
COL5A1	1.23714
TIMP1	1.23549
TEX11	1.2354
MMP28	1.23385
FHAD1	1.23379
SLC2A4	1.23154
DCN	1.23125
CTSD	1.23059
SEC14L5	1.23012
GKN1	1.22873
LIMS3	1.22761
IGSF1	1.22747
SLC30A2	1.22656
SCRG1	1.22554
NKX6-2	1.22551
LCN1	1.2254
CST2	1.22458
RAP1GAP	1.2234
GAL	1.22117
RRAD	1.22041
APOC1	1.21956
ASS1	1.21924
TSIX	1.218
RCAN2	1.21718
COL13A1	1.21638
S100A3	1.21632
GRAMD1B	1.21605
TCF21	1.21589
PGA4	1.21565
BCAN	1.21424
KRT15	1.213
ASCL1	1.21245
FREM1	1.21234
TNIP3	1.21168
H2AFB1	1.21151
COL2A1	1.21142
ST3GAL6	1.20827
MUC15	1.20827
SIGLEC9	1.2077
S100A12	1.20755
USH1C	1.20633
KRT8	1.20606
RAB33A	1.20546
PILRA	1.20519
KLK6	1.20362
HRCT1	1.20361
ELOVL3	1.19951
LIM2	1.1954
GAP43	1.19344
IGFBP6	1.19302
LGI3	1.19251
NNMT	1.19016
C6orf168	1.18845
TMC5	1.18769
PLA2G4F	1.18728
EMR2	1.18694
CSF2RA	1.18396
ERBB3	1.18253
ITGBL1	1.18068
CHRNA5	1.18054
CITED4	1.17992
PCA3	1.17974
RETN	1.17964
GABRP	1.17915
TMEM45A	1.17853
CTHRC1	1.1777
TRPV6	1.17717
LRRC15	1.17608
CAPG	1.17549
ASGR1	1.17437
CDCP1	1.17427
NR1H3	1.17247
CPA6	1.17215
DSC3	1.17134
TSKU	1.17051
CD33	1.16985
PLXDC2	1.16907
PROM2	1.16826
MMP14	1.16791
C11orf52	1.16755
FUT9	1.16533
SLC22A4	1.16501
SLC6A7	1.16356
ADORA1	1.16331
MAGEB1	1.16129
ZNF385B	1.16058
SH3PXD2B	1.16041
SFRP2	1.15973
FAM149A	1.15712
RARRES1	1.15689
CLDN3	1.1558
NQO1	1.15562
FCGR3A	1.15516
TMEM163	1.15482
UBE2S	1.15459
FOLR1	1.15447
GRIA3	1.15383
C5orf62	1.15334
SYT13	1.15067
CYP11A1	1.1499
TMEM150B	1.14746
NKX2-3	1.14728
STAP2	1.14626
LGSN	1.14543
HOXB13	1.14303
KCNJ15	1.14289
SALL1	1.14288
APOE	1.14005
ARHGDIG	1.13992
MOBP	1.1378
ISL1	1.13723
OLIG2	1.13592
HIST1H2AH	1.1358
AMZ1	1.13575
PLCH1	1.13561
S100A1	1.13453
ZBTB7C	1.13428
SOST	1.13362
CLDN1	1.13264
SDC4	1.1277
TYMP	1.12759
FOXD4L1	1.12676
HOXC5	1.12585
COL22A1	1.12443
TMEM59L	1.1234
TRIM31	1.12327
RAB13	1.12295
CTSB	1.12239
KRT16	1.1206
PLEK2	1.12017
BTBD16	1.12005
ATP4B	1.12
CLDND2	1.11998
C10orf11	1.1196
HS6ST3	1.11863
C8G	1.11701
WIT1	1.11688
HIST1H1B	1.11643
DDN	1.11596
ADAM23	1.11546
FAIM2	1.11423
HAPLN1	1.11271
UBL4B	1.11234
RGS8	1.1121
CBS	1.11141
CD300C	1.1101
HEPACAM	1.11007
NRP2	1.10829
TMEM132A	1.10734
MXRA5	1.10584
MMP9	1.10515
COL8A1	1.10472
KCNJ16	1.10421
PRRG2	1.1038
GRIK2	1.1024
GRM8	1.10141
CD36	1.10095
ACTL8	1.09978
SLC16A3	1.09961
TRPV4	1.09754
WDR86	1.09722
HMGCS2	1.09691
IGF2BP1	1.09444
ATF3	1.09384
CELA1	1.09375
CEACAM4	1.09362
CPLX2	1.0936
KCNK15	1.09331
C10orf47	1.09299
SLC6A17	1.09291
IGLON5	1.09114
WNK4	1.09112
OLIG1	1.09105
PLA2G7	1.09065
MYLK2	1.09042
CALHM1	1.08861
C19orf59	1.08817
CCBE1	1.08769
UCN2	1.08754
RIMS1	1.08562
SLPI	1.08511
IFI30	1.08461
MCHR1	1.08246
FAM119B	1.08058
MYO1A	1.07993
CXCL13	1.07882
FMO1	1.0775
C11orf53	1.07652
IBSP	1.07649
CLLU1OS	1.07632
SLC34A2	1.07622
JPH2	1.07621
OLR1	1.0756
INHBE	1.0756
SNAP25	1.07556
TMEM171	1.07541
KRT79	1.07434
SLCO4A1	1.07384
UNC13A	1.07298
PAQR6	1.07223
TFF1	1.07126
RNASE2	1.07126
UCK2	1.07009
LOC653786	1.06936
FOSL2	1.06893
SOX5	1.06802
MMP7	1.06801
GLUL	1.06726
HIST1H1D	1.06646
SCG3	1.06645
CNN1	1.06636
ONECUT2	1.06562
CTH	1.0654
TNFRSF12A	1.06326
RARRES2	1.06303
COL16A1	1.06279
CDK18	1.06095
GIF	1.05894
GALNT5	1.05809
SOCS3	1.05774
DYRK3	1.05725
FAM181B	1.05637
MPO	1.05635
CTSK	1.0557
P4HA3	1.05544
CP	1.05479
LTA	1.05238
ST18	1.05219
NDRG1	1.05147
PRSS36	1.05117
TXN	1.04969
LILRB4	1.04913
GPR3	1.04872
TMEM125	1.04692
FAM47E	1.04545
AK3L1	1.04508
KIFC3	1.04407
PSAP	1.04398
C22orf41	1.04395
P2RY2	1.04323
TEAD4	1.04295
SMOX	1.0424
PHLDA2	1.04126
CXCL16	1.04122
ATP6V1B1	1.04104
PRAME	1.04043
CRYAB	1.03979
CTXN1	1.03955
FLJ43390	1.0386
SEMA3C	1.03809
HIST1H4D	1.03666
TNFAIP2	1.03529
NEUROD1	1.03489
IP6K3	1.03475
CHIA	1.03426
IL18	1.03404
OTOS	1.03372
KANK4	1.03252
S100A16	1.03213
DNAH5	1.03187
ADAMTS2	1.03171
SPATS1	1.03117
HIST2H3D	1.03098
ANXA8	1.03069
P2RY6	1.02976
LASS1	1.02957
HAND2	1.02868
ARNT2	1.02814
CPB1	1.02803
NME1-NME2	1.0266
PTPRU	1.02484
HMSD	1.02453
GZMB	1.02405
H2AFJ	1.02404
TUBB6	1.02359
SLC38A5	1.02336
AP1M2	1.02332
AREG	1.02226
CYP2S1	1.0206
ADAMDEC1	1.01962
SYN2	1.01794
EVPL	1.01743
PYGL	1.01721
GPR1	1.0165
SCNN1A	1.0165
SYNPR	1.01644
GREM2	1.015
C11orf70	1.01469
ATP4A	1.01466
WDR66	1.01437
MFSD7	1.01391
TMEM56	1.01236
CEBPB	1.01068
S100A14	1.01041
GSTT2	1.0076
ARHGEF10L	1.00643
RCC1	1.00554
COL3A1	1.00527
KCNG2	1.00354
ITGB1BP2	1.00244
CLDN8	1.00227
SNCA	1.00205
DDO	1.00205
BEAN	1.00175
C21orf29	1.0006
CD63	1.00056
SCTR	0.997578
PVR	0.996359
ITGA5	0.99518
IGF2BP2	0.993507
CES7	0.993264
ACOT7	0.992092
COBL	0.991392
MRAS	0.989869
NKX2-1	0.989433
VWA3B	0.989232
DPCD	0.987275
TEKT2	0.986948
HHATL	0.986904
SULF1	0.986284
GPC6	0.985202
NCRNA00152	0.984657
C9orf98	0.983938
C17orf96	0.982992
ADAMTS4	0.980769
MFSD2B	0.978771
SHROOM1	0.978522
C15orf38	0.97829
CCDC80	0.978206
VASN	0.977198
LOC541471	0.977079
LOC100130238	0.976782
LIPG	0.976778
HSPA6	0.976106
GKN2	0.974747
FAM43B	0.973735
MOG	0.973703
SLC41A2	0.972439
CKB	0.971785
PPAP2B	0.971536
CHAC1	0.970307
PNCK	0.969896
HIST1H1E	0.969065
KAL1	0.968525
PPP2R2C	0.968523
HIST1H4F	0.968374
ECM1	0.967807
TEX9	0.967735
PRAM1	0.967641
FAM176A	0.966233
CD14	0.965035
SERPINB6	0.964845
CPXM2	0.963983
CCL7	0.963828
TMPRSS4	0.963216
LCNL1	0.963181
HIST1H3F	0.962178
DIRAS2	0.960442
ADA	0.960313
C19orf21	0.958956
MLC1	0.958916
HIST1H1C	0.957955
COL17A1	0.957744
HIST1H4E	0.956363
PLXNB1	0.955532
KRT17	0.953639
MUC6	0.953161
FZD5	0.952932
AK5	0.95232
CES4	0.951406
FOXA1	0.951314
SLAMF8	0.950969
SLC29A1	0.950822
PCSK5	0.950318
NPL	0.949582
FAM163A	0.949261
TCN2	0.949043
IRF6	0.946324
DKFZp566F0947	0.945401
SHISA9	0.945099
SLC39A8	0.944915
PAX8	0.944567
SGK1	0.944506
HIST1H2BM	0.944288
SLC43A3	0.944261
GPR153	0.943919
CASC2	0.943091
DLGAP1	0.942173
PTGES	0.941734
CD68	0.938679
PLA2G2A	0.938411
ADM	0.938358
SLC35F1	0.936572
GXYLT2	0.936398
SMPDL3B	0.936235
GPR158	0.936112
C10orf114	0.935573
SQRDL	0.935537
DHCR24	0.934848
C17orf55	0.934821
APOC1P1	0.933933
KCTD14	0.933526
PCSK1N	0.932801
FTL	0.931845
GLRB	0.931739
RASSF4	0.931578
SOHLH1	0.931536
TYRP1	0.931438
APLP1	0.931398
MOCOS	0.931
SH3GL3	0.930641
BEX1	0.930545
KCNE1	0.92997
COL1A1	0.929969
CCDC19	0.92941
AG2	0.929103
MLXIPL	0.928372
CXCR5	0.927187
GABRB2	0.926583
TTYH2	0.926005
AMBP	0.925981
MMP20	0.925355
FAM83F	0.925302
LILRB2	0.924422
SLC29A3	0.923881
GAL3ST1	0.922979
HIST1H3B	0.922407
RSPO2	0.922153
LRRC19	0.92207
TMEM51	0.92201
SLC4A3	0.92107
TERC	0.918696
TMED7-TICAM2	0.918636
CHST13	0.91806
FGF14	0.917993
LBP	0.917635
NKG7	0.917145
C19orf48	0.916986
C2CD4B	0.916116
FGF8	0.914123
CCDC8	0.914123
PFKFB3	0.913768
ADAMTS14	0.913612
AKR1B10	0.91353
CYP7B1	0.913504
INHBA	0.913412
APLN	0.91338
TRIP13	0.91319
LRP1	0.912899
PTGR1	0.91276
CCKBR	0.912584
LRAT	0.911936
HIST2H2AB	0.910997
SCD	0.910953
NRXN1	0.910478
KY	0.909401
EIF4EBP1	0.908957
SLC6A1	0.908281
LOC286467	0.907987
IL1RN	0.90785
C8orf48	0.907225
B4GALNT4	0.906797
H2AFY2	0.905624
GDPD2	0.905435
LOC387647	0.904776
CRYM	0.904378
OR51E2	0.904226
LOC100132288	0.904211
EYA4	0.903588
C12orf59	0.90355
NME1	0.902951
KIF19	0.902008
SERPINB10	0.900902
FOXQ1	0.900136
METTL1	0.899981
ISL2	0.899964
CSF3R	0.899434
EMILIN1	0.898462
CPT1C	0.898399
GOLT1A	0.89838
PLA2G2D	0.897849
SPR	0.897347
LAMC3	0.897319
NXPH4	0.896784
HSD3B7	0.896328
JPH3	0.895958
TRPM6	0.8959
COL5A2	0.89546
RAB20	0.895161
PRTG	0.89486
CYR61	0.8945
FCN1	0.894487
PPP1R1C	0.894308
PROM1	0.893795
FGF1	0.893777
LOC100127888	0.893036
CT45A4	0.892959
BMP1	0.892885
TMEM92	0.891685
WDR4	0.891405
KCNIP3	0.890668
CA2	0.890417
DCDC2	0.890165
ETV5	0.889936
KCNJ5	0.88938
C9orf140	0.888399
CCDC103	0.88743
MNDA	0.887376
PIH1D2	0.887016
GSTO1	0.886704
HOXD13	0.886272
SYT4	0.886235
SLC6A8	0.885489
FEV	0.883857
CYP4F11	0.883845
HSD17B14	0.883802
BMPR1B	0.883657
ACP2	0.882548
HMGB3	0.882136
ANXA2	0.882136
KCNE3	0.881727
TNF	0.880908
RGS2	0.880706
PLB1	0.879377
ARSE	0.879151
GPX3	0.878181
DMRTA2	0.878149
TUBA1C	0.878061
SNRPA1	0.877284
PDX1	0.876956
FSTL3	0.876818
PFKFB4	0.876562
COX7A1	0.876391
LOC100270710	0.875985
FAM198B	0.874934
SIGLEC16	0.874696
TMEM145	0.873589
SOX4	0.873449
MUC13	0.872986
C1orf210	0.8728
ENTHD1	0.872581
ANKRD1	0.872341
CHCHD6	0.872287
BCL2A1	0.871447
MYOF	0.870773
C9orf109	0.870341
AGXT2L1	0.869824
TYROBP	0.869043
HES7	0.86898
ACO1	0.868469
C21orf125	0.868216
GAS2L1	0.866964
ITLN1	0.866903
C8orf12	0.866802
LCN2	0.866782
NKAIN1	0.866686
FOXE1	0.866457
FAM124A	0.866239
GC	0.86578
PPP1R1B	0.865708
LYPD5	0.865393
PRKAA2	0.864911
HIST1H2BH	0.864767
HIST1H4A	0.864502
C6orf225	0.864288
RAB17	0.864134
C12orf68	0.86291
IL20RA	0.862659
C1orf226	0.862519
ADCY8	0.862504
MID1IP1	0.862362
LHFPL4	0.861926
B4GALNT1	0.861486
ITGB6	0.861371
DNASE2B	0.861007
PLAT	0.860974
RBP1	0.859278
GABRD	0.858139
NOTCH2NL	0.857902
PVRL2	0.85638
FNDC4	0.85628
RAB42	0.856053
PPP2R2B	0.856006
PLEKHA6	0.855736
TPM2	0.855207
KCNK1	0.854722
FOLH1	0.854652
PPIF	0.854438
C6orf105	0.853586
ALDH3B1	0.853013
PSAPL1	0.852686
PNLIP	0.852438
HIST1H2BF	0.852072
MCTP1	0.851066
RNF128	0.850547
XK	0.849669
RDH12	0.849272
PKLR	0.848574
RAB32	0.847806
FAP	0.847573
KAAG1	0.847386
GPR56	0.846836
SLC48A1	0.845766
MCM10	0.845701
CLIC6	0.845013
SLC2A3	0.844924
NBL1	0.844571
FLJ16779	0.843899
C14orf73	0.843657
PAMR1	0.843631
KCNK2	0.843388
GYG2	0.843331
ADH1C	0.842381
REG3A	0.841927
FAM129B	0.841874
C11orf74	0.841432
C11orf75	0.840913
MEIS3	0.840912
HIST1H2AG	0.839941
LOC150622	0.839836
C2	0.839796
OSR1	0.83946
CRTAC1	0.839443
ARID3A	0.838781
LOC80054	0.838689
COL5A3	0.837917
SLC25A41	0.837147
TFF2	0.837099
PDZD7	0.836415
HIST1H2BL	0.836399
PLCB4	0.836363
SLC22A18AS	0.835952
MAB21L2	0.835699
PKHD1	0.835545
CFD	0.834241
CSPG4	0.834154
NEGR1	0.834136
NOL3	0.833049
FAM26F	0.832893
APOL4	0.832844
MRC2	0.832418
IFI27	0.831948
MEGF11	0.831813
MREG	0.831008
KIF21A	0.830406
SERPINA4	0.830401
LUM	0.830339
FAM19A1	0.829768
TKTL1	0.829354
VSNL1	0.82911
CGN	0.827784
DAZ1	0.827657
WARS	0.827565
AGT	0.827146
CPNE7	0.827017
ANXA10	0.826924
C19orf51	0.826588
ATP1A2	0.825662
CHI3L2	0.825328
LIPI	0.825312
CCDC81	0.824686
CYP4B1	0.82437
ZDHHC11	0.824295
RTBDN	0.823802
HEXB	0.823527
DUOX2	0.823157
PC	0.823148
IL17RC	0.822996
KIR3DL2	0.822466
KCNN4	0.822337
TNFRSF6B	0.822248
C1QL2	0.82214
STC2	0.821768
CCL3L1	0.821151
EPCAM	0.821093
GRIA1	0.820629
MPPED2	0.818977
C1orf135	0.818819
F2	0.817777
KRT6B	0.817534
C4orf19	0.816734
HMOX1	0.816714
ANO7	0.816409
BMP2	0.815093
S100A11	0.815081
RIMS4	0.814713
KIAA1644	0.814334
SYN1	0.814146
FAM5C	0.813891
GPR110	0.813775
ST7OT1	0.813578
C2orf77	0.813464
CDH22	0.81323
RALYL	0.813189
STAC3	0.812797
NNAT	0.81208
NALCN	0.812074
ELOVL7	0.81196
C21orf70	0.811516
ANKRD34B	0.811074
GMPR	0.810433
CPA2	0.810353
HSPA1B	0.810014
TBXAS1	0.809732
S100P	0.809709
FAS	0.809668
TFCP2L1	0.809601
IL11	0.809345
CRYGN	0.809317
TMEM180	0.808918
NTN4	0.808674
VSX2	0.808518
CHRDL2	0.808389
psiTPTE22	0.80837
FAM181A	0.808277
MICALL2	0.807583
PRODH	0.807369
HAVCR1	0.807224
CCL23	0.806919
FGL1	0.806849
SHROOM3	0.806841
GZMH	0.806735
INADL	0.805451
CD300LF	0.805306
ALDH1A1	0.804902
OLFM4	0.804613
C9orf170	0.803752
SLC8A2	0.803638
FLNC	0.803013
HIST1H3C	0.802574
SLED1	0.802312
BATF3	0.801953
DDC	0.801398
ACTR3C	0.801255
FBP1	0.800603
SAP30	0.800552
SPATA12	0.799659
CA10	0.799538
ABI3BP	0.799176
C19orf33	0.799155
PLBD1	0.799079
LGALS2	0.798262
HMCN1	0.798051
FES	0.797774
SLC4A5	0.797638
CCL18	0.797612
NLN	0.797489
MDK	0.796712
BCL3	0.796468
TMEM200B	0.796341
MMP17	0.795573
RENBP	0.795263
MDH1B	0.79425
UPP1	0.794223
AS3MT	0.793975
CRHR1	0.793929
NFAM1	0.793602
KIR2DS4	0.792251
METTL7B	0.792159
CPM	0.792132
FGR	0.791127
LAMA1	0.791122
TALDO1	0.790989
CEBPD	0.790848
GLYATL1	0.790787
ASGR2	0.790511
CNTN6	0.790135
LRRTM3	0.790098
FKBP10	0.789737
TPST1	0.789688
HGD	0.789647
CREG1	0.789077
RND2	0.788634
DPYSL4	0.788611
PRDX1	0.788065
MAFF	0.787986
HAS1	0.787632
ANPEP	0.787291
LOC644172	0.786317
LOC389493	0.786233
KCNS2	0.785728
STOM	0.785559
CBR3	0.785488
BEND4	0.785464
CRIP1	0.783557
GLDN	0.783355
PCSK9	0.78322
HCK	0.782759
RTN1	0.782608
SLC31A2	0.782464
GAL3ST3	0.782321
ARL3	0.7811
ENOSF1	0.780887
CXCL5	0.780413
B3GNT8	0.780125
DNALI1	0.780086
MAPK15	0.779735
ANXA2P1	0.779301
C9orf110	0.778907
KCNE1L	0.778892
SLC38A3	0.778467
ARRB1	0.777301
SYNM	0.777007
PDZD4	0.776948
CCL5	0.775518
UPK1B	0.775293
CLIC3	0.774235
RGS11	0.77417
ME1	0.773683
SBSN	0.77339
HIST1H4B	0.773105
BCAS1	0.773047
TRY6	0.772723
CDCA5	0.772712
NOXO1	0.772555
SRCRB4D	0.772544
CBLC	0.772304
FA2H	0.772185
NPM3	0.77197
FAH	0.771894
TRPC2	0.771457
KIAA1210	0.769404
HIST1H2AD	0.768394
HIST1H2BO	0.768381
FCER1G	0.767512
ELMO3	0.766862
IQCA1	0.766614
ATP1B1	0.766037
HEBP1	0.764433
KLHDC8B	0.76425
FBXL2	0.764198
ACAN	0.763703
CALB2	0.763483
LRRC31	0.76336
SFTA3	0.763053
HIST1H4I	0.762757
ANKRD22	0.762661
IGFN1	0.762325
PCSK6	0.76212
LGALS3BP	0.76211
GPX1	0.761554
C17orf53	0.760466
CPNE6	0.76041
SPARC	0.759856
LOC344967	0.759379
IL15RA	0.759241
HIST1H2BI	0.759058
DUOXA2	0.758666
DOCK5	0.758172
ESYT3	0.758032
GPR85	0.757012
C7orf58	0.7568
CX3CL1	0.755864
ACOT11	0.755208
CMTM2	0.754954
KLRC2	0.754934
NEURL3	0.754437
CLDN11	0.753815
COL8A2	0.753309
SRPK3	0.753306
H2AFZ	0.753296
UGT2B7	0.753218
BYSL	0.753104
COL1A2	0.753052
FAM123C	0.752813
IQCJ	0.752564
EMR1	0.752274
LGALS7B	0.751892
TLR2	0.751476
DUSP9	0.751411
CHST8	0.750818
GRIN2D	0.750785
BAIAP2	0.750511
PLA2G5	0.750404
HIST1H2AL	0.749834
AGAP3	0.749761
DNASE2	0.749703
GNA15	0.749135
MMP23B	0.748866
DRAM1	0.748331
CLPB	0.748117
PPAP2C	0.747822
SPINK1	0.746651
KRT83	0.746336
ADAMTS16	0.745191
SPOCK1	0.744567
HEMGN	0.744417
PDCD1LG2	0.744399
PSMA4	0.744082
CAMK2N2	0.743997
LST1	0.743856
CEACAM6	0.743277
C3orf15	0.743229
ROGDI	0.742596
ATCAY	0.742459
NDUFA4L2	0.742448
DUSP1	0.742182
ZNF536	0.742137
RGNEF	0.741955
SAA4	0.741678
NINJ1	0.7416
C18orf56	0.741225
ALDH2	0.741102
ESRRG	0.740633
TAT	0.740366
CD300LB	0.739956
ZNF826	0.739791
SYT3	0.739704
RIMS2	0.739646
DUOXA1	0.739018
SORCS2	0.739009
ACP5	0.738643
ACADL	0.738574
LMNA	0.737817
FABP3	0.73772
RHBDL2	0.737515
GPR162	0.737501
SRD5A3	0.737375
AGTRAP	0.737323
RRP12	0.736974
MFAP5	0.736376
EPB41L3	0.736065
PDGFB	0.735385
OTOF	0.734937
XPNPEP2	0.734929
POLD1	0.734525
TPD52L1	0.733401
TTYH1	0.733349
TMC3	0.733237
MTUS2	0.732618
OLFML2B	0.731827
SIGLEC11	0.731042
KIAA0020	0.730648
FAM155B	0.730607
SRRM3	0.729712
SOX21	0.729405
ITGA11	0.729328
CTSZ	0.729095
KLHDC7A	0.728921
CGNL1	0.728148
PTPRH	0.727995
SLC27A1	0.727963
EPHA7	0.727175
PKMYT1	0.727023
CERCAM	0.726369
CWH43	0.726106
DLK2	0.725617
KRT6A	0.725403
CSTB	0.725346
SELENBP1	0.725273
LPIN3	0.724183
IDO1	0.72404
APLNR	0.723859
TBC1D16	0.723587
PDSS1	0.722903
CDC45	0.722641
LOC400759	0.722612
SCN2B	0.722336
AKR1B1	0.721994
RFX2	0.72096
CDS1	0.720922
ROBO2	0.720828
CYP17A1	0.720204
TIMM13	0.719357
LGMN	0.719277
ACSF2	0.718768
ATOX1	0.718345
C20orf46	0.718097
CCDC64B	0.718065
MAP1A	0.717624
USP43	0.716998
TOMM40	0.71684
ITGB3	0.71562
TSPAN11	0.715584
SLC5A11	0.715391
CKM	0.715103
PLXND1	0.714658
LGI2	0.714117
SNORA57	0.713998
FOLR3	0.713829
APOO	0.712967
LOXL4	0.712871
FBL	0.712214
BIRC5	0.71203
AP2S1	0.711814
ANXA2P2	0.711737
ASIP	0.711338
KIR2DL4	0.711085
QDPR	0.710393
RAD54L	0.710192
PTRH1	0.709832
TFRC	0.709644
NCRNA00087	0.709462
DSC2	0.70928
FUT7	0.709128
PYCR1	0.708529
LCN12	0.7085
SORD	0.707771
LDLRAD2	0.707702
RCN1	0.707683
PLAC1	0.707421
IER3	0.706986
CDC20	0.706974
PRKCDBP	0.706911
CAPNS2	0.706514
OSBPL6	0.706111
SCN1B	0.706026
LRRC26	0.705679
TMEM160	0.705619
PAQR9	0.705575
TIMM8A	0.705171
CHRNA4	0.704947
TMEM176B	0.704873
MADCAM1	0.704693
CCRN4L	0.704675
E2F1	0.704418
FABP6	0.704282
ITGB4	0.704246
SRCIN1	0.704047
ATAD3B	0.703625
CAMK2A	0.703393
CSDA	0.703372
CDC42EP1	0.703152
RANBP3L	0.702796
GSG1L	0.702715
ERRFI1	0.70254
PGD	0.702454
FGB	0.701833
SDCBP	0.701828
GSTA1	0.701773
GK	0.701554
GSTM3	0.701542
BRI3	0.701324
FCGR2A	0.700939
KIAA1244	0.700795
YPEL4	0.700507
MRTO4	0.700442
ALDH1L1	0.700386
SIGLEC7	0.69972
LOC286002	0.699601
MYO10	0.699402
SLC6A12	0.699299
ABCC8	0.698959
ST20	0.698832
TM4SF5	0.698822
IL31RA	0.698337
ZNF702P	0.698204
CDX1	0.698193
MAGIX	0.69812
PTN	0.698097
SEPW1	0.697526
FAM72B	0.697302
GCAT	0.69719
SIX2	0.697129
SAT1	0.69677
COL28A1	0.69583
CARD9	0.69582
FAM135B	0.695818
C1orf229	0.695704
MYBL2	0.695547
RPPH1	0.695434
CYP2C9	0.695359
SNTB1	0.695215
STRA6	0.695051
OSCP1	0.694445
HAUS7	0.694395
PLOD1	0.694261
COL11A2	0.694259
KLHL1	0.693752
ZNF676	0.692939
SLC25A10	0.692784
PPP1R14B	0.692361
PLIN2	0.691632
TRPM2	0.691564
CKS1B	0.691457
CD164L2	0.691106
HIST1H4J	0.690847
CCL8	0.690464
ISOC2	0.690184
LYNX1	0.690063
EGFL6	0.689966
CR1	0.689036
FAM151B	0.688773
CSF1R	0.688559
GSN	0.688362
TMEM176A	0.688326
HEPH	0.688207
KCNAB1	0.687731
STBD1	0.687214
CCDC149	0.687162
SCARB2	0.686785
CNTFR	0.685933
SLC9A3	0.685851
PAK7	0.685638
APBA2	0.685545
HIST1H3A	0.685329
TIMM50	0.685278
RASGEF1C	0.685149
DPYS	0.685083
PDGFRL	0.684994
MRO	0.684232
LSR	0.682503
TMEM30B	0.68248
SCGB2A1	0.682044
DMBT1	0.682005
MGP	0.68154
C14orf80	0.681524
RRP1	0.681506
CLEC11A	0.681127
SLC1A7	0.680846
TIMP2	0.680289
RND1	0.680154
BDNF	0.680046
C3orf36	0.679776
LOC92659	0.679287
NDUFAB1	0.678922
RSPH9	0.678494
FAM5B	0.678192
ATP2B2	0.678033
MPP4	0.677681
RARRES3	0.677597
C19orf76	0.67747
LARP6	0.677208
BHLHE22	0.677148
PRKD1	0.676758
HIST2H3C	0.676679
LOC100144603	0.676363
LOC440356	0.676158
LGALS4	0.676055
RTN4RL2	0.675693
TM6SF2	0.675537
DIO1	0.674927
TMC4	0.674664
CABYR	0.67432
PVALB	0.674236
HEPN1	0.673934
HSPBP1	0.673933
DGKB	0.672727
AQP5	0.672712
SLC25A18	0.672387
MUC5B	0.671977
LILRB5	0.671965
ESM1	0.671835
GMNN	0.671741
VAX2	0.671406
ODAM	0.671394
C10orf55	0.671291
ALK	0.670865
C19orf28	0.670836
TSPAN10	0.670812
RHPN1	0.67015
HAGHL	0.670138
TRAP1	0.669573
CYB561	0.669543
GLB1L2	0.669487
C7orf33	0.669424
MPP3	0.669203
ADRA2B	0.669077
PAPL	0.668749
TIPIN	0.668572
SST	0.66826
ACSL1	0.668139
NOC2L	0.667821
TBX3	0.667148
SLC2A14	0.666947
NMRAL1	0.666897
GPR123	0.666756
GABRA1	0.666617
DBC1	0.666511
MDFI	0.666273
PLA2G16	0.666155
OR51E1	0.666153
ZNF503	0.666061
SCARNA2	0.665797
AURKAIP1	0.665755
PLTP	0.665259
RAB31	0.664576
ZDHHC8P1	0.664365
SCIN	0.66433
ODF3B	0.664273
SNORA23	0.664219
RECQL4	0.663951
JUNB	0.663549
CALHM3	0.663387
TEKT5	0.662497
S100A2	0.662432
COL6A2	0.662263
AKR1A1	0.662053
KLRC3	0.661575
FAM72D	0.661569
LTA4H	0.661538
TYR	0.661508
C20orf56	0.661339
HNF4A	0.661317
FAM35B	0.660951
PTGIR	0.66082
C2orf65	0.660743
DBNDD2	0.660642
MRPL12	0.660599
IL6	0.66044
PCDHB5	0.659942
RRAS	0.659634
IER5L	0.659362
PIF1	0.65886
EFS	0.658835
KLK2	0.658527
CBR1	0.658494
SYT12	0.658419
PSMB3	0.658343
KLF1	0.65826
SLC35E4	0.657711
HBD	0.657665
LOC285401	0.657418
TYMS	0.65728
COL15A1	0.657117
HIST1H4L	0.656983
C7orf29	0.656939
HUS1B	0.656837
SYT1	0.656808
C1orf54	0.656655
C14orf156	0.656654
IFITM3	0.656574
TBC1D3C	0.656547
GBP1	0.655909
PLXNB3	0.655844
DHRS9	0.655387
SLC3A2	0.655375
LOC100128542	0.655347
TMEM86A	0.655115
TDRD5	0.654521
THPO	0.653904
PSME2	0.653879
TSPAN4	0.653789
FGFR4	0.653575
LOC728606	0.653542
ETHE1	0.653426
PPM1H	0.653417
MRPL14	0.653321
IGFBP4	0.653163
BID	0.653061
SELM	0.653057
BCL2L12	0.652886
RGS21	0.652811
PPARGC1B	0.651608
SSX5	0.651536
ALDH1L2	0.651422
TNNT2	0.65129
CLUL1	0.651182
PCOLCE	0.651173
ELAVL3	0.651012
KRT78	0.650947
DCUN1D5	0.650596
FAM72A	0.650407
GBGT1	0.650266
TM4SF1	0.650181
PADI3	0.650171
CBLN2	0.649907
MGC16121	0.649256
TMEM229A	0.649049
C1orf93	0.648875
EIF4A1	0.648479
UPK3A	0.648379
IL20RB	0.648241
PSMG1	0.648236
EYA1	0.648134
C6orf154	0.648108
PI3	0.648073
ISX	0.64783
CTGF	0.647828
LDHA	0.647206
LAMA2	0.6471
GLIPR2	0.647099
FAM19A4	0.647062
KCNJ12	0.646866
DNAJC22	0.646822
CD274	0.646434
SQSTM1	0.646349
NFKBIE	0.646239
DFNA5	0.646157
SNORA74B	0.646034
LAIR1	0.645886
HSF2BP	0.644979
ICAM1	0.644662
SC65	0.644385
RASEF	0.644201
DNAH9	0.643767
TFR2	0.643727
SERPING1	0.643549
SULT2A1	0.643544
BST1	0.643494
CEBPA	0.64318
THOC4	0.642418
CXADR	0.641799
C8orf4	0.641783
STAT3	0.640669
C14orf115	0.640403
FAM127C	0.63976
PRRT4	0.639666
SLC31A1	0.639517
HS6ST2	0.639396
FABP5	0.639384
GABARAPL1	0.638705
ECE2	0.638456
CYP4X1	0.638424
CNTNAP4	0.638373
MYO18B	0.63826
ENO1	0.638243
SIRPA	0.638012
LILRA1	0.637649
DPYSL3	0.63716
UBD	0.637024
LEPREL2	0.636996
LILRA2	0.63657
CALML5	0.636301
SLC13A3	0.636242
FOXF2	0.635818
PLAC8L1	0.635759
MTHFD2	0.635571
C12orf75	0.635491
RNF130	0.635111
LOC389458	0.63492
STK38L	0.634545
SIRPB2	0.63421
SPHKAP	0.634067
NCRNA00189	0.633691
HBE1	0.633637
SLC4A11	0.633546
SLC6A14	0.6335
HOXB9	0.633126
LCE1C	0.633101
AIF1	0.632916
SLC39A14	0.632333
VAMP5	0.632231
TNFRSF10C	0.632104
DIO2	0.631738
ABHD12	0.631708
PLS1	0.631398
SHC3	0.631109
ZNF697	0.631055
CCNB2	0.630575
C3orf55	0.630451
GADD45G	0.630424
GPRIN2	0.630314
CADPS2	0.630306
TMBIM1	0.629787
SLC47A1	0.629736
DIRC1	0.629703
AHSG	0.629697
ALOXE3	0.629598
C20orf108	0.629548
AURKB	0.62954
LRRC4C	0.62927
CDC42EP5	0.629148
C1orf190	0.629125
LUZP2	0.628765
SFTA2	0.628721
GDF1	0.628617
CLDN18	0.62855
PPIC	0.628515
NR0B1	0.628509
UNC13B	0.628043
ANXA13	0.628033
CYP8B1	0.628009
CDC42EP4	0.627848
RTN4RL1	0.627043
BATF	0.626731
GPX8	0.626453
PCYT1B	0.626434
SULT4A1	0.625791
WDR54	0.625474
PPAN	0.6254
C2orf82	0.625191
TMEM147	0.624927
SNORA48	0.624755
SRL	0.624059
UBTD1	0.623866
C2orf40	0.623778
ILKAP	0.623697
METTL11A	0.623522
FLVCR2	0.623446
CD151	0.62297
KCP	0.622687
CMKLR1	0.622634
RANBP1	0.622098
TSPAN15	0.621827
PDF	0.62163
CDC42EP2	0.621567
C8orf79	0.621555
KIAA0101	0.621443
FAM90A1	0.621165
CHRM1	0.620617
TIMM8B	0.620603
GCKR	0.620565
GUCY1B2	0.620481
EREG	0.620335
DGAT2	0.620202
NGFRAP1	0.619856
NME5	0.619624
CLEC12A	0.619609
NEU4	0.619328
CLDN19	0.619254
EMID1	0.618846
HSPA1A	0.618335
C21orf82	0.618332
FAM54A	0.61829
HMGN5	0.618259
GPC1	0.618068
METTL12	0.617903
TPO	0.617838
DDX11L2	0.617759
CPN2	0.617307
GAN	0.617124
EBP	0.616966
RPH3A	0.616912
ITGAM	0.616622
KLRC1	0.616605
MT1F	0.616565
PMEPA1	0.616542
PALM3	0.616329
SFTPD	0.616158
NAT8B	0.61603
CBX2	0.615331
KDELR3	0.615331
EPN3	0.61527
ZNF534	0.615185
CTDSPL	0.615039
ZNF204P	0.615038
CTPS	0.614995
THSD4	0.61479
CLMN	0.614786
SLC5A8	0.614744
ZNF385A	0.614328
ARG2	0.614236
PRR7	0.613806
PRR16	0.613796
CAPN9	0.613504
PCDH19	0.613299
CA11	0.613268
CRISPLD2	0.612986
NOS1AP	0.612963
ATP8B5P	0.61277
KCNK17	0.612767
SPIC	0.612099
NT5DC3	0.611355
PAH	0.611258
C5orf32	0.610706
C2CD4A	0.610207
PKM2	0.61017
TPI1	0.610035
FAM138F	0.609062
LOC389705	0.60892
MN1	0.607804
CDK4	0.607795
PCLO	0.607424
PUSL1	0.607346
TIMM10	0.607197
WFDC3	0.606647
STXBP5L	0.60644
DUSP5	0.606343
KCNT1	0.606146
PPIH	0.60601
ORC1L	0.605484
CABP1	0.605436
PLEKHH1	0.605332
CDH16	0.60527
CELF3	0.605206
SNRPD1	0.605175
SYT14	0.60461
MRPL4	0.604564
FAM164C	0.603415
CDH23	0.603211
KIF12	0.6032
PIM2	0.602763
C14orf68	0.602675
C12orf45	0.602373
GPR150	0.602275
SRXN1	0.602156
FAM108C1	0.602113
CLDN10	0.601697
LOC388796	0.601483
MTHFD1L	0.601035
CCNA2	0.600992
MATN4	0.600874
CEL	0.600615
CXCL2	0.599824
TBC1D9	0.599664
GADD45GIP1	0.59954
KLHDC4	0.599412
PTTG1	0.599371
VWA2	0.599031
ZNF593	0.598979
PCSK1	0.598978
BIK	0.598779
VSIG10L	0.5986
BCL2L14	0.598453
C20orf7	0.59844
SSTR2	0.598179
EIF3B	0.597998
ACTA2	0.597924
RABEPK	0.597751
ZNF205	0.597386
MRPS7	0.597134
KIAA1598	0.597122
RUVBL2	0.597065
CDT1	0.596934
NRTN	0.596806
CRLF1	0.596683
NOP10	0.596655
CCRL2	0.596646
CTAG2	0.59651
NOX4	0.596418
FSIP1	0.596091
C15orf63	0.596086
KRTAP17-1	0.595327
RHOBTB3	0.595043
TCTEX1D1	0.594947
TTC7B	0.594799
COX7B	0.594542
NAPRT1	0.594446
C1orf21	0.594382
ANXA3	0.594014
TAGLN	0.593966
NOC4L	0.593855
LMX1B	0.593854
RRP7A	0.593722
GPM6B	0.593483
POLR2H	0.593231
KCNS3	0.592806
GREM1	0.592765
ID4	0.592445
LYPD3	0.592295
KIF4A	0.592202
NAA10	0.592059
KRT13	0.591904
AOAH	0.591868
IGFBP1	0.591843
CHEK1	0.59164
SLC25A19	0.591396
EMP2	0.59139
SDCBP2	0.591275
EIF2B3	0.591166
C15orf59	0.591035
C16orf48	0.590367
ARL4D	0.590236
SERPINH1	0.589999
PERP	0.5895
MPP7	0.589454
XYLB	0.589402
AQP12B	0.589255
NRG3	0.589221
ST8SIA5	0.588784
F2RL3	0.588779
SYNC	0.588695
APOA1	0.588601
C9orf142	0.587927
HCG22	0.5879
SNORA26	0.587797
SUV39H1	0.587683
C1QTNF2	0.587367
C21orf45	0.587181
ATAD3A	0.587156
ICAM4	0.586807
ASAH1	0.58678
PPY	0.586711
MRPL20	0.586403
PGK1	0.586266
NUDC	0.586125
ABCC3	0.585768
SNORA53	0.585647
FLJ42393	0.585544
LSAMP	0.585005
POM121L8P	0.584944
HS3ST4	0.584926
HSD17B10	0.584774
MARVELD1	0.584591
CGB1	0.584567
LRP12	0.584546
GABRG3	0.584137
IPO4	0.584098
C17orf89	0.584006
LRG1	0.583981
EPS8L1	0.583602
AURKA	0.58352
HSPE1	0.582887
TIMM17B	0.582801
DSG3	0.582731
PAX9	0.58253
CFTR	0.582166
RAD51	0.582085
PLA2G3	0.582064
SSTR1	0.582009
CGA	0.581946
SCARNA16	0.581917
PLN	0.581847
NPC2	0.58149
TRIM47	0.581447
B3GNT4	0.581313
MAMDC4	0.5812
CD276	0.581046
CLDN2	0.580914
GLRX2	0.580843
[truncated: 18,503 more rows]

## Sheet: ESCA
GeneSymbol	logFC
ADH7	3.46998
CES1	3.1792
UGT1A6	3.03046
CYP4F3	2.98385
CYP4F11	2.9817
AKR1C2	2.93609
FGF19	2.90738
CPLX2	2.8894
CES4	2.66378
AKR1C1	2.56968
UGT1A7	2.56429
FOXE1	2.52832
CLCA2	2.37776
SOST	2.37698
GSTA1	2.35724
KRT6A	2.34465
AKR1C3	2.32489
CALML3	2.32083
CLDN8	2.28339
NTS	2.25714
PANX2	2.24079
AKR1B10	2.23946
SERPINB13	2.20439
KLK9	2.17463
SOX2	2.15318
SLC7A11	2.14631
UGT1A9	2.12621
KIAA0319	2.09295
ALDH3A1	2.08198
KRT13	2.07265
KRT5	2.032
ATP12A	2.02053
GPX2	2.00937
C1orf110	1.96446
CYP26A1	1.95803
DUSP9	1.94205
KRT4	1.9374
ABCA13	1.92217
OGDHL	1.92095
DIRAS2	1.9201
TP63	1.91552
NTRK2	1.91221
HOXD11	1.90763
SPRR3	1.90582
C10orf99	1.89299
C6orf15	1.87882
FZD10	1.86115
FETUB	1.85368
RPTN	1.83714
OSGIN1	1.8334
FSTL4	1.82249
FAM83C	1.82123
LPPR1	1.81083
LRP1B	1.81059
FOXL2	1.79861
SPRR1B	1.78985
ABCA4	1.78679
FREM2	1.78054
SCN9A	1.77641
STXBP5L	1.77413
SOSTDC1	1.75624
LASS3	1.74578
DSC3	1.7313
DSG3	1.73047
SPRR2A	1.7197
SPRR2G	1.71859
NECAB2	1.71128
QRFPR	1.709
KRT14	1.70829
KLRG2	1.69856
DMRT2	1.69557
JAKMIP3	1.69529
TMPRSS11D	1.69254
GSTM1	1.69041
PKP1	1.6868
S100A2	1.6796
PRAME	1.67658
CNTN5	1.67048
GBP6	1.66785
HOXC13	1.66712
GJB7	1.66418
SERPINB3	1.66232
LGI3	1.65628
SLC30A3	1.65351
HOXD13	1.65275
FGFBP2	1.651
SPRR2F	1.6407
CAPNS2	1.63096
SLC1A5	1.62667
NKAIN2	1.62212
NKX2-8	1.61872
IL1F9	1.61792
TGM3	1.60828
FOXN1	1.60771
TREML3	1.60711
LGALS7	1.5942
UGT1A10	1.59297
GSTM2	1.59107
PPP2R2C	1.5901
SOX2OT	1.58977
GABRA3	1.5847
ALDH1A1	1.58156
SPRR2D	1.57911
KRT24	1.57064
FGFBP1	1.56745
ARTN	1.56484
GSTM3	1.56209
NOS1	1.56062
CACNG4	1.55683
SPRR2E	1.55497
FADS6	1.54067
AADACL2	1.53826
KRT6C	1.52839
KRT15	1.52562
EGF	1.52335
LPAR3	1.51448
AKR1B15	1.50915
SRXN1	1.50726
SOX21	1.50648
DACT2	1.50538
SERPINB4	1.50321
B4GALNT1	1.50025
TRIM16L	1.49777
CHODL	1.49529
MUCL1	1.49007
SLC47A2	1.48653
ADCY8	1.47603
CCNA1	1.47579
G6PD	1.47427
HS6ST2	1.46301
SLC35F3	1.46286
EN2	1.4625
SIX2	1.45581
ZNF114	1.45135
PHGDH	1.43824
WDR72	1.43663
GPR109A	1.43639
ENTPD3	1.43452
FAT2	1.43403
GCLM	1.42918
POU6F2	1.42907
USH1G	1.42695
NKX1-2	1.42442
RHCG	1.4173
C1orf161	1.41637
GPC3	1.41457
DLX3	1.41414
WFDC5	1.41389
PGLYRP3	1.41221
CLCA4	1.41162
ALG1L	1.40787
NEFL	1.40742
DLX6	1.40731
C12orf56	1.40232
BNC1	1.39528
HOXD10	1.38026
NIPAL4	1.37524
TG	1.37398
C3orf72	1.36873
MPPED1	1.3664
CSTA	1.36369
AADAC	1.36324
HRG	1.3627
DAPL1	1.35676
SLC7A5	1.34615
TNNT1	1.34543
ADAM23	1.34172
S100A7	1.34052
GAST	1.34018
LY6G6C	1.33999
PNPLA1	1.33878
SOX15	1.33655
WNT7B	1.33574
TPRXL	1.33298
MYO3A	1.33071
WIF1	1.33062
SPRR1A	1.32805
WDR66	1.3251
UCHL1	1.32192
GPR109B	1.32084
ABCC2	1.31134
IVL	1.30905
S100A7A	1.30529
UPK3BL	1.30376
LAMA1	1.30044
ME1	1.29971
KLK13	1.29708
GJB6	1.2969
CABYR	1.29643
TBX4	1.29078
TMPRSS11F	1.29044
PAK7	1.28879
OLFM1	1.28827
PAPL	1.28132
LY6D	1.28125
GNG4	1.27887
TMEM63C	1.27652
DMRT3	1.27364
SLC6A15	1.27328
CNTNAP2	1.27236
KRT17	1.2637
TSPAN7	1.2632
KRTAP4-1	1.26302
VSIG10L	1.26236
MKRN3	1.26228
LGALS7B	1.26012
ABCB6	1.25707
CALN1	1.25668
KRT6B	1.25437
DLX6AS	1.25156
DHDPSL	1.2495
OR7A5	1.24924
CBS	1.24407
C14orf162	1.24294
SHISA9	1.24119
AFP	1.23887
C11orf87	1.23273
CBR1	1.23256
TMEM40	1.23157
IL1F5	1.22937
IRX4	1.22359
DKK1	1.22015
PTPRZ1	1.21987
GSTM4	1.21903
NXPH4	1.21006
UGT1A3	1.20949
CHST9	1.20682
CBX2	1.20501
VAX1	1.20403
PAH	1.20107
TPD52L1	1.20016
DLX5	1.19867
ETNK2	1.19038
GPR98	1.19001
CECR2	1.18879
MAOA	1.18388
TXNRD1	1.17994
FGFR3	1.17808
PTGR1	1.17746
S100A9	1.17582
SLC13A5	1.17576
KLK8	1.17565
DMRTA2	1.17265
SEC14L4	1.17242
WNT3A	1.17214
TGM1	1.16818
RIMBP2	1.1672
S100A8	1.16309
PAX7	1.16236
CYP2S1	1.16189
UPK1B	1.15898
SPRR2C	1.15894
HAS3	1.1589
C16orf74	1.15659
PCP4L1	1.15458
ADD2	1.15179
STC2	1.15076
GABRE	1.14473
KCNG1	1.14258
VWDE	1.13474
TGM5	1.13147
SBSN	1.13042
GPC5	1.12933
KLC3	1.12811
ABCA12	1.12484
NQO1	1.12332
GPR87	1.1228
FABP5	1.1219
MUC15	1.12083
RAB3B	1.1208
ODZ2	1.11913
TRIM29	1.11327
KRT31	1.11263
BMP7	1.10702
SLC1A6	1.10657
KRT75	1.10614
AMTN	1.10526
ZNF750	1.1046
FST	1.10307
LRP2	1.10209
GCLC	1.10102
LRFN1	1.10016
FLJ45445	1.09978
ERC2	1.09929
LRRC4	1.09741
LYPD3	1.09641
PGD	1.09367
GABRR1	1.09318
FBXO27	1.0928
HOXA7	1.0903
NDRG4	1.08968
HHIPL2	1.0879
TBX20	1.08748
GPR50	1.08662
EN1	1.08454
KRT1	1.08046
PSAT1	1.07839
PLA2G4E	1.07543
AFF2	1.07447
A2ML1	1.07251
LPA	1.07169
MRAP2	1.07153
GLDC	1.07136
GPR149	1.07025
ABCC1	1.06839
ETV4	1.06523
OTOP2	1.064
C2orf71	1.06343
NRG1	1.06152
ODC1	1.06112
CHP2	1.05434
FAM155B	1.0516
CXCR7	1.05093
PFN2	1.04526
ZIC5	1.04439
CDHR1	1.04424
BAALC	1.04252
GALNT14	1.0411
OTOP3	1.04046
RYR1	1.04016
SH2D5	1.03827
GATSL2	1.03739
TMPRSS11BNL	1.03539
STL	1.03385
BCAN	1.0323
SP8	1.02738
PI3	1.02685
GRHL3	1.02285
DNAJB3	1.02252
DCC	1.02133
HS3ST6	1.02108
ARL4D	1.01941
SUSD4	1.01886
TKT	1.0188
NXF2	1.01825
CDH26	1.01778
GAL	1.01614
KLK10	1.01569
SLC6A11	1.01555
TMEM116	1.01535
EPHX1	1.01468
HRNR	1.01286
ABCC5	1.0127
SLC39A2	1.01253
SLC2A1	1.01249
VSNL1	1.01113
DPYSL4	1.01043
AGPAT9	1.01024
HAP1	1.00845
ETFB	1.00533
TALDO1	1.00226
KCNG3	1.00141
DPF1	1.00039
SLC3A2	0.99987
SNX31	0.999857
BEX2	0.998061
ANKRD2	0.996918
SLC29A4	0.996602
LCE3D	0.995931
FMO9P	0.994263
MGST1	0.992191
KLF5	0.991661
SLC7A8	0.989803
S100A14	0.988359
KRT16	0.988023
TGM6	0.98715
VWA5B2	0.986421
TRIB3	0.985779
MAGEA9B	0.981489
GLI2	0.97715
ALOX15	0.976261
PCSK1N	0.972749
P2RY1	0.970993
SPOCK3	0.970723
B4GALNT4	0.970558
DLK2	0.963949
SALL3	0.963906
ZIC2	0.962932
PLAC2	0.961
IRS4	0.960629
GPC1	0.958745
MYCL1	0.958357
NAT8L	0.955076
TRPM1	0.95444
ARHGEF4	0.951366
ADCY10	0.950858
DGKG	0.950332
TRIM7	0.949822
CHGB	0.94548
FXYD3	0.943147
PRDM13	0.941201
CDH4	0.938176
IGSF3	0.935076
CGREF1	0.931481
RGS6	0.930665
SLC22A11	0.928279
UGT1A1	0.92745
ANXA8	0.926792
DSCR6	0.926486
MPP6	0.923279
ABCC3	0.921549
CALB2	0.918763
SLCO4C1	0.917205
TMEM20	0.917067
DSC1	0.911873
ALDH1L1	0.911807
LOC201651	0.909758
TUBB4	0.909509
KLK11	0.908161
TMPRSS4	0.90631
GSDMC	0.903833
HS3ST4	0.903479
FAM71E1	0.903182
GJB5	0.902959
AHSG	0.902769
SYT1	0.902506
MOSC1	0.901951
HSPB3	0.899176
SPANXC	0.896503
OTX1	0.895027
TM4SF19	0.894714
FAM190A	0.894623
TRPV4	0.894067
WNT9A	0.893751
DNER	0.892572
TPRG1	0.891539
RAB6B	0.890824
ZBTB7C	0.889627
IGSF11	0.889339
PIR	0.888531
CXCL14	0.887492
FER1L6	0.885397
PAX3	0.885133
SLURP1	0.885014
BCL8	0.884548
CHGA	0.883965
SLC6A4	0.882684
IQCA1	0.881111
SFN	0.880165
MAGEB2	0.877797
TNFSF18	0.877698
PCLO	0.874443
SPINK5	0.872436
C17orf99	0.872103
SCEL	0.87134
FTL	0.871149
MAGEC1	0.87078
C3orf16	0.870411
LMO1	0.869917
OTX2	0.868805
FAM83A	0.868341
CLDN20	0.867924
SERPINB5	0.866932
RAET1L	0.86572
LAMB3	0.864482
NRCAM	0.863815
ALOX12	0.86318
SLCO1A2	0.862947
RGS20	0.861564
OPRK1	0.859472
CA12	0.859106
CLEC2L	0.858479
MARK1	0.857259
ALDH3B2	0.857231
PRRT4	0.856027
THBD	0.853515
RNF217	0.852413
FSCN1	0.851199
SLC26A10	0.851181
PAX9	0.851142
FGG	0.850738
SERPINB2	0.849847
DDN	0.849337
NPAS1	0.848896
PRR7	0.844507
GSR	0.843267
FBN2	0.843144
DQX1	0.843009
LY6G6E	0.84278
FAM157A	0.839717
CGB7	0.839467
IL1RAPL2	0.838616
FERMT1	0.838104
ALX1	0.837704
DEFB1	0.836991
PGBD5	0.836567
P2RY2	0.836379
ULBP1	0.835441
EEF1A2	0.833425
IL1A	0.833387
DENND2C	0.832591
RAB38	0.831528
GUCY2E	0.828961
MYH14	0.828828
TMPRSS13	0.828458
NCCRP1	0.828207
DUOXA1	0.828127
C10orf90	0.827759
WNT7A	0.826326
HS3ST5	0.8241
KC6	0.821671
AKR1B1	0.82134
RPL7	0.821005
FAM59A	0.820107
HSD17B1	0.819461
PCYT1B	0.819203
TMEM189-UBE2V1	0.818823
NOTUM	0.81737
KLHL13	0.816864
PC	0.816838
DLX4	0.816076
PHEX	0.81533
BNIPL	0.814791
RUNDC3A	0.81398
GLT25D2	0.812317
LOC100133469	0.811191
KRT74	0.810885
LOC440173	0.810748
POMC	0.806782
C9orf169	0.805476
ZIC1	0.805369
RASSF9	0.805252
NAA11	0.803918
CLDN1	0.803511
NAMPT	0.803338
LOC730101	0.802265
SLC18A3	0.801843
TACSTD2	0.800425
ADHFE1	0.798356
NTF4	0.797195
MED12L	0.796039
SYT3	0.793059
NPR3	0.79161
GNASAS	0.789706
TRIM16	0.788409
SPERT	0.788209
S1PR5	0.787935
TSKU	0.787839
NAP1L2	0.787599
SCN5A	0.787119
PACSIN3	0.786836
PITX2	0.784788
CEACAM5	0.784376
OR7E5P	0.782456
GABRQ	0.781459
PTHLH	0.779998
FGA	0.779569
DNAH14	0.778353
NMB	0.778332
RASL11B	0.77785
KIAA1549	0.777339
NFE2L2	0.777018
C10orf47	0.776965
FAM83F	0.776774
PERP	0.773083
RNF17	0.769458
UGT1A4	0.768145
DGCR5	0.767453
HMGA1	0.765428
SLC47A1	0.765317
FZD7	0.764531
SULT2B1	0.762689
PPP2R2B	0.76151
FADS1	0.760089
GSTA2	0.759986
GSTP1	0.759612
SLC9A3R1	0.759204
PTPRD	0.75876
OSBPL6	0.758266
S100A16	0.757995
SCGB1A1	0.757885
C13orf36	0.757328
RHOV	0.756877
SLC7A4	0.755429
DFNA5	0.755418
DMRT1	0.754517
ALOXE3	0.754297
ATP6V0A4	0.753545
PTPN13	0.752722
TTC22	0.752717
SRRM3	0.752184
OXGR1	0.751461
NKPD1	0.750512
PAK6	0.7505
ANKRD56	0.749921
LMX1B	0.747843
DHRS9	0.747207
RND2	0.746592
ARHGEF35	0.746399
RBM11	0.745174
EPHX3	0.744934
SLC2A9	0.743108
RAPGEFL1	0.741324
WNT5A	0.740983
MFSD2A	0.740908
ABO	0.740776
CYP24A1	0.740404
LRP8	0.739341
ADORA2B	0.738146
CARD11	0.737904
ACPP	0.73523
F12	0.734611
SLC13A3	0.734572
ADM	0.734221
UGT1A5	0.733055
CYB5R2	0.732814
A4GALT	0.732198
HOXA1	0.731987
MGC87042	0.731814
STOX2	0.730853
S100A12	0.730158
IRX6	0.728467
DMKN	0.728218
LHX5	0.726286
IGSF10	0.725874
FAM110C	0.725747
BDNF	0.725745
COL4A6	0.724561
MAGEA1	0.724422
BCAM	0.723987
ADAMTS20	0.723494
C5orf38	0.723364
CHST2	0.72201
SDR9C7	0.721523
ANKRD57	0.72109
ASPG	0.720633
LY6G6D	0.7204
CEL	0.719757
FAM84A	0.71858
LOC285629	0.717998
LRRC8A	0.717404
FOXA1	0.717258
SIX1	0.717156
IGFL1	0.71705
C11orf92	0.715898
CKMT1A	0.715603
ANXA10	0.715396
SLC4A11	0.714858
LOC728613	0.714381
SLC12A8	0.713587
ECE2	0.713023
RNF165	0.712294
KRT34	0.711918
TMPRSS11B	0.711779
SESN3	0.71155
PTH2R	0.710829
ZP3	0.710301
SPTBN2	0.709327
KRT78	0.709152
OCA2	0.708375
SOX13	0.707765
PTPRT	0.706719
MLLT11	0.705855
ALOX12B	0.705474
CNFN	0.704778
APOH	0.70334
BAMBI	0.70183
LOC100133161	0.701759
IL20RB	0.699988
PYCR2	0.699859
RGS9BP	0.699765
OSTalpha	0.699552
FAM181B	0.699505
ZNF134	0.698004
MPP3	0.697805
LRAT	0.697398
PART1	0.696642
ANKRD13B	0.69632
KCNH1	0.695985
PRR19	0.695864
LOC152217	0.694699
SDK1	0.693356
ALG3	0.693343
MCM2	0.693097
WNT11	0.693067
SLC6A2	0.692432
TP53AIP1	0.692253
LUZP2	0.692064
GPRC5D	0.690361
GNGT1	0.690254
C17orf53	0.690052
MUC20	0.690001
SCIN	0.689759
EID3	0.68959
C19orf48	0.689024
CBLC	0.688993
ASNS	0.688801
FAM25A	0.688651
CPNE7	0.6882
CKMT1B	0.68733
MAP2	0.686855
MAPK8IP2	0.6863
SLC6A9	0.685733
FOSL1	0.685347
MICALL1	0.68489
BEST2	0.684369
IGF2BP1	0.683919
TBC1D2	0.68307
NKX2-5	0.682025
PRODH	0.681992
C3orf67	0.681923
DKFZp434J0226	0.681774
NELL1	0.681555
SLC9A4	0.680579
PVRL1	0.680286
THNSL2	0.67889
IGFL3	0.678744
CAGE1	0.678708
ANXA8L2	0.677438
IGF1R	0.677119
GJB3	0.676399
SLC20A2	0.673497
SVOPL	0.673013
PLA2G4F	0.671716
FOLH1	0.67153
HES2	0.671199
CCL26	0.670783
THOC3	0.670331
ZDHHC22	0.66909
DLX1	0.667845
C1orf31	0.667838
GSTM2P1	0.667832
TNS4	0.666996
MEGF9	0.666128
KIAA1045	0.665786
D4S234E	0.665144
TUBBP5	0.665068
SHROOM2	0.665025
WNK2	0.664563
GSTA4	0.664066
KLK12	0.663118
EXOSC5	0.66209
KLK14	0.661721
FLG2	0.66135
FRAT2	0.660526
FAM89A	0.660009
LOC92659	0.658895
UST	0.658584
RAP1GAP	0.657957
TXN	0.657767
BAIAP2	0.657375
COL2A1	0.657284
MFI2	0.657241
ADPRHL1	0.656145
CACNA1B	0.655746
PPL	0.655531
KNG1	0.65488
PCDHB2	0.654294
IGF2BP3	0.653761
FAM55C	0.653673
INE2	0.652977
KCTD15	0.652964
ATP1B3	0.652192
LRRC16B	0.652094
FGF3	0.651997
KCNS3	0.651937
NUP210	0.651476
SYTL5	0.650994
CHRNB4	0.65094
KCNV1	0.650356
RPS5	0.649521
SPIN2B	0.649156
NEURL	0.64826
SLC27A2	0.647876
IL31RA	0.647514
ELMO3	0.647369
LASS4	0.646783
INHBE	0.646381
UGT2A1	0.646214
CCDC60	0.645683
FANCE	0.645562
MDGA1	0.645452
KYNU	0.645211
C13orf38	0.644736
GPR115	0.642884
FBL	0.642713
GDF15	0.642483
FMO6P	0.640342
NPM3	0.639549
TFRC	0.636782
IGF2BP2	0.63673
EFNA1	0.636037
HTR7	0.636004
ID1	0.635806
VCX3A	0.635712
FGF12	0.635647
CHST1	0.635331
FAM83G	0.634864
ALDH3A2	0.634597
LHX2	0.63448
TTLL12	0.632828
MMP13	0.632481
LAD1	0.631857
FAM160A1	0.631856
LRP3	0.631584
TERC	0.630556
UMODL1	0.630461
CTSC	0.630006
TOP1MT	0.629947
MGC4473	0.629412
CDCA7L	0.628111
SGK1	0.627998
GCAT	0.627749
CREG1	0.625749
GLUD2	0.624759
COCH	0.624578
SLPI	0.624284
MEST	0.623271
C21orf15	0.622766
HESRG	0.622523
IRF6	0.622501
MMP3	0.622342
SEMA6D	0.622282
PLEKHG4B	0.622029
FAM43A	0.621552
OR7C1	0.621525
CYP4F22	0.621342
MSC	0.62093
SDC1	0.620649
ARHGEF5	0.620648
NKX2-1	0.620368
SOX12	0.619476
HBE1	0.619352
SLC27A5	0.619199
POLD2	0.619115
PITX1	0.618292
ISM2	0.618169
DLL3	0.617885
ZIC3	0.617031
FAM131C	0.616408
IL1RN	0.615479
CELSR1	0.615332
RPL39L	0.614973
PROM2	0.61479
TUSC3	0.614484
CACNA2D3	0.613814
B4GALT4	0.613653
MOBP	0.613362
SCN1A	0.613349
GALR2	0.613101
C5orf23	0.612986
PPP1R14C	0.611944
GYLTL1B	0.611542
SLC19A1	0.610906
THEM5	0.610835
CBLN2	0.610543
CT45A5	0.609829
HLF	0.609367
KRT3	0.608973
CBR3	0.608561
C19orf26	0.60846
C1orf177	0.608232
CPN1	0.60823
OOEP	0.60807
CTNNA2	0.607977
NLRP10	0.607753
PTDSS1	0.606324
SERPINB7	0.606016
NCRNA00099	0.605757
CEBPA	0.60519
SMO	0.605078
SLC9A2	0.603788
HSPB1	0.603178
KLF15	0.602407
RIT1	0.602039
TRIM28	0.601971
SLC1A4	0.601674
ADRA2C	0.601522
ST6GALNAC2	0.601444
HR	0.601412
HEY1	0.601029
CDC45	0.600193
ABCC11	0.599605
IPO4	0.599502
C6orf168	0.59916
SLC48A1	0.599135
SHMT2	0.599015
PPIF	0.598472
NCRNA00188	0.597921
SERPINF2	0.597397
SLC6A10P	0.597171
C6orf142	0.596578
ERMP1	0.595905
TFAP2C	0.595676
ZNF556	0.595616
CHCHD5	0.595323
B3GNT8	0.594381
AP3B2	0.593297
ELF3	0.593198
KREMEN1	0.592709
TCERG1L	0.591437
SLC37A2	0.590879
TOMM40	0.590464
PTPRQ	0.590272
ALCAM	0.590106
ZNF746	0.590074
PPFIA3	0.588423
SRCRB4D	0.588357
GSTT2	0.588288
SQSTM1	0.587853
FAM83E	0.587828
DUOX1	0.587647
SIPA1L2	0.587492
LOC100125556	0.587194
GJA3	0.58614
ICK	0.58603
RUVBL2	0.585316
WASF1	0.585113
MAPK12	0.584816
PYCR1	0.58461
PCYT1A	0.583946
GGH	0.583651
ACCN2	0.583364
COL7A1	0.583176
PRDX1	0.582231
CXCL17	0.582183
CRCT1	0.579729
SERPINA11	0.579443
TRDN	0.578473
EDARADD	0.578224
NME1-NME2	0.577807
RAC3	0.576867
SAMD12	0.57677
CBWD5	0.576042
IDH1	0.575661
PRG1	0.575506
PTPRS	0.574259
FOXQ1	0.573819
SALL1	0.573674
TDH	0.573458
SLC7A10	0.572678
KEAP1	0.571488
LDHB	0.570543
GLB1L2	0.569842
MAPRE3	0.569824
GOT2	0.569209
MAGEA5	0.569071
EVPLL	0.567971
FECH	0.566979
XPOT	0.56604
PKP3	0.564874
CTAG1B	0.564812
MYC	0.564478
MEGF10	0.563761
LDOC1	0.563486
ECHDC3	0.563378
LOC441294	0.562927
AIM1L	0.562547
CT45A1	0.562227
IMPA2	0.562001
PAGE2	0.561394
NRG4	0.561317
KIF1A	0.561161
ITIH5L	0.560853
ADCY3	0.560767
PCK2	0.560169
MAPK10	0.559969
MAGEC2	0.55892
IGFL4	0.558549
PRMT1	0.558268
SIAH2	0.558139
RPL3L	0.557281
ZDHHC8P1	0.556732
SLC5A6	0.556682
RUVBL1	0.556597
EPHB6	0.55656
GPI	0.556544
BOP1	0.556427
SH3GL3	0.556423
FGF8	0.555695
PEMT	0.555229
GARS	0.554549
B4GALNT2	0.554512
GPT2	0.554028
KRTCAP3	0.553359
GCSH	0.551765
FGFR2	0.551524
CHCHD10	0.55146
LY6G6F	0.551129
UGT2B4	0.551066
MUC21	0.551006
NLN	0.550526
DLX2	0.550418
DKFZp686A1627	0.549828
MAFG	0.549745
C2orf39	0.549103
P2RY6	0.548991
MDH2	0.548983
SLC5A10	0.548054
RPS16	0.547947
BCL6	0.547937
DUSP14	0.547837
SSTR5	0.547664
CDK5R1	0.547603
TEX19	0.547527
SNRPD2	0.547118
AQP4	0.546938
SLC7A5P1	0.546681
GPR56	0.545962
ZNF296	0.545703
SGCZ	0.545543
BCAT2	0.544986
TMEM189	0.544619
GLI1	0.543758
PAX1	0.543401
NR1H2	0.542242
MIF	0.542059
C9orf125	0.541948
MCM4	0.541824
RPS19	0.541505
IL1F8	0.54062
TRAPPC6A	0.540316
C3orf30	0.539716
ASPSCR1	0.539343
GPR161	0.539223
LOC348840	0.539087
GRM1	0.538966
EBPL	0.538963
ZNF256	0.538806
PPAP2C	0.538673
LOXL4	0.538336
OVOL2	0.538217
ST3GAL1	0.538055
GMPS	0.538052
ZIC4	0.537811
C20orf24	0.537296
DHCR24	0.536916
HS6ST1	0.536836
DSG1	0.536789
RPL18	0.536565
POLD1	0.535622
PPM1H	0.534671
CDH13	0.534514
GABRG3	0.534047
SHH	0.534031
RAD51	0.53365
PARD3	0.533414
GRHL2	0.532833
FAM83H	0.532607
MRPL4	0.53246
TNNI1	0.531881
CHAC1	0.531865
DUSP7	0.53178
CLDN4	0.531408
INA	0.531377
SPINT1	0.53122
TLX2	0.531003
C20orf27	0.530207
PRKX	0.530104
CPA2	0.529595
LOC202781	0.529402
CTAGE6	0.528877
PGLYRP4	0.528249
ALB	0.527792
EML2	0.527098
SCAND3	0.525555
FNDC8	0.525177
UBE2S	0.525157
HK1	0.525134
WDR18	0.525109
RBM20	0.524617
TBL1X	0.524468
MYBL2	0.524357
VCX	0.524317
AIF1L	0.524292
DPY19L2P1	0.523708
PYGL	0.523547
C1orf65	0.523309
RIPK4	0.523097
UMPS	0.523093
PSMD11	0.522999
KCNJ16	0.522747
SYT17	0.522713
STARD7	0.522071
YDJC	0.522068
GREB1L	0.521362
COL4A5	0.521043
HMGB3	0.521014
C10orf2	0.520845
NETO2	0.5204
CTAGE9	0.519994
RFPL4B	0.519687
TRPM3	0.519408
CKS1B	0.519391
NPM2	0.519099
FAM169A	0.518758
MMP10	0.518713
CPNE8	0.51853
RAB25	0.51845
NUDT11	0.517945
SLC10A6	0.517898
ACADL	0.517578
SCUBE3	0.516661
MANSC1	0.516497
DSG4	0.516374
CLDN16	0.516222
GLUL	0.516157
AARS	0.515798
LRRTM1	0.51571
SGEF	0.515606
POR	0.515606
FGB	0.515465
TSIX	0.515427
PCDH20	0.515414
CFHR3	0.514813
ANXA1	0.514803
NEBL	0.51476
TYRO3	0.514705
SNAI2	0.514563
C19orf73	0.514369
BMP3	0.514019
EMID2	0.513946
XPR1	0.513741
LOC100216001	0.513712
AGBL4	0.513679
FIBCD1	0.51251
SEMA3D	0.512152
CCDC64	0.511335
MRPS12	0.511168
SMAD3	0.510948
MARS	0.510624
IRS2	0.510541
IMPDH1	0.510536
WBSCR28	0.510321
TMEM14A	0.509537
SOHLH2	0.50933
BLVRB	0.509053
PSMD2	0.508909
CCDC51	0.508773
TM4SF1	0.508451
SPC24	0.507959
HMGA2	0.507536
HTATIP2	0.507527
LSG1	0.50733
DHCR7	0.505403
ALKBH3	0.505318
UBE2MP1	0.504908
NEUROD2	0.504791
PRR5	0.504347
FOXRED2	0.504163
CNNM1	0.503558
SFTPD	0.503068
ADAD2	0.502969
MCM5	0.502929
CCL20	0.502865
NOTCH3	0.502838
EPN3	0.502713
HEPHL1	0.50262
SIX4	0.502458
GRLF1	0.502245
GAMT	0.501304
IGLON5	0.501217
RPS7	0.501199
NUDT19	0.500792
NIT2	0.500649
KRT84	0.500559
ZNF703	0.500159
DACH1	0.500136
KRT23	0.500065
ALOX12P2	0.49949
GRWD1	0.499462
GIT1	0.499109
MGC70857	0.498914
CDK4	0.498832
GLTP	0.498685
FOLR3	0.498657
NGFRAP1	0.498088
NUMBL	0.497979
AKR1D1	0.497289
REEP4	0.497205
EPR1	0.497142
BTBD11	0.497127
IGSF9	0.49651
COL24A1	0.496476
NMNAT3	0.496341
MPPED2	0.496339
GUCY2D	0.496272
SKP2	0.496084
EIF3C	0.495938
BZW2	0.495913
UPP1	0.495739
KLK5	0.495696
INHBB	0.49526
RPL13AP3	0.494786
CYP2F1	0.494683
SLC22A25	0.494083
MACROD1	0.493912
RTDR1	0.493568
C18orf16	0.493369
TBX18	0.493368
XRCC2	0.492849
MTSS1	0.49275
RANBP1	0.492691
C9orf122	0.492176
RPS11	0.492169
NLE1	0.492057
RARG	0.491959
TRIP6	0.491852
RPL26	0.491719
LOC84931	0.491306
JPH1	0.491303
C22orf23	0.490737
CELF5	0.490701
MTX1	0.490653
PLA2G4A	0.490631
RASL10B	0.490314
C1orf61	0.490304
ZBED2	0.490037
CPA4	0.489719
AP2S1	0.489558
SAE1	0.489273
LOC100128675	0.489247
GJB2	0.488695
KCNMB2	0.488297
TMEM37	0.488262
KLK6	0.488201
IL20RA	0.487411
IGFBP1	0.487122
MRPS2	0.487075
CTU1	0.486924
CCDC106	0.486871
WNT2B	0.486833
AKR1CL1	0.486821
44818	0.485334
CAPN1	0.485214
MKI67IP	0.485208
PRRG4	0.485172
LRP4	0.484464
EFNA3	0.484087
C1orf57	0.483696
FEZF1	0.483354
BAG3	0.483352
ATRN	0.483279
FJX1	0.483258
AQP3	0.48313
TIMM50	0.483118
CT45A4	0.48269
MRPL3	0.482315
IRX3	0.482022
DSC2	0.481909
ABCF2	0.481855
MFSD2B	0.481747
LOC388588	0.481672
ABHD4	0.481485
SLC16A13	0.48112
CCBL1	0.480936
ARHGAP23	0.480887
INHA	0.48077
TREML4	0.480759
ZNF385A	0.480606
PAPPA2	0.480132
PRDM11	0.479722
MEX3A	0.479656
CNGB3	0.47953
TRIML1	0.47946
C1orf116	0.479458
UBE2M	0.479446
LCN2	0.479439
TCHH	0.47879
CNTNAP5	0.478687
FZD6	0.478437
CDK5RAP2	0.477836
MPP4	0.477471
PCDHA9	0.477407
LOC441089	0.477284
ZFP64	0.477191
EPHA4	0.476844
BCL7A	0.47636
C9orf140	0.476318
KHK	0.476112
LRFN4	0.475421
ZFP92	0.475247
DYRK1B	0.474724
FOXP2	0.474441
CHST7	0.474369
MAP6D1	0.47391
MTHFD1L	0.47373
RPL22L1	0.473597
DCAF4L2	0.473564
TBRG4	0.473538
EPT1	0.472995
RASD1	0.472621
FKBP6	0.472423
RDH12	0.472273
DLGAP1	0.471723
CCNE1	0.471633
TUBA3C	0.471371
KCNJ14	0.470888
MBOAT2	0.470822
CLCN2	0.470783
TPI1P2	0.470715
CP	0.470597
RPL35A	0.470166
SEMA4A	0.469898
DYSFIP1	0.469775
OPLAH	0.469468
IGFBPL1	0.469218
RAB3D	0.469149
SCPEP1	0.468934
PSIMCT-1	0.467946
NME4	0.467799
DEFB126	0.467177
APOBEC3B	0.467158
KCNJ15	0.467067
CTAGE4	0.466914
EDAR	0.466769
MLF1	0.46626
SERPINB12	0.465988
PSPH	0.465581
CCDC58	0.465149
CAMKK1	0.46511
C10orf91	0.464774
PDCD2L	0.464666
B3GALT1	0.464392
CENPM	0.464376
DHX34	0.464031
DDR1	0.463882
SHF	0.463695
MUC4	0.463512
JAKMIP2	0.463286
FAM129B	0.463268
RPRM	0.463168
CDSN	0.46306
ETV5	0.462907
ATP6V0E2	0.462759
C17orf82	0.460966
HOXA10	0.460593
RPL24	0.460239
C9orf43	0.459981
PRNP	0.459904
CD9	0.459569
SYN2	0.459411
MRPL12	0.459397
C18orf10	0.459194
EIF4G1	0.459134
VPS37D	0.458936
SIGMAR1	0.458918
JUB	0.458808
EIF3B	0.458804
LOC153328	0.458661
YWHAG	0.458446
STRN4	0.458405
EVPL	0.458316
DDX4	0.458194
ILF2	0.458072
NT5M	0.457955
TMEM184A	0.457568
RBM19	0.457415
CHCHD6	0.457407
EFNB3	0.456949
SYNGR1	0.456765
EIF3K	0.456687
TNNI3	0.456247
AHR	0.45622
NUDT1	0.456176
TARS	0.455448
LOC100130691	0.45526
ADAM17	0.455047
RPLP0	0.454962
NOB1	0.454614
FAM189B	0.454574
MUM1L1	0.453451
CDT1	0.453398
ZDHHC2	0.452895
FAM117B	0.452462
B3GNT7	0.452403
GLTSCR2	0.452349
PAGE2B	0.45225
TMEM177	0.452212
STOML2	0.452057
PFKM	0.451877
BASP1	0.451441
PSMD8	0.451434
FLG	0.451103
GAPDH	0.450941
LOC646214	0.450244
PHLDB3	0.450236
DYNC1I1	0.449601
NRN1	0.449565
CSMD1	0.449515
CSAG1	0.449498
RASSF10	0.449431
FLAD1	0.449414
PRR18	0.448777
CCNB1IP1	0.44798
CLNS1A	0.447601
CPA6	0.447146
LAMC3	0.446794
RPS27	0.446755
NOL6	0.446631
FAM128B	0.446057
PLD6	0.445763
NCAPG2	0.445702
DCAF12L2	0.445547
RFC4	0.445357
CEACAM19	0.445265
EDN2	0.444694
RPL13AP17	0.444563
UBE3C	0.444466
C17orf96	0.444388
GAA	0.444262
FADS2	0.444033
ERF	0.443998
RHBDL3	0.443881
HDDC2	0.443845
FBXO45	0.443448
APOA2	0.44333
PRDX6	0.4428
KIAA0564	0.442765
DGKH	0.442637
AKT1S1	0.442456
ATP5G3	0.441633
CCDC86	0.441621
RPS6KA6	0.44128
SSX1	0.441252
GNA15	0.440956
MYBBP1A	0.440945
SCNN1A	0.440497
IL1RAP	0.440094
RPL7A	0.439943
GTF2IRD1	0.439741
CORO2A	0.439732
PPPDE2	0.439719
STK31	0.439428
HOXC12	0.439334
RPS10	0.439119
FZD9	0.438659
GGT6	0.438562
ZDHHC4	0.438373
SLC15A2	0.4382
NPL	0.437992
TRMT12	0.437915
C3orf26	0.437914
GINS3	0.437599
C11orf82	0.437088
PHLDB2	0.436772
ATP1A3	0.436387
NRXN2	0.436211
BCL2L12	0.4361
ROS1	0.436081
SNX12	0.435953
DEFB103B	0.435945
ADSL	0.435794
DOLPP1	0.435598
SFXN1	0.435427
ANAPC1	0.435421
C1QBP	0.435383
CRMP1	0.435268
PLAGL2	0.434937
BICD2	0.434719
ILVBL	0.434424
ALDH16A1	0.434276
EIF3L	0.43392
CHRM5	0.433832
NAA20	0.433767
PIGX	0.433611
ARHGEF19	0.433546
SAGE1	0.433157
CLCA3P	0.433129
AIFM2	0.433022
FSTL5	0.432837
BID	0.432591
CELSR2	0.432285
DSPP	0.432011
TRIM49	0.43198
TMEM105	0.431971
ARMCX6	0.431736
RXRA	0.43163
NUP205	0.431194
CENPP	0.43113
AQP10	0.430823
GOT1	0.430681
AVPI1	0.430075
LOC254559	0.430052
PPP5C	0.429523
DHRS13	0.429023
MYADML	0.428984
TH1L	0.428685
PSMB5	0.428639
RPL35	0.42815
POPDC3	0.428103
OLA1	0.428052
CDK5	0.427462
LTB4R	0.427374
MARS2	0.427351
C1orf125	0.426806
CSDAP1	0.426688
XKR5	0.42625
NEDD4L	0.426136
C21orf63	0.42546
RFPL1S	0.425278
MYH4	0.425261
MSX1	0.425077
FAM157B	0.424826
KATNB1	0.424731
NEIL3	0.424645
CECR5	0.424623
RPLP1	0.424112
PLTP	0.424105
ZNF581	0.423912
GLUD1	0.423794
C10orf82	0.423281
MAGEA12	0.423273
TOPBP1	0.423008
HSD3B1	0.422727
PLXNA1	0.4227
EFNB1	0.422658
C10orf62	0.422426
NME2	0.422334
ATP1A1	0.422005
OR9A4	0.421905
DCXR	0.42149
CIRH1A	0.421307
TSPAN18	0.420974
ORC1L	0.420925
RPS17	0.420851
LTB4R2	0.420721
CEACAM22P	0.420219
SH3BP1	0.420019
RPL37	0.419802
ZNF530	0.419327
IRX5	0.419228
TPTE	0.418962
DDX39	0.418887
DVL3	0.418841
RPL17	0.418737
ACTR3B	0.418711
FAM83B	0.418648
DSCR8	0.418635
ABHD1	0.418508
CHRNB2	0.418178
CAD	0.417697
SLC2A12	0.417679
H1FX	0.41766
PARL	0.417332
RPS21	0.417322
KIAA1467	0.416493
C10orf58	0.416318
RPL12	0.415966
RAET1G	0.415852
UGDH	0.415821
TRIP13	0.415787
C9orf23	0.415773
SREBF1	0.415662
POLR1E	0.415495
RRP12	0.415296
TMCC2	0.41525
SOX5	0.414991
SLC13A4	0.414651
TFB2M	0.414512
LY6K	0.414488
KRT80	0.414326
KLHL31	0.414236
PCDH15	0.414059
GDA	0.413893
TMEM158	0.413862
FASN	0.413826
RPS18	0.413823
JUP	0.413669
ATIC	0.413392
SERINC5	0.413243
CEACAM6	0.413149
COL17A1	0.413141
TRIM71	0.413041
GABRG2	0.412903
NLGN4X	0.412861
AGK	0.412558
AHCY	0.412492
SDR42E1	0.412269
PPT1	0.412174
ZNF512B	0.411989
DPP7	0.41177
TMEM132B	0.411226
IMP4	0.411182
VANGL2	0.411128
FAH	0.411059
DSP	0.410919
LIG3	0.410787
PES1	0.410745
NHP2	0.410729
GRK7	0.410406
CALCB	0.410363
ATP13A4	0.410323
CALML5	0.410111
LOC400794	0.410104
TOMM22	0.409874
WBSCR27	0.409832
TACC2	0.409814
CYP17A1	0.409653
PLA2R1	0.408835
CCDC21	0.408705
LOC728819	0.408544
RDH10	0.408404
APOA1BP	0.408331
SLC35D3	0.407819
ECH1	0.407318
C3orf37	0.407269
ASPH	0.406514
APBA2	0.406274
SNRPE	0.406228
ZC3HAV1L	0.406076
SENP2	0.405626
44809	0.405346
FLOT2	0.405
MSL3L2	0.404956
RFC2	0.404932
ECSIT	0.404643
RPL13A	0.404631
CARD18	0.404404
EEFSEC	0.40431
POLR1B	0.404234
MAGEA10	0.404155
PAX2	0.403928
MCCC1	0.403738
DSG2	0.403244
TMEM99	0.403233
MRGPRX3	0.403216
PAK4	0.40288
CENPH	0.402661
SCNN1B	0.402566
GSTO1	0.402565
MAGEF1	0.402337
ADIPOR1	0.401684
SNCB	0.401617
OR2A7	0.401558
APOA4	0.401473
TRAP1	0.401277
ARL11	0.401227
UBE2H	0.401002
WIZ	0.400778
RHBDD2	0.400661
C20orf199	0.400535
PGAM5	0.40012
TMEM44	0.400068
NRSN2	0.399956
DDX43	0.399854
FANCG	0.399733
NSUN5	0.399721
LOC91948	0.399632
UNC80	0.399351
TIMP4	0.399245
SEMA4B	0.399229
TMEM41A	0.399096
DHRS4	0.399002
SLC25A10	0.398954
RPS2P32	0.398781
ITGA6	0.398667
KCTD1	0.398475
NCRNA00200	0.398173
ATG4D	0.398169
PTPN14	0.398126
LRP12	0.398116
LPHN3	0.39804
FAM132A	0.398002
C2orf82	0.397956
MED27	0.397934
PSMG3	0.397752
CD109	0.397398
RPAP1	0.396866
NOP56	0.396799
GABRA5	0.3967
KIAA0114	0.39666
LDLRAD1	0.396639
C22orf9	0.396415
ZNF219	0.396313
LRRC8E	0.396215
TMEM132A	0.396137
EPPK1	0.395716
STEAP3	0.395631
FLJ35024	0.395477
MSMB	0.39543
PRDM12	0.395384
CSNK2A1P	0.39538
PCBP3	0.39534
SEPX1	0.394639
B3GNT5	0.39456
PDF	0.394482
FAM9C	0.394444
CXorf57	0.394345
C21orf81	0.394211
C12orf66	0.394174
TRIT1	0.393963
RNF168	0.393885
CEBPG	0.393858
BCL11A	0.393703
WIPI1	0.393562
GSG2	0.393518
ITPKC	0.393322
CREG2	0.393156
FAM9B	0.39308
LOC374491	0.392924
B9D1	0.39286
ACSM2B	0.392748
BAGE2	0.392712
ENDOG	0.392634
LYPD6B	0.392609
PHB2	0.392569
XKR6	0.392491
ANXA2P1	0.392467
CSNK2A2	0.392441
TFAP4	0.392405
GPR85	0.392351
CHRM1	0.392292
PRR23A	0.392232
GCNT2	0.392191
RPL8	0.391741
PPP1R13L	0.391627
MRPS24	0.391459
DTL	0.391424
ZNF282	0.391186
BLOC1S3	0.39117
SMOX	0.391046
SLC10A2	0.390639
H2AFZ	0.390439
LOC647288	0.390387
LOC80054	0.390285
LMNB2	0.390222
ACSM2A	0.390043
ANXA2P2	0.389926
PRSS22	0.389809
MAGED4B	0.389311
DSCR9	0.389295
ITPA	0.38926
EIF4EBP1	0.389208
TOM1L1	0.389188
SLC39A6	0.389176
S100A11	0.389131
F2	0.38911
C19orf24	0.388994
URB2	0.388932
MOCOS	0.388908
KGFLP1	0.388567
TEX15	0.388467
HOMER3	0.387939
C15orf2	0.387863
RPL18A	0.387807
DKC1	0.387595
IRAK1	0.387543
ANKRD35	0.387001
FAM60A	0.386911
ABHD2	0.386768
LIMK1	0.386601
FLJ46321	0.386289
RELL2	0.386172
FUT1	0.38564
RPH3A	0.385419
TPTE2P1	0.385403
EXOSC4	0.385347
TUBA4A	0.384825
HMBS	0.384707
GPD2	0.384517
TMEM147	0.384395
RMRP	0.384283
FAM182A	0.384273
C16orf63	0.384272
AKT2	0.384196
SMCR7L	0.384195
GPR157	0.384118
TMEM185B	0.383945
BDH1	0.383528
NOLC1	0.383368
C21orf90	0.383277
GNB1L	0.38308
FAM184B	0.382938
ANK3	0.382768
INHBC	0.382399
DAK	0.382341
CDC20B	0.382333
HBQ1	0.382019
ABHD12B	0.381982
SUMO1P1	0.381903
CDCA5	0.381855
SCGB3A2	0.381849
C7orf49	0.381781
PIK3R4	0.381659
EPRS	0.381622
SNRPB	0.38162
TMEM84	0.381594
PAICS	0.381581
ARL4A	0.381553
FAM69B	0.381536
NPY	0.381493
GGCT	0.381357
LIG1	0.381211
RPS27A	0.380994
LIPN	0.380818
SORL1	0.380781
SRPRB	0.380752
C20orf3	0.380652
XPO5	0.380652
FUNDC2P2	0.380531
ANKLE1	0.380251
MYPOP	0.380073
SND1	0.380026
LAPTM4B	0.379897
MAGEA11	0.378956
CSE1L	0.378952
HOMER2	0.378808
TMEM109	0.378583
MRPS26	0.378477
SARS2	0.378371
NCAPH	0.378323
DTNB	0.378317
ACE2	0.37812
ATP5G1	0.378015
SLC12A6	0.37758
ARHGAP28	0.37729
TRIM60	0.377063
EEF1G	0.376442
UBXN7	0.376407
ACBD6	0.376133
TRAF7	0.376105
IARS	0.376085
FANCI	0.376054
DCUN1D5	0.376007
CYP4F12	0.375755
PCCB	0.375691
SHISA4	0.375678
MLC1	0.375644
TPST1	0.375427
NLRP7	0.375274
ADCK4	0.375254
HRK	0.375073
FSD1	0.374978
RPS15A	0.374852
IRX2	0.374797
FGF23	0.374779
MATN2	0.374427
KRT10	0.374299
TSSC1	0.374187
ZNF324B	0.374012
PNO1	0.374011
RPL28	0.373942
DNAJC19	0.373899
ATXN10	0.373887
NHSL1	0.37341
UBAP1	0.373318
NDRG1	0.373234
UBE2T	0.373205
RPL31	0.373039
SMARCD3	0.372573
PSD3	0.372568
QPCTL	0.372383
RBPJL	0.37234
DHODH	0.372236
GTF3C5	0.371838
THOC4	0.371757
ETV3L	0.371701
CLN6	0.371585
IGDCC3	0.371528
TFCP2L1	0.371478
PVT1	0.371373
FAM64A	0.371341
NDUFB9	0.371293
LSM7	0.371279
REN	0.370868
ABCF3	0.370762
RTP1	0.370733
RPL13AP6	0.370551
DIP2B	0.370458
CBX6	0.370142
AP2M1	0.370074
RFPL1	0.370063
TMC4	0.37004
C15orf63	0.369848
MRPS33	0.369807
PPM1G	0.369791
MSH6	0.369404
ZNF773	0.369348
ATF4	0.3692
IL1R2	0.369089
NCBP2	0.368956
C20orf151	0.368953
SENP3	0.368943
C4orf35	0.368935
BFSP1	0.36893
DST	0.368892
TOMM20	0.368546
RPL4	0.368546
MCHR1	0.368464
ATP5SL	0.368464
H2AFY2	0.368382
TCTEX1D2	0.368293
MTHFD2	0.368178
CD3EAP	0.368143
KCNC3	0.368081
USP10	0.367918
RRM1	0.367781
C7orf11	0.367716
BCAR3	0.367579
IL1RL2	0.367524
ZNF574	0.367489
SNAPC5	0.367304
HSPA4L	0.367171
ASS1	0.367078
ST3GAL3	0.367037
RPL23P8	0.366974
DBN1	0.366927
UNG	0.366884
JAG1	0.366813
SLC25A5	0.366773
COX5A	0.366521
CBX4	0.366353
DYDC2	0.366188
KIAA0664	0.36612
OBSL1	0.365681
PUS7	0.365487
MCM8	0.365471
SDK2	0.364926
CARD17	0.364864
SLC27A4	0.364772
LPCAT3	0.364744
FAM128A	0.364653
CDC25A	0.364554
C15orf61	0.364026
NCAPD2	0.363998
ITGB4	0.363886
TUFT1	0.363653
EFTUD2	0.363639
C7orf27	0.363454
RPL37A	0.363437
POU4F1	0.363355
CLPTM1	0.363215
LOC728554	0.363066
DEFA6	0.362895
ZDHHC9	0.36273
DCAF12	0.362719
TNNT3	0.362577
PRPF19	0.362564
MOV10L1	0.362303
CFHR1	0.362078
GLA	0.362026
MRPL24	0.361443
PKN1	0.361384
LOC126536	0.361178
YARS	0.361102
MPST	0.360953
AKR1E2	0.360768
AIMP2	0.360531
BUB1B	0.360514
LIN28B	0.360506
FIBP	0.360325
CDX2	0.360213
NXPH1	0.360003
NXF2B	0.360002
PEG10	0.359936
RPL27	0.359721
SLC7A1	0.359695
BCKDHA	0.359683
RPS2	0.35958
IGSF1	0.359525
LRRTM4	0.359459
LYPD4	0.359395
SULT1A1	0.359161
CLGN	0.35912
LCMT2	0.359087
ESRP1	0.358768
SLC30A8	0.35855
BAGE	0.358356
SETD8	0.358331
RPL23	0.358325
GGT3P	0.358322
TRMT6	0.358296
ZNF280A	0.358041
TK1	0.357999
RAI14	0.357974
SORCS3	0.357706
NDUFB4	0.35766
RPS4X	0.357618
SFTPB	0.357429
LOC100130776	0.357405
RPP25	0.357224
PPP1R14B	0.357219
LPAL2	0.357195
HEPN1	0.357121
ARG1	0.357061
POP1	0.356955
C17orf89	0.356941
C21orf56	0.35678
RAE1	0.356742
HSPE1	0.356598
YEATS2	0.356557
PRMT3	0.356519
SULT1E1	0.356244
WDR53	0.356236
ARMC4	0.356167
FEM1A	0.355997
TSEN34	0.355996
LOC401010	0.35595
EIF2B5	0.355788
SCRIB	0.355697
C4orf39	0.35557
F11R	0.35548
ERCC2	0.355407
PVRL4	0.355385
TMEM79	0.355255
VHLL	0.355243
PTRH1	0.355233
FLJ25363	0.355221
[truncated: 17,057 more rows]

## Sheet: GBM
GeneSymbol	logFC
GSTM1	2.63546
COL6A3	2.5642
DKK1	2.52887
COL1A1	2.26129
COL14A1	2.19334
ALPK2	2.1443
ALOX15B	2.11247
MRC1	2.06135
ADAM6	2.06082
AREG	2.05358
COL1A2	2.04983
TFAP2C	2.01174
COL3A1	1.99174
IL2RA	1.98553
THBS1	1.98343
MME	1.94708
SLC1A5	1.9231
CXCL13	1.90392
SFRP2	1.90223
F13A1	1.86969
MFAP2	1.84468
C10orf81	1.84404
COL15A1	1.84323
NNMT	1.83486
ASAM	1.82102
ROR2	1.81098
POSTN	1.80909
GALNT5	1.80687
COL8A1	1.79165
CD70	1.77915
ALDH1A3	1.74975
LUM	1.7378
CD163	1.73019
CDKN2A	1.69132
HOXB6	1.68639
ADM2	1.68097
COL13A1	1.68028
EREG	1.67592
PCOLCE	1.66362
MMP13	1.64933
SDC1	1.64899
BMP5	1.62346
IL7R	1.61438
CCL18	1.60741
KRT18	1.59605
GZMK	1.59499
HMGA2	1.5911
FCGR2B	1.58117
TMEM150B	1.57508
CD209	1.56166
KRT8	1.55947
IGJ	1.55604
DPT	1.55041
ANPEP	1.54982
COL5A1	1.54337
FAM176A	1.54087
FABP4	1.53294
IGF2BP1	1.52897
CNN2	1.52189
C7	1.51962
BAIAP2L1	1.51744
CLEC10A	1.51152
FBLN1	1.51046
FNDC1	1.49984
SRPX2	1.49673
TNFSF12-TNFSF13	1.49413
GSDMA	1.48493
CD3E	1.4691
FOLR2	1.46273
BNC2	1.4615
CR1	1.44839
ADAMTSL1	1.44685
PODNL1	1.44584
LYVE1	1.44144
STRA6	1.44124
OLFML2B	1.43792
P4HA3	1.43419
COL6A2	1.4267
FPR3	1.4257
FAM20A	1.42302
DOK2	1.41895
CCL13	1.4147
ISLR	1.40641
SLIT3	1.40476
MOCOS	1.40444
IBSP	1.404
CHRNA9	1.40148
C5orf46	1.39957
FST	1.39957
PTGER2	1.39841
TDO2	1.39765
TNFRSF8	1.39705
COL10A1	1.39266
MCTP2	1.39045
PI15	1.39042
CILP2	1.38177
MMP1	1.37996
ACTG2	1.37899
COL11A1	1.37741
FAP	1.37692
MFAP5	1.37013
CA9	1.36972
ARHGEF5	1.36751
CYP1B1	1.36555
IL10	1.35826
CD3D	1.35819
TGFBI	1.35652
KCNN4	1.35547
TMEM200B	1.34876
LRRC15	1.3476
LCK	1.34259
FCN3	1.33944
LAMB1	1.33675
ADAMTS2	1.33491
LBP	1.33451
IL31RA	1.33419
SH2D2A	1.33105
GCNT1	1.32922
GPC3	1.32573
FPR2	1.32553
GZMA	1.32195
LOXL2	1.32185
MMP7	1.31996
TFPI2	1.3196
HLA-DQA2	1.30828
ASGR2	1.30536
MARCO	1.30446
IL6	1.30193
IL21R	1.30097
OSR1	1.29888
CAPN6	1.29886
CCL26	1.29582
ADAMTS12	1.29479
COL12A1	1.29461
STEAP4	1.29239
SSC5D	1.2923
OGN	1.2914
CD2	1.2913
CCL14	1.28989
CD96	1.28739
IL1R2	1.28496
MLPH	1.28321
PRRX2	1.28037
C20orf186	1.27671
FHL2	1.27469
OSM	1.27463
INHBA	1.27317
MXRA5	1.2716
SIGLEC1	1.27105
SLAMF8	1.26994
CCL8	1.26968
FAM23A	1.26705
SLN	1.26312
C5AR1	1.2592
DUSP2	1.25815
INSRR	1.25778
CXCR6	1.25642
PRG4	1.25488
KDELR3	1.25443
ADAMTS14	1.25341
AMICA1	1.25133
FGF5	1.25041
SHISA2	1.24761
RUNX2	1.2443
IL1R1	1.24247
CEACAM4	1.23968
SLC16A10	1.23902
FMO1	1.23737
RFX8	1.23537
DIO3	1.23342
PSTPIP2	1.23267
CTHRC1	1.23062
STC1	1.22902
LILRB5	1.22696
MS4A4A	1.22615
MMP11	1.22524
CAMP	1.22444
JAK3	1.22229
B4GALT1	1.22228
EGR2	1.22113
VDR	1.21598
SLPI	1.21482
CCR2	1.2148
TWIST2	1.21469
TRPV4	1.21281
HLA-DRB5	1.2126
SKAP1	1.21186
DUSP1	1.21075
LTBP2	1.21041
PRF1	1.20982
MMP3	1.20972
TREM1	1.20893
CCL4	1.20701
HLA-DQA1	1.20672
AIM1	1.20532
PTGFR	1.20234
TPBG	1.20149
SPINT1	1.19604
SERPINE1	1.19352
CDCP1	1.19001
TLR8	1.18904
MYO5B	1.18717
LOC647121	1.18622
HLA-DQB1	1.18306
GRAP2	1.18237
ECHDC3	1.1816
CCL4L2	1.17962
ST14	1.17938
MMP9	1.17872
SLAMF6	1.17637
SPHK1	1.17544
PLEKHG4	1.17531
CMKLR1	1.17347
EBF2	1.16837
EMR1	1.16743
TEC	1.16674
CRABP2	1.16545
CXCL6	1.16515
PDCD1	1.16475
GLIS1	1.16372
LILRA5	1.16342
TACR1	1.1631
PAPPA	1.16197
RHOH	1.15988
IL2RB	1.15688
EOMES	1.15627
EPHA3	1.1557
FAM177B	1.15442
P4HA2	1.15422
IL1RN	1.15284
UBASH3A	1.14519
WISP1	1.14435
PLAUR	1.14261
SLC10A6	1.14188
SVEP1	1.14129
HTR2B	1.13927
ADAMTS15	1.13887
COL8A2	1.13687
TIMD4	1.13472
CXCL12	1.13086
PLBD1	1.12958
SEMA3C	1.12894
CMTM7	1.1286
LY96	1.12844
HOXB5	1.12582
THBD	1.12511
GBP5	1.12486
DKK2	1.12425
TACSTD2	1.12364
IGFBP6	1.12358
CD28	1.12331
CCL3	1.12311
CTLA4	1.12097
CLDN23	1.12024
SAA2	1.11776
MAFB	1.11413
TNNT1	1.114
PRLR	1.11336
KLRB1	1.11292
KLHDC7B	1.11209
CRTAM	1.11045
P2RY8	1.10894
ELF4	1.10865
CATSPER1	1.10705
CD36	1.10606
SERPINF1	1.10496
DLK1	1.10433
PVRL4	1.10213
ASS1	1.09797
HLA-DRB1	1.09793
DSC2	1.09785
KCNE1	1.09784
CD72	1.09783
CFD	1.09769
UCN2	1.09471
IDO1	1.09463
COL7A1	1.09393
TMEM200A	1.09118
CXCR3	1.08753
PMAIP1	1.08663
HLA-DRB6	1.08627
RAB11FIP1	1.08619
CNFN	1.08526
LILRB2	1.08365
SNAI1	1.08329
HGF	1.08239
CYR61	1.08164
FCGR2A	1.0812
COL5A2	1.07849
ACPP	1.07834
C1QA	1.07796
CD5	1.07617
CTSC	1.07522
CXCR4	1.07444
NRP1	1.07234
TCHH	1.07153
ACP5	1.07116
TRPM8	1.07097
KYNU	1.07022
HK3	1.06948
BATF	1.06841
GPNMB	1.06811
CD3G	1.06756
IL10RA	1.06745
PYHIN1	1.06607
EGFL6	1.06604
NLRP12	1.06524
CCL20	1.06463
FCGR2C	1.06452
SAMD3	1.06326
TNFAIP8	1.06247
SIT1	1.06218
LOX	1.06189
KRT19	1.06104
BICC1	1.05958
SNAI2	1.05931
C6orf176	1.0566
RGS2	1.05636
INSC	1.0551
GFPT2	1.05449
P2RY10	1.05443
EMB	1.05421
SOCS3	1.05389
VSIG4	1.05334
HBA1	1.05238
ABI3BP	1.05097
STAB1	1.0503
C19orf59	1.04634
PTGER4	1.04578
GATA6	1.04473
FBLIM1	1.04393
MEOX1	1.04237
FPR1	1.03914
EMILIN1	1.03843
CTSW	1.03828
CCR7	1.0378
OSR2	1.03738
SVIL	1.0364
CCR4	1.03622
TNFRSF10A	1.03545
BDKRB2	1.03317
PTGS2	1.0326
CD109	1.03193
BTBD11	1.03124
SRPX	1.03094
CDKN2B	1.03058
PI3	1.03027
MS4A7	1.03003
VEGFC	1.02949
RAB38	1.02875
DCN	1.02866
EPYC	1.02789
ITGA9	1.02712
SERPINA1	1.02621
FBN1	1.02614
COL18A1	1.02514
AQP9	1.02404
KCNJ15	1.02226
CASS4	1.02146
S100A4	1.01965
BPI	1.01907
LILRA6	1.0185
TRIM48	1.01778
FBN2	1.01658
PDIA5	1.01588
ASPN	1.01516
VENTX	1.01323
ITGA4	1.01262
CLCA2	1.01229
RCN3	1.01201
MIPOL1	1.01156
PLA2R1	1.0105
LRG1	1.01014
SCNN1A	1.01008
CCL3L1	1.00974
HLA-DQB2	1.00904
ADAMTS4	1.00829
LOXL1	1.0049
KCNK15	1.00462
TBC1D8B	1.00422
IER3	1.00387
FAM46B	1.0034
BDKRB1	1.00254
LILRB3	1.00132
C13orf33	1.00014
CELSR1	0.999941
TNFSF4	0.999876
ICOS	0.999412
GPR132	0.999123
PTPN22	0.998266
CSTA	0.997332
NPB	0.997224
COMP	0.996531
CD14	0.996405
SLC16A3	0.99619
TMED7-TICAM2	0.995638
C1orf38	0.989644
MST4	0.989312
PTGES	0.989123
RAB27A	0.988288
SLA2	0.987144
GABRR1	0.986355
MMP10	0.986265
SAA1	0.986095
CTSH	0.986019
HOXB9	0.986015
FOSB	0.985904
MX2	0.985542
PLIN2	0.985338
GPR183	0.98501
SUSD2	0.984349
ITPR3	0.983258
SCNN1B	0.982566
FAM83H	0.981918
TYMP	0.98174
ANO9	0.981356
MAP3K8	0.981261
DCBLD2	0.979628
OR2A7	0.978765
JUNB	0.978231
RGS1	0.978032
HTRA4	0.977638
PPAP2C	0.97688
INHBE	0.974965
DOCK5	0.974009
CD48	0.972141
KMO	0.971879
CEBPB	0.970301
LYZ	0.970173
CST7	0.968636
C1R	0.968179
PLEKHN1	0.968093
COLEC12	0.967665
C1QB	0.96668
LTF	0.965754
MYO1G	0.964806
ADAM8	0.963846
VNN1	0.963438
MRGPRF	0.962608
TIMP1	0.962459
CPA3	0.962251
ZCCHC5	0.962025
IL2RG	0.960951
FAM26F	0.96076
FCGBP	0.958275
SFRP1	0.956845
OBFC2A	0.95582
LIF	0.955373
INSL3	0.953368
ITGA11	0.953287
JPH1	0.951928
PPBP	0.951716
PLP2	0.950083
POPDC3	0.949818
MAN1A1	0.949381
DPP4	0.948495
TPM2	0.948022
C2orf89	0.947906
MMP14	0.945448
GZMH	0.945271
C1QC	0.944274
SHC1	0.943773
NTRK1	0.943234
MYOF	0.943072
CP	0.942246
PPEF1	0.941208
MS4A6A	0.940849
CCL5	0.940305
IFI30	0.939187
MCOLN3	0.936341
FXYD5	0.935906
DAB2	0.93584
C4BPA	0.934593
ARPC1B	0.934115
BARX1	0.933415
FAM129A	0.932927
ASB9	0.931593
SFN	0.931532
HAS1	0.931497
LGALS12	0.931491
LYPD3	0.931201
CLIC6	0.929852
SGCD	0.929557
CD6	0.929462
MFSD7	0.928704
TNFSF9	0.928695
RNF149	0.92824
KCNK6	0.927892
HCLS1	0.927576
CD27	0.926948
MPEG1	0.926503
IL24	0.92547
RAC2	0.925361
LGALS1	0.92495
S100A9	0.924302
IGFBP4	0.924241
PRR16	0.924071
RNASE1	0.921705
MAPK13	0.920428
SDK1	0.919861
GXYLT2	0.919725
SIGLEC7	0.917451
HSPA7	0.917406
COL29A1	0.914258
CD8A	0.914037
GZMB	0.913265
KLRD1	0.911826
C2	0.910462
SIRPG	0.908581
SERPINA5	0.908311
SLA	0.908082
EMR2	0.907208
GPRC5A	0.906448
GPX8	0.905579
TNFRSF11A	0.904338
ARHGEF35	0.903931
MSR1	0.903869
DPYD	0.90318
SERINC2	0.902059
CCL3L3	0.900811
IL18R1	0.900759
MIA	0.898674
DSE	0.897875
VLDLR	0.897626
SULT1B1	0.89752
PF4	0.897207
B3GNT8	0.894273
SAMD11	0.894032
FLJ36031	0.893569
HLA-DRA	0.893543
TNFRSF9	0.893424
ADAM12	0.893374
PLAU	0.892515
CLEC4E	0.892497
CLIC3	0.892327
CD68	0.890963
ZNF385D	0.890332
PDK4	0.889413
FAM83G	0.888799
C1orf162	0.888613
IGF1	0.888564
PRAME	0.888509
CLCF1	0.888357
SELP	0.888315
CHST13	0.888044
C1S	0.887504
AHNAK2	0.887354
ATP8B1	0.887023
ST6GALNAC2	0.886484
SPON2	0.885913
AIM2	0.885792
NFAM1	0.884709
RNASE2	0.88453
OMD	0.883858
FZD7	0.883702
TNFSF11	0.880889
HSPG2	0.880747
GPR77	0.880381
MET	0.879813
CLEC4D	0.879576
EMILIN2	0.878504
AOAH	0.877853
HHIPL2	0.876694
SLC11A1	0.876246
ZNF683	0.876131
TRH	0.875094
ANXA13	0.874999
CD200R1	0.874422
BCL3	0.874282
RIPK4	0.874194
SLC17A9	0.873257
FCRL6	0.872282
CACNA2D4	0.87209
PRSS23	0.871835
CDC42EP5	0.871418
MGC29506	0.87126
NKG7	0.871004
GNA15	0.870209
TBX21	0.870141
ATF5	0.869834
CEACAM1	0.868512
PTGER1	0.868133
HAS2	0.867933
CTAGE9	0.867917
CSF3	0.867589
LCP1	0.866202
FCN1	0.865617
FBLN2	0.86555
MYL9	0.865109
SELE	0.863818
S1PR4	0.86341
TREML2	0.862381
CPZ	0.862223
LTB	0.861829
SMAGP	0.859566
LAIR1	0.859531
CEACAM21	0.859007
CMTM8	0.857393
HLA-DOA	0.857214
HLA-DPB1	0.856736
PIK3R5	0.856622
ANGPTL4	0.855582
HBB	0.855391
A4GALT	0.854883
S100A11	0.854575
ATP2A3	0.854488
EGFLAM	0.853678
AMIGO2	0.853603
APCDD1L	0.853197
XCL2	0.852329
RUNX3	0.851984
CD300LB	0.850911
TNFRSF1B	0.850737
CFI	0.850697
TLR2	0.850528
FN1	0.849907
EXOC3L2	0.848236
VSTM1	0.847256
GPR141	0.846999
LRRC25	0.846414
LGALS7B	0.846014
CD52	0.845516
RARRES1	0.845297
ALAS2	0.844763
CALCR	0.843827
COL6A1	0.843318
CLEC12A	0.842847
ADRA2B	0.842701
SAA4	0.842213
SRGN	0.841276
IL4R	0.840681
LRRC8E	0.839996
PTPRU	0.838872
SMC1B	0.838698
PROS1	0.837844
IGF2	0.837714
CRIP1	0.836927
PRRG4	0.836814
GLT8D2	0.836732
GLIPR1	0.836438
C9orf167	0.83604
SLC9A4	0.833629
MAN2B1	0.83351
BFSP1	0.833332
CAV1	0.832882
RMRP	0.832522
WNT2	0.831785
KRT16	0.831736
LEPREL2	0.831626
ITGA5	0.830796
CSF2RB	0.830058
CD74	0.830039
C6	0.829736
STARD5	0.829591
FLT3	0.829109
CYP26A1	0.828365
ADAMDEC1	0.828102
FOXD2	0.827488
STAT6	0.827118
TGFBR2	0.827085
PLVAP	0.826898
FOS	0.826744
MXRA8	0.826557
A2M	0.826127
RETN	0.825946
SLAMF1	0.825335
SIGLEC9	0.825309
NCF4	0.824782
FOXC2	0.824543
RIBC2	0.823296
STX11	0.822844
CCL11	0.822564
DDR2	0.8216
GPR171	0.820887
CH25H	0.820562
MALL	0.820056
DNAJC5B	0.819591
ROR1	0.818783
TNFRSF18	0.818436
SLAMF7	0.818423
FCGR3A	0.818204
MGP	0.81813
HBA2	0.818031
CD300E	0.817797
HIST1H2BK	0.815906
SIGLEC12	0.815207
RPSAP52	0.813906
TES	0.813323
BST1	0.813279
PRICKLE1	0.812893
HGD	0.812061
FAM167B	0.811751
CHI3L1	0.811101
FZD1	0.810844
GBGT1	0.810314
GATA3	0.80805
OASL	0.807672
NLRC4	0.806606
C3orf52	0.806296
CLEC2B	0.806032
CBLC	0.805862
LDLRAD2	0.805688
GIPC2	0.805592
SLAMF9	0.804977
HRH2	0.803206
CD1D	0.802224
CD8B	0.802081
CSF1R	0.801813
METRNL	0.801558
CCL2	0.801375
XKRX	0.800369
CYP2S1	0.798808
KRT80	0.79862
MSC	0.798393
RNF144B	0.798271
TYROBP	0.798136
ACSL1	0.796681
HTRA3	0.795784
KERA	0.79541
LEPRE1	0.795235
SAT1	0.794893
SELL	0.79463
BCL2A1	0.794575
ACAP1	0.794337
SLC20A1	0.794095
LTBP4	0.793437
LZTS1	0.793131
CDA	0.793092
IRF4	0.792802
UGT3A2	0.791585
PKP2	0.791137
RNASE6	0.790978
GCHFR	0.790964
CST6	0.790905
LTBR	0.789408
TMEM173	0.78878
SIX2	0.78875
HS3ST3A1	0.788683
SH3TC1	0.788557
FCAR	0.788191
CD1C	0.787206
HLA-DMA	0.787152
GPR84	0.787121
CORO2A	0.786538
MVP	0.786427
FKBP5	0.786093
CXCL5	0.785883
LOXL4	0.785619
ARHGAP24	0.78556
OLFML3	0.785488
MAN2A1	0.785318
PLB1	0.785227
C10orf125	0.785156
HTR1D	0.784851
NBL1	0.784604
HSPA6	0.782623
AQP3	0.782457
SPIB	0.782237
APOBEC3F	0.78161
REM1	0.780658
STXBP2	0.780387
POU2F3	0.780032
ECM1	0.779944
S100A8	0.779834
CYP26B1	0.779705
LAYN	0.779404
TNNI2	0.779243
HPSE	0.778142
CCL22	0.778083
SDC2	0.77808
LTC4S	0.778008
TSLP	0.777939
RNASE3	0.777595
TLR5	0.776227
VAMP8	0.77621
RPLP0P2	0.776207
CRISPLD2	0.77514
TNFSF10	0.77501
CD33	0.774205
DUSP23	0.773789
ICAM4	0.773388
KLF5	0.773136
NPC2	0.773012
MFI2	0.772667
LOC100271831	0.772268
BGN	0.771641
MBOAT1	0.771629
RUNX1	0.771533
NLRP6	0.770959
FRRS1	0.770164
HP	0.770144
C7orf58	0.769915
IL11	0.769729
ELOVL3	0.769192
DUOXA1	0.768112
ITGB2	0.767652
LY9	0.766909
PHLDB2	0.765885
ANXA2	0.765726
SLC16A5	0.765715
GSDMC	0.765154
OSCAR	0.764633
SIK1	0.763097
ESR2	0.76284
NXF3	0.761832
HAMP	0.761722
TMEM171	0.760738
TEAD2	0.760528
GYPC	0.760242
EPB41L3	0.759844
IL4I1	0.759774
FLJ45983	0.75964
PLA2G2A	0.759343
AIF1	0.757558
SYTL1	0.756846
ADAMTS16	0.756303
RHOD	0.75627
ZFP36	0.756207
SPOCD1	0.756059
LRRC3	0.755881
IMPA2	0.755599
MYH9	0.755421
RAB32	0.75505
PRSS35	0.755012
VMO1	0.754288
GPR124	0.754229
SIGLEC10	0.754037
MYO3A	0.753759
CD1E	0.752574
PCK2	0.75203
DDIT4	0.751873
CTSS	0.751654
MNDA	0.751504
PTPLAD2	0.751387
AKR1B10	0.751239
GIMAP5	0.750464
STAC	0.750072
TMEM119	0.749507
CRYBB1	0.749277
COL24A1	0.749055
LAMP3	0.749053
MIF	0.7485
NDN	0.748069
CKM	0.74779
SLC5A3	0.747556
TUSC3	0.747393
LILRA3	0.74729
TMEM26	0.746922
psiTPTE22	0.746899
ITGB5	0.746603
MTHFD2	0.746581
SLC38A4	0.746272
HLA-DMB	0.746214
CTSB	0.745651
VNN2	0.745643
HAS3	0.744819
FAM46C	0.744545
COPZ2	0.744502
PYCARD	0.744405
LAPTM5	0.744385
GJB2	0.744087
AGPAT9	0.743798
ADAMTS1	0.742063
TBXAS1	0.74183
IL1RL2	0.741599
TGFB1	0.741482
PHLDA2	0.741217
CPVL	0.740302
CTSZ	0.739659
TBC1D10C	0.739531
CACNA2D1	0.739186
ESM1	0.739092
LRRC33	0.738896
CCL7	0.738841
ARHGAP10	0.738296
RGS18	0.737384
FAM129B	0.737014
GDF15	0.73683
STEAP1	0.73622
CTAGE4	0.736024
EBI3	0.735474
HLX	0.734344
MGC12982	0.734332
MYLIP	0.733435
IL12RB1	0.733282
SELM	0.732651
GPR65	0.732523
MS4A14	0.732431
FMNL1	0.73166
ARSI	0.730561
C3AR1	0.729766
ANXA2P2	0.729677
CD93	0.729621
DEF6	0.728852
ORM1	0.728403
SLC7A8	0.728291
ZBTB7C	0.72825
CD1A	0.7282
CD40	0.727223
LEP	0.727217
CD163L1	0.726805
PLAC1	0.726665
XBP1	0.72624
TMTC1	0.72602
IL27	0.725777
TBXA2R	0.725029
HLA-DPA1	0.724297
SEMA3F	0.723691
FAM26E	0.722888
ARHGEF19	0.722743
FCER1G	0.722419
FAM38B	0.722171
C3orf67	0.721757
FKBP11	0.721396
AOC3	0.721291
PLN	0.721283
FERMT3	0.721175
SERPING1	0.721057
SLC25A24	0.720513
CSDA	0.720487
ABCA6	0.720209
WDR69	0.720052
APOBEC3B	0.719949
FAM92B	0.719595
SERPINH1	0.717479
MTMR8	0.71725
CNN1	0.717099
GPSM3	0.716351
DKKL1	0.716263
MTL5	0.716172
TLL1	0.715919
RANBP17	0.715748
ODF3B	0.715429
TBC1D8	0.715414
CHRDL2	0.715258
IRAK3	0.715021
KANK4	0.714971
XCL1	0.714854
FGF18	0.714832
ACTN1	0.714506
GPR18	0.714467
FOSL2	0.714213
CHIT1	0.713797
GLT25D1	0.713578
BACE2	0.713397
CHSY3	0.713044
MRC2	0.712782
WBSCR28	0.712398
LAX1	0.712232
HES2	0.711799
CXorf21	0.711438
CYTIP	0.711165
EIF4EBP1	0.711072
GFI1	0.710873
C17orf87	0.710838
KCNG1	0.710753
CD7	0.710613
OR51E1	0.710547
FBP1	0.710358
ALOX5	0.710246
RIN3	0.709295
BMF	0.709118
ITK	0.708963
PAPSS2	0.708786
SOD3	0.708013
CCL17	0.707849
CYP4F22	0.707587
PRR24	0.707539
C9orf44	0.707133
TNFSF8	0.707121
ITGB1	0.706958
TTC39B	0.706721
C11orf75	0.706089
CD4	0.705896
LCN2	0.70538
PDK3	0.704967
PSTPIP1	0.704359
CLDN7	0.702859
TCIRG1	0.702548
NR4A2	0.702416
WNT5B	0.702311
OAF	0.701175
ZC3H12A	0.700435
FTL	0.700229
GPR39	0.700167
FMN1	0.699664
NR0B1	0.699657
HIST1H1C	0.698811
DSG2	0.698686
ITGB3	0.698376
CD44	0.698281
RND3	0.697825
GDF6	0.697717
FLNA	0.697257
RAB3IL1	0.697125
BCL2L12	0.697077
ENTHD1	0.696861
ITGA8	0.696583
CXCL9	0.69622
SLC39A4	0.696044
ACSM3	0.695966
SHB	0.695964
MYADM	0.695646
RASSF9	0.695515
APOBEC3C	0.695357
FCER1A	0.695324
CA12	0.694734
PITX1	0.694695
IL22RA1	0.694588
ZP1	0.694354
ANKRD34B	0.693269
TSPO	0.693151
MAN1C1	0.692392
FGL2	0.692269
APOBEC3A	0.691953
LAMC2	0.691936
KLHL6	0.691562
CD86	0.690888
HCK	0.690696
CD177	0.690606
MYL12A	0.690575
ICAM1	0.690127
ERRFI1	0.689759
RBM47	0.689608
HIST2H2AA3	0.689367
FBXO32	0.688685
MOXD1	0.687956
CTSL2	0.687698
CCDC129	0.687252
SBSN	0.68702
DNASE1L1	0.686596
AKR1E2	0.686324
FAM46A	0.686137
SMOC2	0.685938
GCH1	0.685709
APOBEC3D	0.685304
GRN	0.685003
PLOD1	0.684889
MYLK	0.684802
ITPRIP	0.684665
SIM1	0.683801
IRX1	0.68328
PLA1A	0.682834
CALHM2	0.682528
ZNF185	0.681693
CD248	0.681648
IL17B	0.681374
ST3GAL1	0.679928
RAET1G	0.678433
CISH	0.677892
FER1L4	0.677064
GCET2	0.676984
SLC10A3	0.676918
EHBP1L1	0.676587
DPYS	0.676246
RHBDF2	0.675647
PLXND1	0.675619
FAM176B	0.67557
ARHGAP30	0.67515
DOCK2	0.675045
CFB	0.674758
GJA5	0.674683
TXK	0.674537
ANXA8	0.674433
TMEM45A	0.674368
AGPAT2	0.674258
FLG	0.674186
C15orf48	0.674149
PIK3AP1	0.673899
TPRG1	0.673604
TMEM106A	0.673547
DENND1C	0.67342
IKZF3	0.673147
RCVRN	0.672165
DGAT2	0.672119
ADRA2A	0.672095
ARL11	0.672008
DYSF	0.671459
CD300C	0.671259
KREMEN1	0.669952
ABCA13	0.66991
SPAG4	0.669289
SECTM1	0.669197
FZD8	0.668786
WAS	0.668596
ACTA2	0.668562
MCOLN2	0.668173
TMEM37	0.667935
CRLF1	0.667334
GPBAR1	0.667268
NID1	0.667226
CLIC2	0.667064
NOD2	0.666936
MGST1	0.666566
SLC7A7	0.665166
PLEKHA4	0.664934
CLEC7A	0.664767
LOC151534	0.664718
NID2	0.664603
CD300A	0.66442
BNC1	0.663581
NOV	0.662437
THNSL2	0.662073
RASGRP4	0.661995
PLXDC2	0.661472
PRKCDBP	0.661335
ID1	0.661217
CYBB	0.661189
GIMAP8	0.660671
ARPM1	0.660486
PYROXD2	0.660451
PTPRH	0.660164
TM4SF19	0.660123
IGF2R	0.659086
C1orf130	0.658093
VAV1	0.65756
TRAT1	0.657496
SPI1	0.657413
MEFV	0.656963
PDE6G	0.656456
IL15	0.655844
ARHGEF16	0.655808
PTPN6	0.65541
CAPS	0.655247
MMP12	0.65465
DMRTA1	0.654473
FOSL1	0.653907
SLC6A6	0.653734
NCKAP1L	0.653533
MBNL3	0.652085
UBXN10	0.652042
RNF217	0.65187
PRDX4	0.651717
NAGA	0.650901
FASLG	0.650524
PLAC9	0.650465
IL15RA	0.650436
PRDM1	0.64981
FLNB	0.649579
ICOSLG	0.649493
TXNDC3	0.649123
MLKL	0.648338
CHEK2	0.648096
CHAC1	0.647985
ANXA11	0.647788
S100A12	0.647506
TRPC2	0.646354
WNT4	0.646312
TPST2	0.646167
LOC339535	0.64597
SYK	0.645132
GPR128	0.645059
RFTN1	0.64489
KCTD9	0.644697
HCST	0.644482
SERPINB2	0.644342
ARHGAP9	0.643887
S100A6	0.643683
GPR126	0.643614
NFKBIZ	0.643508
C19orf38	0.643417
NPY5R	0.643395
RBPMS	0.642982
C1orf59	0.642522
IRX3	0.642302
WNK4	0.641872
RASSF3	0.641075
C17orf60	0.640542
CD79A	0.640225
TAGLN	0.638993
LSP1	0.638989
TRPM2	0.638705
PTPN7	0.637905
TCN2	0.637859
LOC283731	0.637549
GIMAP4	0.637466
DUSP4	0.636964
GPC6	0.636854
TCN1	0.636511
FSTL1	0.636114
ANTXR2	0.635593
ERAP2	0.634758
NPTX2	0.634616
SLC22A18AS	0.633996
SP6	0.633755
LOC100302650	0.633726
IL16	0.63369
LOC388588	0.6335
LOC100233209	0.632814
PILRA	0.632679
IKBIP	0.632608
CPA6	0.632571
RASGEF1B	0.63238
IFITM2	0.632158
CSDAP1	0.632044
ARHGAP4	0.631586
ISG20	0.631192
VGLL3	0.630214
PARVG	0.629898
CLIC1	0.629863
EMP3	0.629811
MTAP	0.629718
AFP	0.629378
LOC150381	0.629018
PDLIM7	0.628947
KIAA0408	0.628874
HHIP	0.628815
CIITA	0.628722
PIK3CD	0.62757
CYTH4	0.627508
FAM27B	0.627074
PPARGC1B	0.62699
PPARG	0.626719
CDHR4	0.626685
ARHGAP28	0.626213
DOK3	0.625836
EMP1	0.625695
HEXB	0.625472
SLC2A14	0.62546
C11orf35	0.625361
GEM	0.625061
XPNPEP2	0.624867
GPRIN3	0.624484
CALU	0.624404
IKZF1	0.624376
HMHA1	0.624318
DHH	0.624179
ATF3	0.624145
TIGIT	0.624063
FGL1	0.624015
EPHX3	0.623872
CNTNAP3	0.6233
WIPI1	0.622978
TUBB6	0.621556
PROCR	0.621024
LAMC1	0.620985
PAX9	0.620591
C1QTNF6	0.62047
HTR7	0.620466
CD37	0.6204
KCNQ1	0.620272
GPAT2	0.620213
DOCK11	0.620115
P4HB	0.619681
LAG3	0.619667
SHISA3	0.619135
SH3BP1	0.618935
ILDR1	0.61825
SIRPB2	0.617953
SASH3	0.617722
PERP	0.617684
SDF2L1	0.617516
MAP3K6	0.617495
UNC5B	0.617482
PTPRC	0.6172
GMFG	0.616727
SLC37A2	0.616611
JDP2	0.616591
SIGLEC14	0.616207
PLEK	0.61601
IFITM1	0.614934
FCGRT	0.614559
IL8	0.613144
MT1H	0.61299
SERPINA3	0.612796
FMO3	0.61209
MAT1A	0.611871
ADORA3	0.611283
CYBA	0.611275
FAM113B	0.611037
MYO1F	0.610951
TNFAIP3	0.610814
TNIP3	0.610666
IL13RA1	0.610589
TSPAN9	0.609986
PTPRCAP	0.60981
NAT8B	0.609653
SPTLC3	0.609467
FNDC3B	0.609401
ITGA10	0.609325
MICB	0.609282
CASP7	0.60917
FYB	0.609138
TLL2	0.60909
DIRC1	0.609006
44810	0.608608
RTL1	0.607959
FAM163A	0.607906
NUPR1	0.607324
FAM101A	0.607228
CHRNA1	0.606417
STARD8	0.605679
KLHDC7A	0.605598
PLCG2	0.605468
CCR5	0.605173
FAM114A1	0.604764
LMF2	0.604687
HUS1B	0.604429
TWIST1	0.604185
NLRP2	0.604095
ENPP1	0.604012
SMAD6	0.603942
BTNL8	0.603414
BMP4	0.603311
GSN	0.602961
CORIN	0.60283
CLEC4A	0.602806
TUBA1C	0.602312
THBS3	0.602274
TNMD	0.602113
SMAD7	0.601596
ZNF469	0.601431
LOC285419	0.601096
CDH23	0.600874
UPP1	0.600603
PTGDR	0.600544
TXNDC5	0.600467
MSX2	0.600405
LGALS7	0.600175
MYC	0.600099
SH2D1B	0.599767
ENG	0.59967
ITPRIPL2	0.598243
RPS6KA1	0.598069
PDCD1LG2	0.597896
MYO1D	0.59769
MMP23B	0.597639
SERTAD3	0.597626
GPR55	0.59717
FCGR1C	0.597135
PRR15	0.59686
BLK	0.596857
LOC144571	0.596416
TNFSF13	0.596377
FCGR3B	0.596372
CPM	0.596368
FAM20C	0.596339
CCR1	0.596292
ABCC3	0.596265
TMSB10	0.596182
CASP5	0.59601
LRRK1	0.595224
CD80	0.595129
HKDC1	0.594997
CD53	0.594974
VNN3	0.594972
IGFBP7	0.594927
TSPAN8	0.594825
TREML3	0.594391
TNS4	0.594289
PTHLH	0.593756
HIST1H3D	0.593697
TPM4	0.593636
HMOX1	0.593386
ITGAM	0.593241
HAAO	0.593238
TSC22D3	0.593072
LCP2	0.59271
C16orf54	0.592306
IL1RL1	0.592084
CTGF	0.591825
SIGIRR	0.591257
PLA2G7	0.590908
APOBEC3G	0.590347
MGC72080	0.59019
ENTPD7	0.589801
ANO1	0.589575
CEP55	0.589238
LDLRAP1	0.588907
VCL	0.588896
C6orf105	0.58846
FES	0.587861
DNAH14	0.587821
CARD16	0.587741
SLC4A11	0.587341
MITF	0.5869
APOL1	0.586783
C19orf35	0.586184
TRIM38	0.586074
LRIG3	0.58595
F5	0.585895
ITIH2	0.585874
ZC3H12D	0.585407
PLTP	0.58513
SYNGR2	0.584911
MYO1C	0.583865
LAMA4	0.583772
CAPG	0.583576
C3	0.583504
ARHGAP18	0.583279
CALCB	0.582883
ARHGDIB	0.582682
ITGAD	0.582034
WT1	0.581913
EBF1	0.58184
HLA-DPB2	0.581794
KIAA1217	0.581521
NR4A1	0.581426
CLDN11	0.581371
TPM1	0.58136
IL18RAP	0.58101
ATP8B3	0.580653
POU2AF1	0.580556
PLEK2	0.580522
KLF11	0.580516
PLEKHG6	0.580404
ME1	0.579861
MR1	0.579829
TLR9	0.579719
EFNA4	0.579536
B3GNT2	0.579274
ULBP2	0.578993
OLAH	0.578993
SHKBP1	0.578909
KIAA1797	0.578526
TMEM39A	0.577883
C8orf4	0.577712
FZD5	0.577076
APOL3	0.576549
NHS	0.576525
NTF3	0.576525
HIC1	0.576497
RNLS	0.575994
TINAGL1	0.575429
GPR20	0.575246
CBWD5	0.575099
SGMS2	0.574916
HSH2D	0.574501
CENPW	0.574226
GJB3	0.574031
TTC39A	0.57362
CCNE1	0.572928
FAM78B	0.572731
REL	0.572532
ANKRD22	0.572507
REEP4	0.572131
TRAF3IP3	0.57204
SYNPO	0.571386
MT2A	0.571279
MFAP4	0.571223
PLAG1	0.57085
IGFL2	0.570325
OSMR	0.569877
C9orf135	0.569821
SCPEP1	0.569721
SLC2A3	0.569641
CXCL1	0.569579
CYP24A1	0.569489
GZMM	0.569386
POU2F2	0.568291
NFATC2	0.568078
SH2B3	0.568069
44805	0.567898
HRNR	0.567255
KIR2DL4	0.567243
ECEL1	0.567227
BPIL1	0.566785
OR51E2	0.566775
PRPS2	0.566721
LAD1	0.566555
GRIN3B	0.566543
PLAGL1	0.566386
FCRLA	0.565706
PVRL3	0.565633
FGD2	0.565458
CHRNA7	0.565186
CXCR1	0.564805
XDH	0.564763
FCRL5	0.564711
TPSAB1	0.564649
VASP	0.564623
ULBP1	0.564506
LOC96610	0.564231
NCF2	0.563935
SERPINB1	0.563827
MGC12916	0.563784
EHD2	0.563462
CDH11	0.563415
ANXA2P1	0.563159
SELPLG	0.563143
FAM3B	0.563079
HIST1H4H	0.562706
CCL23	0.562321
SLC4A5	0.561609
NRTN	0.561581
TLR1	0.560758
CHMP4C	0.560699
NFE2L3	0.559314
KIAA0247	0.559149
KCNK5	0.559004
SEC24D	0.558649
ABCC1	0.558349
PRKCD	0.558024
PLA2G2D	0.557792
EFNB2	0.55743
CCR8	0.5574
FAM81B	0.557301
COL4A2	0.556945
IRX4	0.556903
HMCN1	0.556878
GVIN1	0.556686
IER2	0.556478
F2RL3	0.556358
FGR	0.556268
MC5R	0.55616
SH3BGRL3	0.556151
UAP1	0.5559
LY6E	0.555632
PNLIPRP3	0.555579
RIPK3	0.555537
PDLIM1	0.555296
MICA	0.555273
ANKRD5	0.55517
MICALCL	0.554772
IFITM3	0.554237
MSLN	0.553218
LHFPL2	0.553206
DHCR24	0.553068
FUT7	0.552911
NKX3-1	0.552557
TRAM2	0.552302
GAA	0.552268
KLRC1	0.552244
DCUN1D3	0.552134
GPR109B	0.552019
PRSS36	0.551966
LIPG	0.551576
RELB	0.551529
SFT2D2	0.550754
C2orf65	0.550585
FAM70B	0.550498
PIM3	0.550378
EPHB4	0.550189
AXL	0.550051
APLNR	0.549932
SCGB3A2	0.549901
ARHGAP15	0.549682
ALX4	0.549011
FLI1	0.548082
WBSCR26	0.548021
GPC4	0.547957
C1orf127	0.547863
SP140	0.547612
FAT2	0.547361
SLC22A18	0.547361
P4HA1	0.546514
ZBED2	0.546374
SILV	0.546333
ZNF467	0.54602
GPX1	0.545973
HSD3B7	0.545585
SLC26A2	0.545556
SLCO2B1	0.545431
HPD	0.545256
STAP1	0.545193
IGFL3	0.544958
TMPRSS13	0.544943
FUCA1	0.544605
EDARADD	0.544242
CDKN2BAS	0.544118
LIMS3-LOC440895	0.544016
OR2A9P	0.543963
FBLN7	0.543886
TM7SF4	0.543512
C4BPB	0.542854
CD247	0.54267
FAM101B	0.542623
GYLTL1B	0.542318
TNFRSF4	0.542314
CTSK	0.541887
C1orf85	0.541887
C14orf34	0.541341
ALOX5AP	0.541252
TNFRSF10C	0.541183
DENND2D	0.541023
PPIC	0.540805
LRRN4CL	0.540657
NLRP11	0.540539
BCL8	0.540439
IRX6	0.540433
DLX3	0.540417
SERPIND1	0.540371
DMBT1	0.540362
CECR1	0.539838
SLC39A8	0.539823
DNASE1L3	0.539346
NT5DC3	0.538864
NGF	0.538833
EDIL3	0.538755
PLBD2	0.53873
RRAS	0.538693
RPPH1	0.53859
GPR160	0.538431
MPZL2	0.538136
COL4A1	0.53788
SLC23A3	0.53761
C1RL	0.537522
SNHG5	0.536812
GIMAP1	0.536569
C9orf109	0.536289
KLHL14	0.535851
MGMT	0.535585
LY86	0.535075
ROS1	0.535055
TMEFF2	0.534952
TNNC1	0.53495
TBC1D22A	0.534914
ADAP2	0.534817
SLC4A1	0.534672
RCAN3	0.534255
GPR82	0.534066
C8orf84	0.534029
TNFAIP8L2	0.533832
HSPB1	0.53378
NPAS4	0.533507
KIRREL	0.53348
HIST1H2AM	0.533441
CEBPD	0.533103
VRK2	0.532884
TNC	0.531556
EPHA1	0.531543
SH3PXD2A	0.531328
SPINK1	0.530596
RAG1AP1	0.530295
GIMAP6	0.530181
SYTL5	0.529909
C14orf72	0.529898
LOC441294	0.529566
BMP1	0.529204
LCTL	0.528706
DPEP2	0.528394
ARID3A	0.528218
WNT5A	0.528201
CREB3L2	0.528025
PDLIM4	0.527418
LGALS9	0.526684
TLN1	0.526582
RPL28	0.526345
WISP2	0.526225
CARD11	0.526183
ANG	0.52613
RGS14	0.525316
NDRG1	0.525217
CDX1	0.524693
THEMIS	0.524673
KCNE4	0.524355
FLJ35024	0.52347
RNF125	0.523331
ZNF560	0.523284
SOAT2	0.523026
KLF4	0.522964
ADAMTS9	0.522929
ATP11C	0.522811
XYLB	0.522538
DEPDC6	0.52224
FHOD1	0.5219
GYPE	0.521827
PATL2	0.521718
CASP4	0.521711
COL21A1	0.521692
APOD	0.521565
PIK3CG	0.521438
PRICKLE3	0.521354
ACRBP	0.521168
CHST3	0.520347
LOC100130872	0.519978
ABCB4	0.519903
TSHZ2	0.519716
SLC2A9	0.519523
SH2D1A	0.51941
CKAP4	0.519347
PPP1R15A	0.519215
FLVCR2	0.518826
FCGR1A	0.518749
ANKRD1	0.518262
CALCA	0.51791
CD55	0.517689
GPR34	0.517391
NOTCH3	0.51713
SCARF2	0.517092
PARM1	0.516772
STAC3	0.516637
CCRL2	0.516593
PARVB	0.516577
KRT7	0.516538
SFTA1P	0.516493
EBF3	0.516046
NLRP3	0.51567
LPP	0.515414
C15orf39	0.515366
DARC	0.515168
RBMS1	0.514928
LYL1	0.514662
KIAA1199	0.514449
TMC8	0.513858
LTBP1	0.51385
FOXA1	0.513616
NPY1R	0.513348
C11orf88	0.51292
MAFF	0.512704
HCP5	0.512636
DAPP1	0.512564
DHRS3	0.512222
TAGLN2	0.512185
TFCP2L1	0.512084
MCM5	0.512054
GRB7	0.512028
ST6GALNAC5	0.51164
BLVRB	0.511638
C10orf54	0.511444
FHAD1	0.511222
GPR68	0.51117
TBX4	0.510991
SLC2A5	0.510898
POLD4	0.510831
GPR115	0.510825
SAMSN1	0.510684
CCDC134	0.510575
SIGLEC5	0.510511
NAGS	0.510351
RPS6	0.510329
WNT11	0.510173
OTUD1	0.509578
CD40LG	0.509503
ALDH3B1	0.509195
RASSF5	0.508854
ST8SIA2	0.508514
B3GNT3	0.508438
GUSB	0.508244
SERPINB9	0.507977
IRF5	0.507834
NDUFA4L2	0.507795
UCP2	0.507789
NANS	0.507749
PARP15	0.507492
HIST1H2BO	0.507411
PLK3	0.507213
RPL8	0.507169
THOC5	0.507007
GAPT	0.506998
TNFRSF1A	0.506994
ZNF600	0.506967
CD300LF	0.506673
OXER1	0.506529
BMP8B	0.5065
MT1G	0.506401
NCR3	0.506397
PRL	0.506374
ATF7IP2	0.506328
TSKU	0.506179
CD84	0.506162
HLA-G	0.50608
ATP8B4	0.505706
EHD4	0.505586
S100Z	0.505481
RGS10	0.505471
EGR3	0.505185
CACNA1C	0.505126
CLECL1	0.504906
PTPLA	0.504821
LMAN1	0.504614
FOXS1	0.504385
FFAR2	0.504262
IL10RB	0.504216
SLC35E4	0.503344
LTK	0.503022
SCNN1G	0.503017
SNX20	0.502911
DAZL	0.502515
H2AFY2	0.502066
LOC100133920	0.502027
PDGFRB	0.501894
TIFA	0.501793
TMEM2	0.501488
RCSD1	0.501477
SMPDL3B	0.501468
SNTG2	0.501384
C6orf132	0.50125
ASCL2	0.501148
RORC	0.500853
KIAA1949	0.500649
MICALL1	0.500539
TRIM58	0.500463
PABPC4	0.500439
EMP2	0.500387
SQRDL	0.500219
AVPR1A	0.500056
PABPC1	0.499915
GALNT6	0.499883
RPS12	0.499305
SELENBP1	0.499183
HHEX	0.499137
TLR6	0.499013
GIMAP7	0.49877
SCUBE3	0.498479
HAVCR2	0.498326
SERTAD1	0.498107
FURIN	0.498045
RPS20	0.497598
H2AFJ	0.497456
TBC1D16	0.497091
KRT17	0.497081
TP53I3	0.49675
C3orf36	0.496715
TNNT3	0.496432
HLA-F	0.496289
RGL4	0.496206
ESR1	0.496147
TBX19	0.495807
ARHGAP22	0.495253
GGT5	0.495199
PRRX1	0.495191
SGK1	0.494855
RPL18A	0.494813
SCIN	0.494586
KIAA0020	0.494343
SOAT1	0.493672
HS3ST3B1	0.493513
HLA-B	0.493438
FAM7A2	0.493289
DIO1	0.493212
NTAN1	0.492855
SCN5A	0.492318
SPINK6	0.492144
MGAT1	0.491697
FAH	0.491582
TPM3	0.491371
TRPV2	0.491318
AOX1	0.490308
NT5DC1	0.489922
C6orf115	0.489844
CTSD	0.489775
PLOD3	0.489505
SBNO2	0.489468
EVI2B	0.489388
SMPDL3A	0.489273
FAM109B	0.488966
MGC87042	0.488269
VSIG10L	0.488199
IL20RB	0.487971
TRPC6	0.487962
LATS2	0.48793
HK2	0.487929
TBX18	0.487822
CUZD1	0.487578
ST8SIA4	0.487481
CD276	0.486304
TFEC	0.486252
PTGIR	0.486232
HERPUD1	0.486116
NAP1L6	0.486094
KLF8	0.48609
MYO1B	0.486066
RHOG	0.486027
SH2D3A	0.485996
ANGPT1	0.485923
HLA-E	0.485884
LMNA	0.485663
EDEM1	0.485654
TNF	0.485419
LOC134466	0.48541
RPS17	0.48535
NPAS1	0.485342
CIDEC	0.4852
GAS2	0.485176
VASN	0.484678
ULBP3	0.484649
MESDC1	0.484604
PTAFR	0.4841
AMPD3	0.484025
MFSD1	0.483932
LGMN	0.483845
STAT4	0.483604
GBA	0.483496
KRT15	0.482756
CHSY1	0.482679
DDX43	0.48239
SULT1E1	0.482041
WIPF1	0.482032
NFKB2	0.481939
NR4A3	0.481745
DIAPH2	0.481488
RAET1L	0.481367
ENPP2	0.480941
ELK3	0.480835
OLFML2A	0.480634
CRYBA4	0.480597
SULF1	0.480456
C4orf32	0.48042
GPR64	0.480398
PML	0.480252
ZNRF2	0.479754
SLC43A1	0.479642
SH3RF2	0.479073
TK1	0.478708
TCL6	0.478701
LAMA3	0.478562
C22orf26	0.478234
RALGPS2	0.478075
TSPYL5	0.478073
LIMK2	0.477683
CSF3R	0.477265
RENBP	0.47662
MERTK	0.476278
TMPRSS2	0.475851
PLEKHO2	0.475752
S100P	0.4753
TWF2	0.475286
FLRT2	0.475274
RPP25	0.475243
FILIP1L	0.475012
TMEM158	0.474955
SYDE2	0.474767
SPINK13	0.474486
FMOD	0.474198
ARMC3	0.474165
LRRC32	0.474096
TNFRSF10B	0.473936
FCGR1B	0.4739
GAS6	0.473712
SERPINB7	0.473648
LOC100188949	0.473583
KLF10	0.473453
SIPA1	0.473446
SH3BP5	0.473318
LOC148824	0.473171
CYGB	0.473052
TMEM92	0.473037
C9orf66	0.473018
CD22	0.472938
GPR157	0.472396
PSD4	0.472372
CLN6	0.47237
NPR1	0.471889
ABCG1	0.47175
UBTD1	0.471017
MSL3L2	0.470918
TEAD4	0.470798
ZBTB7B	0.4707
LHX8	0.470474
P2RX4	0.470422
ASTL	0.47035
ALPK1	0.470313
TBC1D10A	0.470196
ANK1	0.46981
KCNE3	0.469644
CREG1	0.469529
NOD1	0.469469
RAB20	0.46923
P2RY6	0.4689
SCARA5	0.468721
SGCE	0.468561
LIMS3	0.468197
LINGO2	0.468154
NRK	0.468095
POLE4	0.468051
SUMF1	0.467869
ARPC5	0.467819
JOSD1	0.467693
WWTR1	0.467672
ALX1	0.467568
RGS19	0.467503
TLR7	0.46742
TFPI	0.46707
ACTBL2	0.466931
IGF2AS	0.466705
GJA3	0.466614
ARSA	0.466509
PLD1	0.466453
ZNF702P	0.466394
SSR4	0.466207
HEPH	0.46618
FAM105A	0.466127
TGM2	0.466096
TNFSF15	0.465897
KLHL9	0.465692
ZNF618	0.465648
LILRB1	0.465337
ADAM28	0.465048
PABPC3	0.464551
PPP1R3B	0.46446
ESYT1	0.464436
CDCA4	0.464436
FUCA2	0.464219
FOXP1	0.4639
SPAG6	0.463725
UBASH3B	0.463555
TNFAIP8L3	0.463401
STOM	0.462726
ANXA3	0.461755
ITGB4	0.461607
CDKN3	0.461505
ADH1C	0.46145
DMC1	0.461359
CSF2RA	0.461306
EGR1	0.461105
TKT	0.461047
WDR63	0.460983
CSF1	0.460479
[truncated: 18,503 more rows]

## Sheet: HNSC
GeneSymbol	logFC
KRT19	2.57866
UGT1A6	2.43762
KRT8	2.40163
NTS	2.34919
UGT1A9	2.24741
C1orf110	2.00272
DMRTA2	1.99988
GSTA1	1.96668
CEL	1.88259
TSPAN1	1.81959
CES1	1.79426
FOXA1	1.7734
GDF15	1.74806
CBS	1.70159
ALDH3A1	1.67588
UGT1A7	1.66732
CLDN3	1.6478
ADH1C	1.6429
CLDN8	1.63093
PNCK	1.57515
MUC4	1.55117
CYP26A1	1.53241
SLC29A2	1.51288
UGT1A8	1.48807
SYCP2	1.47492
C19orf46	1.4661
ADH7	1.44318
CES4	1.42976
CYP4F11	1.41776
TLX3	1.41615
NTRK2	1.40772
GLS2	1.40727
CYP2S1	1.39418
TMC4	1.39412
WFDC2	1.38118
CYP4F3	1.36851
SLC1A5	1.36183
FLJ46111	1.34059
RNFT2	1.33361
KRT18	1.32178
YBX2	1.30961
GLB1L2	1.30547
MRAP2	1.30223
EPCAM	1.30078
LOC541473	1.28784
GPX2	1.26428
UPK3B	1.26345
ALDH1A1	1.26099
WNK2	1.24269
FOXJ1	1.23909
HSD17B3	1.20974
SAMD12	1.2043
EYA2	1.19913
ZIC2	1.19715
KIAA0319	1.197
SNX31	1.19117
CLGN	1.18879
SGEF	1.1857
KRTCAP3	1.17653
VTCN1	1.17166
ITPKA	1.16905
ZNF541	1.14559
PLLP	1.13375
ISYNA1	1.12593
KIAA1324	1.12227
NRCAM	1.12023
GCHFR	1.11877
SCN9A	1.10747
FAM3B	1.10663
ABCA13	1.10624
UGT1A10	1.10559
PANX2	1.1004
C11orf92	1.0978
FKBP6	1.09711
MOSC1	1.09665
ANXA10	1.09255
EPHA7	1.09212
SLC27A5	1.09131
AGR2	1.08564
SIX4	1.0793
ACBD7	1.07913
MUC20	1.07539
CABYR	1.07283
ICAM4	1.07214
FOXD3	1.06481
SIX2	1.06303
LOC254559	1.05493
PRR15L	1.05478
PCLO	1.04993
PHGDH	1.04753
RAB3B	1.04353
NEURL	1.03899
GCNT2	1.03582
WBSCR27	1.02684
MFI2	1.02473
SNCG	1.01996
MUC2	1.01512
GSTM3	1.01506
CCL26	1.01467
ZIC5	1.01417
C10orf35	1.01409
AKR1C3	1.00935
SOX2	1.00818
OSGIN1	1.00705
TMEM116	1.00539
ISM2	1.00348
UGT1A3	1.0034
MAPK10	1.00224
PLAC8	1.00183
PTH2R	0.998359
RASSF9	0.99752
MIOX	0.997315
GPC3	0.996477
TG	0.995437
MYO3A	0.993002
STAG3	0.988803
GSTM1	0.98744
CLDN7	0.981768
COLEC11	0.97285
C6orf168	0.972269
KLHL35	0.97128
ZDHHC11	0.966057
GRIN2D	0.966012
CLU	0.965011
AKR1C1	0.962488
ZNF488	0.957607
WBSCR28	0.955488
MGST1	0.954219
PODXL2	0.953323
DUSP9	0.951478
FEZF1	0.950203
ALOX15	0.948046
TMPRSS2	0.947236
B4GALNT2	0.945945
MSMB	0.943795
SYNGR3	0.938681
TCAM1P	0.933535
LOC440356	0.927983
HAP1	0.922686
SPP1	0.92006
CES3	0.919848
SCGB1A1	0.91798
PPAP2C	0.914516
GAL3ST2	0.909376
LOC201651	0.908633
GSR	0.908069
CX3CL1	0.907418
HEY1	0.903474
PPP2R2B	0.903315
WBSCR26	0.903231
CP	0.902044
CENPV	0.899309
HPDL	0.899019
GSTM2	0.896873
TACR2	0.896311
FAM195A	0.895047
RHBDL1	0.891748
C11orf16	0.891532
FAM83E	0.890986
FGF19	0.887459
NPTXR	0.887154
CDKN2A	0.886842
GSTM2P1	0.885967
ZYG11A	0.883989
C9orf140	0.883775
BEX2	0.882243
TDRD5	0.881855
PAFAH1B3	0.881706
CCDC155	0.877493
DKK1	0.87539
DOK7	0.873729
EPHX1	0.873682
INA	0.871131
MECOM	0.86975
LOC730101	0.867416
ADAP1	0.866769
CALB1	0.866262
TCF15	0.864654
A4GALT	0.864547
ZNF695	0.864036
UCHL1	0.863662
SULT1A1	0.86345
ERN2	0.862967
MAST1	0.861802
ZDHHC2	0.854586
PDE4C	0.852621
NKX2-3	0.85248
C10orf81	0.851926
MGC4473	0.851315
TXNRD1	0.850595
HOXA10	0.848636
ASNS	0.848365
SOX2OT	0.847679
CLEC2L	0.846383
AKR1C2	0.845729
KHK	0.844629
RPP25	0.843348
ABCA17P	0.837687
PLEKHG6	0.83754
B4GALNT4	0.83532
ALCAM	0.835048
GCLM	0.834785
ZNHIT2	0.831861
LOXL4	0.83099
SIX1	0.830668
TCP11	0.830558
MYEOV	0.829571
UBE2S	0.829186
SLC9A2	0.828249
PRR15	0.81939
AIFM2	0.818378
DHDPSL	0.815429
PRDM13	0.814381
MAOA	0.81269
JAKMIP3	0.812366
SYT17	0.810948
POU4F1	0.808466
NOBOX	0.807729
TREML3	0.807645
MNX1	0.805168
C11orf93	0.80304
SCARA3	0.80303
ABHD11	0.802962
ATP6V0E2	0.802325
CNNM1	0.799408
C19orf48	0.799194
DSCR6	0.79881
IGF2BP1	0.797732
C11orf9	0.796963
PLS1	0.796928
MAP7D2	0.796494
SPDYC	0.796272
NGB	0.79582
ETNK2	0.795698
CENPM	0.794924
HNF4G	0.793366
MAGEA1	0.792405
TRIM74	0.791684
FAM24B	0.790529
TLX2	0.788886
NSUN7	0.787707
SLC12A7	0.787059
SMC1B	0.786291
LOC399815	0.786065
NPM2	0.784048
AKR1E2	0.782916
NUPR1	0.782276
NEU4	0.780863
AADAC	0.780295
TFR2	0.78008
IRX6	0.780077
HPN	0.780047
SLC8A2	0.779859
PSAT1	0.779746
SOX13	0.778372
RANBP17	0.77836
RNF165	0.777619
BCAT2	0.77666
OR7A5	0.774419
RCOR2	0.773643
SHH	0.773079
MDK	0.771232
FAM71E1	0.771053
TEX15	0.770917
C18orf56	0.770607
DNAJB3	0.770103
C9orf122	0.76941
SLC22A20	0.767293
C15orf55	0.767256
SIM2	0.765006
EPS8	0.76478
FLJ45445	0.762602
NOS2	0.762337
CSMD1	0.760102
GRIN2C	0.75964
WDR72	0.758332
KRT15	0.756789
TJP3	0.756641
RND2	0.754661
PTX4	0.754581
MYB	0.752693
UGT8	0.752421
C6orf154	0.752346
KRT7	0.751214
FXYD3	0.750846
HMSD	0.749541
ELF3	0.748596
ESPNL	0.748595
GABRP	0.748008
STOX1	0.74453
DLL3	0.743155
SOX21	0.742718
NCRNA00086	0.738965
TUBBP5	0.737981
RTDR1	0.737831
P4HTM	0.737013
PIR	0.736178
TMEM139	0.736168
FGFBP2	0.73608
DNAJB13	0.735394
COCH	0.734943
FTL	0.734696
FADS2	0.733777
EFCAB4A	0.733672
PTPRS	0.73362
INHBE	0.733107
GOLT1A	0.731899
MYH14	0.73183
HMX2	0.73045
SLC16A14	0.730368
LOC286467	0.729221
SP9	0.729113
SLC45A4	0.728188
MACROD1	0.727849
DDIT3	0.727721
CHST7	0.726746
LOC441869	0.726376
KCNN4	0.726244
GSTM4	0.72355
SLC4A11	0.722503
HIST2H3C	0.720628
TMEM216	0.720234
PGD	0.720116
C17orf82	0.717649
GAD1	0.71684
CCNO	0.716685
TRPV4	0.716278
UPK1B	0.716028
CCDC114	0.715397
RAB26	0.715111
PKD1L2	0.71409
TSGA10IP	0.71335
ACPL2	0.709518
HAGHL	0.707628
MLF1	0.707132
SIGLEC11	0.703957
SYNGR4	0.702257
TCEA3	0.702141
SYT1	0.700721
CAPN13	0.700121
GCLC	0.699085
KIAA0114	0.698897
MESP1	0.698331
RGS9BP	0.697877
BRSK2	0.697367
SULT1A2	0.696256
PHYHIP	0.693687
NT5M	0.692099
FAM190A	0.691354
FOXH1	0.691288
FAM64A	0.690644
FBL	0.690124
NR5A1	0.689622
RIMKLA	0.689275
EPB41L1	0.687668
KCNC3	0.687103
LPPR1	0.68671
PLA2G16	0.686581
MFSD2B	0.686537
LDHC	0.685835
RAC3	0.684853
CCDC74A	0.68326
C17orf53	0.683021
TIGD3	0.682792
SBK1	0.682756
CLDN20	0.682593
PLEKHG4	0.679121
NQO1	0.678971
UBE2C	0.678957
NUP210	0.677794
MEST	0.677663
TMEM52	0.677288
E2F1	0.677234
C9orf152	0.677174
CACNA1B	0.677011
SYCE2	0.675694
KCNS3	0.675567
FNDC8	0.67329
RNF183	0.671856
TKT	0.668731
CTF1	0.667546
SLC5A11	0.667117
SFXN2	0.666927
CYP2W1	0.666852
MANEAL	0.666742
UMODL1	0.665937
DIRAS2	0.664748
CHCHD10	0.664065
SERPINF2	0.663968
SOHLH1	0.663112
LRFN1	0.662275
CCDC106	0.662134
UBE2T	0.661599
LOC92659	0.66128
RHPN2	0.660638
NECAB2	0.660616
FCHO1	0.659527
STC2	0.65916
DCHS2	0.658653
ADM2	0.658352
CLDN9	0.6567
C9orf116	0.656497
BTBD16	0.655433
PRR5-ARHGAP8	0.654385
RECQL4	0.65283
SRXN1	0.652578
OTX1	0.651966
SLC6A8	0.651422
HES7	0.65123
DMRT2	0.650704
VWA5B2	0.650211
C19orf77	0.650198
RHEBL1	0.649672
DHRS13	0.648735
CCDC74B	0.648593
ATP13A5	0.647002
LRP1B	0.646768
LAMB2L	0.645991
ARTN	0.645433
PARD6A	0.644161
C5orf38	0.644001
BBC3	0.643732
GOLGA2B	0.643305
HOXA11	0.643267
KCNG3	0.642863
NUDT11	0.642193
TBX6	0.640915
GPR85	0.639103
C1orf125	0.638984
ANKRD2	0.637669
EIF4EBP3	0.637661
ZNF620	0.637589
KCNJ14	0.637056
TROAP	0.636656
ZNF771	0.635482
RPS6KL1	0.635294
PDE6A	0.634883
NPAS1	0.634656
ASS1	0.633824
CHADL	0.633379
NMB	0.632623
AIFM3	0.632539
SHISA7	0.632455
GCAT	0.632274
NPPC	0.632186
C8orf55	0.6313
CAPS	0.631104
C1orf51	0.62976
RIBC2	0.629059
SRGAP3	0.62817
SYT2	0.627671
C19orf61	0.627647
WFDC3	0.627288
LY6K	0.626549
NCRNA00176	0.626528
RFPL3S	0.626396
ABCC5	0.626041
ENPP5	0.625146
HIST3H2A	0.624926
CHCHD6	0.624574
ACP6	0.624212
AP3B2	0.624122
LGALS4	0.623788
TMEM20	0.622157
C7orf46	0.622004
FRAT2	0.621652
CYP2B7P1	0.621282
MFSD4	0.621074
NCEH1	0.620855
CLDN10	0.620824
CYP4F12	0.620155
ANKLE1	0.619961
PAX9	0.619664
KCNE3	0.61876
G6PD	0.618657
PTCH1	0.618579
ASF1B	0.618254
PRKX	0.618187
KCNMB3	0.61793
PLD6	0.617362
FMO6P	0.617222
SEC14L4	0.615578
FADS1	0.615363
PRSS21	0.615255
TMEM160	0.614197
LOC339535	0.613647
LOC440905	0.613223
FA2H	0.612563
PPP1R14D	0.612023
ASRGL1	0.61184
TMEM145	0.611676
AURKB	0.611316
SYCE1L	0.610598
LOC388796	0.609899
PRR19	0.609446
GFRA3	0.609297
GPX4	0.608535
BIK	0.608476
ILDR1	0.606764
PPP1R3G	0.606672
C16orf75	0.606259
ETV5	0.605333
PIGR	0.60464
PBK	0.604048
EXOSC5	0.603768
RDM1	0.603384
SPIRE2	0.603326
GSTA2	0.602984
GNMT	0.602924
SUV420H2	0.602078
RPH3AL	0.601933
BMP3	0.601919
HIF3A	0.601835
HS6ST2	0.601673
PGPEP1	0.601462
FOXRED2	0.600749
CDCA3	0.599207
DHRS3	0.598483
CDKN2BAS	0.598065
TLL2	0.597944
DLX6	0.596502
BLVRB	0.59649
C14orf162	0.595786
PTGR1	0.595503
PLA2G10	0.595181
IGF2BP3	0.594738
B3GALNT1	0.594636
PHACTR3	0.594475
LOC728554	0.594458
PLAT	0.594303
LIG1	0.593945
TMEM97	0.593367
MSL3L2	0.592575
PTN	0.592481
RHPN1	0.592189
C16orf59	0.591981
SLC19A1	0.591163
IVD	0.590931
DKKL1	0.590823
LOC100128191	0.58966
PSCA	0.589529
CLUAP1	0.589297
C21orf63	0.589178
ZNF579	0.587317
PIPOX	0.58601
SSTR5	0.585305
FTCD	0.584544
ACSS1	0.584096
LOC388588	0.583963
KRT83	0.583901
CCDC150	0.583568
GINS2	0.582811
STAR	0.581472
ASB9	0.581089
RASL11B	0.580616
UGDH	0.58001
BMP7	0.5799
PRODH	0.579793
TMEM25	0.578747
GNAZ	0.57864
NR2C2AP	0.578544
PYCR1	0.578057
NEUROD2	0.57788
LOC389458	0.577536
ECHDC3	0.577007
LOC643719	0.576895
FAM71E2	0.575992
ABCB9	0.575429
DCI	0.574976
C9orf125	0.574974
SRCRB4D	0.57418
ANKRD20A3	0.573995
GPR172B	0.573786
SLC25A21	0.573454
PTPRQ	0.573334
CDCA5	0.572894
TIMP4	0.572844
CCDC154	0.572487
TFAP4	0.572418
LOC100133161	0.571619
RBM11	0.571438
ZPBP2	0.571082
CDT1	0.570947
LTBP3	0.570613
ETFB	0.570245
SLC39A4	0.570089
SHMT2	0.569761
TEX19	0.569384
SLC7A11	0.569305
SNHG6	0.568572
DGKG	0.568548
LOC149134	0.568285
SIGIRR	0.568095
B3GALT5	0.567854
C12orf54	0.567289
LCN12	0.567286
C3orf47	0.56665
AKR7A3	0.566507
CELP	0.566377
B4GALNT1	0.56606
TRAPPC6A	0.565505
SLC27A2	0.565451
SLC9A4	0.565359
ABCB6	0.564739
GCK	0.564444
SLFN13	0.564114
DBP	0.563813
RAD54L	0.56381
TAF7L	0.563574
C1orf190	0.563373
SCGB2A1	0.563262
TFRC	0.562893
LRRC4	0.562586
RNF17	0.562199
SPC24	0.561324
MRPS26	0.561277
TMEM27	0.561042
COL9A2	0.560726
H2AFX	0.560519
FAM184B	0.559969
CT45A1	0.559649
RMRP	0.55871
LOC113230	0.558707
HMGA1	0.557934
C21orf88	0.557767
C10orf75	0.557692
C8G	0.557505
THOC3	0.557142
ABCA2	0.555994
MYBL2	0.555967
DHDH	0.555702
TNFRSF18	0.555459
ZNF48	0.555242
GCNT3	0.555093
SLC46A1	0.555086
ANKRD34B	0.555043
TRIB3	0.554845
C5orf34	0.5541
C10orf47	0.553439
ECE1	0.553171
KAZALD1	0.552337
FZD9	0.552164
SLCO1A2	0.551947
HMGB3	0.551521
GPX1	0.551378
C2orf15	0.549859
CREB3L4	0.549843
GRK7	0.54974
CROCC	0.549676
TEAD2	0.549583
DMRT3	0.548703
PCBD1	0.548398
GAS5	0.548033
MCM2	0.54768
WDR49	0.547492
LOC100128640	0.546931
YDJC	0.546532
PPM1N	0.546526
HES6	0.546168
NT5DC3	0.546045
LEFTY1	0.545872
GRTP1	0.545365
RAGE	0.545091
RAB36	0.544935
SCPEP1	0.544752
CHST9	0.544637
SLC25A4	0.544337
FAM181A	0.543556
SRRM5	0.543349
CCDC34	0.54326
STEAP1	0.543138
SSBP4	0.543026
LYPD6	0.542636
CMBL	0.542515
ANKRD24	0.542371
LGI3	0.541996
ORAI3	0.54195
DAGLA	0.541926
SIGLEC16	0.541253
PPP1R1B	0.541132
B3GNT3	0.541057
FIBCD1	0.540924
GKAP1	0.540747
TMEM56	0.540673
SLC16A8	0.540615
GATS	0.539981
UGT2A1	0.539615
CYP2D6	0.539448
ARHGEF33	0.539181
MUC16	0.538579
GPI	0.538413
VSIG10	0.537965
SMYD3	0.537811
FIGF	0.537464
CDK4	0.537307
PAK7	0.53713
NKX1-2	0.537071
SCD5	0.537011
CRYGS	0.536946
DTNB	0.536883
LRRC46	0.536031
SLC10A4	0.534946
LOC100133545	0.534825
C11orf83	0.53444
FN3K	0.534134
FAM83D	0.533941
KATNAL2	0.533529
NEK2	0.533424
MAPK12	0.533287
KIAA1244	0.533223
ZFR2	0.533138
CHKA	0.533082
SLC30A3	0.532901
RFC4	0.532854
HOXA5	0.532488
CLCN2	0.532411
POLR2I	0.532236
MUC6	0.531857
BID	0.531557
GPT	0.531249
CHDH	0.530991
DMBX1	0.530864
C11orf88	0.530231
WDR34	0.530047
MUC13	0.530034
FAM27C	0.530014
MND1	0.52983
LIPE	0.529686
HOXA11AS	0.529529
RAB6B	0.529346
KCNJ11	0.529135
CSPG5	0.52904
TRAIP	0.528789
LDHB	0.528784
PRR7	0.528711
SOX12	0.52871
KEL	0.528341
HIST2H4A	0.528239
CKS1B	0.528045
CGREF1	0.527987
FLVCR1	0.527573
GPR63	0.527526
RENBP	0.527206
SPSB2	0.526618
SLC26A5	0.526473
HOXB13	0.526189
G6PC3	0.525649
SNRPD2	0.525511
NUF2	0.52506
DPP7	0.524843
LEMD1	0.524751
TRIP13	0.524286
RPS4Y1	0.524111
ROM1	0.523995
NDC80	0.523947
CDKN2C	0.523495
ALX1	0.523493
FAHD2B	0.523086
PCP2	0.522776
ISOC2	0.522763
OIP5	0.522621
QPCTL	0.522555
MBOAT1	0.522502
HOXA3	0.52237
SLC5A12	0.522139
HRK	0.522095
TK1	0.52198
H2AFZ	0.521641
C8orf51	0.520996
LOC388242	0.520413
TYMS	0.520052
MAGEA12	0.519917
IGFBPL1	0.519639
FTHL3	0.519599
PADI3	0.519268
RPL39L	0.519103
CCNB1IP1	0.518678
PATZ1	0.518578
C11orf85	0.518569
B9D2	0.518271
FTH1	0.518213
CDK1	0.51804
LSR	0.517959
CHODL	0.517898
UGT1A1	0.517651
TSPAN7	0.517618
SDHAF1	0.51742
PP14571	0.517366
DHRS2	0.517316
TCEA2	0.516653
ZSCAN16	0.516321
REM2	0.51609
GLI4	0.516087
TOMM40	0.516061
RPL13P5	0.515447
CDC45	0.515228
CTU1	0.515164
B4GALT4	0.51516
IDUA	0.514653
TPX2	0.514262
LSM4	0.514262
GLA	0.514199
MMP15	0.514057
PVT1	0.513987
RNASEH2A	0.513799
SLC22A11	0.513738
C1orf135	0.513292
PRDX1	0.513217
DCXR	0.513201
ATP6V1B1	0.513023
LOC100132215	0.512669
ZBTB12	0.512575
KRT36	0.51255
CCDC151	0.512083
DTL	0.511974
LOC647946	0.51187
WNT2B	0.511575
MYO5C	0.511383
NR0B1	0.510975
C1orf133	0.510845
PDCD2L	0.510348
MNS1	0.510206
ENTPD8	0.510064
PAX6	0.509955
ISL2	0.50981
SLC6A16	0.509388
C20orf199	0.508968
SLC44A4	0.508825
BCL2L12	0.508541
XYLB	0.507575
CYP4X1	0.507259
RPS19	0.507183
RILPL2	0.506807
STRA8	0.506707
ZP3	0.506672
LRP3	0.506479
AGR3	0.506075
SAC3D1	0.505992
MYH7B	0.505831
CRYBB3	0.505664
JPH1	0.50562
C20orf134	0.505521
C15orf56	0.505044
PPAPDC1B	0.504857
ALDH1L1	0.504705
TCTEX1D2	0.50447
DDC	0.502716
CORO2A	0.502671
CPNE7	0.502006
FAM92A1	0.501946
MRPS12	0.501861
AMN	0.501768
SUV39H1	0.501526
SKA1	0.501287
SERHL2	0.501042
ZG16B	0.501012
CEBPD	0.500654
KIF2C	0.500473
ORC1L	0.499877
FAM128A	0.499653
IBSP	0.499603
HJURP	0.499357
CDC25A	0.499344
GGT7	0.499318
PTPRU	0.499092
TSPAN33	0.498726
FANCL	0.498624
CCBL1	0.498514
DHX35	0.498275
ST3GAL3	0.497573
TINAGL1	0.497554
C11orf84	0.497307
ACVR2B	0.497186
MCM7	0.497156
ZNF296	0.496447
CD320	0.496158
CDKL2	0.496026
SLC7A2	0.495908
MERTK	0.495813
CCDC78	0.495682
PSMC3IP	0.495273
SYDE2	0.495201
SLC4A5	0.495186
DHX34	0.495171
LOC389493	0.495003
HOXA4	0.494838
PDE6B	0.494632
TAS1R1	0.494097
B3GNT7	0.493823
ERAP2	0.493317
SLC25A33	0.493101
MTL5	0.492471
SPANXA2	0.492349
LOC678655	0.491401
TMEM205	0.491172
TALDO1	0.491098
PKN1	0.490953
CENPH	0.490519
TCN2	0.490486
RAD54B	0.488688
HMGA2	0.488283
FSTL4	0.488192
DNAJC22	0.488159
GINS4	0.487725
FAM27A	0.487153
NFKBIL2	0.487101
CDC25C	0.486684
VPS37D	0.486668
CA11	0.486404
KLHDC7B	0.486341
ENTPD6	0.486004
GALNT12	0.485833
CORT	0.485532
CILP2	0.485279
C12orf47	0.485246
SPHK2	0.485175
KLHDC9	0.484953
NUDT16P1	0.484803
MUC1	0.484674
PYCR2	0.484085
C20orf27	0.483971
GDA	0.483771
HOXB8	0.483559
LOC84740	0.483018
ETV4	0.482678
LOC146336	0.482129
CHEK2	0.481869
HHIPL2	0.481793
SLC25A29	0.481716
MT3	0.481647
SPC25	0.48131
TIMM50	0.481309
PNMAL2	0.481009
ABCC3	0.479643
FAM69C	0.479637
SP8	0.479294
STMN1	0.479275
ADCK4	0.478113
SCUBE3	0.477892
OXGR1	0.47764
RDH10	0.477622
PRMT1	0.476677
SAE1	0.476643
HOXA7	0.476548
P2RX4	0.476546
LOC100133669	0.475898
ESCO2	0.475808
CLDN1	0.475697
ZNF497	0.475658
SPATA21	0.475637
TRIM16L	0.475423
SUSD4	0.475299
PGPEP1L	0.475054
C7orf54	0.474948
PHYHD1	0.474922
CHGA	0.474541
NINL	0.474479
C12orf57	0.474442
AMY2B	0.47439
AMZ2P1	0.474162
GABRR1	0.473755
LAGE3	0.473528
POLR2H	0.473451
PCK2	0.473439
PNKP	0.473265
C1orf14	0.473001
CUZD1	0.472962
FAM81A	0.472702
LOC284578	0.472527
HSD11B2	0.472377
NCRNA00092	0.47234
EPB41L4A	0.471951
OPRK1	0.47148
HSPE1	0.471286
ALDH16A1	0.471259
NDUFA3	0.470948
SAP30	0.47067
UBXN11	0.470643
SPANXC	0.470444
APITD1	0.4703
NMNAT3	0.470267
RAD51	0.47009
CENPJ	0.47002
SDHAP2	0.46962
EME1	0.469611
WNK3	0.469314
HORMAD1	0.468974
KCNH1	0.468769
ZNF606	0.468686
LPCAT4	0.46862
ERMP1	0.468612
PRDM12	0.468422
HKDC1	0.468211
ACCN4	0.46801
MPP2	0.467966
SNHG1	0.467846
CNTN5	0.467387
RNF32	0.467174
RPPH1	0.46715
TLCD1	0.466844
SLC26A1	0.466783
TMPRSS4	0.466511
C19orf54	0.466382
ERP29	0.466295
C5orf32	0.466136
LENG9	0.466055
CHRNA5	0.46584
USH1C	0.465813
MTMR8	0.465568
SCARNA12	0.465476
FGF13	0.465276
BIRC5	0.465203
PKDCC	0.465098
PSIP1	0.464844
KRT20	0.464521
ESPL1	0.464514
RAD51AP1	0.464331
ANO7	0.463881
ENO2	0.463804
C19orf21	0.463316
RUVBL2	0.463074
HAUS8	0.462942
LOC729375	0.462912
IRF2BP1	0.462626
C19orf60	0.462512
C15orf42	0.462403
PDIA2	0.462088
AHCY	0.46193
ALG1L	0.461565
C2orf48	0.461153
FAM71F1	0.46065
IRS4	0.460579
PNLDC1	0.460554
ZNF580	0.460325
CRB2	0.460154
SLC48A1	0.45996
HSPBP1	0.459819
ADCY10	0.45963
SLC16A11	0.459611
ZNF285	0.459494
LOC339674	0.458924
HLTF	0.458639
PIWIL2	0.458625
MAPK15	0.458576
LOC100130093	0.458147
PEMT	0.458008
CKS2	0.457766
ZNF787	0.457716
SCN2A	0.457451
MRM1	0.457206
ARHGAP8	0.457065
NAT14	0.457046
CENPF	0.45699
CALHM1	0.456988
C2orf71	0.456828
PRB3	0.456768
POLQ	0.456627
MAP1S	0.456536
OCA2	0.456454
CHAF1A	0.45599
FGFBP3	0.455882
FAAH	0.45574
GPR62	0.455712
CAMK2N2	0.455688
LAPTM4B	0.455615
PLAG1	0.45531
LOC100129534	0.455291
ZNF239	0.455237
ORC6L	0.45515
C20orf96	0.455023
NTF4	0.454985
GABARAPL1	0.454852
CNPY3	0.454792
CENPW	0.454616
SPAG5	0.45445
NEFH	0.4544
WNK4	0.454234
ALG3	0.454014
RAB40AL	0.453972
MPP3	0.453571
LRRC56	0.453475
SLC26A10	0.453028
ZNF428	0.45289
DNASE2	0.4526
HHAT	0.452497
DSCC1	0.452385
CPLX2	0.452194
RSPH6A	0.452174
CBX2	0.452173
COLEC10	0.452172
PTPLAD1	0.45205
CBR1	0.451726
GIYD2	0.451404
C11orf53	0.451324
FAM95B1	0.450916
SYBU	0.450912
CCDC42B	0.450539
EXO1	0.450516
AP3M2	0.450389
RNASET2	0.450176
SPEF1	0.449924
MSLN	0.449831
C11orf52	0.449552
STOML3	0.449503
FAM72B	0.449461
OPLAH	0.448899
AKR1B1	0.448516
NR1I3	0.448427
KLHL23	0.448412
POLD1	0.448343
NUDT6	0.448168
TGIF2	0.44807
TOR3A	0.447688
MIA	0.447534
SQSTM1	0.447511
NDUFS6	0.447442
MLXIPL	0.447202
CATSPERG	0.447102
BLM	0.446893
GLUL	0.446788
HELLS	0.446428
PRDX2	0.446371
C22orf45	0.446245
HIST2H2AC	0.445915
TFDP2	0.445713
LRP8	0.445613
ZNF358	0.445515
HLF	0.44534
CIT	0.445128
AURKA	0.444923
PTDSS1	0.444822
CEP72	0.444699
C2orf65	0.444396
CDCA8	0.444378
SLC12A8	0.444215
DDTL	0.44418
ZNF507	0.444175
JAKMIP2	0.443374
DEPDC6	0.443317
NCRNA00219	0.443168
PBX1	0.44287
PDRG1	0.442662
AGAP7	0.44261
C1QL1	0.442495
CENPA	0.442482
LHX6	0.442311
IGSF9	0.442016
CD9	0.441959
C1orf31	0.441864
MIPOL1	0.441862
PPARG	0.441714
TRIM28	0.441384
PSRC1	0.440954
FREM2	0.440912
PRR5L	0.440828
KLRG2	0.44043
PDCD5	0.440392
PLAC1	0.440301
CCNB2	0.440059
GLTSCR2	0.439788
GPD2	0.439579
LOC284900	0.439542
ANKRD20B	0.439341
GEMIN8P4	0.439225
XRCC3	0.439107
RFC5	0.438707
FLJ26850	0.438565
UNC93B1	0.438559
C9orf24	0.43829
NGFR	0.438289
LSM7	0.43804
NR2F6	0.437708
NCRNA00204B	0.437382
RFPL1S	0.436948
RIPPLY2	0.436942
ZNF446	0.436655
LOC152217	0.436644
KCNJ16	0.436503
PLIN4	0.436488
CHAF1B	0.436024
HMGB2	0.435989
COX5B	0.435619
UHRF1	0.435541
GLT25D2	0.435438
BOLA3	0.435404
DGKE	0.435312
IL12A	0.43485
MIF	0.434822
H1FX	0.434558
ZNF473	0.434333
BAD	0.434295
PIGU	0.434261
ESPN	0.434214
FAM128B	0.434212
FUZ	0.433937
LOC93622	0.433705
CDCA2	0.433656
ARHGAP33	0.433311
RPL18	0.433303
TSC22D3	0.433084
TMEM190	0.432728
POLA2	0.432714
PCDHA10	0.432693
S1PR5	0.432691
CEP70	0.432636
ARHGAP4	0.432573
LOC440957	0.432275
ALKBH2	0.432231
TMEM161A	0.432196
TAC3	0.432187
C4orf48	0.431728
GPC2	0.431695
GLB1L	0.431528
SHISA9	0.431273
IDH1	0.431269
PALM3	0.431236
IL29	0.431105
CLEC18B	0.430925
MAD2L1	0.430723
GPR143	0.430643
RPRM	0.430369
MAGIX	0.430281
C21orf58	0.430031
LOC81691	0.429928
GPR3	0.429812
FOXG1	0.429811
C3orf58	0.429801
KIF18B	0.429791
TMEM201	0.429708
MCM6	0.429647
NUSAP1	0.429275
ARHGEF16	0.429217
CA14	0.429141
LOC401431	0.429049
PLD3	0.429026
SLC25A38	0.428943
RGS6	0.428926
RCCD1	0.428739
MRPL11	0.428623
PCNA	0.428439
SEMA3E	0.428396
NXT1	0.428384
FAM72A	0.428382
C14orf80	0.428359
LHX2	0.428203
RTBDN	0.428129
HPD	0.42788
FEN1	0.427406
RAB3IP	0.427065
RAB15	0.427011
CCDC136	0.426955
MGAT5B	0.426933
MGC70857	0.426546
C7orf59	0.426195
SCARNA2	0.426135
F2	0.425838
UPB1	0.425517
KIAA0146	0.425449
PCSK4	0.425442
LPCAT3	0.425366
FANCI	0.425076
ABCA4	0.425028
RHOC	0.424835
ATHL1	0.424733
METRN	0.424684
CCDC11	0.424457
SPDYE8P	0.424432
ZFP14	0.424303
FAM72D	0.424261
NENF	0.424239
TMEM180	0.423847
ZWINT	0.423613
IL34	0.423564
XRCC1	0.42322
NUDT10	0.423191
KIF15	0.422848
MT1H	0.422727
SEL1L3	0.42253
RABL2A	0.422475
NOS1AP	0.422213
CAPN9	0.422169
SLC25A10	0.422108
MAGED4	0.421987
DNAH2	0.421918
C12orf73	0.421693
C13orf38	0.421639
KREMEN2	0.421177
PTGER1	0.420777
HAUS5	0.420321
TIMELESS	0.420297
C2orf82	0.420237
CABLES2	0.420132
C19orf45	0.420129
RINL	0.419886
DPYSL5	0.419489
DGKB	0.419176
CTRB2	0.419134
HOXA9	0.419085
NEURL2	0.419035
HS3ST5	0.418735
ZNF768	0.418629
PCDHA5	0.418221
EPB49	0.418198
DCTPP1	0.418104
KIAA1804	0.417914
MSH6	0.41787
CHTF18	0.417736
ASPSCR1	0.417649
RHBDL3	0.416985
SPIN2B	0.416886
SNRPA	0.416882
ZNF90	0.416862
ARHGEF19	0.416315
C12orf10	0.416276
NPBWR1	0.416238
HTRA4	0.416231
ZFP3	0.415674
CCR10	0.415623
VSIG2	0.415345
SCCPDH	0.415239
AMH	0.415135
ADAMTS20	0.414811
TLE6	0.414769
DDX11	0.414707
TSEN34	0.414641
CCNA2	0.414374
MCCC1	0.414172
REN	0.413801
ARL16	0.413766
VWCE	0.413635
AS3MT	0.413578
SLCO3A1	0.413569
LOC650368	0.413327
TRPM2	0.41299
PMS2L2	0.412958
CDK3	0.412824
ZNF581	0.412812
C5orf30	0.412725
RPS21	0.412627
TIMM17B	0.412335
LOC341056	0.412319
QRICH2	0.412158
BOLA1	0.412031
HNF1A	0.411772
ZNF519	0.411522
PXMP2	0.411514
RASL11A	0.411441
TRIM59	0.411229
C9orf45	0.411205
SPRN	0.411096
KLHL13	0.411053
DDX12	0.410908
STXBP5L	0.410565
LOC285548	0.410494
SARS2	0.41011
STATH	0.409969
TMEM194A	0.409956
C16orf13	0.409868
PBX4	0.409702
RBM38	0.40967
CYP4B1	0.409659
FPGS	0.409528
IGFALS	0.409254
FIZ1	0.409086
DGCR6	0.408802
TOP2A	0.408397
CDCA7L	0.408281
TNNI3	0.408111
LOC729234	0.407805
GABARAPL3	0.40772
MGC87042	0.407672
LOC222699	0.407408
SOD1	0.407356
FKBP4	0.407322
OR7C1	0.40724
TYSND1	0.407161
NWD1	0.406967
CBX6	0.406784
HSPD1	0.406711
MRPL12	0.406661
WFIKKN1	0.40653
C5orf23	0.406448
RYR1	0.406119
ONECUT1	0.405843
PABPC1L	0.40578
GDF11	0.40578
RPL13AP20	0.405728
SLC15A2	0.405688
FOXM1	0.405678
SNRPE	0.405552
TMEM42	0.405427
APOBEC3B	0.405323
NCAPD2	0.405287
CDKN3	0.405086
C16orf79	0.405048
MST1P2	0.404938
MTHFD2	0.404903
CABC1	0.404829
C9orf173	0.404782
COX6B1	0.404544
PTTG2	0.404486
FANCB	0.404472
IQGAP3	0.404292
ALDOC	0.404145
ZNF229	0.404044
MRPS24	0.403893
PTPRH	0.403718
TRIM45	0.403669
PRIM1	0.403586
MTP18	0.403578
C1orf65	0.403509
C11orf67	0.403479
CLDN6	0.403442
LOC80054	0.403421
SNRPF	0.403303
ELOVL6	0.403183
C19orf40	0.403167
THYN1	0.403084
SPANXE	0.403023
FAM98C	0.40282
ALG1L2	0.402692
PTTG1	0.402673
EIF3K	0.402648
STRC	0.402329
TMEM44	0.402286
MYPOP	0.402207
KRTCAP2	0.40209
RAET1K	0.4019
BCL8	0.401849
VDAC3	0.401714
ZNF524	0.401454
TMEM223	0.401387
LOC100130691	0.401248
SNHG5	0.401242
THAP7	0.400901
RNF175	0.400807
HDDC3	0.40047
RAB20	0.400334
RHBDD2	0.400322
WNT9A	0.400319
PNMT	0.40011
KRTAP5-9	0.399888
FGF21	0.399885
IGSF11	0.399762
PAPPA2	0.399753
SLC16A3	0.399731
LRTOMT	0.39973
OSTalpha	0.399376
CHPT1	0.399061
ALDH3B1	0.398997
PTGES	0.398957
C6orf48	0.398522
CLN6	0.398458
TERC	0.398436
KCNG1	0.398415
ETV2	0.398374
NRG4	0.398291
SLC39A11	0.397975
CGN	0.39752
ABHD12	0.397504
RPP21	0.397345
RPS5	0.397195
BUB1B	0.396994
GPR160	0.396462
LCT	0.396362
TRAF4	0.39632
EID3	0.396075
FGF2	0.39607
DDT	0.396043
FAH	0.395989
IQCB1	0.3959
LIPH	0.395661
PRAF2	0.395254
ECE2	0.395205
C9orf68	0.395136
C17orf89	0.394917
CNPY2	0.394839
FAM164C	0.394753
C12orf76	0.39432
TSTD1	0.394169
ACOT4	0.39362
CCDC160	0.393597
ZNF280A	0.39359
LOC642846	0.393572
HOXA13	0.393476
UBE2M	0.3934
SLC10A5	0.393158
ASPHD1	0.393158
KRT74	0.39286
GALNT5	0.392849
MANSC1	0.392693
PRKAA2	0.392322
FAM53A	0.39231
IL17RB	0.392232
STK33	0.39165
C9orf53	0.391582
AKAP1	0.391565
E2F7	0.391474
BCAN	0.391449
PRELID2	0.391377
BIRC3	0.391287
FOXA3	0.391204
SPDEF	0.391168
AMBP	0.390958
VCX3A	0.390862
PPP1R16A	0.390717
KLF1	0.390546
HSF4	0.390473
SERPINI2	0.390471
C16orf48	0.390407
NOXO1	0.390348
KIAA1875	0.39027
HRASLS	0.390066
SPINK2	0.389886
C15orf61	0.389847
SLC34A2	0.389672
CEACAM16	0.389566
FBXO15	0.389529
MDM1	0.389528
TIMP1	0.389438
JTB	0.38921
RAB34	0.389114
RPL28	0.388959
FGF17	0.388927
PIGX	0.388736
C5	0.38863
C12orf34	0.388565
GJB7	0.388518
PTCHD2	0.38845
AGMAT	0.38814
RAB3A	0.388053
PIF1	0.387806
FAM165B	0.387727
KIF4A	0.387724
APOC1	0.387519
HKR1	0.387505
C3orf16	0.387457
ICA1L	0.387305
HADH	0.387189
AFF2	0.387149
RPL9	0.387048
MRPL34	0.386868
ZBTB42	0.386867
RTP3	0.386758
FOXQ1	0.386743
CXCL17	0.386716
ASPH	0.38646
44629	0.386301
SERPINI1	0.386296
CIB1	0.386267
STARD7	0.386177
C6orf130	0.385965
TRPV6	0.385869
C16orf90	0.385733
LRFN4	0.385574
CLCNKA	0.385379
WDR62	0.385055
TMEM109	0.384921
CMTM8	0.384886
LYN	0.384738
C10orf90	0.384715
PKMYT1	0.384709
HRCT1	0.384405
SLC2A4	0.384301
EPR1	0.38375
RPL13A	0.383706
LOC100128675	0.383525
PROCA1	0.383396
ALKBH6	0.383387
FLJ35776	0.383149
SNORD17	0.383034
IRF3	0.382975
WDR18	0.382379
MAMSTR	0.382212
DTYMK	0.382209
NKX3-1	0.382113
OBFC2B	0.381944
ZNF696	0.381702
SIVA1	0.381574
MYBPC3	0.381537
REPIN1	0.381477
COX6A1	0.38142
FBXL14	0.381331
VGF	0.381319
GIT1	0.381139
CCDC58	0.381033
LMNB1	0.380945
E2F5	0.380803
DYRK1B	0.380766
NT5DC2	0.380612
WDR38	0.380322
DYDC2	0.380069
CNGB3	0.380002
ZCCHC3	0.37977
SLC2A4RG	0.379644
PTTG3P	0.37954
MCM5	0.379333
TMEM143	0.379099
WNT16	0.379059
RAB42	0.378978
SLC16A5	0.378837
VOPP1	0.378716
NTHL1	0.378505
CLEC18A	0.378128
NAT8L	0.378036
C12orf62	0.377963
EBF4	0.377687
LTBP4	0.377625
POM121L10P	0.377467
FAM117B	0.377405
ARHGAP39	0.37728
PPP5C	0.377031
SGOL1	0.376974
C17orf67	0.376719
LOC147804	0.376711
LOC151009	0.376546
MAMDC4	0.376533
C2orf39	0.376526
NUDT1	0.376337
ST20	0.376004
PMS2L11	0.375838
ANKRD13B	0.375765
CPSF4	0.375717
SLC5A2	0.375712
SLC7A9	0.375643
C6orf136	0.375575
SVOPL	0.375575
UXS1	0.375519
MSI2	0.375513
MRPL24	0.37549
AURKAPS1	0.375258
ECH1	0.375083
SREBF1	0.374836
NEDD4L	0.374793
LMO4	0.374589
LOC221442	0.37432
CDH24	0.374319
CNNM3	0.37421
CNTD1	0.373684
ALKBH7	0.373671
ABHD2	0.373357
LOC148709	0.37313
MT1G	0.372918
POC1A	0.372851
NLE1	0.372839
NTN5	0.372669
CD38	0.372613
C12orf48	0.372319
DOC2A	0.372313
KIFC1	0.372189
FGFR2	0.371901
GTPBP3	0.371839
ZCWPW1	0.371807
SCARNA10	0.371718
PRRT3	0.371718
C9orf119	0.371616
MMP7	0.371364
CYP4Z1	0.371295
ABCC6	0.371262
TBCB	0.371185
RPL39	0.371104
C8orf40	0.370942
DDAH1	0.370938
CDC6	0.370844
ADAM22	0.370761
NKAIN2	0.370747
SNTN	0.370697
C7orf13	0.370538
GDF5	0.370509
RPIA	0.370421
FOLR1	0.370307
RALY	0.370058
TMEM84	0.369594
NDUFB11	0.369442
ProSAPiP1	0.369431
DIAPH2	0.369303
CNIH2	0.369255
ZDHHC23	0.369152
PDZK1P1	0.369092
OSBPL7	0.369039
TMSB15A	0.368901
ADH5	0.368848
ADAD2	0.36884
C2orf81	0.368771
TPPP	0.368725
NECAB3	0.368561
SPR	0.368266
PPIH	0.368206
DSG2	0.367977
TERT	0.367967
CITED1	0.367959
TRAF2	0.367688
MCF2L	0.36767
RPS16	0.367526
GRB14	0.367509
PRR24	0.367465
RPS10P7	0.367398
TM7SF3	0.367279
PKN3	0.366875
CCDC57	0.366474
TMC6	0.366455
PHF17	0.366304
GBX1	0.366171
MSGN1	0.366103
FOXD4L1	0.365995
TMEM231	0.365992
NRIP3	0.36598
RPS11	0.365683
ARNT2	0.365478
NKX2-2	0.365258
CTSE	0.365187
KRT38	0.364997
FAM123B	0.364987
EIF4EBP1	0.364825
HES4	0.364689
TUBA3E	0.364622
NSUN5P1	0.364545
MUC17	0.364297
AQP11	0.36428
IQCC	0.364259
C9orf172	0.364154
AGBL5	0.363981
KRT40	0.363954
GMNN	0.363873
GSG2	0.363734
CACYBP	0.363643
HAUS7	0.363626
CST1	0.363467
APOO	0.363285
BTNL9	0.363198
CCDC101	0.363144
RCC1	0.363053
CHST5	0.36304
ACADS	0.362968
FAM186A	0.362919
ABCC1	0.362647
ZNF703	0.362476
STRBP	0.362227
KCNH4	0.362022
PYGB	0.361823
HRG	0.361797
GLOD5	0.361795
SNRPB	0.361721
SLC2A12	0.361345
ACBD6	0.361255
SULT1A3	0.361214
MRPS2	0.361201
NMUR2	0.361124
BCL2	0.361028
TRIM7	0.361027
CNTD2	0.360908
ALG10	0.360817
NFE2L3	0.360422
CYP11A1	0.360371
ASPM	0.360357
MYLIP	0.360141
FAM157A	0.360129
LRRC24	0.359996
ZNF566	0.359983
CTSH	0.359748
C20orf3	0.359731
RPL35A	0.359652
BAX	0.359507
KIAA1522	0.359411
GINS1	0.359209
SLC37A1	0.358912
ADRB1	0.358865
LOC25845	0.358782
NUP62CL	0.358747
ACCN2	0.358747
PDXP	0.358687
SMS	0.358609
RNF207	0.358552
LRRIQ1	0.358463
FAM90A1	0.358229
TAS2R20	0.358101
SOCS2	0.357831
RALGPS1	0.357759
AFP	0.357698
ARRDC2	0.357584
GPR83	0.357583
DCAKD	0.357523
MZF1	0.357453
POU5F1	0.357404
CBR3	0.357396
PIK3R3	0.357274
DBF4B	0.357197
CDK5RAP2	0.357115
C14orf143	0.35699
OVOL2	0.356903
ALDH1B1	0.356763
TACC3	0.35676
CAPNS1	0.356756
C5orf33	0.356754
ZNF367	0.356706
DOC2B	0.356636
GATA6	0.356385
ABCA3	0.356163
RPS15	0.355787
TMPO	0.355719
NPB	0.355634
YIF1B	0.355632
GUSBP3	0.355398
C2orf77	0.355378
FRS3	0.355338
DBF4	0.355317
TRIM50	0.355286
GCDH	0.355222
TMEM183A	0.355191
PLK1	0.355124
ZNF256	0.355018
NXPH4	0.354967
C14orf39	0.354645
ST3GAL1	0.35436
C1orf112	0.354314
C17orf28	0.354284
C17orf86	0.35407
LOC442421	0.354063
TMOD1	0.354054
C12orf32	0.353702
RANBP1	0.353332
PLCH1	0.353312
CCDC24	0.353192
MGC2752	0.353168
FGF12	0.35316
TPRN	0.353106
KIF1A	0.353044
MBOAT7	0.353038
SIPA1L3	0.352931
PCCA	0.352847
COX5A	0.352838
OLFM1	0.352788
SKA3	0.352782
RBP4	0.352743
LEAP2	0.352524
LRDD	0.352504
UNG	0.352421
FAM60A	0.352378
MCM8	0.352292
LOC285074	0.352162
TMEM90B	0.352065
GPATCH1	0.351977
KISS1R	0.351889
UGT1A4	0.35166
TRIM2	0.351657
TTC23L	0.351575
HOXB3	0.351321
UCN	0.35132
AMY1A	0.351284
NCAPH	0.351264
ERI3	0.351208
ULBP1	0.351023
GYG2	0.350789
RIBC1	0.350692
LOC441455	0.350557
CCDC123	0.350539
SHROOM3	0.350535
C6orf52	0.350265
B9D1	0.350076
C6orf147	0.350023
LIPT2	0.349961
YEATS4	0.349927
MRPL48	0.349922
NUDT8	0.349879
ZNF233	0.34985
PCP4L1	0.349635
ALOX12P2	0.349606
PIGZ	0.349407
NCAPH2	0.349398
SFT2D3	0.349325
TUBB4Q	0.349251
C11orf86	0.349226
LOC150776	0.349151
WDR83	0.349093
PELP1	0.348907
BLOC1S1	0.348837
EXOSC7	0.34877
MCM10	0.348411
TREX1	0.348333
FLJ42709	0.348281
PPP1R3D	0.348242
FAM122B	0.347931
SLC5A6	0.347851
ABAT	0.347772
BEST4	0.347755
UQCRHL	0.347247
ENHO	0.347236
FOXE1	0.347228
CDC20	0.347156
DIS3L	0.346971
BZRAP1	0.346958
UQCRH	0.346895
C11orf31	0.346863
PCDH19	0.346859
C9orf142	0.346824
ZNF280C	0.346762
KIAA0649	0.346605
B3GNTL1	0.346602
LOC387646	0.346431
PRX	0.346296
PAK4	0.346154
GPRC5C	0.345981
ERCC6L	0.34595
FZD7	0.345854
METTL1	0.345835
RASSF7	0.345668
ALDH3A2	0.345661
COX8A	0.345658
C10orf91	0.345573
LZTS2	0.345395
KIF11	0.345079
SDHAP3	0.345012
C9orf100	0.344995
HACL1	0.344936
KCNQ5	0.344932
FAM55C	0.344797
SLC2A11	0.344789
TCTN2	0.344744
GPRC5D	0.344706
MAGEA3	0.344598
FAM54A	0.344462
CASC2	0.344378
CENPN	0.344352
CCND3	0.344339
POU6F2	0.344326
C10orf10	0.344223
C16orf74	0.343857
SOX14	0.343856
FLJ42289	0.343782
CKB	0.343712
TMTC4	0.343661
SLC25A19	0.343652
KIAA2022	0.343638
C7orf47	0.343221
LOC284100	0.343217
EEPD1	0.343194
TMEM41A	0.34317
GRLF1	0.343162
BTBD2	0.34314
STRA13	0.343121
CEP250	0.343058
BRF2	0.343036
CBX8	0.342814
TIMM16	0.342806
CALML4	0.342688
ATP5G2	0.342627
WASH2P	0.342625
TSPAN6	0.342624
LOC84856	0.342264
FANCA	0.342237
ADI1	0.341955
RPL41	0.341888
CAGE1	0.341849
PCOLCE2	0.341745
B4GALT5	0.341743
C12orf65	0.341718
THAP10	0.341403
CHCHD7	0.341345
RPLP1	0.341336
C15orf23	0.341248
C22orf41	0.341114
CXorf42	0.34111
SNHG11	0.341059
SLC9A3R1	0.340971
PLAGL2	0.340835
SFTPC	0.340832
NDUFB7	0.340787
C19orf24	0.340756
ZNF692	0.34071
CGB7	0.340545
FRAS1	0.340441
BANF1	0.340421
RBM42	0.340348
TMEM147	0.340332
ODAM	0.340273
PTOV1	0.340189
POMZP3	0.340182
C12orf52	0.340043
ZNF576	0.339763
GAMT	0.33969
SURF1	0.33952
LOC100132287	0.339475
MAPK8IP1	0.339411
KITLG	0.339391
XRCC2	0.339268
CCT6P1	0.339154
LPAR2	0.339085
CCDC146	0.33895
MUTYH	0.338868
HDAC10	0.338712
LRRC49	0.338672
LETMD1	0.338491
FAM86B1	0.338261
BRI3BP	0.338241
SLC5A5	0.338186
DAK	0.338121
BRIX1	0.338073
GRB7	0.338054
U2AF1L4	0.338021
[truncated: 18,503 more rows]

[truncated: 23 more sheets: KICH, KIRC, KIRP, LAML, LGG, LIHC, LUAD, LUSC, MESO, OV, PAAD, PCPG, PRAD, READ, SARC, SKCM, STAD, TGCT, THCA, THYM …]
